# Supplementary material for: Cell States and Interactions of CD8 T Cells and Disease-Enriched Microglia in Human Brains with Alzheimer’s Disease
Source: MDPI journal article supplement (doi:10.3390/biomedicines12020308), 2024-01-25
Supplement: s1 [file s1]

## Lewy body pathology

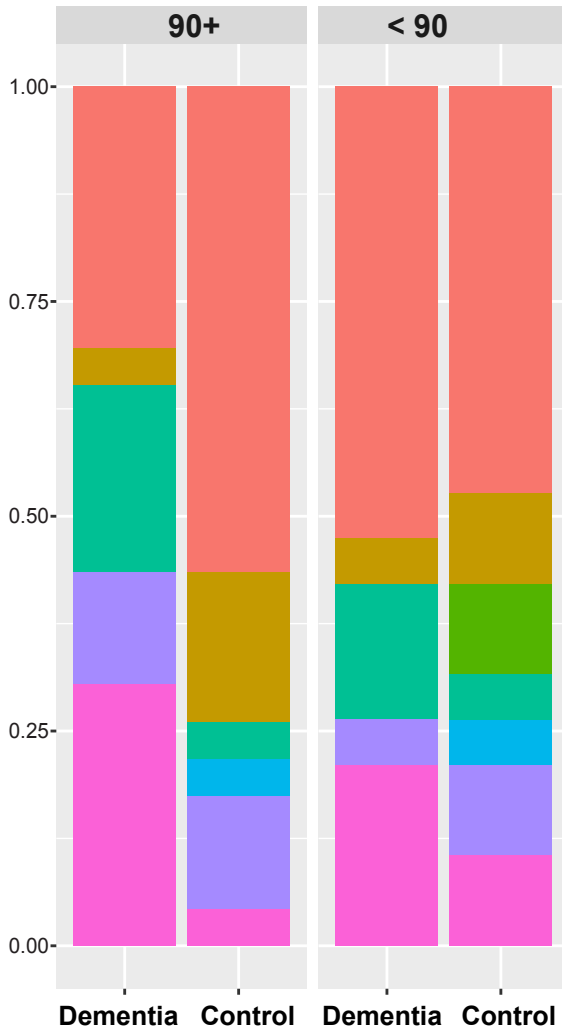

## Lewy body disease pathology

- Not Identified (olfactory bulb not assessed)
- Not Identified (olfactory bulb assessed)
- Olfactory bulb only
- Amygdala-predominant
- Brainstem-predominant
- Limbic (Transitional)
- Neocortical (Diffuse)
