# Supplementary material for: Cell States and Interactions of CD8 T Cells and Disease-Enriched Microglia in Human Brains with Alzheimer’s Disease
Source: MDPI journal article supplement (doi:10.3390/biomedicines12020308), 2024-01-25

**Total microglia**

**Dystrophic**

**Pathology-associated**

**Amyloid-responsive (ARM)**

**Homeostatic**

**Transition**

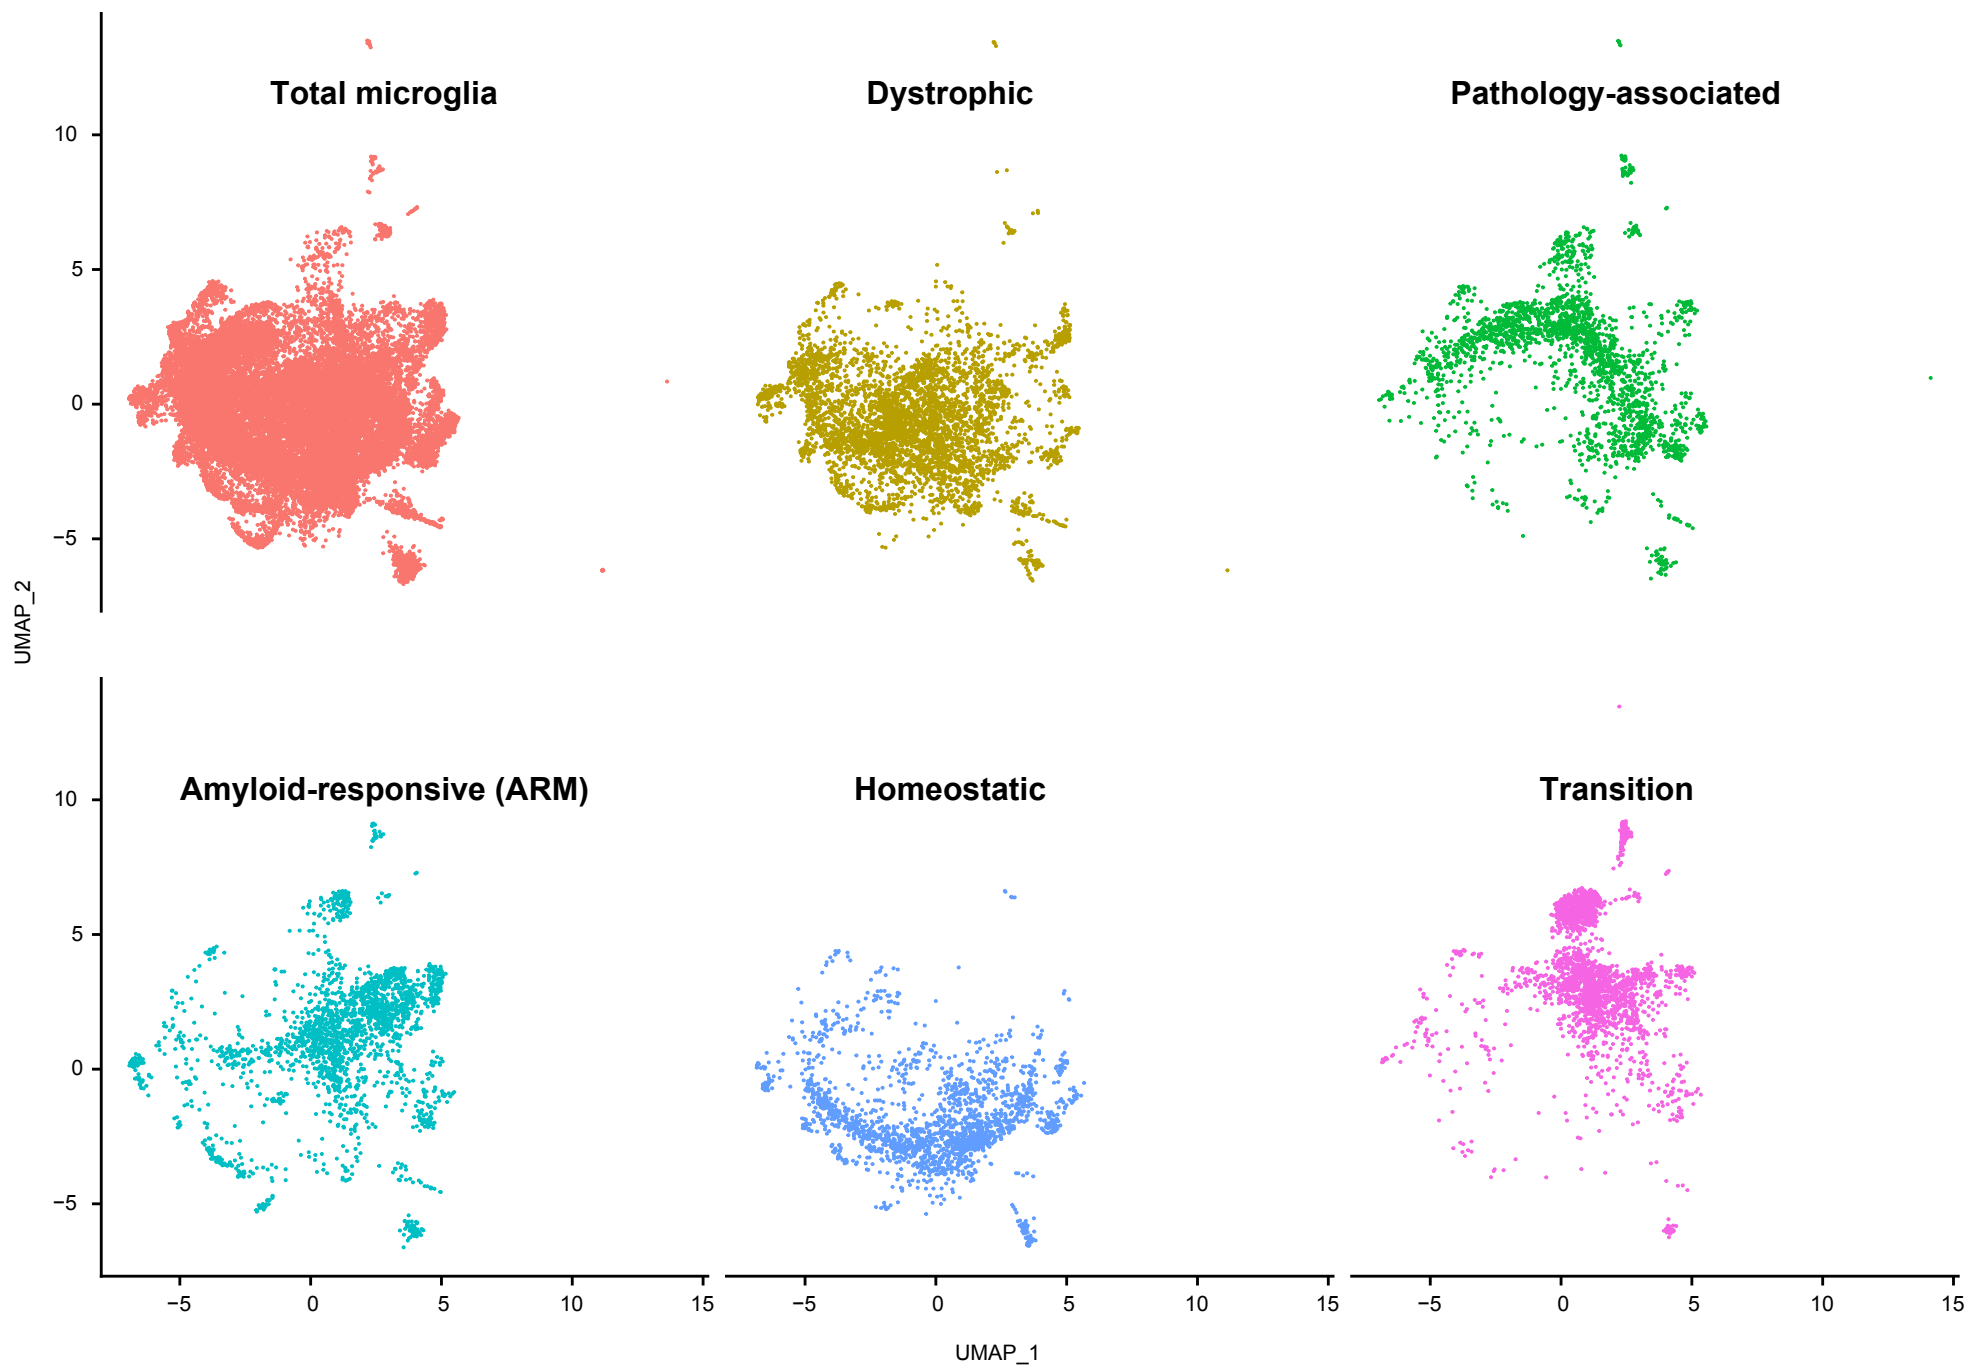

Supplement: s1 [file s1]
