# Supplementary material for: Cell States and Interactions of CD8 T Cells and Disease-Enriched Microglia in Human Brains with Alzheimer’s Disease
Source: MDPI journal article supplement (doi:10.3390/biomedicines12020308), 2024-01-25

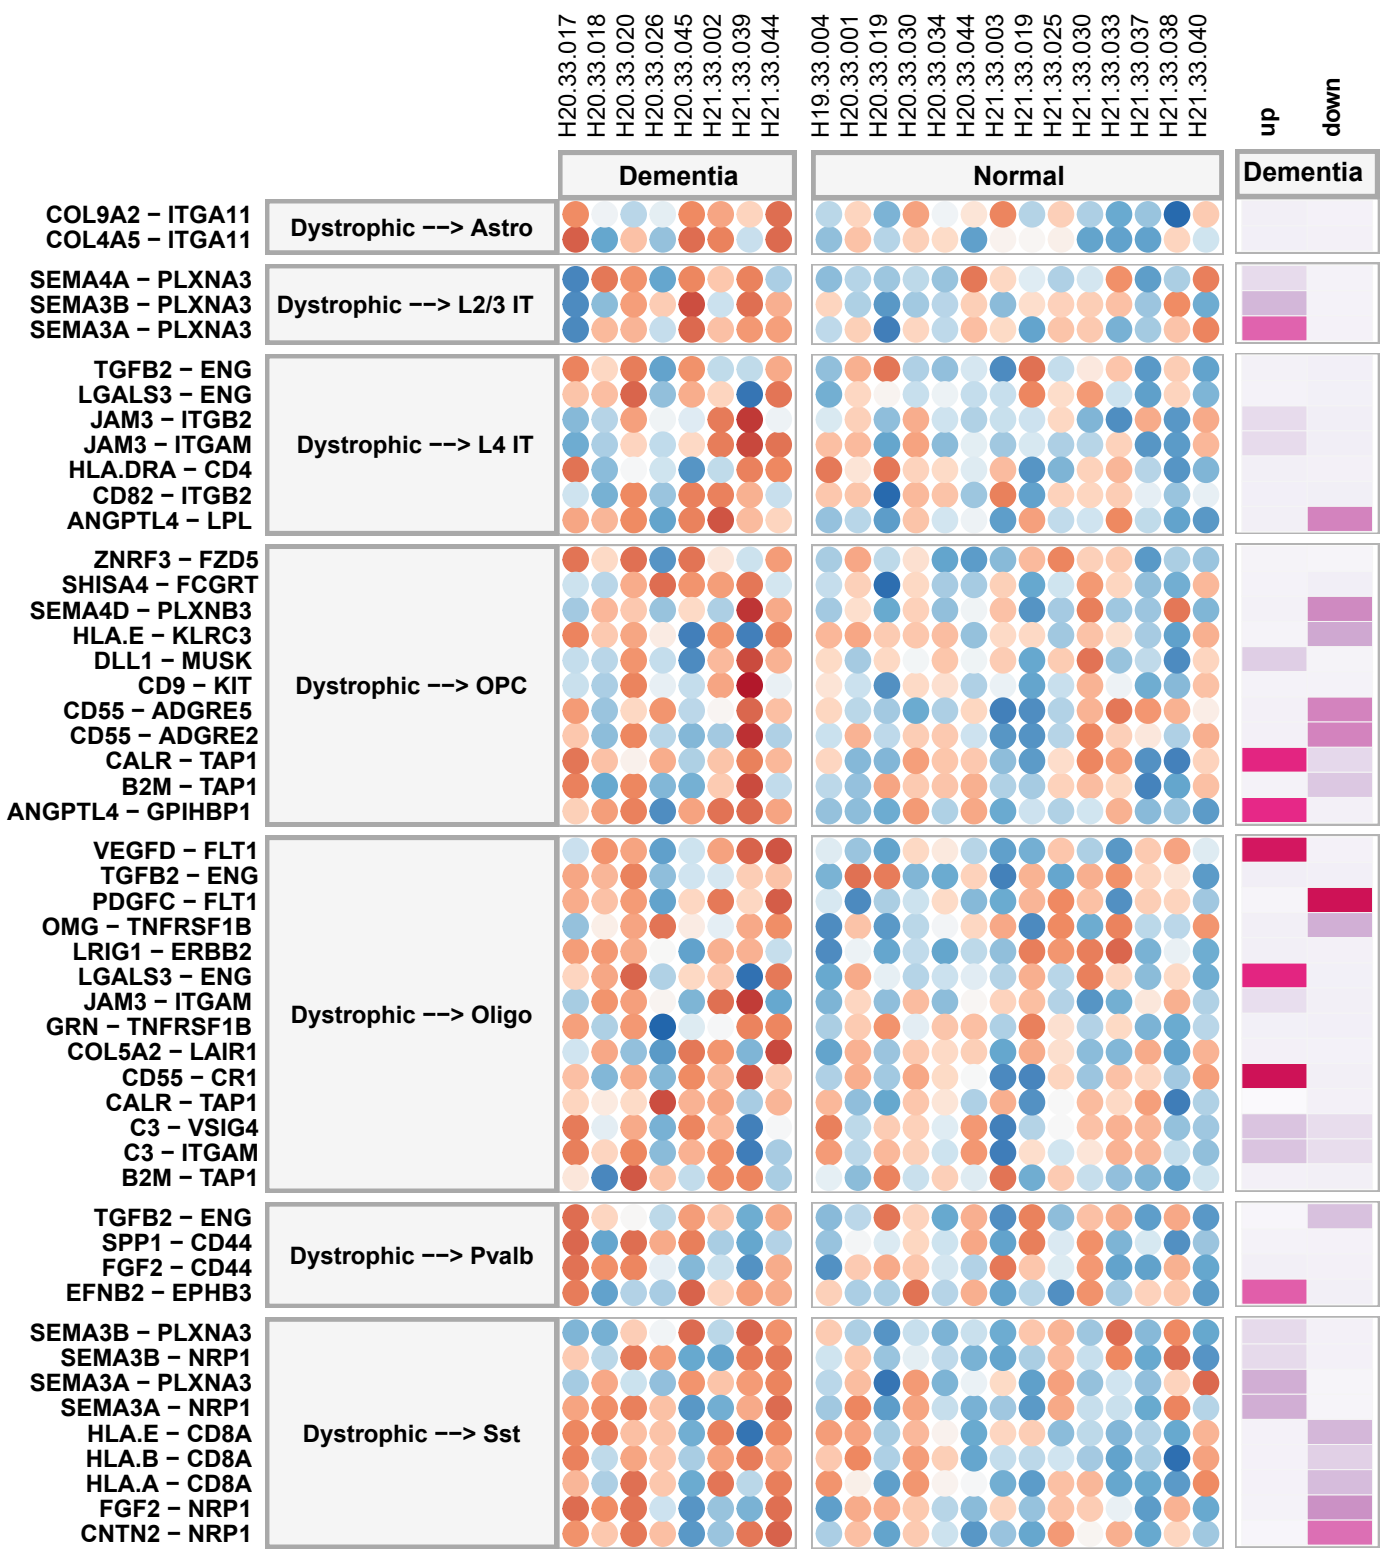

Sufficient presence  
of sender & receiver

● Sender & receiver present

Scaled L-R  
pseudobulk exprs product

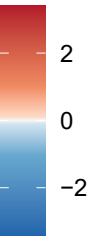

Scaled ligand  
activity in receiver

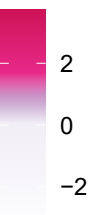

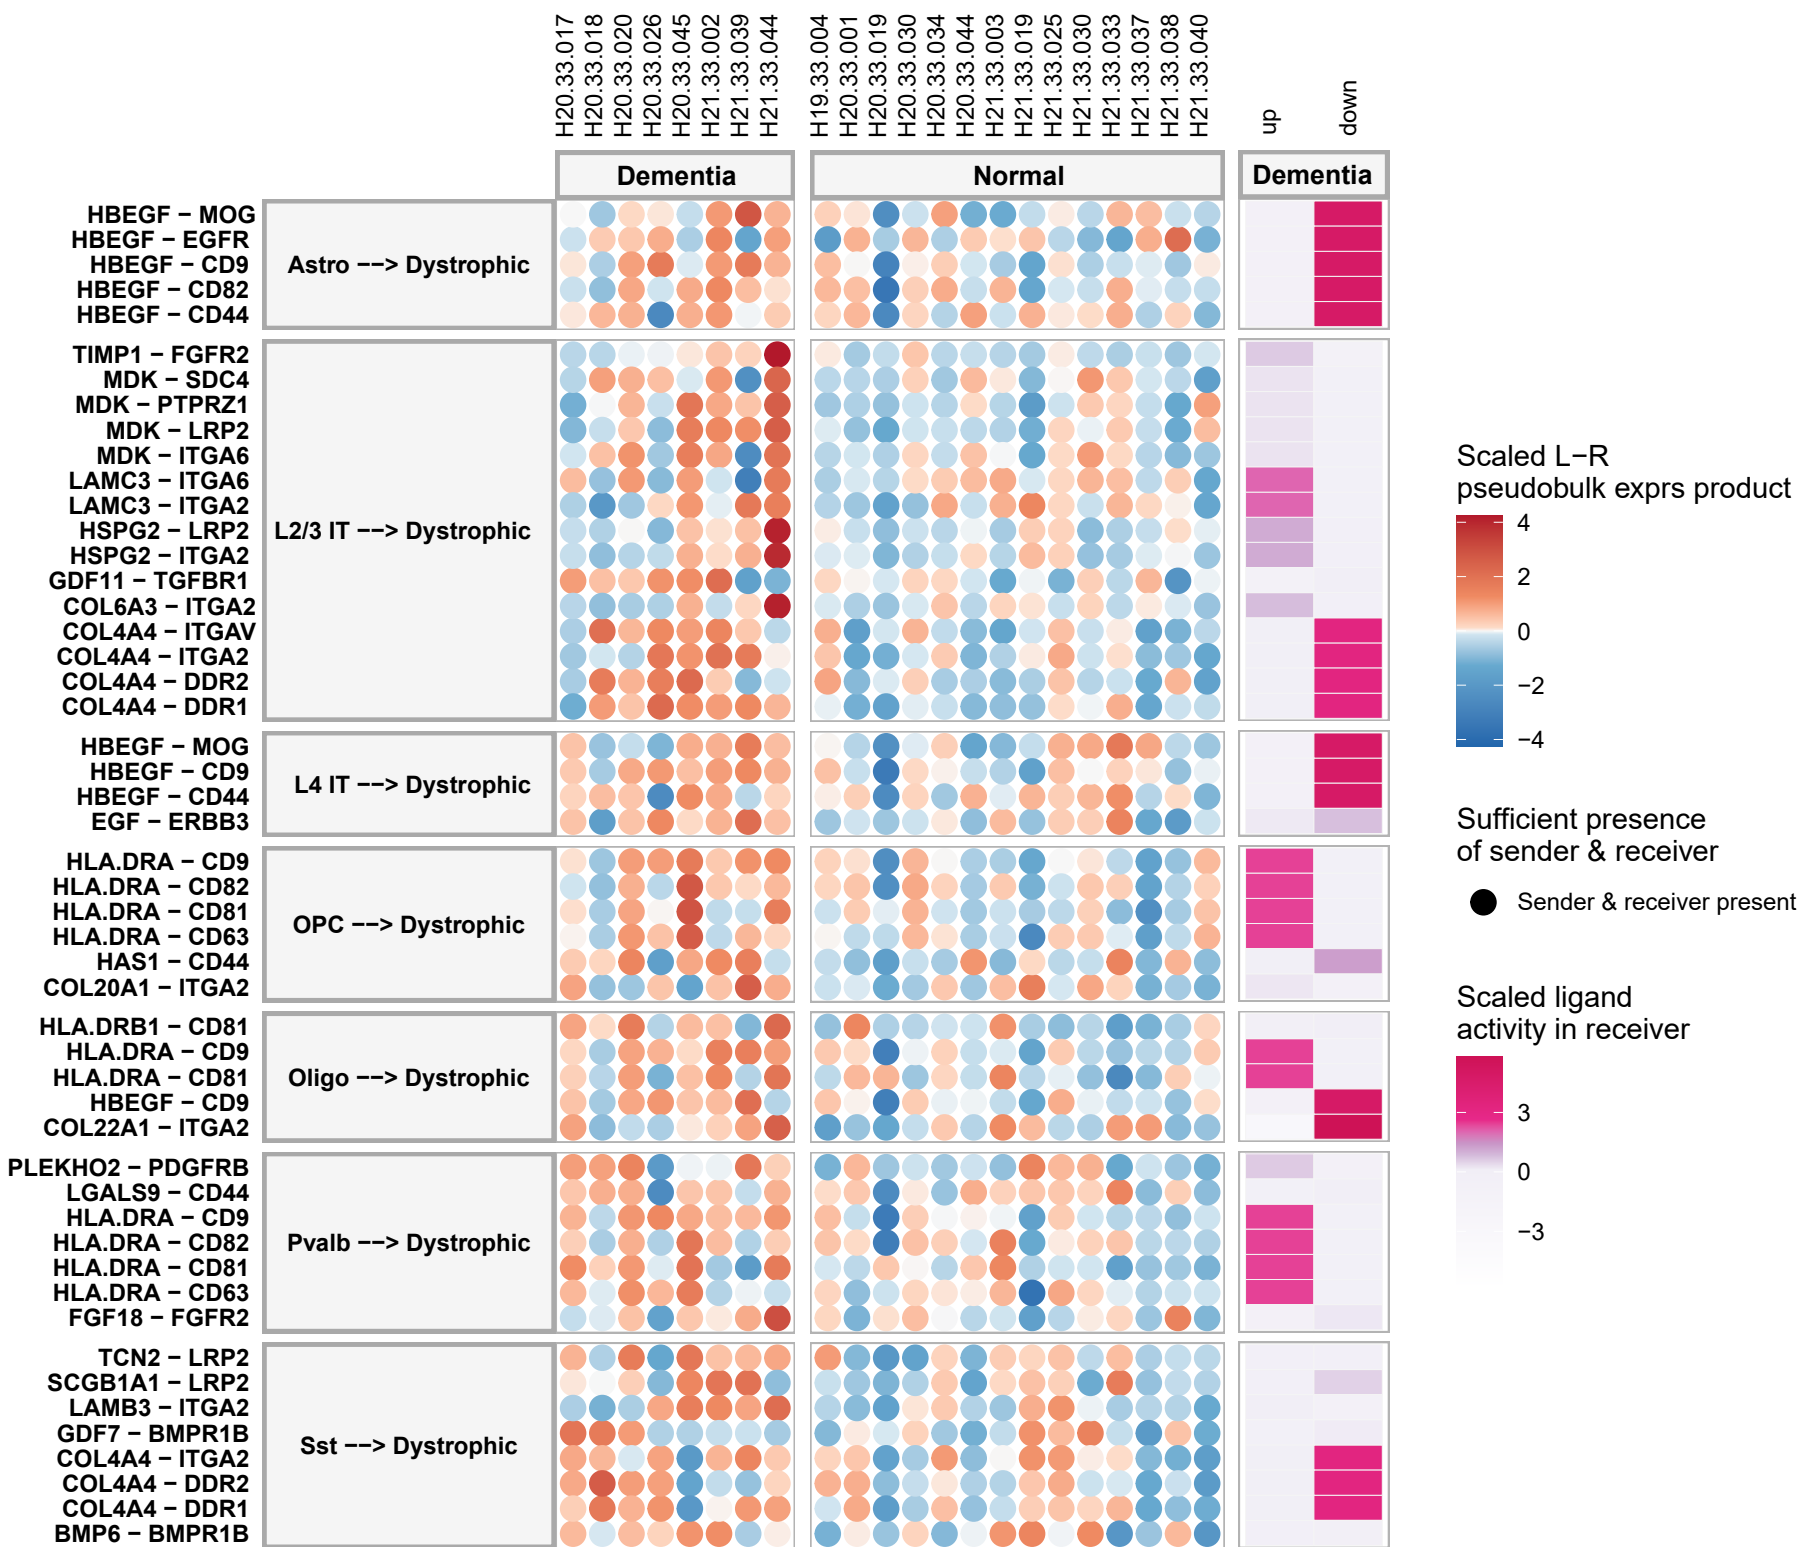

Scaled L-R  
pseudobulk exprs product

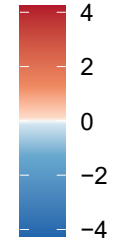

Sufficient presence  
of sender & receiver

● Sender & receiver present

Scaled ligand  
activity in receiver

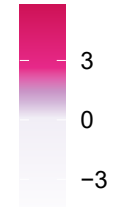

Supplement: s1 [file s1]
