# Supplementary material for: Cell States and Interactions of CD8 T Cells and Disease-Enriched Microglia in Human Brains with Alzheimer’s Disease
Source: Biomedicines. 2024 Jan 25;12(2):308. doi: 10.3390/biomedicines12020308 (PMC10886701; doi:10.3390/biomedicines12020308)
Supplement: Supplementary file 1 [file biomedicines-12-00308-s001.zip]

Archive with 21 entries (21 files):
- Supplementary Figure legends.pdf
- Supplementary Methods.pdf
- Supplementary_Figure_S1.pdf
- Supplementary_Figure_S10.pdf
- Supplementary_Figure_S11.pdf
- Supplementary_Figure_S12.pdf
- Supplementary_Figure_S13.pdf
- Supplementary_Figure_S14.pdf
- Supplementary_Figure_S15_1.pdf
- Supplementary_Figure_S15_2.pdf
- Supplementary_Figure_S16.pdf
- Supplementary_Figure_S2.pdf
- Supplementary_Figure_S3_AB.pdf
- Supplementary_Figure_S3_C.pdf
- Supplementary_Figure_S4.pdf
- Supplementary_Figure_S5.pdf
- Supplementary_Figure_S6.pdf
- Supplementary_Figure_S7.pdf
- Supplementary_Figure_S8.pdf
- Supplementary_Figure_S9.pdf
- Supplementary_Tables.xlsx
