# Supplementary material for: Cell States and Interactions of CD8 T Cells and Disease-Enriched Microglia in Human Brains with Alzheimer’s Disease
Source: Biomedicines. 2024 Jan 25;12(2):308. doi: 10.3390/biomedicines12020308 (PMC10886701; doi:10.3390/biomedicines12020308)
Supplement: Supplementary file 1 [file biomedicines-12-00308-s001.zip › Supplementary_Tables.xlsx]

## Sheet: Table of Contents
Table of Contents
Supplementary Table S1	Markers for lymphocytes
Supplementary Table S2	Donor metadata of 84 cases in the SEA-AD cohort
Supplementary Table S3	Differentially expressed genes in CD8 T cells
Supplementary Table S4	hdWGCNA network module assignment and module connectivities (kME) for CD8 T cells
Supplementary Table S5	GO and pathway enrichment for CD8T network modules
Supplementary Table S6	hdWGCNA network module assignment and module connectivities (kME) for microglia
Supplementary Table S7	GO and pathway enrichment for microglial network modules
Supplementary Table S8	Pathway enrichment for ligands on each sender cell type
Supplementary Table S9	Pathway enrichment for receptors on each receiver cell type
Supplementary Table S10	Pathway enrichment for ligand–receptor pairs on each cell type combination

## Sheet: Supplementary Table S1
markers	cell_type	reference
CD3D	lymphocytes	Todd N. Eagar, Stephen D. Miller, in Clinical Immunology (Fifth Edition), 2019
CD3E	lymphocytes	Todd N. Eagar, Stephen D. Miller, in Clinical Immunology (Fifth Edition), 2019
CD3G	lymphocytes	Todd N. Eagar, Stephen D. Miller, in Clinical Immunology (Fifth Edition), 2019
CD14	lymphocytes	https://www.nature.com/articles/s41423-020-00574-8
CD19	lymphocytes	https://www.nature.com/articles/s41423-020-00574-8
NCAM1	lymphocytes	https://www.nature.com/articles/s41423-020-00574-8
CD4	lymphocytes	Todd N. Eagar, Stephen D. Miller, in Clinical Immunology (Fifth Edition), 2019
CD8A	lymphocytes	Todd N. Eagar, Stephen D. Miller, in Clinical Immunology (Fifth Edition), 2019
CD8B	lymphocytes	Todd N. Eagar, Stephen D. Miller, in Clinical Immunology (Fifth Edition), 2019
FOXP3	lymphocytes	Todd N. Eagar, Stephen D. Miller, in Clinical Immunology (Fifth Edition), 2019
PTPRC	naïve; Temra; virtual memory T; resident memory T	Todd N. Eagar, Stephen D. Miller, in Clinical Immunology (Fifth Edition), 2019
CCR7	naïve; central memory T	Todd N. Eagar, Stephen D. Miller, in Clinical Immunology (Fifth Edition), 2019
IL7R	naïve; central memory T; virtual memory T	Todd N. Eagar, Stephen D. Miller, in Clinical Immunology (Fifth Edition), 2019
IL2RG	naive	Todd N. Eagar, Stephen D. Miller, in Clinical Immunology (Fifth Edition), 2019
TCF7	naïve; central memory T	Todd N. Eagar, Stephen D. Miller, in Clinical Immunology (Fifth Edition), 2019
LEF1	naive	Todd N. Eagar, Stephen D. Miller, in Clinical Immunology (Fifth Edition), 2019
SELL	naïve; central memory T	Todd N. Eagar, Stephen D. Miller, in Clinical Immunology (Fifth Edition), 2019
PRF1	cytotoxic	https://www.ncbi.nlm.nih.gov/pmc/articles/PMC7115982/
GZMA	cytotoxic	https://www.ncbi.nlm.nih.gov/pmc/articles/PMC7115982/
GZMB	cytotoxic	https://www.ncbi.nlm.nih.gov/pmc/articles/PMC7115982/
NKG7	cytotoxic	https://www.ncbi.nlm.nih.gov/pmc/articles/PMC7115982/
CXCR3	cytotoxic	https://www.ncbi.nlm.nih.gov/pmc/articles/PMC7115982/
KLRG1	cytotoxic	https://www.ncbi.nlm.nih.gov/pmc/articles/PMC7115982/
FGFBP2	cytotoxic	https://www.ncbi.nlm.nih.gov/pmc/articles/PMC7115982/
FCGR3A	cytotoxic	https://www.ncbi.nlm.nih.gov/pmc/articles/PMC7115982/
PDCD1	exhausted	https://www.ncbi.nlm.nih.gov/pmc/articles/PMC7115982/
LAG3	exhausted	https://www.ncbi.nlm.nih.gov/pmc/articles/PMC7115982/
HAVCR2	exhausted	https://www.ncbi.nlm.nih.gov/pmc/articles/PMC7115982/
CD244	exhausted	https://www.ncbi.nlm.nih.gov/pmc/articles/PMC7115982/
CD200	exhausted	https://www.ncbi.nlm.nih.gov/pmc/articles/PMC7115982/
CTLA4	exhausted	https://www.ncbi.nlm.nih.gov/pmc/articles/PMC7115982/
CX3CR1	effector memory T	https://www.frontiersin.org/articles/10.3389/fimmu.2018.02692/full
TBX21	effector memory T	https://www.frontiersin.org/articles/10.3389/fimmu.2018.02692/full
PRDM1	effector memory T; virtual memory T	https://www.frontiersin.org/articles/10.3389/fimmu.2018.02692/full
ID2	effector memory T	https://www.frontiersin.org/articles/10.3389/fimmu.2018.02692/full
STAT4	effector memory T	https://www.frontiersin.org/articles/10.3389/fimmu.2018.02692/full
CD27	central memory T	https://www.frontiersin.org/articles/10.3389/fimmu.2018.02692/full
EOMES	central memory T	https://www.frontiersin.org/articles/10.3389/fimmu.2018.02692/full
BCL6	central memory T	https://www.frontiersin.org/articles/10.3389/fimmu.2018.02692/full
STAT3	central memory T	https://www.frontiersin.org/articles/10.3389/fimmu.2018.02692/full
ID3	central memory T	https://www.frontiersin.org/articles/10.3389/fimmu.2018.02692/full
CD69	resident memory T	DOI: 10.1038/s41467-018-07053-9
ITGAE	resident memory T	DOI: 10.1038/s41467-018-07053-9
ITGA1	resident memory T	DOI: 10.1038/s41467-018-07053-9
ZNF683	resident memory T	DOI: 10.1038/s41467-018-07053-9
NR4A1	virtual memory T	doi:10.4110/IN.2023.23.E8
KLRC1	virtual memory T	doi:10.4110/IN.2023.23.E8
KIR2DL1	virtual memory T	doi:10.4110/IN.2023.23.E8
KIR2DL3	virtual memory T	doi:10.4110/IN.2023.23.E8
KIR2DL4	virtual memory T	doi:10.4110/IN.2023.23.E8
KIR3DL1	virtual memory T	doi:10.4110/IN.2023.23.E8
KIR3DL2	virtual memory T	doi:10.4110/IN.2023.23.E8
KIR3DL3	virtual memory T	doi:10.4110/IN.2023.23.E8

## Sheet: Supplementary Table S2
Donor.ID	Cognitive.Status	Gender	Age.at.Death	PMI	Thal	Braak	CERAD.score	APOE4.Status
H20.33.034	No dementia	Female	85	10.0167	Thal 3	Braak IV	Absent	N
H21.33.035	No dementia	Female	90+	4.8	Thal 5	Braak V	Moderate	N
H20.33.014	No dementia	Female	82	7.4	Thal 3	Braak IV	Sparse	N
H21.33.015	No dementia	Male	90+	4.1	Thal 2	Braak IV	Sparse	N
H20.33.033	Dementia	Male	68	6.5	Thal 5	Braak VI	Frequent	N
H21.33.043	Dementia	Female	90+	4.4	Thal 4	Braak II	Sparse	N
H21.33.005	Dementia	Male	90+	10.2	Thal 3	Braak V	Moderate	N
H20.33.031	Dementia	Female	87	7.91667	Thal 4	Braak VI	Frequent	N
H21.33.036	No dementia	Female	90+	4	Thal 4	Braak V	Frequent	N
H21.33.002	Dementia	Female	70	3.2	Thal 5	Braak VI	Frequent	Y
H20.33.025	No dementia	Male	90+	4.5	Thal 4	Braak V	Moderate	N
H21.33.047	No dementia	Male	90+	4.4	Thal 2	Braak V	Frequent	N
H21.33.040	No dementia	Male	83	5.6	Thal 4	Braak V	Frequent	Y
H20.33.001	No dementia	Male	82	7.7	Thal 2	Braak IV	Sparse	N
H21.33.026	No dementia	Female	90+	4.1	Thal 4	Braak V	Frequent	Y
H21.33.008	Dementia	Female	90+	5	Thal 4	Braak V	Frequent	N
H21.33.001	Dementia	Male	80	9.6	Thal 2	Braak III	Absent	N
H20.33.046	Dementia	Male	90+	8	Thal 5	Braak VI	Frequent	N
H20.33.040	Dementia	Male	90+	5.03	Thal 4	Braak IV	Frequent	N
H20.33.002	No dementia	Female	90+	4.33333	Thal 0	Braak IV	Absent	N
H21.33.025	No dementia	Female	88	8.6	Thal 3	Braak IV	Moderate	N
H20.33.026	Dementia	Female	75	7	Thal 4	Braak VI	Frequent	Y
H21.33.018	Dementia	Female	89	10.2333	Thal 3	Braak II	Frequent	N
H19.33.004	No dementia	Female	80	8.13333	Thal 0	Braak IV	Absent	N
H21.33.019	No dementia	Male	75	10.0167	Thal 1	Braak 0	Sparse	N
H21.33.013	Dementia	Female	90+	7.3	Thal 4	Braak V	Moderate	Y
H20.33.020	Dementia	Male	81	6.63333	Thal 5	Braak VI	Frequent	Y
H21.33.022	No dementia	Female	82	4.83333	Thal 2	Braak VI	Moderate	N
H20.33.041	Dementia	Female	90+	5.91667	Thal 4	Braak V	Moderate	N
H20.33.018	Dementia	Female	81	4.5	Thal 5	Braak VI	Frequent	Y
H21.33.004	No dementia	Male	90+	5	Thal 0	Braak II	Absent	N
H21.33.011	No dementia	Female	83	3.6	Thal 0	Braak IV	Absent	N
H20.33.044	No dementia	Male	81	4.7	Thal 0	Braak V	Absent	N
H20.33.012	No dementia	Female	90+	7.71667	Thal 1	Braak III	Absent	N
H21.33.041	No dementia	Female	90+	7.5	Thal 0	Braak IV	Absent	N
H21.33.006	No dementia	Male	90+	9.8	Thal 4	Braak IV	Sparse	Y
H21.33.014	No dementia	Male	90+	9.5	Thal 4	Braak IV	Sparse	N
H21.33.044	Dementia	Female	88	7	Thal 3	Braak VI	Frequent	N
H20.33.028	Dementia	Female	90+	7.4	Thal 4	Braak V	Moderate	N
H21.33.010	Dementia	Female	90+	9.6	Thal 5	Braak VI	Frequent	N
H21.33.046	Dementia	Male	90+	7	Thal 4	Braak V	Moderate	N
H21.33.029	Dementia	Male	89	11.0333	Thal 5	Braak V	Frequent	Y
H21.33.037	No dementia	Female	88	6.5	Thal 2	Braak IV	Absent	N
H20.33.017	Dementia	Male	69	5.5	Thal 4	Braak VI	Frequent	N
H21.33.016	Dementia	Female	90+	5.5	Thal 1	Braak IV	Absent	N
H21.33.007	Dementia	Female	86	5.6	Thal 4	Braak V	Frequent	N
H20.33.015	Dementia	Male	88	11.4167	Thal 3	Braak V	Moderate	N
H21.33.021	Dementia	Female	90+	6.9	Thal 4	Braak III	Moderate	N
H20.33.005	No dementia	Female	90+	7.6	Thal 3	Braak IV	Moderate	N
H20.33.004	Dementia	Male	86	8.83333	Thal 5	Braak V	Frequent	Y
H20.33.039	No dementia	Female	90+	10.3	Thal 4	Braak V	Frequent	N
H21.33.032	No dementia	Female	90+	5	Thal 2	Braak IV	Sparse	N
H20.33.011	Dementia	Female	90+	6	Thal 5	Braak V	Moderate	Y
H20.33.036	No dementia	Female	90+	10.6	Thal 5	Braak V	Moderate	N
H21.33.042	Dementia	Female	90+	8.1	Thal 5	Braak V	Moderate	Y
H21.33.012	Dementia	Female	90+	5	Thal 3	Braak IV	Sparse	Y
H20.33.016	Dementia	Female	90+	7.73333	Thal 4	Braak IV	Moderate	N
H20.33.030	No dementia	Female	86	6	Thal 4	Braak V	Frequent	Y
H21.33.023	No dementia	Male	90+	7.83333	Thal 0	Braak IV	Absent	N
H20.33.029	Dementia	Female	90+	6.1	Thal 4	Braak V	Moderate	N
H20.33.032	No dementia	Male	90+	6.91667	Thal 5	Braak V	Moderate	N
H20.33.043	No dementia	Male	85	4.5	Thal 4	Braak IV	Sparse	Y
H21.33.039	Dementia	Female	88	6.5	Thal 4	Braak V	Moderate	N
H20.33.035	No dementia	Female	90+	4.6	Thal 0	Braak IV	Absent	N
H20.33.037	Dementia	Female	90+	10	Thal 5	Braak V	Frequent	N
H20.33.045	Dementia	Female	77	3.3	Thal 5	Braak VI	Frequent	Y
H21.33.031	Dementia	Male	84	8.9	Thal 5	Braak V	Moderate	Y
H21.33.028	No dementia	Male	72	8.3	Thal 1	Braak II	Absent	N
H20.33.013	No dementia	Male	90+	4.5	Thal 3	Braak IV	Moderate	N
H20.33.027	No dementia	Female	90+	9.23333	Thal 3	Braak IV	Moderate	N
H21.33.027	Dementia	Male	90+	6.3	Thal 5	Braak V	Moderate	Y
H21.33.003	No dementia	Male	78	10	Thal 0	Braak 0	Absent	N
H20.33.008	No dementia	Female	90+	7	Thal 4	Braak V	Moderate	Y
H20.33.019	No dementia	Female	87	11.1	Thal 4	Braak III	Sparse	Y
H21.33.017	Dementia	Female	90+	3.5	Thal 5	Braak V	Frequent	N
H20.33.038	Dementia	Female	90+	6.2	Thal 4	Braak V	Frequent	N
H21.33.045	Dementia	Female	90+	4	Thal 4	Braak VI	Frequent	Y
H20.33.024	No dementia	Male	90+	3.5	Thal 4	Braak V	Sparse	N
H21.33.009	Dementia	Female	65	6.2	Thal 5	Braak VI	Frequent	Y
H21.33.038	No dementia	Female	84	11	Thal 1	Braak III	Absent	N
H21.33.033	No dementia	Female	83	8.2	Thal 5	Braak V	Moderate	Y
H21.33.034	Dementia	Female	90+	10.8	Thal 5	Braak VI	Frequent	Y
H21.33.030	No dementia	Male	89	5.5	Thal 3	Braak III	Moderate	Y
H21.33.020	Dementia	Male	82	10.8	Thal 4	Braak V	Frequent	N

## Sheet: Supplementary Table S3
	logFC	AveExpr	t	P.Value	adj.P.Val	B	Symbol
ENSG00000198840	1.83705	8.868	5.65707	7.57266e-08	0.000104075	7.58619	ND3
ENSG00000198899	1.83588	8.99384	5.86706	2.73471e-08	6.5086e-05	8.50575	ATP6
ENSG00000241316	1.81539	6.74122	6.41798	1.71261e-09	1.2228e-05	11.0248	SUCLG2-DT
ENSG00000198886	1.67497	9.22856	5.91332	2.17871e-08	6.5086e-05	8.71061	ND4
ENSG00000269028	1.60256	7.77531	5.63122	8.57139e-08	0.000104075	7.47085	NA
ENSG00000269028.1	1.60256	7.77531	5.63122	8.57139e-08	0.000104075	7.47085	NA
ENSG00000269028.2	1.60256	7.77531	5.63122	8.57139e-08	0.000104075	7.47085	NA
ENSG00000198938	1.52313	9.47428	5.15374	7.93263e-07	0.000707987	5.47823	COX3
ENSG00000212907	1.39789	6.91268	5.62701	8.74584e-08	0.000104075	7.46212	ND4L
ENSG00000198888	1.39228	8.13338	4.69678	5.92245e-06	0.00384421	3.66941	ND1
ENSG00000198712	1.39208	9.36716	4.61403	8.41096e-06	0.00428959	3.36219	COX2
ENSG00000156482	1.23269	6.85202	4.73905	4.94292e-06	0.00352925	3.83805	RPL30
ENSG00000082805	1.01837	8.3275	3.94438	0.000122483	0.0267247	0.980642	ERC1

## Sheet: Supplementary Table S4
gene_name	module	kME_CD8T1	kME_CD8T2	kME_CD8T3	kME_CD8T4	kME_CD8T5	kME_CD8T6	kME_grey	kME_CD8T7	kME_CD8T8	kME_CD8T9	kME_CD8T10	kME_CD8T11	kME_CD8T12	kME_CD8T13	kME_CD8T14	kME_CD8T15	kME_CD8T16	kME_CD8T17	kME_CD8T18	kME_CD8T19	symbol
ENSG00000000419	CD8T1	0.190035	0.121933	-0.0499413	-0.0549124	0.130944	0.184464	0.0266651	-0.0217166	-0.0360111	0.0151502	0.0932183	0.144119	0.0494591	0.0333151	0.0719008	-0.0490203	0.113667	0.00863859	0.0180975	-0.0408417	DPM1
ENSG00000167526	CD8T2	0.424222	0.7299	0.0419031	0.0332769	0.046897	0.181453	-0.043393	-0.0960244	-0.016976	0.0435966	-0.024816	0.27037	0.248111	0.139765	0.0594096	-0.194438	0.0692755	0.159728	-0.00724983	-0.128117	RPL13
ENSG00000000460	CD8T3	-0.072821	0.0243545	0.192452	0.0105665	0.014478	0.0983998	0.0242145	0.00240416	0.028907	0.0963089	0.0103878	0.125311	-0.020592	0.115126	0.14166	0.0308945	0.00377975	0.0440416	0.0271866	0.0240746	C1orf112
ENSG00000168685	CD8T4	-0.0975365	0.173144	0.180059	0.651899	-0.0510109	-0.369115	-0.0443826	0.173484	0.0417008	0.114207	-0.548836	0.135428	-0.195111	0.216379	-0.256776	-0.111109	-0.260075	0.0691664	0.253465	0.200474	IL7R
ENSG00000001084	CD8T5	0.0533417	0.0886777	-0.150148	-0.101548	0.181046	0.0219818	-0.126756	-0.114497	-0.130013	-0.162344	0.0592341	-0.0449188	0.0331188	-0.0984843	-0.0857501	-0.0333511	-0.0450794	-0.0536285	0.113773	-0.0732201	GCLC
ENSG00000001167	CD8T6	0.0207332	-0.00015893	0.156145	-0.0202682	-0.0222058	0.105039	-0.00218486	-0.00555982	0.0498539	0.00607323	0.154124	0.037505	0.100682	0.0489421	0.0982962	0.118009	0.0728295	-0.00111602	-0.0648853	-0.0352274	NFYA
ENSG00000001461	CD8T5	0.0818228	-0.0528742	-0.114946	-0.0456926	0.243628	0.15461	0.0245597	-0.0892808	-0.0949904	-0.0557864	0.0442603	0.00597276	0.191743	-0.125001	-0.0397852	-0.0509172	-0.056996	-0.0657755	0.0684754	-0.0208985	NIPAL3
ENSG00000001497	grey	0.0303161	0.00785829	-0.0619653	0.0505359	0.106849	-0.025906	0.161173	0.0349565	0.078162	0.134787	-0.0188705	0.106941	-0.0410398	0.0670279	-0.0345807	-0.00832212	0.0207582	0.156194	0.0582754	0.0738957	LAS1L
ENSG00000229117	CD8T2	0.393804	0.707445	-0.0710617	0.0363215	0.0393745	0.0742503	-0.0550478	-0.111804	-0.0537189	0.0338187	-0.0860296	0.174438	0.181387	0.118361	0.0418907	-0.201885	0.000620497	0.152606	-0.0259456	-0.12092	RPL41
ENSG00000001629	CD8T13	-0.0770431	-0.0347983	-0.00265083	0.0626831	-0.119837	-0.0853865	-0.0117005	0.0150569	0.0349296	-0.0296676	-0.0809828	0.00550597	-0.0311112	0.137905	-0.0403856	0.0805638	0.054128	-0.0158783	-0.0920406	0.0611549	ANKIB1
ENSG00000001630	grey	0.143004	0.0998379	-0.020084	-0.0108987	-0.0718022	-0.0177171	-0.0195976	0.0407412	0.0585656	-0.0411553	-0.0128536	0.0945214	0.00345932	0.0153328	-0.0375572	-0.026051	0.095279	0.207295	0.000826738	0.0381226	CYP51A1
ENSG00000001631	CD8T7	0.0631676	0.0170802	0.073859	0.0988356	-0.021133	-0.00309871	0.141793	0.149352	0.197152	0.1357	0.0400765	0.104484	0.0469777	0.0832008	0.143885	0.0478636	0.146164	0.0832144	0.0474354	0.047407	KRIT1
ENSG00000002016	CD8T8	-0.0731028	-0.0868331	0.0868812	0.0076791	0.041984	-0.0710352	0.0226935	0.186981	0.144212	0.0800138	0.0385142	0.000763935	0.00392308	0.055304	0.0794597	0.146399	-0.0333161	0.0883903	0.0267113	0.0604755	RAD52
ENSG00000002549	CD8T1	0.154515	0.029911	-0.101734	-0.174595	-0.0316163	-0.0324069	-0.00344677	-0.032174	-0.031927	-0.0223922	0.0876862	-0.0769924	0.05601	-0.0203115	0.126328	0.00105677	0.0689633	0.113667	-0.0643288	-0.0590399	LAP3
ENSG00000002586	CD8T6	0.0551947	0.0741019	0.0125041	-0.0844789	-0.0732082	0.0740537	0.0513005	-0.0865942	0.114512	0.0648694	0.0816392	-0.0595536	0.123448	-0.0817513	0.0591842	0.051363	-0.0494433	0.171908	-0.0438052	0.0414993	CD99
ENSG00000002746	CD8T9	-0.0174529	0.0281214	0.0153898	0.00119922	-0.0358414	0.0133522	0.117559	-0.0426703	0.0332417	0.196043	-0.0146823	0.0646183	0.0461428	0.0736359	0.00458923	-0.0162602	-0.020243	0.0786105	0.0196337	0.12517	HECW1
ENSG00000002822	CD8T10	0.0163609	-0.084171	-0.0297347	-0.155875	0.01593	0.0399994	0.0903613	0.00421343	0.110796	-0.0228819	0.21368	-0.124732	0.00237427	-0.0571861	0.0971517	0.0814208	0.120683	0.0594299	-0.0338346	-0.0185651	MAD1L1
ENSG00000002834	CD8T10	-0.0376704	-0.0421716	0.163743	-0.0485453	-0.0445721	0.0265545	0.0444952	0.0445377	0.138007	-0.00906039	0.0710586	0.00817207	0.00726502	-0.0607544	0.0645217	0.144077	0.0921915	0.062081	-0.0270227	0.0650053	LASP1
ENSG00000002919	CD8T11	0.0356243	-0.00953197	0.0522989	0.0581401	-0.0419176	0.0753871	0.0338756	-0.0380506	-0.00322789	0.12249	-0.0766012	0.18781	0.0137413	0.0530496	0.0347861	-0.125272	0.00447197	-0.022822	0.0342504	0.0743299	SNX11
ENSG00000003056	grey	0.0230134	0.144986	0.0389231	0.0330189	-0.0451332	0.0862596	0.121073	-0.011039	-0.0281249	0.0793126	-0.0289638	0.0938481	-0.0190578	-0.0344912	-0.0650021	0.0192543	0.0879251	0.00239572	0.0278247	0.104263	M6PR
ENSG00000003393	CD8T9	-0.0104855	0.107342	0.0481205	0.0623859	-0.0639437	-0.0214941	0.0384051	0.000390516	0.0622788	0.139648	-0.0405308	0.112422	0.0010612	0.102118	0.0550327	-0.130506	-0.00818428	0.0582889	-0.0741124	0.115789	ALS2
ENSG00000003400	CD8T12	0.0435849	0.0342993	-0.0174361	0.0565756	0.0726286	0.0504143	-0.0555994	-0.0969599	-0.00447563	-0.0819406	-0.000606281	-0.0389127	0.122991	0.0155719	0.0563366	-0.0824634	0.00395421	0.00108239	-0.0401131	-0.00256171	CASP10
ENSG00000003402	grey	-0.0522512	-0.0823026	0.115283	0.0228028	-0.057762	0.0499796	0.0335306	0.0938212	0.0954805	0.116068	0.150148	0.05487	0.0315188	0.105706	0.0482547	0.0507832	0.0912319	-0.0525983	-0.0919529	0.0645376	CFLAR
ENSG00000003509	grey	-0.0149786	0.116909	-0.0830389	-0.0305925	-0.0279701	0.0174534	0.0658965	-0.0210294	-0.0469235	0.0582826	0.0102148	0.0275703	0.0273231	-0.0669298	0.00378519	0.0189187	0.0638933	0.106112	0.0459757	-0.0300042	NDUFAF7
ENSG00000003756	CD8T10	0.165694	0.141756	-0.028001	-0.0400822	0.130795	0.119745	0.00551315	0.0461097	-0.0655359	-0.0335586	0.180021	0.00879492	0.144042	-0.0202917	-0.00178697	0.0159067	0.12503	0.0835438	0.10994	-0.133358	RBM5
ENSG00000003987	grey	-0.0428208	-0.0798072	0.159181	0.0283819	0.0479344	0.0533024	0.146808	0.085298	0.0569901	0.0287166	0.116605	-0.00994337	-0.0152033	-0.0854317	-0.0529427	0.14162	0.0247152	-0.020933	0.0920758	0.052424	MTMR7
ENSG00000004059	CD8T13	-0.00905616	-0.00802289	-0.011837	0.0508997	0.094327	-0.00699994	-0.0112818	0.0718428	0.0124787	-0.0811583	-0.0181822	0.0347395	-0.0401292	0.100669	-0.00347347	0.0944732	0.143564	-0.00621707	0.0259098	-0.0090061	ARF5
ENSG00000004139	CD8T14	-0.0703425	0.0501608	0.135182	0.103581	-0.0387205	0.00471074	0.0324796	0.00963091	0.160929	0.197638	-0.0610778	0.0847891	0.06446	0.144161	0.137462	-0.0290832	-0.0433257	0.0550995	-0.0517882	0.0726768	SARM1
ENSG00000150637	CD8T4	-0.282061	-0.0175508	0.284746	0.615598	-0.131834	-0.162473	-0.0152936	0.187184	0.0842357	0.194328	-0.476037	0.155016	-0.151109	0.190142	-0.205176	-0.0630116	-0.22655	-0.170482	0.159932	0.227689	CD226
ENSG00000004455	CD8T15	-0.175294	-0.0522645	0.144666	0.0969759	-0.0867907	-0.0232618	-0.00635048	0.0762483	0.0560914	-0.0953852	-0.0910442	0.0217216	-0.0744109	-0.0524285	-0.0279546	0.264429	-0.016527	-0.0891617	0.026558	0.214479	AK2
ENSG00000004468	grey	-0.0098569	0.00764397	0.124129	-0.0660373	0.0360358	0.228473	0.0508596	0.00174872	-0.0155171	-0.0131648	0.0617718	0.0983681	0.105151	-0.0611799	0.0896552	0.136622	0.0543098	-0.0516811	0.00758791	0.0715957	CD38
ENSG00000004478	grey	-0.0309176	0.0156858	0.0523754	0.0344917	-0.0452895	-0.0474199	-0.0133553	-0.0081482	0.0105916	0.00545066	-0.0754353	-0.0231932	-0.122125	0.00685861	-0.0243485	-0.00678679	0.0213386	-0.0069971	0.000897479	-0.00872505	FKBP4
ENSG00000004487	grey	0.0163809	0.0571508	0.068619	0.0593574	0.0568214	-0.134004	-0.12449	0.081791	0.0222171	-0.0430613	-0.0349901	0.0233378	-0.113614	-0.034182	0.00503853	-0.00548063	-0.105327	0.0342431	0.0313879	-0.0621322	KDM1A
ENSG00000124813	CD8T4	-0.103571	0.135372	0.193165	0.558539	-0.115327	-0.175736	-0.00455354	0.210302	0.0629956	0.0492827	-0.39027	0.104089	-0.212942	0.221715	-0.177326	-0.0983448	-0.157533	-0.0198049	0.134194	0.196492	RUNX2
ENSG00000004660	CD8T9	0.00764765	0.141442	0.10252	0.0906776	-0.0772751	0.00744996	0.0146147	-0.0643274	0.111451	0.137705	-0.102861	0.176968	-0.0127221	0.147393	0.0679523	-0.0182229	0.0260403	-0.000981433	-0.049374	0.0230234	CAMKK1
ENSG00000004700	grey	0.0265757	-0.0231158	0.0317066	0.0582862	0.0219117	0.0653281	0.0319395	0.0684835	-0.132879	-0.0347373	-0.0304251	0.0555222	-0.0448929	0.00121663	0.0551833	0.0857615	0.0233651	-0.0135169	0.0391859	0.0185565	RECQL
ENSG00000004766	CD8T1	0.0356211	-0.0801699	-0.0137495	0.0311398	0.153425	-0.046375	0.0356928	0.092075	0.005517	-0.0281026	0.0525057	-0.000851503	0.0291508	0.0673948	0.0839951	0.0211189	0.0248882	0.140551	0.0583032	0.0473266	VPS50
ENSG00000004779	grey	-0.0984464	-0.0916538	0.0903598	0.0948349	-0.085206	0.0608878	0.0535975	0.0824255	0.112667	0.029827	-0.0797843	-0.0470345	-0.074309	0.0106534	-0.0118715	0.0953406	-0.0091089	0.00251902	0.00835403	0.0786762	NDUFAB1
ENSG00000004864	CD8T6	0.0485398	0.00177959	0.0195258	0.06223	-0.0892369	0.0322256	0.0281377	0.00041256	0.0470503	0.00290253	-0.0332994	-0.0289233	-0.0553109	0.084853	-0.0327057	0.000246565	0.123584	-0.0296222	-0.0848049	-0.04001	SLC25A13
ENSG00000004866	grey	-0.0202601	-0.0295854	-0.0531047	-0.038636	0.00424465	-0.11655	0.0390903	0.0153409	-0.00870175	-0.0583882	0.0612324	-0.0369112	-0.0147521	-0.0740688	-0.0044449	0.0541136	0.0292402	-0.0086717	0.0157631	-0.0314506	ST7
ENSG00000004897	CD8T16	-0.0212561	0.0336534	0.0256597	-0.0421717	-0.0197941	0.0416827	-0.0857984	-0.143576	-0.0864114	0.0439423	-0.0523548	0.0500817	-0.0618575	0.0292187	-0.135073	-0.0632296	0.0724686	-0.049124	-0.0485854	-0.0370316	CDC27
ENSG00000205809	CD8T4	-0.281278	-0.108111	0.133747	0.473983	-0.156091	-0.372364	-0.0126789	0.116873	0.190722	0.0912537	-0.33945	-0.0881527	-0.0600429	0.184275	-0.0388155	-0.0648792	-0.24358	0.154343	-0.03518	0.197598	KLRC2
ENSG00000005007	grey	-0.064922	-0.116433	0.163926	-0.0603944	-0.112224	0.110947	0.190863	0.0213927	0.217096	0.0277215	0.153022	0.0822371	-0.0120878	0.0100892	0.144111	0.18382	0.118353	0.0576695	-0.0327376	0.119207	UPF1
ENSG00000005020	CD8T12	0.108224	0.0593585	-0.0777605	-0.0557628	0.0173897	0.045301	0.120282	-0.00331172	0.070931	0.0287929	0.114762	0.0451079	0.168227	0.160089	0.109257	-0.0237619	0.181071	0.090012	-0.116657	-0.064595	SKAP2
ENSG00000005059	CD8T1	0.164049	-0.0401526	-0.155939	-0.154353	0.069825	0.0394124	-0.00936874	-0.072255	-0.0940886	-0.0364052	0.129438	0.00430685	0.00023627	-0.0331314	0.0575974	-0.0596785	0.124906	0.0471421	-0.0743142	-0.0770118	MCUB
ENSG00000005100	grey	0.0523912	-0.08189	-0.111324	-0.0831978	0.0363499	-0.0392393	-0.0331506	0.144698	0.0233907	-0.104593	0.120549	-0.119514	0.00283101	-0.0157954	0.00293143	0.0868608	0.0362379	0.0578906	-0.0344783	-0.0972127	DHX33
ENSG00000005108	grey	0.0882963	0.0240421	0.0511339	-0.0337941	0.017543	0.0776142	-0.00880895	-0.0386377	0.112509	0.0506548	0.022096	0.0244886	0.0598064	0.0642057	0.0738524	-0.1428	-0.00523009	0.0590511	-0.0800412	-0.0489825	THSD7A
ENSG00000005156	grey	-0.000953848	0.00543428	0.00106461	0.0474786	-0.0219054	-0.0910746	-0.0502899	-0.0342573	-0.053417	-0.104141	-0.0667673	-0.0701266	-0.0184153	0.0220289	0.0377236	0.0046302	-0.0213611	-0.0209425	0.00376156	0.0499922	LIG3
ENSG00000005175	grey	0.0855005	0.107321	-0.166409	-0.0692675	0.0481938	-0.141826	0.00749732	0.03305	-0.175812	-0.0905929	0.0184159	-0.0290694	-0.0182696	-0.0581379	-0.0391944	-0.12011	-0.0471629	-0.00413182	0.0668804	-0.036088	RPAP3
ENSG00000005194	grey	-0.0282534	0.0901806	0.034927	0.105958	-0.0803286	-0.0101488	-0.0372333	0.031499	-0.00239239	0.0659225	-0.130695	0.0831527	-0.0113107	0.0916232	0.00522695	-0.0222859	-0.0193006	0.0558219	-0.00368348	0.0489557	CIAPIN1
ENSG00000233927	CD8T2	0.43778	0.706291	0.0477045	-0.00476938	-0.0549254	0.0936231	-0.111916	-0.179517	-0.0347129	0.0433229	-0.0641249	0.260847	0.160113	0.1845	-0.0453146	-0.244542	0.0899988	0.129174	-0.0262207	-0.152947	RPS28
ENSG00000005249	grey	-0.0231295	-0.0867266	-0.037505	0.027034	0.0309627	-0.0465789	0.0515628	0.0993289	0.263169	-0.0601472	0.0240019	-0.11308	-0.0303418	-0.0594409	0.00429045	0.0908257	0.0301691	0.0920701	0.0800675	0.0842709	PRKAR2B
ENSG00000005302	CD8T6	-0.0222819	-0.0263627	0.001294	-0.096111	0.0584463	0.15108	-0.0288715	-0.0501879	-0.0676214	-0.0446547	0.0669169	-0.0421237	0.0188142	-0.0404226	0.140618	0.0690226	-0.000663732	-0.0652832	-0.0436331	-0.030846	MSL3
ENSG00000005339	grey	-0.032049	-0.0611474	0.0361563	0.00221995	-0.0264752	0.0213989	-0.0267698	0.0748789	-0.0149827	0.0367403	0.0353757	-0.0128817	-0.109169	-0.0114429	0.0332571	0.0641282	0.0544326	-0.0474489	-0.0430743	0.0114002	CREBBP
ENSG00000005379	grey	-0.0655701	-0.0844022	0.12687	0.106731	0.00194608	0.0089065	0.0766403	0.117267	0.0344194	0.142999	-0.0310799	0.0947365	-0.0273319	0.0924295	-0.02725	0.11488	-0.0231817	0.151728	0.0505623	0.127083	TSPOAP1
ENSG00000005436	CD8T6	0.0525979	0.0165583	0.0497427	-0.0629172	0.0565791	0.061219	0.0214785	-0.036363	0.00361403	-0.0176408	0.0679718	0.0375944	0.052221	-0.0249604	-0.0708528	-0.0308221	0.0827271	-0.0328477	0.0399052	-0.00809476	GCFC2
ENSG00000005469	grey	-0.00326689	-0.000966997	0.0333749	0.0209445	0.0698506	0.00402705	-0.00377514	0.032368	-0.129659	0.0400181	-0.00175487	0.094114	-0.00488064	-0.0065299	-0.0241408	0.0931671	-0.0700434	-0.0620359	0.0706088	0.0349401	CROT
ENSG00000005483	grey	0.0162891	-0.0312049	0.0289346	0.0802429	0.179126	-0.0146581	0.0503898	0.0953287	-0.0394636	-0.0925098	0.018802	-0.0549732	0.0521595	-0.0812199	-0.0421074	0.150264	-0.0184523	-0.0046392	0.151398	-0.00803026	KMT2E
ENSG00000105372	CD8T2	0.385296	0.681133	-0.0573911	0.0277742	0.0327944	0.00629353	-0.0798881	-0.1771	-0.0518278	0.0649426	-0.108472	0.156867	0.153273	0.0951199	-0.100374	-0.277964	-0.0585455	0.175682	-0.0301498	-0.140042	RPS19
ENSG00000074966	CD8T4	-0.0869838	0.108015	0.0903819	0.462255	-0.210253	-0.238055	0.0034151	0.0642624	0.0623823	0.11281	-0.448339	0.252989	-0.218704	0.347465	-0.117887	-0.242333	-0.0761116	-0.054589	0.0281024	0.163137	TXK
ENSG00000134545	CD8T4	-0.238142	-0.0433482	0.154454	0.459165	-0.137391	-0.343293	-0.0423615	0.175398	0.156665	0.144696	-0.348876	-0.0531254	-0.0587863	0.200921	-0.0581798	-0.0967568	-0.264738	0.0935856	-0.00709031	0.203864	KLRC1
ENSG00000005810	CD8T10	0.0663635	-0.0228514	0.00395988	-0.174011	0.0890234	0.141376	0.0237809	-0.107758	-0.110779	-0.0500185	0.243019	-0.0723195	0.179198	-0.112372	0.0273904	0.0181224	0.0864133	-0.0810163	-0.0339751	-0.111815	MYCBP2
ENSG00000005812	grey	-0.0572346	-0.010689	0.0377491	0.0300778	0.0191746	-0.0797178	-0.0454122	0.129105	0.0250146	-0.0250735	-0.00528761	-0.160994	-0.0527165	-0.0481674	-0.0115726	0.0876161	-0.0706861	0.100926	0.0818642	0.0154876	FBXL3
ENSG00000005844	CD8T16	0.0469178	-0.0831986	0.0216385	-0.186232	-0.0293062	0.114946	0.0674587	-0.0151218	0.0303138	0.0688943	0.209061	0.0530995	0.0081513	-0.0197769	0.158399	0.0667021	0.212948	0.0124707	-0.0227412	-0.0713177	ITGAL
ENSG00000005884	CD8T8	-0.0475337	-0.0254931	0.0248749	0.102612	-0.11794	-0.105463	-0.0328863	0.0743932	0.109601	0.0406141	-0.0699863	0.00860563	0.0027741	0.0415343	0.108377	0.0492903	0.0349263	0.0428679	0.0575551	0.0816525	ITGA3
ENSG00000005889	grey	-0.0748306	-0.0619091	0.0365021	0.000754826	0.0223226	0.0569342	-0.0330231	-0.0106782	0.0151016	-0.0713301	0.0736034	-0.0517801	0.0385133	0.0164247	0.0624856	0.068588	0.00906329	-0.0889176	0.0482041	0.0511964	ZFX
ENSG00000005893	grey	0.084186	-0.0512316	-0.0990409	-0.0852326	-0.00861808	0.0880399	0.0523884	-0.0423189	-0.0856084	-0.000874568	0.0901564	-0.141607	0.0233351	-0.00135422	-0.0221699	0.0170823	0.10229	-0.0499427	-0.028101	-0.0955543	LAMP2
ENSG00000164300	CD8T4	-0.0535503	0.0292763	0.107243	0.438467	-0.102419	-0.183222	-0.049837	0.0562407	0.048964	0.100839	-0.391573	0.153089	-0.182631	0.27089	-0.126885	-0.175407	-0.0574808	0.0813943	-0.0326733	0.0507421	SERINC5
ENSG00000006015	grey	-0.0460566	0.0441305	0.138145	0.106414	0.0112707	0.0195373	0.00724484	-0.0106928	-0.0272217	0.0280439	-0.102959	0.0252846	-0.0938345	0.00358215	-0.0816801	0.0345899	0.0217311	-0.0679274	0.0210366	0.0941053	REX1BD
ENSG00000006025	grey	0.0569595	0.088266	-0.00425801	0.0501842	0.0993505	-0.0201032	0.0682026	0.0519728	0.0535853	0.0132946	0.00602692	0.00386529	0.0723962	0.101675	-0.0112226	-0.00371533	0.0173043	0.108748	-0.0405632	0.0194825	OSBPL7
ENSG00000006062	grey	-0.0274867	-0.0687488	0.0276824	0.0201731	0.116752	-0.0133185	-0.0788475	0.0346861	0.0272606	-0.161922	-0.036865	0.016052	0.00539151	-0.0313067	-0.0538023	0.0363407	0.00114705	0.00475919	0.0424382	0.0587775	MAP3K14
ENSG00000103489	CD8T4	-0.218527	-0.0402855	0.21272	0.437149	-0.0882995	-0.254632	-0.0213672	0.0909672	0.00714117	0.0141455	-0.264839	-0.064385	-0.140161	0.0747631	-0.189081	0.00312643	-0.145673	-0.017139	0.0857623	0.0786671	XYLT1
ENSG00000006125	grey	0.132757	0.125181	0.103292	-0.0317293	0.0119771	0.12293	0.0164635	-0.0173351	0.0358474	0.0363535	0.119627	0.119008	0.0369151	0.0314901	-0.0524157	0.0333607	0.20231	0.0988656	0.0466673	-0.0545082	AP2B1
ENSG00000006194	grey	0.0380453	0.0794376	0.0456146	-0.015575	0.0100362	0.0189177	-0.0315656	-0.0117501	0.0551827	0.0426815	0.00492238	-0.0156271	0.0933038	-0.0180797	0.0766714	-0.0242278	-0.02456	0.0787883	-0.0775587	-0.0435495	ZNF263
ENSG00000006432	grey	0.0223106	0.112709	-0.00979442	0.0683284	-0.0181432	-0.0505825	0.0457695	-0.0163236	0.0506837	0.0821788	-0.0323852	0.112593	-0.0160395	0.0778245	0.046445	0.0268237	0.049118	0.019882	0.0985611	0.0795684	MAP3K9
ENSG00000006451	grey	0.117698	0.0565845	-0.0530422	-0.022809	0.00668736	0.07622	0.0511898	-0.0460103	-0.120788	-0.0251026	0.044347	-0.0182587	0.1081	0.0447215	-0.0202405	0.000728548	0.0523021	-0.0355333	0.0494496	-0.0972041	RALA
ENSG00000006459	grey	0.0158479	-0.0279148	-0.0833017	0.0383036	0.0677972	-0.0473513	-0.120499	-0.0137782	-0.0386557	-0.211354	-0.064831	-0.0585706	-0.0995873	-0.043926	-0.0458632	0.0560399	-0.0282663	-0.0361846	0.000313845	-0.0271838	KDM7A
ENSG00000006468	grey	-0.0410157	-0.0094874	0.0813394	-0.038032	0.023986	0.04975	0.0918015	-0.0711007	-0.00314276	0.11117	0.0258806	-0.0614906	0.141017	-0.0660457	0.0820442	-0.0172846	-0.000368954	0.0476534	0.0134655	-0.0245896	ETV1
ENSG00000006530	grey	0.0288932	0.0084241	0.0814945	-0.0977414	-0.00858681	-0.0473763	-0.0882257	0.0492673	8.73197e-05	-0.0967322	0.159715	0.0307627	-0.063152	0.045155	0.0600212	0.053489	0.056221	0.0707316	-0.027649	-0.0630286	AGK
ENSG00000006555	grey	-0.0679559	-0.00745557	0.0970811	0.15355	-0.0414654	0.0270903	0.0463907	0.0836031	-0.0279859	0.0306324	-0.0270855	-0.0442946	0.053933	0.0449209	-0.0860846	0.08303	-0.0718822	-0.0734494	0.081637	0.1177	TTC22
ENSG00000006576	grey	0.0558366	-0.0099777	0.0262896	-0.0427778	0.203353	0.0350802	0.0596813	0.171475	-0.0300618	-0.0835104	0.176943	-0.00737585	0.0812284	0.059991	0.0715353	0.0845062	0.0746035	0.0787647	0.0386143	-0.00252613	PHTF2
ENSG00000006607	grey	0.0293348	-0.026262	-0.040542	-0.00557235	0.0256464	0.0954527	0.148002	0.133426	0.0496131	0.0883126	0.107068	-0.0274527	0.0210166	0.110787	0.0939289	0.130419	0.105463	0.0573327	0.0105673	-0.0521413	FARP2
ENSG00000006634	CD8T1	0.0312136	-0.0240535	0.0434408	-0.0324815	0.0858188	0.100991	0.0752357	0.0831662	0.0833198	0.0109997	0.11149	0.00959453	0.0811518	-0.00796122	-0.00792325	0.0634457	0.083551	0.0584936	0.0999272	0.0678675	DBF4
ENSG00000006652	grey	0.0128828	-0.0582816	-0.0417942	0.0215641	0.0320738	-0.0397123	-0.00680604	0.215276	0.0749266	-0.05251	0.06358	-0.134453	0.00350395	-0.122337	0.00082588	0.160755	-0.0151063	0.088168	0.0872084	0.112046	IFRD1
ENSG00000006695	CD8T6	-0.0230056	-0.0433359	-0.0302614	-0.0152115	0.0306731	0.0885429	-0.0600667	-0.0531313	-0.0424731	-0.0103398	0.0367916	-0.00690664	-0.0183823	-0.0411781	-0.066124	0.000203573	0.0430037	-0.0613348	0.108837	-0.0306975	COX10
ENSG00000006704	grey	-0.0948393	-0.0349657	0.0701723	0.0150398	0.0299937	-0.0131795	0.170404	0.0536448	0.079043	0.0821871	0.061159	0.057247	-0.0309424	0.000251287	0.0767226	0.0159988	-0.0522055	0.0358811	-0.0192846	0.160396	GTF2IRD1
ENSG00000006715	grey	0.000512204	-0.0293501	0.075805	-0.065785	-0.114754	-0.0929493	0.0762559	-0.0213203	0.186309	0.0556995	0.0932681	0.0134856	0.0354409	0.0756272	0.0708231	0.0500711	0.0452225	0.125646	-0.0600886	0.0954774	VPS41
ENSG00000006740	CD8T14	-0.025186	-0.0387385	-0.0545084	-0.0474467	-0.0125701	0.0150763	0.043353	0.0784824	0.101051	0.0489828	-0.0178785	0.0125443	-0.0338991	-0.0384955	0.123245	-0.0436458	-0.0381158	0.0635189	-0.0795915	0.105308	ARHGAP44
ENSG00000006744	grey	-0.00136604	-0.0128177	0.0756525	0.0409937	0.0183777	-0.0805099	0.0781498	-0.0183574	-0.00489545	0.097229	0.0459961	0.0810669	-0.0258128	0.118508	0.0103311	0.022388	-0.00998501	0.132471	0.0473686	0.0668624	ELAC2
ENSG00000006831	grey	-0.132998	-0.173055	0.028696	-0.0353785	0.00891097	0.00393162	0.140522	0.0503054	-0.012286	-0.0618053	0.0469704	-0.0290408	-0.0551833	0.0150273	0.0635691	0.19204	0.0550994	0.00759858	-0.0721523	-0.0465019	ADIPOR2
ENSG00000006837	grey	0.0673974	0.00641319	0.0349489	-0.0721753	-0.0901138	-0.0616504	-0.0287608	-0.0120159	-0.0406002	0.0184504	-0.0151167	0.0632129	-0.00272553	-0.0177186	0.0669076	-0.0295991	0.0285707	0.00169451	0.0199884	-0.0601874	CDKL3
ENSG00000007001	grey	-0.0635859	-0.0136422	0.0215668	0.0340681	-0.037603	-0.0229325	-0.0743806	-0.0708531	0.0347387	0.105996	-0.0571673	0.0957452	0.0227604	-0.0109146	-0.0321152	-0.0134288	0.0286144	-0.0657599	0.0220317	0.0175128	UPP2
ENSG00000007047	grey	0.0221646	0.0392946	0.0372133	-0.0773542	-0.00883725	0.154595	0.0784221	-0.0578557	0.075211	0.0678598	0.132411	0.014197	0.00841045	0.0368193	0.125735	0.135576	0.083042	-0.0942951	-0.0191525	0.0941118	MARK4
ENSG00000007129	grey	0.0452403	0.00913888	0.120671	0.0639934	0.00177726	0.114	-0.0135811	0.0184106	0.0351407	-0.00999812	0.0576678	0.00658316	0.132853	0.117568	0.0539898	-0.0808142	0.0330358	0.0136315	-0.0861372	0.0430853	CEACAM21
ENSG00000007168	grey	-0.123811	-0.0834767	0.0508989	0.0592627	0.0139374	-0.0166374	-0.00193034	0.0380535	-0.000704561	-0.0334892	-0.0182256	-0.0424033	-0.0493864	-0.00637192	-0.0793548	0.116672	0.0640513	-0.0970297	0.0358304	0.0305035	PAFAH1B1
ENSG00000007202	grey	-0.0393806	0.026871	0.0258549	0.0646867	-0.0233674	-0.0319295	0.00491267	0.0410086	-0.000496806	0.0814211	-0.0506336	0.000450147	-0.0302201	-0.0253968	-0.0660555	0.00430938	-0.0719572	-0.0760959	0.059839	0.0768792	BLTP2
ENSG00000007237	grey	0.00116865	-0.016926	0.0595022	-0.0360766	-0.027133	0.0473087	0.071052	-0.0872406	0.0301305	0.111693	0.0597503	0.0546514	-0.00569328	-0.00503004	0.0356544	-0.0201662	0.0897129	0.00770747	-0.0996463	0.0247672	GAS7
ENSG00000007255	CD8T13	0.0403872	0.0496552	0.0929903	0.120473	-0.0126487	-0.0403318	0.161205	0.0283248	0.000131869	0.206054	-0.0761685	0.15016	0.0496516	0.214973	0.0526404	0.00608628	0.0604106	0.148484	0.0121581	0.087675	TRAPPC6A
ENSG00000007264	grey	0.142913	0.263802	-0.082909	-0.064537	-0.0310485	0.0563866	-0.139187	-0.145161	-0.0446611	-0.0700777	0.000625475	0.106443	0.0135374	-0.0683183	0.0263128	-0.0474122	0.0230476	0.0385963	-0.0606745	-0.071453	MATK
ENSG00000007341	grey	-0.191579	-0.130386	0.0178197	0.00810376	-0.143418	0.0123241	0.0802099	0.162056	0.0439104	0.0455124	0.020517	-0.0477048	-0.121485	-0.107149	-0.0532693	0.192462	0.00989176	-0.134513	-0.062482	0.204616	ST7L
ENSG00000007392	grey	0.0157283	-0.00237144	-0.000983827	0.00497221	0.0819336	0.048312	-0.0720285	-0.0402804	0.0382844	-0.0709043	-0.014967	0.08667	0.0143382	0.0298471	-0.00419226	-0.0425554	-0.0019574	0.0213144	0.111626	0.029802	LUC7L
ENSG00000007402	grey	-0.0602939	-0.0504206	0.144812	0.0708953	-0.0512152	-0.0285237	-0.0620863	0.067734	0.0894584	-0.0183603	-0.024778	-0.0372281	-0.0610433	-0.028507	-0.0417902	0.0417565	-0.0108548	-0.00326945	0.0251932	0.0320123	CACNA2D2
ENSG00000007541	grey	-0.0202405	-0.00652207	0.0901771	0.0625267	0.0178424	0.0839242	0.151391	0.0938029	0.0283334	0.119058	0.0357546	-0.018478	0.0781222	-0.0165568	0.0250036	0.0873966	-0.0549079	0.0461536	0.0779573	0.145493	PIGQ
ENSG00000007545	grey	-0.0439958	-0.018423	0.141865	-0.0725526	0.00762587	0.0990224	0.108838	0.15234	0.120224	0.0481941	0.216765	-0.00213415	0.0802955	-0.0365805	0.075844	0.206012	0.082826	0.0137135	0.0339802	0.000482718	CRAMP1
ENSG00000007923	grey	0.0457176	0.0467501	-2.60831e-05	-0.00815044	-0.0601581	0.0260104	0.146833	0.0345067	-0.00183112	0.0677694	0.0620022	0.0153284	0.0364803	0.127554	0.0636283	-0.00836605	0.0744932	0.0386328	0.00528826	-0.0166484	DNAJC11
ENSG00000007944	grey	0.119775	0.089608	-0.0736675	0.0951084	0.051496	-0.0590557	-0.115345	0.115357	0.00102956	-0.1368	-0.038215	0.0151785	-0.108031	0.0848497	-0.125119	-0.0465194	-0.0141111	0.0692925	0.135876	-0.0119405	MYLIP
ENSG00000008018	grey	0.108465	-0.0622165	0.016211	-0.0887698	-0.0218312	0.117275	-0.0116935	0.0272045	0.088206	-0.0613533	0.0788789	-0.0275284	0.103544	0.0413054	0.148065	0.113246	0.160426	0.025302	0.0657394	-0.0726121	PSMB1
ENSG00000008056	grey	-0.0466975	-0.0186893	0.00811187	0.088604	-0.0625716	0.00262685	0.109272	0.0756366	0.148121	0.0866121	-0.0321597	0.0566569	0.0508095	0.0696089	0.0700321	-0.068814	-0.00278899	0.0315144	-0.0714103	0.132927	SYN1
ENSG00000008083	CD8T8	0.00852196	-0.0714761	-0.0513137	-0.0645431	-0.00402099	-0.0332969	-0.00479043	0.224808	0.152252	0.00828982	0.028685	-0.0814837	-0.00206056	-0.00359703	0.0707563	0.141867	0.031609	0.161444	-0.0140052	-0.105691	JARID2
ENSG00000008086	grey	-0.0813239	0.000176419	-0.0351591	0.0536757	0.0290657	-0.106251	0.110045	0.0505737	0.0671607	0.0720899	-0.0776491	-0.108121	0.0159704	-0.110238	-0.000548541	0.0191819	-0.0858083	0.125067	0.128115	0.0894029	CDKL5
ENSG00000008128	CD8T12	0.160937	0.124323	-0.0978969	0.0242527	-0.0250072	0.00553429	-0.0226506	-0.0501868	0.0173649	-0.0249889	-0.0258393	0.00113839	0.131401	0.0101413	0.0299353	-0.0757502	0.0129232	-0.0231232	-0.0362858	-0.0132328	CDK11A
ENSG00000008130	grey	-0.0366913	0.0300457	-0.00161807	-0.00294085	0.0519504	0.0983225	-0.0525989	0.0343275	0.0742043	0.0355721	0.00821804	0.0586291	0.106195	-0.0507874	0.177969	0.0953717	-0.122336	-0.0485334	-0.0109593	0.0188278	NADK
ENSG00000008256	CD8T10	0.167263	0.0107329	-0.296234	-0.380889	0.181604	0.0114889	-0.0428219	-0.0589986	-0.0894603	-0.146577	0.303898	-0.116121	0.131589	-0.154883	0.0559012	-0.0777703	-0.00547914	0.1214	-0.0712201	-0.183338	CYTH3
ENSG00000008277	CD8T8	-0.0180195	-0.0769004	-0.0544549	0.0740567	0.000109462	-0.0932654	0.00429389	0.0845256	0.157282	0.0144445	-0.045816	-0.0248534	-0.0564139	0.0846868	-0.0412471	0.0203801	-0.0195016	0.108266	0.115677	0.0624308	ADAM22
ENSG00000008282	grey	-0.099365	-0.0690014	0.0897951	0.135124	0.0169528	0.0461001	-0.0376244	0.0052721	0.0795427	-0.0203975	-0.0739373	0.0768684	-0.0612042	0.0165509	-0.057882	0.113062	-0.0027443	-0.0994284	0.0741095	0.0837339	SYPL1
ENSG00000008283	CD8T10	0.0177376	0.0725263	0.0464051	0.0338114	0.0431394	0.0714076	0.163415	0.0243755	0.0711743	0.152397	0.0457015	0.00554463	0.107127	0.00361742	-0.0870774	0.03402	-0.0304099	0.0299003	0.0951423	0.0403289	CYB561
ENSG00000008294	grey	0.00122993	0.00407903	-0.0771069	-0.0351584	0.071282	-0.153189	-0.0533127	0.0609152	-0.0507032	-0.00404434	-0.0112234	-0.0894997	0.037986	0.00771837	0.0367097	0.0174997	-0.027582	0.0953078	0.0186879	-0.0997375	SPAG9
ENSG00000008311	grey	0.0134207	-0.0272174	-0.0313552	0.0289813	0.0360456	0.0227368	-0.0297339	0.0117082	0.00481874	-0.00919256	0.0492595	-0.0850674	0.00908745	-0.0335775	-0.0722629	0.0308595	-0.00584617	0.0458607	0.0904564	0.0399638	AASS
ENSG00000008324	CD8T3	-0.174882	-0.13638	0.0615878	-0.016699	-0.0433986	-0.0862705	-0.0068727	0.0289469	-0.0392818	0.0342647	-0.0935646	-0.0355767	-0.133722	0.0568494	0.0921999	0.0151647	-0.0652271	-0.0216588	-0.0374484	0.0469587	SS18L2
ENSG00000008405	grey	0.163899	0.0142854	-0.0272268	0.0581547	0.209077	0.102599	0.0425604	0.0690715	-0.00104093	0.0100832	0.0597402	0.0465513	-0.0079632	0.0982442	-0.0391379	0.0318623	0.108603	0.150331	0.153138	-0.0450463	CRY1
ENSG00000008441	grey	0.0850453	0.134478	-0.0424856	-0.0880909	0.0401716	-0.044873	0.0775998	-0.0968004	0.111274	0.216704	0.026199	0.0672525	0.0514806	0.00792324	0.0658741	-0.128381	-0.0699775	0.0783505	-0.0656553	0.0218015	NFIX
ENSG00000153250	CD8T4	-0.214719	-0.112985	0.0446188	0.434743	-0.0163804	-0.14662	-0.034715	0.221325	0.0036597	-0.042632	-0.321863	-0.0472404	-0.193839	0.116918	-0.151041	0.0125919	-0.170028	-0.106208	0.190706	0.180321	RBMS1
ENSG00000177954	CD8T2	0.354076	0.67655	0.0380994	0.0716641	0.0302864	0.144503	-0.0299528	-0.0915516	-0.0501221	0.0744083	-0.0982624	0.323576	0.151394	0.0973996	-0.0318161	-0.158488	0.104149	0.0702668	0.053923	-0.0970422	RPS27
ENSG00000134539	CD8T4	-0.25146	-0.0926354	0.28228	0.430214	-0.229828	-0.0593263	-0.0916529	0.157946	0.0623967	0.0686306	-0.432955	0.162885	-0.290044	0.0926755	-0.161578	0.093872	-0.142079	-0.105208	0.0852604	0.274619	KLRD1
ENSG00000008735	CD8T11	-0.0375847	0.0127786	0.119989	0.0931252	-0.0216628	0.0841584	0.00503629	-0.0349551	-0.0106355	0.093492	-0.127585	0.224551	-0.109291	0.0134396	-0.0596199	-0.0374674	0.0229764	-0.0943421	0.0175201	0.0624699	MAPK8IP2
ENSG00000008838	grey	-0.0299115	-0.0402182	0.0198854	0.0157971	0.0477512	-0.00585451	0.0487315	0.114261	-0.0697763	-0.0641325	0.0886131	0.0510073	0.0306999	0.01927	-0.00861546	0.0664685	-0.0163413	-0.0061948	0.129299	0.0588451	MED24
ENSG00000008853	grey	0.0240363	-0.00873229	0.0218428	0.0742179	0.0819229	-0.0482996	0.0409786	0.117315	-0.0203407	-0.0343984	0.0457011	-0.11967	0.0178892	-0.0874895	-0.076285	0.140933	-0.01928	0.0367805	0.0953494	0.134559	RHOBTB2
ENSG00000008869	grey	0.0882129	0.0898538	-0.0467836	0.0191575	0.0817376	-0.00378327	-0.00214214	-0.0867945	-0.063162	-0.0897577	-0.0113578	0.0454654	0.130218	-0.106443	0.044313	-0.0671415	-0.0872083	-0.0125478	0.020135	-0.0190731	HEATR5B
ENSG00000109906	CD8T4	-0.0537386	0.0896017	0.087374	0.429586	-0.00680504	-0.155467	0.0537771	0.208585	0.0763492	0.0611701	-0.262633	0.0428844	-0.103024	0.201824	-0.178643	-0.057515	-0.101358	0.139769	0.0833409	0.168391	ZBTB16
ENSG00000148303	CD8T2	0.387393	0.663256	0.00217007	0.0425673	0.0185148	0.0798592	-0.0413258	-0.10035	0.0253711	0.0893673	-0.07137	0.209426	0.160403	0.149243	0.0244411	-0.226869	0.0152763	0.243339	0.0209158	-0.104611	RPL7A
ENSG00000009307	grey	0.116671	0.0799179	0.0449809	-0.031202	-0.0235225	0.0742814	-0.0119004	0.0986661	-0.0541439	-0.0600429	0.088756	0.0324505	0.0435076	0.102372	-0.0537511	0.0108191	0.0670604	0.0088645	-0.00330533	-0.0263771	CSDE1
ENSG00000009335	grey	0.112777	-0.00267563	0.0507672	0.0470329	-0.0343649	0.10749	0.0223729	0.104151	0.102458	0.0788771	0.0235791	0.161757	0.0429011	0.151392	0.0439622	-0.0435752	0.094034	0.0284207	-0.0570456	0.00644874	UBE3C
ENSG00000009413	CD8T1	0.191346	0.119643	-0.0890663	0.00947188	0.106229	0.122096	0.0179393	0.0724506	0.0744667	-0.0151013	0.0701359	-0.0391326	0.0594893	0.0415908	0.0521343	-0.0189366	0.135688	-0.0326293	-0.0437239	-0.0997864	REV3L
ENSG00000009694	grey	0.122116	0.0347505	-0.128514	-0.12802	0.0686349	0.00172656	0.0564082	-0.111218	-0.0919982	0.0102898	0.0955789	-0.0553117	0.0938706	-0.00716462	0.00625907	-0.13589	-0.0900544	0.0481299	0.00945594	-0.156285	TENM1
ENSG00000009780	grey	-0.00286959	-0.000722798	-0.0115753	-0.00917659	0.0217365	-0.0773306	0.0226077	0.100655	0.024416	-0.0249156	0.0522165	-0.0958599	0.02862	-0.0355098	-0.0290826	-0.0337147	0.0312794	0.172599	-0.0168013	-0.0206897	FAM76A
ENSG00000009790	CD8T10	0.0299927	-0.0210774	0.0688632	-0.0554773	-0.023037	0.156832	-0.0146464	0.064884	0.0992997	0.00263502	0.134325	0.0145815	0.130669	-0.0317362	0.143735	0.056103	0.133258	-0.0558275	-0.0239089	-0.0472499	TRAF3IP3
ENSG00000009844	CD8T12	0.0693475	0.0371895	-0.0395523	0.0102616	-0.0263906	0.0168376	0.0277387	-0.0207295	0.0741235	0.0672381	0.0728164	0.0326825	0.221974	0.0718474	0.0776907	-0.0177331	0.0104312	0.0364557	-0.0663499	0.130079	VTA1
ENSG00000009954	CD8T15	-0.0576512	-0.0436607	0.106634	0.0120825	0.0235658	0.0527421	0.0742822	0.0992307	-0.00372429	-0.00121314	0.0188123	0.0596921	-0.0642178	0.00179653	0.130058	0.214044	0.0634781	-0.102164	0.0280595	0.124331	BAZ1B
ENSG00000010017	CD8T1	0.0565253	0.0404759	-0.0185764	0.0168718	0.145981	-0.0425947	-0.0802088	0.00561954	0.0138988	-0.0691133	-0.000252702	-0.0140538	0.0517599	0.00828537	-0.0864937	-0.0328894	0.0393982	0.086871	0.10757	-0.0467323	RANBP9
ENSG00000010165	CD8T16	0.14864	0.104954	-0.0027806	-0.0577161	-0.0533748	0.0449246	-0.0395395	-0.0969788	0.0326435	-0.0436534	-0.0117983	0.103079	0.0322504	0.0149666	-0.0262703	-0.0300341	0.173413	0.0253143	-0.0815636	-0.0488212	METTL13
ENSG00000010244	grey	0.0948809	0.187663	-0.0292379	0.0348028	0.0211167	-0.0458981	-0.0752597	0.00781584	-0.129784	-0.0506342	-0.0202918	0.0726327	0.12011	0.0450111	-0.00918738	-0.0626123	0.0297493	0.0655715	-0.0410877	0.00865042	ZNF207
ENSG00000010256	grey	0.0241937	0.109312	-0.00207429	0.0117686	0.117817	0.0234442	0.0267882	-0.039607	-0.0127414	-0.00602526	0.0308371	0.05687	0.0612512	0.0459674	0.0408441	-0.0988337	0.0358124	0.0114726	0.0342077	-0.0753721	UQCRC1
ENSG00000010270	grey	-0.00710119	-0.0306916	0.00442918	-0.0176478	-0.0421115	0.0177317	0.00220861	0.0121823	1.47238e-05	-0.0756316	0.013419	0.0970121	0.0175241	0.0175265	0.00949045	0.129308	0.0547414	-0.0661108	-0.00237718	0.0308939	STARD3NL
ENSG00000010278	CD8T9	0.0162579	0.118446	0.238941	0.0576265	-0.0914913	0.0180036	0.0390628	-0.0706752	0.108031	0.233591	-0.0201709	0.0721924	0.0510455	0.17477	0.101214	-0.00289257	-0.0220216	0.120852	-0.0678495	0.0215568	CD9
ENSG00000010292	CD8T8	-0.00310777	-0.0563813	-0.0107483	-0.00798904	0.0173525	-0.0151051	0.0189169	0.0169121	0.126892	0.0605995	0.0599565	-0.0537498	-0.0220573	0.0907605	0.0624813	-0.00600858	0.0915259	0.116039	-0.0206793	0.091083	NCAPD2
ENSG00000010295	CD8T12	0.154273	0.0763497	-0.163625	-0.100568	0.0542312	-0.0349386	0.203377	0.0489124	-0.0110525	0.0303085	0.115955	-0.139708	0.239958	-0.0588612	0.0470503	-0.0773953	-0.00506374	0.190982	-0.0264505	-0.0374278	IFFO1
ENSG00000196352	CD8T4	-0.152095	0.0488708	0.107839	0.426646	-0.0835663	-0.18666	-0.0337851	0.0837531	0.108079	0.104817	-0.323126	0.0480169	-0.113536	0.137891	-0.17035	-0.0462447	-0.191011	0.0228951	0.159866	0.201076	CD55
ENSG00000010318	grey	0.0979283	0.122518	-0.0516206	-0.0458154	-0.00728599	0.0339098	-0.019658	-0.113207	0.075955	0.0741821	-0.0650882	-0.106964	0.131483	-0.0778808	0.02539	-0.0838658	-0.103646	0.0206843	-0.0487129	-0.0398687	PHF7
ENSG00000010322	grey	-0.039103	-0.00157564	0.252448	0.0920051	0.000691727	0.0504438	0.0725276	0.0515756	0.12271	0.0923771	0.0405202	0.162275	0.0023148	0.112627	0.0236601	0.119559	0.0887812	0.0108134	-0.0239086	0.287433	NISCH
ENSG00000010404	grey	0.04748	0.139493	0.0264198	0.00402237	0.0318185	0.0262379	0.124565	-0.00817228	0.0601854	0.0742547	0.0795967	0.125312	0.141387	0.0767208	-0.0266595	0.0251123	0.0317531	0.00530599	0.0224159	0.125111	IDS
ENSG00000010610	CD8T5	0.175184	0.136311	0.00133719	-0.079784	0.0854765	0.203503	0.0899212	-0.118948	-0.0346189	-0.023333	0.173411	-0.013899	0.197978	-0.116074	-0.00590818	-0.0325327	0.0502487	-0.0353663	0.0710891	-0.0883117	CD4
ENSG00000010626	grey	-0.0293106	-0.0279339	0.00294358	0.000462379	-0.1376	-0.12325	-0.0132612	-0.104747	0.0484155	0.0827688	-0.0261609	-0.0859162	0.0872243	0.0428285	-0.0474083	-0.148612	-0.148961	0.0245831	-0.0846828	0.023321	LRRC23
ENSG00000010803	grey	-0.0545662	-0.0704146	0.072348	0.0955486	0.0505737	-0.0651023	-0.0340813	0.0887284	0.133698	0.0531405	0.00764426	0.000571931	-0.0361944	0.0743146	-0.000616059	0.0153544	0.0678405	0.0534967	0.0152093	0.0505898	SCMH1
ENSG00000010810	CD8T5	0.0729289	0.0399574	-0.26107	0.0372011	0.516733	-0.0724543	-0.083157	0.00185772	-0.172746	-0.087606	-0.00864949	-0.159244	0.0261901	-0.154522	-0.140846	-0.122125	-0.103584	0.0729873	0.186434	-0.106295	FYN
ENSG00000010818	CD8T10	-0.0726443	-0.174928	-0.0744598	0.0540434	0.147813	-0.0327319	0.0642263	0.174479	0.01294	-0.1158	0.112431	-0.138821	-0.0325917	-0.00604897	-0.0260394	0.172791	0.156856	-0.0229158	0.0650305	0.0113045	HIVEP2
ENSG00000011007	CD8T9	0.00305827	0.00328902	0.0688632	0.143719	-0.00267808	-0.00627969	-0.0167923	-0.0585274	0.0134251	0.0591528	-0.120509	0.0677599	-0.0542125	0.133939	0.086325	-0.0708428	-0.0336806	-0.0181541	0.00760615	-0.0573511	ELOA
ENSG00000011009	grey	-0.00872047	0.155741	-0.0279762	0.0302977	0.0310562	-0.0995561	-0.0550787	-0.0152858	0.00529357	-0.038584	-0.0759204	0.0466761	0.0141658	-0.0530205	0.00423495	-0.0192444	-0.0988121	0.0452992	0.0215435	0.0397252	LYPLA2
ENSG00000011021	grey	-0.0281036	-0.00301978	0.0880656	-0.0258282	-0.0176732	0.0481082	0.0135821	0.024285	0.0690634	0.0325949	-0.00332139	0.118832	-0.0643252	0.097613	0.00514764	0.0760481	0.131224	-0.0693536	0.0189085	0.0783578	CLCN6
ENSG00000011114	CD8T7	-0.0175104	-0.078628	-0.0115729	0.0758784	0.0152747	-0.0986495	0.0215141	0.16101	0.133299	0.0235198	-0.0276586	-0.0271275	0.020919	-0.0194607	0.0578182	0.0391822	0.03864	0.0589016	-0.0216842	0.0168404	BTBD7
ENSG00000011132	grey	-0.099592	-0.0665908	0.199395	0.0423164	-0.0142629	-0.0493113	0.0217987	0.0129175	0.199166	0.151041	-0.0154162	-0.0745886	0.0131834	-0.00921615	-0.0353772	-0.0161922	-0.0383499	0.113689	0.00427191	0.113513	APBA3
ENSG00000011198	grey	0.0172297	-0.0605061	0.00300641	0.111962	0.0236106	0.0538268	0.116421	0.0385538	0.0887136	0.0364263	0.0368589	-0.0343091	0.0689859	0.0780145	-0.0592623	0.025694	0.0793465	0.0886011	0.10978	-0.0255209	ABHD5
ENSG00000011243	CD8T3	-0.0493845	-0.0213051	0.215179	0.0997995	-0.140771	0.0371778	0.0862868	0.0926967	0.191129	0.129267	-0.00751584	0.108248	-0.0840733	0.0836667	0.0832721	0.161514	0.0582913	-0.0191559	0.0219364	0.171388	AKAP8L
ENSG00000011258	grey	-0.049855	-0.0432367	-0.0051943	0.0377839	0.0435363	-0.0691904	0.169376	0.091711	0.083868	0.081152	0.0822371	-0.101013	0.103849	0.00811208	0.0447263	0.0340709	0.0192232	0.0251935	0.0144964	0.128251	MBTD1
ENSG00000011260	CD8T3	-0.0308978	-0.0464088	0.174109	0.0515875	-0.0930347	0.0516932	-0.0374912	0.0720634	-0.0550236	0.0142052	-0.0426345	-0.0139867	-0.081221	0.0776468	0.0129455	0.0700209	-0.00268842	-0.0664214	-0.00360199	0.0246367	UTP18
ENSG00000011275	grey	-0.0606256	-0.0440563	-0.0182625	0.0751361	-0.0766817	-0.0629792	0.0218755	0.118742	0.144986	-0.0792483	-0.0433487	0.108181	-0.112414	0.0831644	0.073519	0.0727768	0.0911574	0.0130305	0.109859	0.13757	RNF216
ENSG00000151883	CD8T4	-0.259125	-0.181559	0.0999707	0.41707	0.0535151	-0.22609	-0.200651	0.226559	-0.0254162	-0.108417	-0.292584	-0.0651726	-0.322287	0.0404657	-0.261443	0.030092	-0.225915	-0.0759728	0.171893	0.120588	PARP8
ENSG00000011304	grey	0.062291	0.115051	0.0296186	0.114125	0.0262997	0.082776	0.0296082	0.0143849	0.0925559	0.0405929	-0.0556636	0.118436	-0.00654668	0.108158	-0.0212627	-0.00782928	0.100533	0.0339044	0.105103	0.00235644	PTBP1
ENSG00000011376	CD8T12	-0.039541	-0.0699012	0.0162801	-0.0501934	0.0902414	-0.00620602	0.073791	0.0323037	-0.104719	-0.00297613	0.0980381	-0.0353928	0.090014	-0.0415519	0.0121001	0.0360134	0.0751324	0.019648	-0.0699764	-0.029725	LARS2
ENSG00000180357	CD8T4	-0.267202	-0.131277	0.206025	0.41355	-0.12561	-0.133613	0.0402375	0.166071	0.101797	0.0994556	-0.324902	0.161721	-0.242694	0.147466	-0.0264539	0.130208	-0.010965	-0.0699662	0.107247	0.291584	ZNF609
ENSG00000096060	CD8T4	-0.277383	-0.0980734	0.181928	0.409003	-0.0635333	-0.194604	-0.0255777	0.140238	0.133057	0.0829469	-0.353827	0.151651	-0.262884	0.119274	-0.187263	-0.0385535	-0.124676	-0.0875602	0.0436784	0.219931	FKBP5
ENSG00000011454	CD8T14	0.17293	0.0925718	-0.00435437	-0.0155441	0.0464348	0.00957227	0.00350713	-0.0266831	0.0773988	-0.0469562	0.0419392	0.0678102	0.0873731	0.0732563	0.125909	0.00411114	0.128607	0.152558	0.0456544	-0.0154127	RABGAP1
ENSG00000011485	CD8T10	0.180829	0.0951241	0.064418	-0.0416628	0.0460171	0.129691	0.215042	0.0857883	0.0256872	0.0103012	0.175224	0.00377723	0.156558	0.120651	0.11174	0.0831121	0.159285	0.111516	0.0538414	-0.0845337	PPP5C
ENSG00000011523	grey	-0.0528355	-0.0161184	-0.0493561	0.0507906	0.0271056	-0.0824576	-0.0757811	0.0169065	0.0067477	-0.00203438	-0.139241	-0.0217931	-0.118838	-0.0661696	0.057504	-0.0484248	-0.0505982	8.862e-05	0.0953915	-0.0461271	CEP68
ENSG00000011566	grey	-0.209101	-0.145597	0.0261059	0.019771	-0.157778	-0.0533505	0.058483	0.04849	0.169058	0.118222	-0.0594265	-0.0276609	-0.0432997	-0.0487632	0.0327782	0.0109774	-0.0633806	0.0392428	-0.00407123	0.0246105	MAP4K3
ENSG00000012061	CD8T6	0.042811	0.0499733	-0.0602899	-0.136834	0.0104034	0.189782	-0.057749	-0.182515	-0.0894461	0.0544339	0.0583851	0.015775	0.103302	-0.099581	-0.0600331	-0.133826	0.0714383	-0.134429	-0.0806008	-0.146327	ERCC1
ENSG00000012232	grey	-0.00629475	-0.0306495	0.0996573	0.136328	-0.0493853	-0.0415666	0.1182	0.116075	0.0659055	0.0472612	0.0083495	0.0229752	0.0357157	0.03947	-0.0243249	0.0218076	0.0326588	-0.0128649	0.146965	0.111947	EXTL3
ENSG00000012660	grey	-0.0615689	-0.136949	0.0811953	-0.0324351	0.0796955	0.0640983	0.0606483	0.163363	0.0542798	-0.00568719	0.126757	-0.0193144	-0.0552706	-0.104724	0.0274669	0.184276	0.0193587	0.0500387	0.0640168	0.0431044	ELOVL5
ENSG00000012779	grey	0.00950591	-0.0614943	0.0216574	0.0519879	0.0249366	0.119357	0.356441	0.0950087	0.0536615	0.098654	0.140718	0.0209223	0.111883	-0.0152457	0.0344912	0.151967	0.129967	-0.0681282	0.0916794	0.0648653	ALOX5
ENSG00000012817	CD8T1	0.0577241	-0.0565234	-0.106644	-0.0580456	0.0525968	-0.0687006	0.0399998	-0.0133795	0.0313852	-0.0725982	0.0893886	-0.0372883	0.0465559	0.0784067	0.0855462	0.02995	0.0487123	0.131157	-0.0385245	-0.0824499	KDM5D
ENSG00000012822	CD8T1	0.178696	0.0755057	0.0178828	-0.0260839	0.0713924	0.0485556	-0.0198288	0.0201387	0.00356294	-0.022924	0.0483205	-0.0225232	0.0937239	0.0474633	0.0909695	0.0202552	0.10478	-0.0037141	-0.0101016	-0.0733766	CALCOCO1
ENSG00000012963	grey	0.0854647	0.120851	0.0127304	0.00679327	0.0376583	0.0278186	-0.0667156	-0.0109328	-0.0718471	-0.0479302	0.0143196	-0.0600967	0.0321005	-0.0155452	-0.0393366	0.00298321	-0.018686	-0.0629089	0.0245794	-0.105964	UBR7
ENSG00000012983	CD8T16	0.0105066	0.0124277	-0.0146576	0.004732	-0.015437	0.0542865	-0.012088	-0.065609	0.0369614	0.0352413	0.0357349	0.0220754	0.00461157	-0.00151293	0.0297621	0.0190823	0.187868	-0.0677205	0.0123546	0.0121992	MAP4K5
ENSG00000137818	CD8T2	0.395188	0.660636	-0.0722135	-0.00581505	0.0684949	0.110876	-0.1222	-0.135802	-0.124493	-0.0558481	-0.0514937	0.260547	0.178641	0.0936387	0.00376548	-0.18984	0.0494838	0.0401765	0.0572429	-0.0886198	RPLP1
ENSG00000013288	CD8T12	0.0822729	0.0536157	-0.00489638	-0.0576997	0.157078	0.156942	-0.00921981	-0.100329	-0.0673005	-0.0302867	0.0784252	-0.040216	0.191057	-0.0602275	0.00560181	-0.05913	-0.0829908	-0.0158784	-0.0598627	0.0138111	MAN2B2
ENSG00000013306	grey	-0.0285934	-0.0430277	0.07705	-0.0154731	0.0449589	0.158566	0.0361971	-0.0207411	-0.0253733	0.0140364	0.115819	0.0784305	0.0235608	0.0564052	0.134301	0.123289	0.0710592	-0.0877499	-0.00248929	0.0183794	SLC25A39
ENSG00000108107	CD8T2	0.472641	0.639891	-0.0322854	-0.0482738	-0.0184585	0.134343	-0.064107	-0.137548	-0.0633234	-0.0135472	0.0215419	0.224026	0.167693	0.122247	0.0216562	-0.189219	0.0507707	0.157384	-0.0358617	-0.179715	RPL28
ENSG00000013374	CD8T12	0.0482053	0.0436899	0.00658281	0.00438283	-0.00965785	0.00543844	-0.00229031	-0.0283165	0.000673409	0.0812818	-0.0168144	-0.0719425	0.198668	-0.000683389	-0.104105	-0.0913202	-0.128332	0.034067	0.0506935	-0.0178102	NUB1
ENSG00000013375	CD8T15	-0.0357433	-0.0184479	0.0988487	-0.0477904	0.017328	0.0554166	0.0239853	0.0530425	0.0929219	-0.00914551	0.105928	0.0810292	0.0121035	0.024745	0.00245385	0.130401	0.0125711	0.00626294	0.0418375	0.0229806	PGM3
ENSG00000013441	CD8T7	0.0262562	0.00967189	-0.0358732	0.147273	0.0106868	-0.108937	0.0448232	0.252899	0.12074	-0.0675497	-0.0627848	0.00444788	-0.0386635	0.099439	0.0313175	0.0752458	0.0348031	0.179484	0.113709	0.0947999	CLK1
ENSG00000013503	grey	-0.0311509	-0.0625528	-0.0257267	0.0201655	0.0585845	0.0698148	0.0413548	0.110238	0.0418558	0.091631	0.113345	-0.00868796	-0.0441764	0.00561086	-0.0270066	0.124257	0.0059428	0.00895863	0.0858571	0.0307359	POLR3B
ENSG00000013523	grey	-0.0370015	0.00216139	0.0949938	0.0131627	0.0116357	-0.0189894	-0.0750343	-0.0865527	-0.00394187	0.0176991	-0.0551253	0.0819797	-0.0993611	0.0356747	0.0146045	-0.0718624	-0.0255809	-0.0430198	-0.0480458	0.0113015	ANGEL1
ENSG00000013561	grey	0.0168287	0.0501085	0.135951	0.00373647	-0.0409126	0.0235269	0.0198582	-0.0989033	-0.0208152	-0.0641112	0.0206622	0.094322	0.0661196	-0.0358913	0.101489	0.0535403	0.0791135	-0.0107461	-0.00114435	0.00351789	RNF14
ENSG00000013573	grey	-0.0508619	-0.0840297	-0.0124936	-0.0025752	0.00666223	-0.0213848	0.033493	-0.0193911	-0.0962584	-0.0402512	-0.0837923	-0.0879671	-0.0717992	-0.040397	-0.213235	0.0585034	-0.0519375	-0.0466126	0.0409078	0.0335607	DDX11
ENSG00000013619	CD8T14	-0.0633842	-0.0519216	-0.0473368	-0.0819307	0.0522395	0.0494775	-0.0877355	-0.0560529	-0.00337983	0.0687855	0.0346527	0.0210591	-0.0214756	0.029682	0.115931	-0.0121801	0.0702508	0.0155893	-0.0423529	-0.0721219	MAMLD1
ENSG00000013725	CD8T6	0.0694164	0.0264699	0.160549	0.0204502	0.0128437	0.160539	0.0426129	0.0928965	0.0676559	0.108194	0.0441674	0.0470765	0.0831375	0.0620173	0.0420399	0.0996349	0.0395663	-0.0320107	0.021427	0.0103891	CD6
ENSG00000013810	CD8T11	-0.00422822	0.025736	0.0182628	-0.0513158	-0.0153306	0.132056	0.0867223	-0.047251	-0.0206526	0.138399	0.040445	0.128619	0.031273	0.00482089	0.00338559	-0.00512637	0.0272557	-0.0624832	-0.0305958	0.0986963	TACC3
ENSG00000014123	grey	-0.0167812	-0.0506012	0.0801635	0.0424724	0.0366577	-0.012758	0.048207	0.06265	0.00348821	0.0589141	0.00952411	-0.0181904	0.0367162	-0.00791369	0.00734529	0.0383304	0.0452895	-0.0302039	-0.0112638	0.0789595	UFL1
ENSG00000014138	grey	-0.0494096	-0.0150681	0.0595906	0.0188207	0.000684727	0.0642276	0.128158	-0.0529052	-0.0512698	0.0698368	0.0336162	0.0224276	0.0429247	-0.00345518	0.0555125	0.0290442	0.0376166	-0.00724051	-0.0669178	0.0197407	POLA2
ENSG00000014164	grey	0.115408	0.0124598	0.113161	-0.0706965	-0.0260643	0.0776272	0.0580901	-0.00699993	-0.00280025	0.0130701	0.123805	0.0507286	0.19214	0.0451691	0.0311408	0.0231739	0.190297	0.0228669	-0.0327402	-0.0286979	ZC3H3
ENSG00000014216	grey	0.026581	0.109413	-0.00967809	-0.0342033	-0.00144587	0.125183	0.186641	-0.105169	-0.0035253	0.0941531	0.0702218	0.0827989	0.0677594	0.0243524	0.058244	-0.0294053	0.0157719	0.0253655	-0.0397546	0.0417083	CAPN1
ENSG00000014641	grey	0.135516	0.0610957	-0.050781	0.0195521	0.0166256	-0.0375659	0.0686033	0.032546	-0.053949	-0.0504562	0.00763911	0.0519711	0.0842166	0.0773176	-0.0234124	0.0310438	0.0206086	0.122357	0.0137966	-0.00425696	MDH1
ENSG00000014824	grey	-0.0301636	-0.0500755	0.00954491	0.0608466	-0.000872792	-0.00860207	0.0625109	0.0521139	0.0516255	-0.029651	0.0232879	-0.0842416	0.0464003	0.096202	-0.0778565	0.0276359	-0.00270672	-0.002863	-0.058355	0.0401026	SLC30A9
ENSG00000014919	grey	-0.0201555	-0.0389922	0.0391689	0.0573099	-0.0387729	0.0418253	-0.00422571	0.0125033	0.020695	-0.0182207	0.0268791	0.0536526	0.0111557	0.0641214	-0.00410006	0.112495	0.0681479	-0.0556639	0.0230394	0.0257879	COX15
ENSG00000015133	CD8T10	-0.0420461	-0.215544	0.0346949	-0.0787963	-0.00170931	0.185553	0.000490867	0.0181856	-0.0856241	0.00826064	0.118614	-0.0355047	-0.0619495	-0.0585131	0.0788629	0.164389	0.220254	-0.190426	0.0268141	0.0348284	CCDC88C
ENSG00000015153	grey	-0.0362407	-0.00950373	0.0346594	0.0175994	0.00226036	-0.0871644	0.107462	0.0654415	0.0590688	-0.0195184	0.0242903	0.061295	0.01042	-0.0147873	-0.00302053	0.0437343	-0.0751274	0.11816	0.0241413	0.130988	YAF2
ENSG00000015171	CD8T16	0.124437	0.0680205	-0.0933371	-0.0677904	0.078064	0.0442514	0.0700317	-0.0159378	0.0512974	-0.182556	0.115237	0.0362373	0.101752	0.0968721	0.00179647	0.0164715	0.227042	0.0447015	-0.0620455	-0.0332551	ZMYND11
ENSG00000015285	grey	0.0716281	0.126816	-0.0696201	-0.00460251	0.056478	-0.0536699	-0.0655274	-0.0361588	-0.121861	-0.0333589	-0.0720878	-0.0298148	0.00881161	0.0169083	0.000494414	-0.122319	-0.101351	-0.00210251	0.00293263	-0.14035	WAS
ENSG00000015475	CD8T13	-0.005634	-0.0787801	-0.0672469	-0.0565994	0.000178644	-0.0354871	0.0246775	-0.0234936	0.0545522	-0.0346335	0.02178	0.0251938	0.0428049	0.05699	0.0548625	-0.0558954	0.0099703	0.0150108	-0.0359613	-0.00127587	BID
ENSG00000154814	CD8T4	-0.0920799	-0.0167338	0.218941	0.403568	-0.110819	-0.140088	-0.0383816	0.181672	-0.00696034	-0.0378779	-0.260518	0.0888932	-0.181847	0.124999	-0.139045	0.111328	-0.0569594	-0.0315425	0.208617	0.169666	OXNAD1
ENSG00000015532	grey	-0.0787413	0.0067853	0.15758	-0.0396127	-0.0705404	0.0917023	0.0257292	-0.0320433	0.0130026	0.0835254	0.0301085	0.118438	-0.102198	-0.0269982	-0.0361227	0.106206	0.0392947	-0.0348104	0.000350087	0.102976	XYLT2
ENSG00000015676	grey	0.0324496	0.0702277	0.125299	0.105465	0.0609461	-0.0035151	0.16525	0.0487664	0.0495219	0.184323	0.0707587	0.0438803	0.0455837	0.214418	0.000933475	-0.0226635	0.0628428	0.078839	0.065147	0.0638434	NUDCD3
ENSG00000016864	CD8T16	0.0561207	0.0722381	0.0433495	-0.0061042	-0.00351	-0.013923	0.0314078	-0.0154987	0.0444	-0.00451564	0.00143543	0.0667646	-0.0546059	0.0323818	0.11006	0.000631758	0.0891238	0.063433	-0.0527442	-0.0116364	GLT8D1
ENSG00000017260	grey	0.0271798	-0.0489776	0.0916042	-0.102303	-0.0513299	0.219291	0.129522	-0.0290393	0.0479964	0.122766	0.223968	0.0410325	0.0524071	0.02273	0.0766074	0.130496	0.245315	-0.0615507	-0.11647	0.0496908	ATP2C1
ENSG00000017797	CD8T17	0.0852292	-0.0119589	-0.00282657	0.078393	0.0146881	0.0194157	0.0128807	0.0325665	0.0818634	0.0531813	0.0246755	-0.0379669	0.0027563	0.0942706	-0.0460963	-0.0679467	0.0808955	0.119623	0.0166269	-0.0658928	RALBP1
ENSG00000018189	grey	0.0106592	-0.0265161	0.00554104	-0.00920143	-0.0129517	0.0749432	0.0212347	0.0116288	0.0523988	0.0473172	-0.0334762	-0.0149589	-0.0418204	-0.0214162	0.0205621	0.0532975	0.0460104	-0.0372058	-0.0400744	0.0865215	RUFY3
ENSG00000018236	CD8T11	-0.0228379	-0.0631103	0.199975	-0.000481462	-0.13751	0.0480471	0.226372	0.0897792	0.208051	0.285334	0.0416685	0.244078	-0.0741364	0.197581	0.152105	0.00625865	0.103468	0.0512972	-0.00930768	0.195468	CNTN1
ENSG00000018510	grey	-0.116969	-0.108777	0.120767	0.0689347	0.00064767	-0.06298	-0.00363717	0.0534227	-0.008172	0.162453	-0.00137748	0.0101861	-0.0555476	0.124168	0.102832	0.0420186	-0.069071	-0.0465141	-0.027911	0.0725609	AGPS
ENSG00000018625	CD8T8	0.0428597	-0.00111684	-0.0396422	0.0836225	-0.00412859	-0.0734268	0.0152159	0.00643225	0.0608972	0.0538563	-0.0889526	5.09462e-05	-0.0600302	0.0530128	0.0410569	-0.126882	-0.0170858	0.0430199	-0.01655	0.0745693	ATP1A2
ENSG00000018699	grey	0.00419476	0.0452623	0.254952	0.0529005	-0.0548811	0.0371471	0.0863387	-0.028745	-0.0570129	0.183375	0.0344991	0.13229	0.0356458	0.0772761	0.0115647	0.039689	-0.0185992	0.0266693	-0.0723955	0.00656323	TTC27
ENSG00000019485	grey	0.0440876	-0.0278282	0.00314281	0.0134651	-0.00464802	0.0594518	0.140841	0.0191779	0.0503616	-0.00700086	0.105353	0.00468504	0.0277986	-0.0439157	0.0268204	-0.00652975	0.0338878	-0.0604024	0.0428952	0.130511	PRDM11
ENSG00000019582	CD8T10	0.248329	0.129852	-0.160596	-0.268772	0.191084	0.132635	-0.041709	-0.151026	-0.122326	-0.0490551	0.301356	-0.0483563	0.253944	-0.174028	-0.011057	-0.0899134	0.0296385	0.0195801	0.0352885	-0.218351	CD74
ENSG00000019995	grey	-0.0402254	-0.00852867	0.016546	0.102491	-0.0319053	-0.142696	0.00813905	0.0833987	0.00260229	0.0129488	-0.075635	0.0470117	0.0147122	0.0456866	0.0599548	-0.0447241	-0.00781339	0.0475284	-0.0820866	0.0363607	ZRANB1
ENSG00000020129	CD8T13	-0.0474881	-0.0640248	0.132042	0.0973589	-0.0996588	-0.111017	0.134063	-0.0153953	0.154339	0.250627	-0.0703463	0.125214	-0.0449057	0.235551	0.0709964	-0.0273486	0.00121822	0.129184	-0.0799659	0.146949	NCDN
ENSG00000020256	CD8T9	-0.0626294	-0.102802	0.0188459	0.0941932	-0.0517274	-0.0381899	0.0764635	0.022757	0.0418935	0.120938	-0.0777311	-0.0565072	0.0156555	0.107961	-0.0276953	-0.107773	-0.0157296	0.0932585	-0.0716914	-0.0209684	ZFP64
ENSG00000020426	CD8T13	0.00142541	0.0456523	0.0461772	0.123545	-0.0876602	-0.120944	0.0297214	0.0349645	0.0841	0.0818338	-0.147659	0.00289555	0.0123415	0.107903	-0.0088397	-0.0277215	-0.0431242	0.0366543	0.0765022	0.0527857	MNAT1
ENSG00000020577	CD8T6	0.0270054	0.0261501	-0.0200212	-0.0291166	0.0439478	0.0893759	0.0736938	-0.108496	-0.0264936	0.0127903	0.0774661	0.0139801	0.0692316	-0.0135393	0.0387999	-0.0165825	0.0381794	0.0252533	-0.00508021	0.029961	SAMD4A
ENSG00000112297	CD8T4	-0.178633	-0.00614875	0.029418	0.400886	0.0231121	-0.174473	-0.091459	0.111234	0.014751	0.0319242	-0.273037	0.124979	-0.223018	0.13026	-0.200944	-0.131992	-0.14764	-0.0185842	0.0790028	0.138606	CRYBG1
ENSG00000020922	grey	0.126687	-0.0465622	0.0254342	0.0269116	0.118876	0.0441022	-0.000659706	0.112048	-0.0429432	-0.0691812	0.0785447	-0.0187471	0.0711705	0.0359629	-0.0696492	-0.010731	0.0568117	0.111454	0.0490079	-0.0575412	MRE11
ENSG00000021355	grey	0.0554584	0.0146386	-0.0229977	-0.00658388	-0.0215093	-0.107446	-0.0887531	-0.0405872	0.0891916	-0.0361505	-0.00211919	0.057645	0.00790492	0.10602	0.0400527	-0.067468	-0.0102432	0.0698844	0.0226158	-0.0697656	SERPINB1
ENSG00000021574	grey	-0.0982067	-0.028619	0.0358124	0.0429214	-0.0882458	-0.038299	0.0347983	0.00285239	-0.0195227	0.131895	-0.0513254	0.0652134	-0.0399348	-0.00718551	-0.0412229	-0.0215102	-0.00232015	-0.0666053	0.0476389	0.0467966	SPAST
ENSG00000021645	grey	-0.0920839	-0.142529	0.17219	0.0249175	-0.197925	-0.00718002	0.209709	0.106544	0.251076	0.258762	0.00998873	0.10245	-0.0506452	0.105119	0.147641	0.0751261	-0.0407012	0.16463	-0.0349342	0.237828	NRXN3
ENSG00000021762	CD8T9	-0.00986791	0.0900702	-0.0324797	0.0665539	0.00181894	0.00866196	0.0605385	-0.0668972	0.0200351	0.147519	-0.0549115	0.0558685	-0.0383775	0.0225811	0.115646	-0.0233922	-0.0189109	-0.0593324	-0.0406569	0.0576172	OSBPL5
ENSG00000021776	grey	0.0519703	0.0424375	0.0793184	-0.0761068	-0.0644521	0.10699	0.0866829	-0.164004	-0.00695901	0.0756919	0.0797401	0.099911	0.166348	0.0767941	0.012525	0.0478598	0.0572711	0.0149225	-0.0585916	-0.0438043	AQR
ENSG00000022267	grey	-0.0414947	0.04099	-0.00332917	-0.0532433	0.0915338	-0.0680299	-0.0765423	-0.0722369	-0.0550048	-0.0058638	0.0186779	0.0186481	0.010339	0.00958084	-0.0477601	-0.107174	0.0121335	0.0420833	-0.00202658	-0.141918	FHL1
ENSG00000149273	CD8T2	0.316308	0.627086	0.00779227	0.0373901	0.0137943	0.0387345	0.0153765	-0.0491584	-0.00360126	0.121801	-0.0415866	0.147792	0.160184	0.0947621	0.0017704	-0.151716	-0.0805456	0.1286	-0.000644416	-0.129251	RPS3
ENSG00000022355	grey	0.0449169	-0.0405645	-0.0704305	-0.0537729	0.00619709	-0.04242	0.0222893	0.0444556	0.0599602	0.015325	0.151442	-0.0612114	0.0506217	0.0571795	-0.00214934	-0.0279598	-0.0176511	0.154802	-0.0925539	-0.0290266	GABRA1
ENSG00000022567	grey	0.0317595	-0.0691827	-0.0870477	0.0556442	0.106267	-0.0218398	0.16513	0.204342	0.119952	-0.015539	0.0612972	-0.0256519	-0.0376295	0.127422	0.0205912	0.119852	0.1171	0.135162	0.129912	0.099738	SLC45A4
ENSG00000022840	CD8T18	-0.0402355	-0.0613315	-0.00380589	-0.000205162	-0.0425166	0.0393566	0.0282064	0.129351	0.0532945	-0.018122	-0.01821	0.0980531	0.0100335	-0.0443002	0.107545	0.145066	-0.0152694	-0.0500803	0.108847	0.0639896	RNF10
ENSG00000022976	CD8T18	-0.17646	-0.185097	0.0132892	0.10864	0.132264	-0.0443165	0.0517072	0.144498	-0.0094991	-0.0827524	-0.0135304	-0.06065	-0.0989208	-0.0752718	-0.177633	0.207061	-0.147415	-0.0587083	0.353119	0.0757464	ZNF839
ENSG00000023041	CD8T10	0.154573	0.00300766	-0.153538	-0.108334	0.102684	0.182477	0.0238192	-0.0712623	-0.0406046	-0.0684745	0.192476	-0.103067	0.130214	-0.0223502	-0.0166747	-0.0677996	0.155417	-0.0762248	-0.0218753	-0.130588	ZDHHC6
ENSG00000023171	grey	-0.0680989	-0.054046	0.147917	0.161354	-0.0126119	0.0982806	0.0983736	-0.0262376	-0.0558895	-0.0542609	-0.122933	0.0528274	-0.110281	-0.0375965	-0.12955	0.102445	-0.0419277	-0.206972	0.130011	0.170366	GRAMD1B
ENSG00000023191	grey	-0.03087	-0.0459079	0.00833369	-0.000611728	-0.0842715	0.0406831	-0.0700002	-0.0931208	-0.0490182	-0.0475988	-0.0487684	0.0466678	-0.11342	0.0186665	-0.052637	-0.0462465	0.022373	-0.0390559	-0.0538374	0.0206645	RNH1
ENSG00000023228	grey	-0.0610539	-0.0786745	-0.016966	-0.0151247	-0.0189618	-0.076004	0.0379429	0.0349271	0.011549	-0.0144614	0.0308628	0.00870697	-0.0450207	-0.0282423	-0.068155	0.0551091	-0.0199986	0.00907454	0.0303237	0.0530349	NDUFS1
ENSG00000023287	grey	0.00717934	-0.0522084	-0.00801659	0.112837	-0.100484	-0.147381	0.0355262	0.16194	0.15413	-0.0307809	-0.0656454	0.0391229	-0.0693946	0.123269	-0.00285033	-0.0249463	-0.00305516	0.158759	-0.0696417	0.0535267	RB1CC1
ENSG00000023318	grey	0.108528	0.0204251	-0.0655417	-0.020025	0.0309288	0.101119	0.0258279	-0.0345105	-0.0396409	-0.0233459	0.133797	0.0495479	0.173446	-0.000149648	0.0640381	0.0512648	0.151454	-0.0562619	-0.0407229	0.0703992	ERP44
ENSG00000100316	CD8T2	0.426805	0.618332	-0.0903211	-0.0452814	0.0510064	0.042325	-0.0918337	-0.169489	-0.14881	-0.0330569	-0.0226671	0.178105	0.201011	0.0489442	-0.0436677	-0.312464	0.0570946	0.11673	-0.00434803	-0.212279	RPL3
ENSG00000023445	grey	0.0785559	0.0932807	-0.074119	-0.00566011	0.0375601	0.00744957	0.0504153	0.000573006	-0.142613	-0.0345706	-0.0064151	0.117832	0.0348836	0.0730449	-0.0824143	0.0293736	0.0487809	-0.0390417	-0.0350277	0.0416018	BIRC3
ENSG00000023516	grey	0.0531842	-0.00111696	0.0609742	-0.0650304	0.0243803	-0.0340825	0.00854508	-0.0283545	0.159444	0.00197305	0.0580121	-0.0293546	0.085974	0.0945266	0.123305	0.0287837	0.0838891	0.0709249	-0.0709972	0.00928113	AKAP11
ENSG00000023572	grey	-0.00728039	-0.0274075	0.100706	0.0245185	-0.0973696	0.00301047	0.0477757	0.131207	0.0745319	0.0794008	0.0453717	0.0669732	-0.048869	0.118518	-0.0409119	0.0613255	0.0337386	0.0443642	-0.0704162	0.103641	GLRX2
ENSG00000196782	CD8T4	-0.134454	-0.0440313	0.0523472	0.397091	-0.085242	-0.215101	0.0300159	0.198016	0.0495602	-0.0173959	-0.351882	0.0243983	-0.245904	0.0979554	-0.178219	-0.0502182	-0.105993	0.00896558	0.0896239	0.0545342	MAML3
ENSG00000023697	CD8T13	0.0131621	-0.0555248	-0.0744953	0.0866817	0.00878147	-0.10966	-0.110806	0.0193387	-0.0232714	-0.101251	-0.0987918	-0.0151166	-0.0829311	0.0660796	0.0110325	-0.0408022	0.0213689	0.0425745	-0.0134221	-0.0704327	DERA
ENSG00000023734	CD8T6	0.00364632	0.0361727	-0.00511401	-0.0861069	-0.0475473	0.163558	-0.0671106	-0.0904096	-0.0591307	-0.0612697	0.0276167	0.0239104	-0.00579855	-0.104178	0.0798097	0.00623763	0.0703989	-0.110429	0.0206819	-0.0343602	STRAP
ENSG00000113319	CD8T4	-0.185592	-0.00678831	0.140768	0.386774	-0.166597	-0.140594	-0.062564	0.0817941	0.0563839	0.0806991	-0.408439	0.104993	-0.251199	0.176484	-0.132469	-0.0391357	-0.146023	-0.0566063	0.0452869	0.23574	RASGRF2
ENSG00000023902	grey	0.0165733	0.0682929	0.0296114	-0.0104334	0.0537029	-0.0141843	0.0280074	-0.0292649	-0.125031	0.0108157	0.0467189	-0.00936225	0.0581833	-0.0154174	-0.103276	-0.108531	0.0125724	0.000614458	-0.0946046	0.0207118	PLEKHO1
ENSG00000023909	grey	-0.0342995	-0.0324793	-0.196285	0.0658882	0.086376	-0.0552745	0.0068215	0.0627089	0.0143821	-0.0570118	-0.0470828	-0.18173	-0.0445442	-0.0271959	-0.101019	-0.0177726	-0.0324865	-0.0378319	0.108327	-0.0348474	GCLM
ENSG00000024048	grey	0.0708756	0.0031458	0.0788104	0.0278064	0.0954928	0.035074	-0.0435474	0.053382	0.176024	0.050947	0.10566	0.013997	0.0605727	0.0492104	0.10885	-0.0192993	0.0714246	0.132852	0.0276701	-0.0156637	UBR2
ENSG00000024862	grey	-0.0659827	-0.0441696	0.0403924	0.00795415	-0.130536	0.081938	0.012926	0.041772	0.110156	0.0872607	-0.090877	0.0688421	-0.0480454	0.0466252	0.0294872	-0.0548982	0.0530948	0.0413494	-0.0374341	-0.00877624	CCDC28A
ENSG00000025039	CD8T13	0.0436206	0.127979	0.106943	0.195415	-0.0308139	-0.00406958	0.0224913	0.0298004	0.119882	0.165631	-0.11488	0.159155	-0.0142895	0.247199	-0.0121032	-0.00080428	-0.0367254	0.0958299	0.0497956	0.0446424	RRAGD
ENSG00000025156	grey	0.144818	0.0841409	0.009521	0.0387907	0.0992027	0.028642	0.0330007	0.0174791	-0.0609171	0.0847196	-0.0183693	-0.00149378	0.130822	0.113783	-0.102068	-0.0333962	0.0127826	0.107023	-0.0059121	-0.0245439	HSF2
ENSG00000112394	CD8T4	-0.123438	0.0777388	0.199625	0.384084	-0.17777	-0.123128	-0.0590029	0.0912182	0.0359112	0.115386	-0.358695	0.184711	-0.131224	0.266714	-0.0518057	-0.0499169	-0.0576654	0.00492121	-0.00382664	0.12157	SLC16A10
ENSG00000147403	CD8T2	0.403405	0.609447	-0.0352098	-0.0212224	0.0097441	0.0971246	-0.0071428	-0.165377	-0.0710716	0.122456	-0.00832805	0.196628	0.204859	0.100152	-0.0509264	-0.325006	-0.0332281	0.228232	-0.00985528	-0.19653	RPL10
ENSG00000025772	grey	0.0219889	-0.0164896	-0.0464336	-0.0807041	-0.0034131	0.0475347	0.164577	-0.0382406	-0.0801407	-0.115535	0.0865557	-0.150114	0.041976	-0.0691619	-0.00865658	0.056463	-0.0142563	0.00397941	-0.0413009	0.0127055	TOMM34
ENSG00000025796	grey	0.0864645	0.00156831	-0.140505	-0.0409851	0.13481	-0.0116092	0.0851291	-0.0318752	0.034724	-0.0208594	0.130069	-0.164655	0.244157	0.0214146	-0.0343791	-0.0706802	-0.0854598	0.0590637	0.00541258	-0.0327825	SEC63
ENSG00000025800	CD8T12	0.0604695	0.0159353	0.0285963	-0.010922	0.0307205	0.077082	0.108246	0.0240742	0.0681213	0.0361206	0.111778	0.018033	0.102413	0.0247802	-0.0460924	-0.0130545	0.0961191	0.0235323	0.0028653	-0.045796	KPNA6
ENSG00000026025	grey	0.229959	0.350634	0.0855966	0.0332776	0.0302951	0.036656	-0.0509562	0.0161439	-0.1071	-0.010642	-0.042352	0.16282	0.185452	0.129208	0.0609267	-0.108085	0.0192585	-0.017923	-0.0330423	-0.154396	VIM
ENSG00000026103	grey	0.117086	0.0444243	-0.0891604	-0.104979	0.0714828	-0.0688075	-0.00872297	0.0453015	-0.0643512	-0.0813467	0.194127	0.0736734	0.0786221	-0.0299119	0.0585044	0.0095624	0.137726	0.0523447	0.0109227	-0.0455251	FAS
ENSG00000026297	CD8T14	0.0745269	0.0431138	0.0325445	-0.0866367	-0.0488936	0.0868217	0.0281279	-0.0377916	0.0731715	0.123918	0.0609546	0.0290668	0.101528	0.0978995	0.163388	-0.0520652	0.00561127	0.0175995	-0.0950009	0.0188943	RNASET2
ENSG00000026508	grey	0.051811	0.0958754	0.00514123	0.0351707	0.235808	0.0649617	0.0214907	-0.00171606	-0.0769848	-0.0146418	0.0680395	-0.0274726	0.0496925	-0.089261	-0.0351546	-0.05847	-0.0492665	0.0428642	0.125032	-0.00220472	CD44
ENSG00000026652	CD8T6	0.051881	-0.056083	0.124382	-0.0660772	-0.0179641	0.175726	0.176731	0.0296033	0.117643	0.119213	0.135909	0.0296547	0.0925809	0.074824	0.121926	0.107597	0.16782	0.09405	0.0197548	0.0520462	AGPAT4
ENSG00000026751	CD8T16	0.204529	0.105733	-0.131421	-0.141131	-0.0230475	0.0842019	-0.0489411	-0.179849	-0.051966	-0.106194	0.116425	0.0873222	0.0585335	0.0317987	0.0940926	-0.0255715	0.367936	0.0702764	0.000429108	-0.0516219	SLAMF7
ENSG00000156482	CD8T2	0.35383	0.60767	-0.056048	0.000931587	0.0373947	0.00296238	-0.114435	-0.163709	-0.0681501	0.0384693	-0.0521964	0.250842	0.121015	0.0616414	0.0806656	-0.246898	-0.0159027	0.156794	-0.00128511	-0.101055	RPL30
ENSG00000027001	CD8T11	0.0435498	0.176548	0.109807	0.0294549	-0.0592634	0.0826196	0.141238	0.0103707	0.044912	0.109829	-0.0235205	0.157415	0.00940652	0.0278923	0.0592565	0.0535582	0.0379528	-0.0463372	0.0680063	0.023001	MIPEP
ENSG00000027075	grey	-0.0376987	-0.12676	-0.054062	-0.10922	0.157842	0.0337952	-0.0457674	0.0836	0.0473304	-0.0458351	0.140134	-0.0275241	0.0369102	-0.0285571	0.0978653	0.0827257	0.0723122	0.119744	0.0832886	-0.0753205	PRKCH
ENSG00000027697	CD8T5	0.142203	0.0270005	-0.12833	-0.148609	0.394464	0.117619	0.0405786	0.0234067	-0.0429357	-0.0546455	0.218618	0.0387057	0.180009	-0.0249181	0.0428742	0.0316031	0.0674396	0.0548456	0.15811	-0.148001	IFNGR1
ENSG00000027869	grey	0.0900417	0.0718278	-0.0813625	-0.007746	0.151245	0.0596198	-0.0535657	0.0130884	-0.072766	-0.0196614	0.0393246	-0.0537105	0.13038	-0.0859386	0.0201497	-0.0491644	-0.00750109	-0.0531313	-0.048458	-0.063569	SH2D2A
ENSG00000234745	CD8T2	0.389695	0.606918	-0.0678385	-0.0761741	-0.0220825	0.160376	-0.0321789	-0.195047	-0.178435	0.0554941	-0.00317534	0.207403	0.177001	-0.0054967	-0.0120313	-0.153394	0.022792	0.121305	0.00965334	-0.144854	HLA-B
ENSG00000028137	grey	-0.00269876	0.0744697	-0.0303563	0.0980752	0.200417	0.0115805	-0.124968	-0.010561	-0.0332442	0.0211074	-0.0910961	-0.0389438	0.00828669	-0.00705418	-0.0576425	-0.126803	-0.106837	0.0140125	0.0557691	-0.102102	TNFRSF1B
ENSG00000028203	CD8T13	-0.0374287	0.0429619	0.102859	0.115852	-0.0826955	0.0183612	0.0112299	0.00632796	-0.0243927	0.0581832	-0.138964	0.139776	-0.061773	0.0781308	0.0488453	0.0444592	0.013409	-0.0650892	0.033675	0.0894829	VEZT
ENSG00000028277	grey	-0.124361	-0.0768482	0.00766254	-0.0107269	-0.131218	-0.0349663	0.176084	0.0125544	0.0539744	0.0378801	0.00881533	0.00666271	-0.0946537	0.0480325	-0.0204102	0.174472	0.00396513	-0.0626972	0.00476063	0.0413222	POU2F2
ENSG00000028310	grey	-0.00556818	-0.0922258	0.0631041	0.0437826	-0.0799772	-0.083032	0.119619	0.102434	-0.0180435	0.022493	0.0353414	0.0548469	0.0169135	0.101365	-0.018602	-0.00169155	0.0782502	0.0670494	-0.00530229	0.0663357	BRD9
ENSG00000028528	grey	0.022846	-0.0559622	0.108206	-0.0434209	0.136993	0.070394	0.0640119	0.121483	0.0191935	-0.0382034	0.184551	-0.0300306	-0.00318147	-0.020588	0.0537992	0.0533375	0.109517	0.0619799	0.0732371	-0.0468275	SNX1
ENSG00000028839	CD8T10	0.162501	0.152276	-0.0616938	-0.204728	0.0562198	0.146359	0.0400407	-0.0441517	-0.0741936	-0.0139136	0.220367	0.0334546	0.165058	-0.122838	0.103675	0.00102008	0.0964226	0.0574066	-0.0625328	-0.0373971	TBPL1
ENSG00000029363	CD8T6	0.0642674	0.000476843	0.0674376	-0.0544158	-0.0383563	0.241369	0.0331832	-0.122591	0.0241994	-0.0574726	0.089855	0.0145758	0.0129271	0.031302	-0.0196642	0.00745244	0.191812	-0.104431	-0.106411	-0.0684886	BCLAF1
ENSG00000029364	grey	0.0352759	0.0568909	0.025204	0.0761313	0.00755408	-0.0997497	-0.0350873	0.153866	0.0785326	-0.019838	-0.0342835	-0.00820212	-0.165369	0.0401694	-0.0276578	0.0602142	-0.00300856	0.00144864	0.120387	-0.0313904	SLC39A9
ENSG00000029639	grey	-0.07268	-0.0426179	0.0788265	0.0247156	0.0369089	0.0280196	0.0271719	-0.0240408	-0.0652685	0.0483905	-0.00546914	0.0261326	-0.00484961	0.0365218	0.0397175	0.0414194	-0.0290075	-0.0926154	-0.0775018	0.0759168	TFB1M
ENSG00000029725	grey	0.119062	0.119385	0.0776088	-0.0247719	-0.0711492	0.111063	-0.0227316	9.45964e-05	0.0255894	0.0518367	0.0630925	0.192797	0.0321363	0.0677484	0.0633167	-0.0311101	0.155481	0.112813	-0.107191	0.097041	RABEP1
ENSG00000030066	grey	-0.0280743	0.00898582	0.102483	0.0380608	0.00497594	0.0222749	-0.057804	0.0608178	0.065851	-0.0757203	-0.0531792	0.0748913	-0.0536814	0.0137708	-0.138488	0.116965	0.105752	-0.025872	0.0418183	-0.0138	NUP160
ENSG00000030419	grey	-0.0246408	0.0587934	0.0129369	0.00145882	-0.0199823	0.0655846	-0.0931773	-0.0230419	0.00891343	-0.0303571	0.0035929	0.053982	-0.107776	0.0384296	-0.102196	0.0181245	0.13191	-0.0222492	0.0320478	-0.0325893	IKZF2
ENSG00000031003	CD8T7	-0.079518	-0.113749	-0.0608882	0.0581475	0.0363017	-0.072685	0.102788	0.197323	0.166955	-0.0981707	0.068478	-0.0198723	-0.0314026	0.0330895	-0.0221628	0.140924	0.110671	0.124236	0.0879938	0.127155	FAM13B
ENSG00000031081	grey	0.00108755	-0.0316978	-0.0805388	0.0169705	-0.050697	0.00406409	0.00665538	0.042479	-0.00706907	0.0381458	-0.0398332	0.0543545	-0.0750745	0.0883719	-0.0408586	0.0274238	0.109391	0.0120209	0.0623906	0.0975783	ARHGAP31
ENSG00000115607	CD8T4	-0.159404	-0.0411531	0.13206	0.380758	0.0462146	-0.24829	0.0386363	0.237676	0.112665	0.0639065	-0.234199	-0.0343956	-0.109193	0.0493243	-0.217872	0.00613321	-0.288563	0.0523405	0.220721	0.20614	IL18RAP
ENSG00000031823	grey	-0.0308879	-0.0501268	-0.00879414	-0.0154079	-0.0687849	0.0118699	0.0610416	0.137156	0.101566	0.0488804	0.0493825	-0.107338	-0.0697551	0.143569	0.0535623	0.0398065	0.18018	-0.00584835	-0.0748531	0.0576092	RANBP3
ENSG00000032219	grey	0.0913591	0.187506	0.00728529	0.06571	0.0250473	0.0642589	-0.0496767	-0.0328696	0.0319631	0.0208192	-0.0366606	0.0217032	0.0225118	0.0248925	0.0451357	-0.094101	-0.0326149	0.0683754	0.0117327	-0.0619616	ARID4A
ENSG00000032389	grey	-5.9722e-05	-0.0292998	0.0983572	0.0208206	0.0196781	0.0400287	-0.000341415	0.0891038	0.0616928	-0.0472561	0.027703	-0.00293502	-0.012997	0.0859833	-0.0092278	0.0989695	0.125221	-0.0358661	0.0362181	0.0498089	EIPR1
ENSG00000032444	grey	0.00325462	0.0447629	-0.0439038	0.0186829	-0.0272258	-0.00471811	0.126861	0.0903484	-0.0469809	-0.00163066	0.0484719	0.028692	-0.027189	0.0238966	0.111079	0.14484	0.0531592	0.0388946	0.0516458	-0.0311383	PNPLA6
ENSG00000032742	grey	0.00323151	-0.00518973	-0.0186282	-0.040651	0.0267282	0.115008	-0.00901047	0.0114454	-0.0297385	-0.0164427	0.0865468	0.0295964	0.0519213	-0.0825224	0.107473	0.103328	0.0246231	-0.0136747	0.08794	0.0208066	IFT88
ENSG00000033011	grey	0.0527434	-0.0566215	-0.0121752	-0.0505737	0.0672884	0.0104878	-0.0754531	0.0985006	0.0451779	-0.146343	0.044136	-0.10495	0.0277949	0.0304811	0.0313862	0.0461351	0.0613884	-0.006828	-0.0911178	-0.123871	ALG1
ENSG00000033030	grey	-0.0185233	0.00386403	0.108327	0.0307227	0.0508826	0.102488	0.146925	0.164391	-0.0563029	0.012522	0.132085	-0.014745	0.0728982	0.0606809	-0.0425514	0.19703	0.0950688	-0.0483219	0.0278502	0.0537418	ZCCHC8
ENSG00000033050	grey	0.00229488	-0.0285247	-0.0360331	-0.0393431	-0.018399	-0.079259	-0.068037	0.0360948	-0.0404374	-0.106489	-0.0242216	0.00859529	-0.0930633	0.0426116	0.0179459	0.0279099	-0.0413113	-0.0609257	0.0143961	0.0618602	ABCF2
ENSG00000033122	grey	-0.0423316	-0.0920642	0.00120512	0.0433837	-0.00481421	-0.0416714	0.271201	0.185243	0.255508	0.156047	0.0346575	0.0533995	-0.062848	0.118043	0.115498	0.15301	-0.0217615	0.219905	0.0921903	0.157441	LRRC7
ENSG00000033170	CD8T10	0.107415	0.047138	-0.0742458	-0.151768	0.0333175	0.0647686	-0.111624	0.0469193	-0.0264055	-0.0550722	0.169731	-0.0261925	0.102551	-0.128564	0.177982	0.0803163	0.0761619	-0.0469175	-0.0767891	-0.143192	FUT8
ENSG00000033178	CD8T1	0.0965031	0.0900712	-0.0658425	-0.101235	0.0944084	0.0537189	0.00302421	-0.00742613	-0.105238	-0.0232064	0.104474	-0.0652753	0.0915846	0.00099544	0.0239155	-0.0252677	0.00831111	0.0442842	-0.0245978	-0.10795	UBA6
ENSG00000033327	grey	-0.0110986	-0.0433385	-0.0365874	0.0431054	0.0263702	-0.0597074	0.309107	0.163014	0.0923776	0.146932	0.0887478	-0.0853939	-0.0336604	0.0738045	0.0736795	-0.00328789	0.0494962	0.0606922	-0.0695485	0.03109	GAB2
ENSG00000033627	CD8T8	-0.100578	-0.0829425	0.0655519	0.0549844	-0.0604915	-0.0746223	0.144801	0.0673757	0.367361	0.104716	-0.0474876	-0.0376604	-0.00896083	0.1382	0.0579217	0.0102688	-0.00627917	0.166276	0.0282149	0.136237	ATP6V0A1
ENSG00000033800	grey	0.0433588	-0.0239743	0.10189	0.0874179	0.0696109	-0.0121312	-0.0896095	0.0983069	-0.0723407	-0.0212705	0.0287512	0.066357	0.0100623	0.13271	0.00244566	0.0542443	0.137954	-0.044765	0.0903229	0.0188985	PIAS1
ENSG00000196814	CD8T4	-0.0957281	-0.0101567	0.119836	0.368957	0.0514998	-0.104986	-0.043601	0.103721	0.0297181	-0.10025	-0.213497	0.115064	-0.146844	0.066393	-0.214804	0.0385226	-0.00328093	-0.0424179	0.187534	0.112939	MVB12B
ENSG00000206190	CD8T4	-0.255929	-0.173064	0.139897	0.366141	-0.115219	-0.168486	-0.0146149	0.170003	0.0546376	0.0330637	-0.284583	-0.0219524	-0.144246	-0.0395439	-0.180588	0.0954125	-0.261168	-0.128795	0.171342	0.114652	ATP10A
ENSG00000034152	grey	-0.030412	0.0217254	0.102921	0.0523398	0.0873951	-0.0065166	0.0201463	0.0353283	-0.100216	0.0223884	0.00426554	0.0452576	0.0806182	0.0129162	-0.0138458	-0.0290637	0.00391297	0.0209508	0.0359562	0.00524215	MAP2K3
ENSG00000115268	CD8T2	0.402388	0.602104	-0.0249264	-0.0195648	-0.0417651	0.184169	-0.030279	-0.149956	-0.0622178	0.030536	0.000442561	0.188638	0.150225	0.17556	0.00368393	-0.145376	0.045135	0.087225	-0.0125635	-0.101005	RPS15
ENSG00000034533	CD8T9	-0.0342726	0.084894	0.00641187	-0.0551951	-0.0279529	0.0674837	-0.0566629	-0.115731	-0.0950752	0.124155	-0.00812809	0.0673541	-0.00485982	-0.0341059	0.0240319	-0.123611	-0.149584	-0.0959493	-0.0929266	-0.0153728	ASTE1
ENSG00000034677	CD8T16	0.086033	-0.0271273	-0.0583491	-0.166736	0.0858784	-0.0112633	-0.00281818	0.0735326	0.0343525	-0.0868672	0.177262	-0.0875923	-0.0201061	0.0726756	0.0938021	-0.079177	0.0689799	0.0202161	-0.147043	-0.143449	RNF19A
ENSG00000034693	CD8T5	0.0609569	-0.0155827	0.0111112	-0.0577991	0.147706	0.11648	0.0913439	-0.0493107	-0.134262	-0.02092	0.161197	0.0594985	0.142149	-0.0913388	0.0221684	0.0590659	0.0781198	-0.0255272	-0.0801208	-0.0886668	PEX3
ENSG00000034713	grey	0.107646	0.0281057	-0.111002	-0.0817504	0.149108	-0.0590744	-0.0247285	-0.00188865	0.00719747	0.0104542	0.074453	-0.0544471	0.0950862	0.00479697	-0.0657506	-0.00844006	0.0257089	0.13488	0.0333	-0.100545	GABARAPL2
ENSG00000035115	grey	0.0161188	0.0771686	-0.0235018	0.0767365	-0.0441286	-0.0916895	0.0367999	0.0382973	0.0913406	0.0412028	-0.00438144	-0.0396681	-0.0013111	0.0121626	0.0730699	-0.0465032	0.0425121	0.105697	0.0391378	0.040789	SH3YL1
ENSG00000035141	grey	-0.0133479	0.0306701	0.0717705	-0.0655592	-0.0149371	0.0655263	-0.0559766	-0.0590503	0.0834644	-0.00623024	-0.011915	0.11133	0.0885297	-0.0788346	0.211231	0.00120749	-0.0507027	0.025646	-0.00343394	0.0543761	FAM136A
ENSG00000117020	CD8T4	-0.140949	-0.0326006	0.0139411	0.363279	0.0549829	-0.194139	-0.0131017	0.197382	0.0372285	-0.03466	-0.260953	-0.00685775	-0.189798	0.107668	-0.193062	-0.030445	-0.153085	0.0687855	0.194036	0.0687923	AKT3
ENSG00000182621	CD8T4	-0.211485	-0.138071	0.168172	0.359195	-0.183416	-0.0979984	0.0993886	0.167974	0.0521215	0.156639	-0.250761	0.0832651	-0.173101	0.18159	-0.0707701	0.0356978	0.0310026	-0.000149875	0.0892933	0.249794	PLCB1
ENSG00000035681	CD8T15	-0.0299541	-0.0674633	0.0943265	0.0419641	-0.0246299	-0.0114799	0.0879699	0.150933	0.0126493	0.0176749	-0.0136017	-0.0279218	0.0078711	0.06737	0.0250945	0.23377	0.0556195	0.0209976	-0.00272977	0.0085916	NSMAF
ENSG00000035687	CD8T6	0.0440263	-0.0223795	-0.0547159	-0.081173	0.092121	0.0594209	-0.0320049	-0.0331952	0.0213569	0.00582703	0.123009	-0.0074368	0.128498	0.0297035	0.051459	0.0265124	0.0747938	0.113276	0.0295092	-0.0426595	ADSS2
ENSG00000035862	grey	-0.0243712	0.0219226	0.0211361	0.042718	-0.0595359	0.0293075	0.270532	0.050393	0.0119929	0.135453	0.0322883	0.0456862	0.0374422	0.0421364	0.0609784	0.113734	0.0396468	0.146293	-0.0293509	0.0972212	TIMP2
ENSG00000035928	grey	0.0703807	0.107938	-0.0980703	0.0471119	-0.0064277	0.0849198	0.0751616	0.022402	-0.0726443	-0.0566744	0.023839	-0.0532148	0.0301383	-0.107621	-0.186794	0.0356151	-0.0197463	-0.0633503	0.0857552	-0.044061	RFC1
ENSG00000036054	CD8T10	0.0443	-0.015416	-0.0454394	-0.0781515	-0.0171985	0.00388448	-0.0328919	0.0136151	-0.0752419	-0.00878416	0.0783193	-0.0214301	0.0214928	-0.0306768	0.137499	-0.0599384	0.0353196	-0.194808	-0.083807	0.045599	TBC1D23
ENSG00000036257	grey	-0.0181015	0.0080733	-0.0536246	0.0589638	-0.0794793	-0.0486794	0.0422106	0.115447	0.00930824	0.102291	-0.0143887	0.031576	0.0435822	0.068276	0.0242221	-0.0161495	0.0638786	0.0230098	-0.0572399	0.135307	CUL3
ENSG00000036530	grey	-0.0533347	0.0581734	0.0431209	0.106434	-0.0728502	-0.00391469	0.101943	-0.0500722	0.0311593	0.171877	-0.0605274	0.0796529	0.0494522	0.134399	0.0898538	-0.0472703	-0.0399232	0.13069	-0.082712	0.0353016	CYP46A1
ENSG00000036549	CD8T13	0.0303059	0.03738	-0.0858803	0.0546174	-0.0953343	-0.104378	-0.051244	-0.0410333	-0.0471228	0.010988	-0.129162	0.00459518	0.0187904	0.0310081	-0.126578	-0.141031	-0.105245	0.0115027	0.034375	0.0328945	ZZZ3
ENSG00000037042	grey	0.0800156	0.0857656	-0.0594399	-0.0272587	-0.00792905	0.148334	0.0143388	-0.123128	-0.0590369	0.0137154	-0.0372996	0.101697	0.0630594	-0.0810219	0.0750152	-0.129881	-0.0212944	-0.0349267	0.0257483	0.0346284	TUBG2
ENSG00000037474	grey	0.0680726	-0.0167936	-0.0702167	0.0444142	0.139644	0.0248047	-0.0657266	-0.0233857	-0.0626791	-0.0419045	0.01215	-0.00418579	0.107282	-0.0511512	-0.0371205	-0.0676358	-0.0187925	0.0245616	-0.0239699	-0.0433673	NSUN2
ENSG00000037637	grey	-0.070263	-0.0910981	0.087476	-0.0163693	-0.108548	0.0441651	0.0633613	0.0804498	0.112288	-0.00715527	0.0495502	0.0223371	-0.0969166	0.0147735	0.106528	0.10419	0.0620915	-0.0719942	-0.00818129	0.088594	FBXO42
ENSG00000037749	CD8T1	0.202293	0.0691859	-0.0502939	-0.0287498	0.148573	0.0607901	-0.00505403	-0.0336598	-0.0559656	-0.0342354	0.0728438	0.0968635	0.0927888	0.179879	-0.0498844	-0.0208783	0.200667	0.140272	0.0435489	-0.141513	MFAP3
ENSG00000037757	CD8T17	0.0792839	-0.00489661	0.00944186	0.0655233	-0.00404658	-0.0467905	0.00442735	0.0412336	0.0881585	0.0281687	0.0212767	0.0435213	0.0379629	0.0013501	-0.0189856	0.00284883	-0.0800495	0.195078	0.00670938	0.040076	MRI1
ENSG00000038002	grey	0.0818852	0.0478641	-0.14702	0.0613841	0.00222648	0.0238699	-0.0877215	-0.111754	-0.00545997	-0.0858048	-0.0767776	0.00562796	0.0472296	-0.0223528	-0.0718879	-0.206712	-0.0814538	-0.0290816	0.0295902	-0.00344483	AGA
ENSG00000038210	grey	0.0131263	-0.0665133	0.111725	-0.0746623	-0.0566852	0.00385127	-0.0715734	0.0418727	0.024861	-0.0178953	0.100514	-0.00941295	-0.0389164	0.00629683	-0.022137	0.0602045	0.138256	-0.113236	-0.0726857	-0.040426	PI4K2B
ENSG00000038219	grey	-0.0469025	0.0348248	-0.0735049	0.055902	0.11088	0.0193467	0.0580101	-0.00104066	-0.118759	-0.0287288	0.00965049	-0.0195525	0.0630006	0.0299921	-0.0121014	0.0504523	0.0277784	-0.129227	0.117977	0.0429594	BOD1L1
ENSG00000038274	CD8T1	0.147828	0.0930547	-0.0704371	0.00130991	-0.0189947	-0.00430225	0.0206334	-0.0565005	-0.0654465	-0.024078	-0.0271215	-0.0415467	0.07177	-0.0101296	-0.035881	-0.0359616	-0.000989756	0.0550357	0.0662966	-0.0615993	MAT2B
ENSG00000140988	CD8T2	0.370875	0.600703	0.0359951	0.039347	-0.0105123	0.122837	-0.158126	-0.154494	-0.0600946	0.0115387	-0.13644	0.264574	0.099591	0.076992	-0.0645669	-0.24843	0.0278037	0.0399525	0.0246046	-0.130562	RPS2
ENSG00000038382	CD8T10	-0.0562511	-0.0688417	0.0636841	-0.0880579	-0.00700384	0.00341077	0.166064	-0.0196121	0.033746	0.117333	0.206804	0.0649559	-0.0487566	0.136516	0.0962937	0.111528	0.151398	0.0734389	-0.0598212	-0.00245257	TRIO
ENSG00000038532	grey	-0.0391727	-0.102668	-0.00500785	0.0222785	-0.0700677	-0.00841504	0.164212	0.0654309	0.0873609	-0.0269806	0.0150839	-0.0993148	0.00381701	0.103269	0.196426	0.108724	0.138229	0.0988489	-0.0953767	0.0600162	CLEC16A
ENSG00000039123	grey	0.118988	0.0349663	0.0489876	0.0855793	0.0574798	-0.00484839	-0.0572073	0.0946647	-0.00696951	-0.112454	0.000274854	0.0147478	-0.00514476	0.111648	-0.0523959	0.03292	0.0839333	-0.0790072	0.0640271	-0.0577622	MTREX
ENSG00000039319	grey	-0.0038262	0.0741883	-0.0213111	0.0869642	-0.0251665	0.0149936	0.0547508	-0.0170277	0.0190361	0.0125955	-0.0786182	0.0144573	0.00685697	-0.00925086	0.0603495	0.00514409	-0.0672332	0.0789817	0.0112763	0.0313504	ZFYVE16
ENSG00000039523	CD8T13	-0.0413846	0.016379	0.0740416	0.0202062	-0.130275	-0.0462486	-0.00712086	-0.0302437	0.0762107	0.0197187	-0.058334	0.00648227	-0.0575554	0.0338551	0.00370766	0.0418592	0.0363051	-0.0253479	0.0103357	0.0299347	RIPOR1
ENSG00000039650	CD8T17	-0.00406465	-0.024127	-0.0852124	-0.130517	-0.0301013	-0.100839	0.0209508	-0.0215547	0.0774742	0.0967325	0.028707	-0.0522771	0.0164456	0.011324	0.0293942	-0.0967862	-0.0479564	0.22143	-0.00522842	-0.059137	PNKP
ENSG00000040199	grey	0.0433385	-0.0630497	-0.0711982	-0.0642358	0.0565323	-0.0688481	-0.0361983	-0.0622391	0.0123715	-0.0086669	0.0432228	-0.068532	0.0564013	-0.128584	-0.104297	-0.0881176	-0.0529341	0.0403842	-0.0350089	0.0393151	PHLPP2
ENSG00000040341	CD8T17	0.0919075	0.0981675	-0.133982	0.031769	-0.0379764	-0.0805565	0.028449	-0.0475475	0.0450767	-0.0046263	0.0763223	0.0341525	0.116155	0.0981284	0.0339093	-0.121101	0.0942302	0.142513	-0.0444467	-0.0659844	STAU2
ENSG00000040731	grey	-0.000472508	-0.00608501	0.124556	-0.0712738	0.036963	0.146887	0.00214087	-0.0743534	0.00904315	0.0919762	0.0346588	0.101691	-0.00662936	-0.072853	0.0459747	-0.0090052	-0.109439	0.0662578	-0.0106776	0.00921059	CDH10
ENSG00000040933	CD8T19	-0.192363	-0.237202	0.0813491	0.138435	-0.0960121	-0.115881	0.0492869	0.160196	0.0731838	-0.019498	-0.0759591	-0.122598	-0.0762844	0.0864089	-0.0325732	0.245371	0.0204015	-0.0321828	-0.0258891	0.147455	INPP4A
ENSG00000041353	grey	0.128117	0.0588352	0.103722	0.0434079	-0.0566075	0.121198	0.0472302	-0.0250135	0.00340981	0.0695398	-0.03221	0.153801	0.0802942	0.0828487	-0.0182911	-0.0138667	0.0621535	0.0351207	0.0106821	-0.0306319	RAB27B
ENSG00000041357	CD8T9	0.0719195	0.150014	0.0772966	0.0529332	-0.0151863	0.0759923	0.0586534	-0.00299294	0.0417792	0.114223	-0.00884842	0.159584	0.0219052	0.104129	-0.0104697	0.0424481	0.144105	0.0917487	0.104873	0.0431234	PSMA4
ENSG00000041515	grey	-0.0160288	0.00129486	0.0572933	-0.0282467	0.0469236	0.102351	-0.021913	-0.0951769	-0.107416	0.0524388	-0.0216625	0.0656698	0.0195819	-0.037372	-0.0788735	-0.125679	-0.0279388	-0.174607	0.0292645	-0.0255368	MYO16
ENSG00000041802	grey	0.0352526	0.065899	0.0266658	0.0888562	-0.0207604	-0.0177042	-0.0863694	0.0901161	0.0895814	-0.0590442	-0.088501	0.0321829	-0.0250701	0.0757808	-0.0668018	0.0266835	0.0338917	-0.0554864	-0.00311495	0.0525422	LSG1
ENSG00000042088	CD8T10	0.00284041	0.0366901	-0.0287937	-0.0293068	0.135275	-0.0948185	-0.0293878	0.101643	0.0187687	-0.0849806	0.053839	-0.0037902	0.000582827	-0.0731955	-0.0830248	0.0460915	0.00151339	0.0293505	0.142786	-0.016711	TDP1
ENSG00000042286	CD8T17	0.109722	0.0374872	-0.040992	-0.0779103	0.0122679	0.0383516	0.0228908	0.0663842	0.190506	0.0619033	0.0861274	-0.00700409	0.139261	0.0837504	0.17887	0.052413	0.00826211	0.184126	-0.0187613	0.0261974	AIFM2
ENSG00000042317	grey	0.0627187	0.071931	-0.0764329	-0.00323994	0.0527092	0.0445388	0.0403876	-0.00161477	0.0896191	0.076718	0.0335407	0.0504132	0.142196	0.0760473	0.0509095	-0.125298	0.0590158	0.0478458	-0.0355467	0.0465056	SPATA7
ENSG00000042429	grey	-0.00662128	-0.0755294	0.0352966	0.0534894	-0.0445081	-0.0182584	0.000590026	-0.040291	-0.0402042	-0.011206	-0.0276911	0.0453482	-0.0248578	0.123659	-0.0905443	-0.0326499	0.111377	-0.0786796	0.012356	0.0415448	MED17
ENSG00000042445	grey	-0.0133529	-0.00185949	0.087574	-0.00814065	-0.034258	0.0550881	0.0847479	-0.000426853	0.0877322	0.0450229	0.0229014	0.00933332	0.101549	-0.00220557	0.0626665	-0.0113549	0.0570119	0.0027427	0.0896717	0.0567962	RETSAT
ENSG00000042753	grey	0.0649937	0.0778764	-0.0490023	-0.0502522	0.0212012	-0.0490196	-0.0309618	0.00983084	0.0572635	-0.0587228	-0.0212381	0.025252	0.0456252	0.0209064	0.053619	-0.0488299	0.00246642	0.0579122	-0.0310356	-0.0237709	AP2S1
ENSG00000042832	grey	0.107615	0.156337	0.0233744	-0.00274308	-0.0435579	0.0586189	-0.0323782	-0.0913845	0.0154034	-7.61228e-05	-0.00622373	0.00845858	0.0972796	-0.00907887	0.000628182	-0.0471971	0.0387818	0.0252639	-0.038975	-0.0279361	TG
ENSG00000042980	grey	0.0392084	0.0643182	0.0702758	-0.0388401	-0.0663051	0.179678	0.301896	-0.0266324	0.00264149	0.225941	0.071099	0.0133143	-0.0147044	-0.0707374	0.039037	0.092711	0.11557	-0.0952347	-0.0621123	0.00857177	ADAM28
ENSG00000043093	CD8T17	-0.0111553	0.0234588	0.0622014	0.063344	-0.0689415	-0.0736713	0.0233799	-0.0110312	0.0834291	0.0830673	0.00342361	0.163182	0.0502575	0.141193	0.100056	-0.00320715	0.081439	0.123534	-0.0677957	0.029434	DCUN1D1
ENSG00000043143	CD8T13	0.0644191	-0.0117549	0.019968	0.0356449	-0.0392872	0.00845993	0.019779	0.0840145	0.0457314	0.0214764	0.0282394	-0.00435021	-0.011249	0.108788	0.096844	0.0775455	0.101897	0.036773	-0.0580554	-0.0453073	JADE2
ENSG00000043462	grey	-0.0404253	-0.0807034	0.177874	0.0767172	-0.00285521	0.237964	0.12875	0.149607	0.170828	0.0899619	0.146432	0.0269633	0.0589888	0.0684535	0.151737	0.160141	0.209807	-0.0534597	0.0766435	0.167402	LCP2
ENSG00000043514	grey	-0.0863945	-0.0778236	0.0943721	0.024015	0.0719226	-0.013639	0.163586	0.195436	0.0538207	0.0765471	0.0635385	-0.0493247	0.0180227	-0.0704718	0.00959376	0.117204	-0.127515	-0.0384682	0.100979	0.15414	TRIT1
ENSG00000044090	CD8T8	0.00115525	0.069215	0.0627999	0.0621096	-0.0313223	0.0620866	0.07307	0.0369945	0.0832658	0.0112206	0.0204076	0.00458999	0.086129	0.0806931	0.0529912	0.0601006	-0.00532779	-0.0451885	-0.0277568	0.0256593	CUL7
ENSG00000044115	grey	-0.0953527	-0.0921913	0.0307919	-0.0119491	0.0617303	0.0820923	-0.00221017	0.0122802	-0.0826173	-0.106959	0.0636487	0.0427645	-0.0313743	0.016337	0.0795327	0.157277	0.0918974	-0.112504	-0.0268304	0.0083989	CTNNA1
ENSG00000044446	grey	-0.0553227	0.020319	0.0250683	0.129524	0.0783281	-0.0598629	-0.00585449	0.075147	0.0875377	-0.0692712	-0.0563921	-0.130437	0.0100287	-0.081035	-0.106471	0.114104	-0.0378651	0.0377111	0.199191	0.104186	PHKA2
ENSG00000044459	grey	-0.0943427	-0.077486	0.0340941	0.0176606	0.035968	0.0479254	0.0240379	0.0675971	0.0569248	0.00115872	0.000473806	0.0589646	0.00414308	-0.0112502	0.103482	-0.0206205	-0.00275304	-0.0446705	0.0292434	0.0713245	CNTLN
ENSG00000162946	CD8T4	-0.203279	-0.104141	0.199404	0.354951	-0.195239	0.000971114	0.123478	0.0809563	0.0369475	0.214178	-0.234057	0.137508	-0.11194	0.171351	-0.0575418	-0.0091176	-0.0920434	-0.134868	0.0126137	0.235642	DISC1
ENSG00000164587	CD8T2	0.387851	0.596907	-0.0854637	0.0538453	0.0719625	0.0612256	-0.112751	-0.134785	-0.0841591	0.0375529	-0.0441332	0.0928903	0.146232	0.167192	0.0254708	-0.170769	0.111664	0.142702	-0.00945415	-0.218699	RPS14
ENSG00000046647	grey	0.0134277	0.0613857	-0.0515399	0.0103141	0.0218194	-0.0747441	0.0223588	0.0622879	-0.0706997	0.0494804	-0.03849	-0.0750819	0.00153286	-0.0479664	-0.0866759	-0.0927007	-0.122246	0.0773362	-0.0078751	-0.0110617	GEMIN8
ENSG00000046651	grey	-0.0649584	0.0565263	0.0646499	0.0910616	-0.0669646	0.000774379	-0.0500363	0.102872	0.0280035	0.0321135	-0.0246366	0.101065	-0.0793157	0.0233453	0.0698806	0.127094	0.0714344	-0.00877728	0.0335231	0.0523299	OFD1
ENSG00000046653	grey	-0.0167968	-0.144581	0.146051	-0.0384184	-0.015971	0.0340561	0.194844	0.163176	0.0467578	0.0953679	0.126356	0.0339444	0.0938421	0.0863805	0.0196543	0.106799	0.00996501	0.0636175	0.151213	0.062935	GPM6B
ENSG00000046889	CD8T10	-0.0414422	-0.0506371	0.0545978	-0.033597	0.0040086	0.0441322	0.104115	-0.021508	-0.0469383	0.0485567	0.0893593	-0.00515839	-0.01806	-0.0698167	0.00642625	0.0251183	0.0105189	0.0371693	0.00423108	-0.0482588	PREX2
ENSG00000047056	grey	-0.0765145	-0.0781605	-0.0404611	0.00503708	-0.0108306	-0.110594	-0.0384801	0.121983	0.0168621	-0.0314506	0.0150136	-0.0490894	-0.0886009	-0.0694076	-0.0773376	0.0796431	-0.0760322	0.00965775	0.0131043	0.00663891	WDR37
ENSG00000047188	grey	0.079757	0.122326	0.00699291	0.0045954	-0.13577	0.140445	0.0206686	0.0866309	0.0436471	0.0183967	0.0181896	0.182203	-0.0855664	-0.0949966	-0.00755323	0.081831	0.114454	-0.10109	-0.0275994	0.0355241	YTHDC2
ENSG00000047230	grey	0.0138991	-0.0544402	0.104707	0.0457219	-0.0352969	-0.0661332	0.104091	0.128751	0.0489943	0.000378292	0.0350973	-0.000132026	-0.0335785	0.0568828	-0.0661159	0.0289629	0.026814	0.0560545	0.0568263	-0.0229317	CTPS2
ENSG00000047249	grey	0.0493753	0.0404605	0.0344894	0.00676315	0.042972	0.0458845	-0.016852	0.0835405	0.0169788	-0.0386298	0.0577297	-0.0441257	0.0656214	0.0292411	-0.0186719	0.115936	-0.0155204	0.0193864	0.0626691	-0.0375991	ATP6V1H
ENSG00000047315	grey	-0.0312332	-0.0350687	0.0548039	0.0742678	0.050967	0.012812	-0.00328594	-0.0143267	0.038932	-0.0402423	-0.00443445	-0.0179706	0.0716409	-0.0380285	0.0419113	-0.0229611	-0.0128347	0.0423808	-0.0620115	0.0361913	POLR2B
ENSG00000047346	grey	-0.0455787	-0.102085	-0.0839887	0.107636	0.223041	-0.0104264	-0.0570104	0.0540385	-0.0776347	-0.114341	-0.0114445	-0.147202	-0.0489371	-0.0521012	-0.167557	0.0175813	-0.0404861	-0.0071587	0.106121	0.0240344	ATOSA
ENSG00000047365	CD8T10	0.00180725	-0.107436	0.0287738	-0.0646546	0.0302956	0.0405672	0.0133468	0.080609	0.0960398	-0.015543	0.0868259	-0.0621844	0.0667057	0.0920187	0.047469	0.103566	0.163841	-0.0226936	0.00596391	-0.00337475	ARAP2
ENSG00000105640	CD8T2	0.392631	0.593038	-0.0499821	-0.039614	0.107713	0.218541	-0.0628231	-0.15367	-0.0537186	0.0147978	-0.0327834	0.11091	0.216943	0.0490266	-0.0291128	-0.205615	0.0613531	0.0548224	0.0285672	-0.127593	RPL18A
ENSG00000047578	grey	0.0429506	-0.018426	-0.106711	-0.00128064	-0.0372379	-0.0775274	-0.0570364	0.066438	-0.107601	-0.0259161	-0.0675571	-0.0175646	-0.0380504	0.0216726	-0.0465525	-0.0124501	0.0361049	-0.00157365	-0.0263908	-0.0328213	KATNIP
ENSG00000047579	CD8T19	-0.0147227	-0.0405485	0.118994	0.0113165	-0.0231315	0.0042974	0.071606	0.0917879	0.0214063	0.0597504	0.0209615	0.103037	-0.0816566	0.0340525	0.0469418	0.14788	0.0853321	0.0422681	0.104225	0.14626	DTNBP1
ENSG00000047621	grey	-0.00949615	-0.012235	0.0793142	0.00141484	0.00597883	-0.0640198	0.024493	-0.0680752	0.0212176	0.0754671	-0.00880584	0.0564019	0.102682	0.144433	0.0292938	-0.0255058	-0.0303492	0.0566419	-0.0125875	0.0490444	C12orf4
ENSG00000047644	CD8T15	-0.0360076	-0.034913	0.1665	-0.0397436	0.010072	0.147137	-0.0356513	-0.0174974	0.0275865	0.016533	0.105376	0.0478286	0.0195829	-0.0580676	0.149214	0.198571	0.0791172	-0.111629	-0.00442399	0.0260259	WWC3
ENSG00000047648	grey	-0.0787104	-0.0752158	0.0196154	0.0735789	-0.0401634	0.0273199	0.434222	0.162939	0.065876	0.142638	0.0913077	0.0477086	0.0336053	-0.0142393	-0.065639	0.105649	-0.0276409	-0.0674521	0.154598	0.245726	ARHGAP6
ENSG00000085563	CD8T4	-0.0987624	0.0163006	0.0890456	0.35256	-0.120237	-0.0597437	-0.0619237	0.071156	0.0398109	-0.0310599	-0.254639	0.0958363	-0.111598	0.148491	-0.109454	0.0383221	-0.00602172	-0.0622422	0.0714589	0.137359	ABCB1
ENSG00000047932	grey	0.0983084	0.202777	-0.00437692	-0.0183003	-0.0154916	0.131121	-0.0309621	-0.0230546	-0.0175128	-0.0792855	-0.0203389	0.107143	0.0554375	0.0409938	-0.0608036	-0.0179509	0.13971	-0.0558747	-0.00805199	0.0526918	GOPC
ENSG00000048028	CD8T6	0.239101	0.111894	-0.0416976	-0.139061	0.285518	0.300376	-0.0258362	-0.163042	-0.152324	-0.00246424	0.206793	0.0307766	0.204274	0.0339186	0.0237786	-0.0444507	0.195617	-0.0655791	0.0922036	-0.194813	USP28
ENSG00000048052	CD8T15	-0.0806369	-0.167052	0.198046	-0.11045	-0.024452	0.193551	0.337687	0.103369	0.216054	0.164887	0.267125	0.0425625	-0.0541494	-0.0312291	0.202722	0.375801	0.147652	0.0400959	0.0500828	0.124559	HDAC9
ENSG00000048140	grey	0.0450636	0.148384	0.0427476	0.0394334	-0.0588729	-0.0147521	0.0262191	0.0474517	0.113896	0.024229	0.0579384	0.0146384	0.100103	0.0911867	0.121827	0.0809264	0.124678	0.0957343	-0.0233082	0.122904	TSPAN17
ENSG00000048342	grey	0.0130524	0.0349251	0.0378886	-0.0236653	-0.00905905	-0.00375155	0.00242239	-0.0753487	-0.00494136	0.0757891	-0.0286459	0.0464567	0.0183102	-0.0826654	-0.0423819	-0.0724136	-0.207218	0.0209447	0.0669689	0.0382945	CC2D2A
ENSG00000048392	grey	0.0257753	-0.0414666	-0.0693548	-0.083753	-0.00733406	-0.0341857	0.0679284	0.0378936	0.115901	-0.056489	0.0535265	0.0157638	0.045179	0.0779789	0.107135	0.0716205	0.146903	0.0717823	-0.00739043	0.000599945	RRM2B
ENSG00000048405	grey	-0.00599557	-0.0546247	-0.0496053	-0.0157836	0.0415807	0.114907	0.000186044	0.0104039	0.000658966	0.0453755	0.00811758	0.0107225	0.0790778	-0.116516	0.00377216	-0.0026225	-0.0319927	-0.0667143	-0.0184883	-0.00911906	ZNF800
ENSG00000048471	grey	-0.0957946	-0.0692351	-0.0203104	-0.00958718	0.0609157	0.0223766	0.127852	0.0378519	0.010346	0.0382801	0.0083613	-0.0233071	-0.0625983	-0.0299937	0.112058	0.0457963	0.0154217	-0.0457533	0.0813964	0.0667218	SNX29
ENSG00000048540	grey	-0.0708478	-0.0215267	0.0179067	0.0499037	0.133928	0.0351019	0.113283	0.178898	0.0411809	0.0945676	0.0359522	0.00151789	0.0482972	0.0487329	0.0191095	0.0860132	-0.0231802	0.129351	0.147465	0.028538	LMO3
ENSG00000048544	CD8T19	-0.0909442	-0.0550577	0.0878319	0.093259	-0.0674097	-0.026163	0.024299	0.0440554	0.0392041	-0.0224721	-0.0497014	-0.0303023	0.00167742	0.00287966	-0.00441425	0.0788654	-0.140535	0.0110354	0.0119326	0.121605	MRPS10
ENSG00000186854	CD8T4	-0.14452	-0.0342005	0.00381519	0.347292	-0.0827052	-0.207884	-0.0669171	0.115332	-0.0120164	0.0355363	-0.305825	0.00609545	-0.167019	0.00588307	-0.109939	-0.0493524	-0.175082	0.0318413	0.0557489	0.0628406	TRABD2A
ENSG00000048707	grey	0.102164	0.0064967	0.043676	0.0222665	0.21698	0.0828237	-0.0170988	-0.0886886	-0.212753	-0.0626179	0.0886271	0.0331956	0.119669	-0.00203578	-0.0930911	-0.0602456	0.0302723	-0.0227622	0.0449858	-0.0764436	VPS13D
ENSG00000185697	CD8T4	0.0224051	0.0982592	-8.04583e-05	0.345259	0.12602	-0.0961724	-0.00991691	0.0442604	-0.0164142	0.0364977	-0.191297	0.109849	0.00405472	0.10989	-0.103997	-0.0457037	-0.202269	0.0353237	0.313848	0.211367	MYBL1
ENSG00000048828	CD8T17	0.0423892	0.116844	0.155457	0.135857	-0.129452	0.0105318	0.0750524	0.161393	0.216401	0.0507834	-0.0274767	0.1083	0.0508047	0.184587	0.0228103	0.148871	0.100554	0.189139	0.0179267	0.0689375	FAM120A
ENSG00000048991	grey	-0.0325538	0.0158304	0.0801145	-0.0159689	-0.101536	-0.0223168	0.121142	-0.0476725	-0.123276	0.0728569	-0.0362764	0.035511	-0.110668	-0.0413724	-0.127188	0.0910555	-0.0522718	-0.0494129	-0.0924938	0.0281887	R3HDM1
ENSG00000049167	CD8T14	-0.132295	-0.0969907	0.024748	-0.102106	0.0513497	0.0161991	-0.0255439	0.000358033	-0.035799	0.076636	0.131797	0.0449194	-0.0320268	-0.00641246	0.165498	0.0151028	-0.0214858	-0.080884	-0.07874	0.0642812	ERCC8
ENSG00000249993	CD8T4	-0.166228	0.00183673	0.121561	0.344784	-0.146768	-0.163648	0.0451634	0.151147	0.0729201	0.120756	-0.22106	-0.0409698	-0.0994187	0.174852	-0.0704686	0.041083	-0.0970661	0.0692491	-0.0282044	0.101204	BFSP2-AS1
ENSG00000049239	grey	-0.0569176	-0.0130181	0.113499	0.00730281	-0.0623244	-0.0473717	-0.0197564	-0.0215882	0.1053	-0.0120806	-0.0898216	0.0568961	-0.0505143	-0.00717133	0.0319525	0.0484841	-0.0714229	0.0694157	0.0549119	0.0152901	H6PD
ENSG00000049245	CD8T6	-0.0378172	-0.0620207	0.028829	-0.0503573	0.109745	0.118514	-0.00785777	-0.0953168	-0.000682277	0.109409	0.0477978	0.035507	0.0117951	0.00816661	0.0573879	0.0264646	0.0818463	-0.0354474	-0.0545189	0.022444	VAMP3
ENSG00000049246	grey	0.00325092	0.0498778	0.0490435	-0.049514	0.00706759	0.174593	0.00945939	-0.092871	-0.0234989	0.0177808	-0.0187443	0.154548	0.102839	-0.0543608	0.101265	-0.0370903	-0.0315182	-0.0235005	-0.0977512	0.00609477	PER3
ENSG00000049618	CD8T8	-0.130707	-0.22212	0.0545383	-0.00546076	-0.125313	0.0248422	-0.0560952	0.04567	0.102208	-0.036342	0.030766	-0.105712	-0.134036	-0.00130087	0.0706382	0.212841	0.120031	-0.0845299	-0.0438783	0.0922518	ARID1B
ENSG00000049656	CD8T6	0.148582	0.110296	-0.090665	-0.162763	0.0340162	0.17508	0.0316228	-0.0954621	-0.0657229	0.0256432	0.104603	0.0632619	0.131566	0.0809603	0.111775	0.00234739	0.125688	0.0632887	-0.0341942	-0.0568936	CLPTM1L
ENSG00000049759	CD8T17	0.0363813	0.0156222	-0.0795708	-0.080244	-0.0665884	-0.063519	0.0680136	0.106072	0.0450126	0.0110009	0.0217512	-0.0324956	-0.0507363	-0.0646473	0.0791767	0.0336505	-0.0199091	0.180273	-0.000984221	0.0533327	NEDD4L
ENSG00000049769	CD8T18	-0.0264532	0.00625948	0.0806419	0.0850128	0.0128718	0.082069	-0.00220985	0.12245	0.079403	-0.11177	0.013006	0.0069635	0.0276937	-0.075684	0.0325542	0.188692	0.0280119	-0.0113228	0.153212	0.0775144	PPP1R3F
ENSG00000049860	grey	0.173111	0.0840205	-0.00877968	-0.0514031	0.00381724	0.00319652	0.125391	0.0505727	-0.0115785	-0.033606	0.0566644	-0.0105736	0.0812418	-0.0019238	0.0540067	0.00226833	0.0392418	0.180564	-0.0318198	-0.024036	HEXB
ENSG00000050030	grey	-0.0743111	-0.0506245	0.0609299	-0.0142847	0.125936	-0.00160405	0.0195237	-0.0324163	-0.0123533	0.0910067	0.0441905	0.00194052	0.0366083	-0.0646845	0.0083598	-0.0554313	-0.16693	0.0108511	0.0902705	-0.0370541	NEXMIF
ENSG00000050130	CD8T1	0.153035	0.0926718	-0.0569728	0.00863848	0.0603296	0.0321239	-0.0398995	0.0781282	-0.043431	-0.0572138	0.0526163	0.0412248	0.119067	-0.0435655	0.0146264	0.00219027	0.0344479	-0.0176639	0.0658847	-0.116857	JKAMP
ENSG00000050165	CD8T12	0.0599176	0.102688	-0.0272526	-0.106149	0.0956318	0.134394	0.152119	-0.148115	-0.0383564	0.15767	0.118511	-0.0200632	0.169704	-0.0853802	0.0947835	-0.102521	0.0110405	0.0446589	0.115646	-0.0499813	DKK3
ENSG00000050344	grey	-0.00711162	-0.0460466	-0.0512529	-0.124684	0.049415	0.0564588	0.0279607	-0.0220969	-0.116271	-0.0648888	0.0686452	-0.114205	0.0460141	-0.180021	-0.0392191	0.0468526	0.000276717	-0.111107	-0.0435315	-0.0402255	NFE2L3
ENSG00000050393	CD8T13	0.0972682	0.177372	0.0315875	0.0304164	0.0196	-0.0224645	-0.0351125	-0.0558353	-0.0510551	0.0997719	-0.0971703	0.0218382	-0.016653	0.0613347	-0.0459048	-0.102959	-0.0992578	-0.0460823	-0.0237641	-0.0288983	MCUR1
ENSG00000050405	grey	-0.0921891	-0.0801878	-0.0299021	-0.011395	-0.0108415	-0.0346799	0.00931727	0.0250255	-0.0202425	0.0627356	0.0134552	-0.0443835	0.0146986	-0.0173214	0.0378695	0.00429728	-0.0884648	-0.0763325	-0.00322314	-0.013767	LIMA1
ENSG00000050426	grey	-0.0377598	-0.0132733	0.0271272	0.0437592	0.0680425	0.0398843	0.163447	0.106498	0.0892261	0.153937	0.0322967	0.0214155	0.0588732	-0.0468877	0.102204	0.022962	-0.0742618	0.0171309	-0.0439936	0.208449	LETMD1
ENSG00000050438	grey	0.0249933	0.0602362	-0.000965549	0.0601194	-0.0649939	0.0856266	-0.0240088	-0.027193	-0.031656	0.0712744	-0.109336	0.0612643	-0.0404836	-0.0387034	-0.126286	-0.0794595	-0.0738744	-0.0740457	-0.000965545	-0.0364537	SLC4A8
ENSG00000050730	CD8T10	0.3468	0.0995751	-0.135388	-0.334669	0.154352	0.123283	0.0320232	-0.0862906	-0.00952756	-0.0666971	0.393651	-0.00584785	0.295174	-0.00509187	0.244676	-0.0483222	0.198194	0.256154	-0.0456581	-0.225432	TNIP3
ENSG00000050748	grey	0.0825395	-0.0379645	-0.0236785	-0.0595931	0.0604589	0.056462	0.0512364	0.0603751	-0.0015936	0.0424076	0.154342	-0.0410569	-0.0118675	-0.0605907	0.0406902	0.0144032	0.027952	-0.03418	-0.0699266	-0.0449221	MAPK9
ENSG00000051009	grey	-0.0069314	0.0124715	0.0403965	-0.127528	-0.0135283	0.155188	0.150035	-0.0819823	0.0410183	0.165221	0.134244	0.00898462	0.00800672	-0.0499496	0.0632925	0.0627445	0.0578615	0.0304367	-0.0382419	-0.0408837	FHIP1B
ENSG00000051108	CD8T5	0.173593	0.113285	-0.117846	0.012826	0.156081	0.051082	-0.00641665	-0.0488158	-0.0189401	-0.00631532	0.0478394	0.00993778	0.0951502	-0.0845731	-0.071557	-0.112146	-0.032981	0.0590822	0.127905	-0.0595987	HERPUD1
ENSG00000051382	grey	-0.0820121	-0.0832975	0.0082983	-0.00675611	0.0233883	0.0954117	0.1364	0.115098	0.0425781	0.0361007	0.113758	-0.0128053	0.0646103	-0.0910901	0.0447694	0.073606	-0.0292484	-0.0247486	0.0506906	0.00764494	PIK3CB
ENSG00000063177	CD8T2	0.379993	0.587125	-0.0135507	0.161617	0.0118188	-0.0159934	-0.0202692	-0.0372515	-0.0768774	0.0816026	-0.128495	0.184298	0.188413	0.211543	-0.0376682	-0.229128	0.000967909	0.195985	0.0320953	-0.0670881	RPL18
ENSG00000051596	CD8T3	-0.0275933	-0.0486785	0.204686	0.0966092	-0.0393131	-0.0114208	0.0134883	0.10474	0.109549	0.00180884	-0.0475762	0.0118624	-0.00712175	-0.0160066	-0.0663959	0.0729127	0.0254084	-0.00483562	-0.00200195	0.0341221	THOC3
ENSG00000051620	grey	0.0151938	0.084702	0.0356911	0.0331813	0.0820936	0.0590554	0.0558475	0.199766	-0.0331454	-0.0192223	0.00786246	0.0285475	0.0279558	0.019903	0.0868891	0.159762	0.0303668	-0.0274495	0.0834027	0.0153149	HEBP2
ENSG00000051825	CD8T9	0.0280319	0.00233283	0.0714356	0.0476077	-0.102333	0.0799098	0.101765	0.0232438	0.0204159	0.0923223	0.0333252	0.12388	-0.0310403	0.0524945	-0.000630785	0.0490121	0.0872268	-0.00670265	0.073611	0.0413457	MPHOSPH9
ENSG00000052126	grey	0.0322362	-0.0104406	-0.134459	-0.0675452	-0.0561574	0.0113147	0.0370902	0.0155335	0.033902	0.107954	0.0751136	-0.0374236	0.0793056	0.0371914	-0.0111724	-0.0508463	0.0202625	0.0144574	0.0535971	0.0321339	PLEKHA5
ENSG00000052723	grey	0.0277616	0.133476	0.175827	0.101393	0.0447324	0.0559799	0.0495034	0.114391	0.00503081	0.0652047	-0.0357164	0.00874861	0.025637	0.00894847	-0.0329815	0.0817695	0.00718058	-0.0421856	0.088798	0.0262022	SIKE1
ENSG00000052749	grey	-0.0663688	-0.116799	0.0893233	0.00325606	-0.0194677	0.100849	-0.0335228	0.0574045	0.0837	-0.0689309	-0.00121179	-0.0636096	-0.0797506	-0.0351354	-0.0204007	0.129639	0.0356586	-0.132708	-0.00543456	0.0549333	RRP12
ENSG00000052795	grey	-0.0820464	-0.0179289	0.0922696	0.0550945	0.00359093	0.0649528	0.0703082	0.0399013	0.101453	0.0844957	-0.00795847	0.0831545	-0.0222317	0.113858	0.0400717	0.0291576	-0.0185387	-0.0620167	0.0233544	0.0828624	FNIP2
ENSG00000052841	grey	0.0542736	0.0221538	0.0700301	0.067569	-0.0938483	0.103022	0.131251	0.0419296	0.0518229	0.146317	0.104152	0.103158	0.0315536	0.15139	0.0187693	0.0823325	0.213637	-0.00713739	0.0221961	0.0701932	TTC17
ENSG00000053108	grey	-0.187538	-0.101532	0.131954	0.0744534	-0.0798747	0.154499	0.217546	0.0584421	0.102499	0.232949	0.0191336	0.100955	-0.00166767	-0.0374247	0.0748961	0.146152	-0.0359778	-0.0470785	-0.0302288	0.243393	FSTL4
ENSG00000053254	CD8T6	-0.102101	-0.198169	0.0243499	-0.109616	0.0957057	0.161686	0.0605958	-0.0869573	-0.0948539	-0.00690645	0.120254	-0.0942358	0.0102501	-0.169531	0.010155	0.0608704	0.0693629	-0.1151	-0.0544631	-0.174603	FOXN3
ENSG00000053328	CD8T13	-0.0186014	-0.0347878	-0.0123462	0.0406625	0.056521	-0.0644552	-0.0407072	0.0489932	-0.0651737	-0.0126037	0.0231871	-0.0261677	-0.0406524	0.0735993	-0.0409688	-0.0408101	-0.00296071	0.0616809	0.0922506	-0.00608638	METTL24
ENSG00000053524	CD8T3	-0.0736822	-0.0149421	0.220856	-0.038489	-0.0644821	0.0221121	0.0192334	-0.0487981	-0.0208147	0.234123	0.00197961	0.110829	-0.0296882	-0.0153748	0.103412	0.0330009	0.0210298	-0.0647092	-0.0276865	0.115186	MCF2L2
ENSG00000053770	grey	-0.0119986	0.0963618	0.0525709	0.00408446	0.00456748	0.000467687	0.00526581	-0.00594362	-0.0414346	0.0373846	-0.0245525	-0.0261969	-0.0155368	0.0940133	-0.0229199	0.0340189	-0.0698593	0.0428694	-0.0176705	0.0231936	AP5M1
ENSG00000053900	CD8T13	-0.0111745	-0.00368185	0.00989104	-0.0242285	-0.0694737	-0.0227084	0.0060526	-0.0731526	9.11678e-06	0.0140132	-0.0265187	0.0765031	0.0212081	0.127609	0.0393277	-0.00653268	0.0630551	0.111474	-0.0702885	-0.0169872	ANAPC4
ENSG00000083457	CD8T4	-0.136756	0.0918773	0.0735328	0.339264	-0.228765	-0.182411	-0.0521484	0.0478066	0.0502447	0.11005	-0.313862	0.0794854	-0.0529916	0.244599	-0.0392596	-0.08865	-0.203876	0.0612319	-0.0534389	0.0874771	ITGAE
ENSG00000054116	grey	0.0207988	-0.000295049	0.0189381	-0.00323071	0.0689162	-0.049895	0.0456382	0.079265	-0.0494029	0.010873	-0.00392731	0.0742768	0.013077	0.0672484	0.0281842	-0.0254117	-0.0363825	0.0492149	0.153466	-0.0337053	TRAPPC3
ENSG00000054118	grey	0.0313607	-0.068688	0.0769892	-0.0288571	0.00308029	0.00117874	-0.0182625	-0.012625	0.0622484	-0.0374447	0.10863	-0.00586327	0.0696453	-0.0375869	-0.0779504	0.0169134	0.054076	0.0597572	0.0372433	-0.0329368	THRAP3
ENSG00000134419	CD8T2	0.310276	0.586878	-0.0668075	0.0301991	0.0432486	0.0535532	-0.103838	0.0103171	-0.00589445	-0.0186261	-0.0427982	0.164837	0.097073	0.144136	0.0674659	-0.095441	0.0443422	0.0423642	0.0139452	-0.072048	RPS15A
ENSG00000054219	grey	-0.0623896	-0.0522762	0.0753134	0.144561	-0.0396558	0.0489079	0.0473305	0.172061	0.194691	-0.0340486	-0.00733578	0.00567984	-0.0268232	0.116464	-0.0358985	0.0825628	0.126312	-0.0311777	0.0790389	0.0821304	LY75
ENSG00000054267	grey	0.0734496	-0.0236955	-0.0992894	-0.0355935	0.124047	0.0345966	-0.0399777	0.0100195	0.0424992	-0.0646024	0.0642114	-0.0886213	0.0778818	-0.047095	-0.000888705	-0.00984995	0.0130626	0.0292271	0.0556753	-0.0467995	ARID4B
ENSG00000054277	grey	0.141741	0.063118	-0.043047	-0.0680468	0.00179779	-0.00438402	0.0236345	0.0106718	0.056178	-0.0546414	0.0188192	0.0113821	0.0356014	-0.0190276	-0.0513181	0.0103711	0.0548365	0.0233482	0.0561414	0.0431619	OPN3
ENSG00000054282	grey	0.0787486	-0.0368433	0.052131	0.0112656	0.131706	0.101832	0.259197	0.0343718	0.0614144	0.109396	0.153583	0.072012	0.0660867	-0.020644	0.0251691	0.122443	0.0622092	0.0334556	0.079929	0.0635125	SDCCAG8
ENSG00000054356	CD8T13	-0.0968398	-0.0675488	0.0857174	0.114006	-0.0274587	-0.0254153	0.106482	0.0242932	0.104431	0.188685	-0.102969	0.128358	-0.14661	0.0978991	-0.0149823	0.08207	0.000136028	0.0439402	0.0239346	0.26495	PTPRN
ENSG00000054392	CD8T13	-0.018846	-0.0976558	-0.0454833	0.0228157	-0.0579046	-0.0269408	-0.0513208	-0.0589387	-0.0594714	0.0133292	-0.0384394	-0.0972105	-0.00672236	0.0603696	-0.064435	-0.117815	0.030454	0.0488191	-0.0729688	-0.0426668	HHAT
ENSG00000054523	grey	-0.0103649	-0.062651	0.0341978	0.0197077	0.0574129	0.0779274	0.0916347	0.0230846	0.116825	0.0688775	0.0491661	0.026929	0.0504256	-0.00152808	0.0332502	0.0596013	0.0813715	-0.0325273	0.0383503	0.10679	KIF1B
ENSG00000054611	CD8T15	-0.252655	-0.226581	-0.0135293	0.0780418	-0.0166099	-0.0677942	0.0852863	0.179216	0.0524327	-0.106895	0.00993335	-0.0280838	-0.085461	-0.059799	0.0930578	0.285499	0.053377	0.00370865	0.0524484	0.122871	TBC1D22A
ENSG00000151623	CD8T4	-0.123153	-0.0921355	0.0526187	0.33858	-0.122605	-0.20453	-0.0462005	0.0794622	0.143205	0.0387939	-0.297826	0.0776782	-0.160664	0.215382	-0.20038	-0.13928	-0.144279	0.0774227	0.0784168	0.188769	NR3C2
ENSG00000054690	grey	-0.075568	-0.0870708	0.156078	0.119623	-0.0356956	0.00184586	0.144854	0.100889	0.120342	0.171567	0.118092	-0.0748552	0.00957577	0.0782657	0.0103705	0.147213	0.124785	0.108599	-0.00672858	0.0558901	PLEKHH1
ENSG00000054793	grey	0.00418386	-0.0358199	0.0320093	-0.0398774	0.00227509	0.0597019	0.109282	-0.0113464	-0.00818041	0.0741414	0.100733	0.00797496	0.110341	-0.0645661	0.0861068	0.0157607	0.0293584	0.0805506	-0.0338637	0.0320151	ATP9A
ENSG00000054965	CD8T13	0.0247562	0.000212134	0.0992759	0.0892815	-0.0852364	0.0482819	0.0581921	-0.0157837	0.000547781	-0.0402597	-0.0438667	0.0762132	0.0211965	0.20496	-0.04258	-0.0461745	0.087547	-0.0311913	-0.0912943	0.0845541	FAM168A
ENSG00000054967	grey	-0.10235	-0.0966306	0.0733781	0.0819581	-0.0465503	0.0185432	0.179656	0.108041	0.0546501	0.0819317	0.00358071	-0.00588295	-0.00903236	-0.0732817	-0.1298	0.208628	-0.00304522	0.0433945	0.0387537	0.141468	RELT
ENSG00000054983	grey	0.058027	0.0513242	-0.00461671	0.0551101	0.0227777	-0.0283077	0.0842497	0.0497822	-0.058337	-0.0150672	0.108977	-0.10839	0.0844557	0.0162254	-0.134058	0.0298775	0.018404	0.0600188	0.144134	0.0225281	GALC
ENSG00000055044	CD8T19	-0.124475	-0.148822	0.0945359	0.177746	-0.0339671	-0.0857066	-0.0578308	0.17456	0.0289207	-0.0793472	-0.0656666	-0.0525666	-0.183617	0.0159005	-0.124909	0.168175	0.0167835	-0.00666164	0.0911437	0.0821637	NOP58
ENSG00000055070	grey	0.0200287	0.114563	0.16423	-0.0130476	-0.0417487	0.139538	0.0427161	-0.0346679	-0.160747	0.00818461	-0.0301721	0.161417	-0.0118798	-0.0693745	-0.0561515	0.0837074	0.0585496	-0.16187	0.0419707	0.00790262	SZRD1
ENSG00000055130	grey	0.00196396	-0.0651403	0.0682605	0.0340428	-0.0174967	0.0341389	0.0711942	0.129735	-0.0149358	-0.0126495	0.00537318	-0.0477915	-0.0527499	0.0704944	0.0448068	0.126603	0.0616185	-0.0142213	-0.00876036	0.0436191	CUL1
ENSG00000055147	grey	0.0720196	0.0918251	0.0292876	-0.00124407	0.0179233	-0.0359117	0.00505033	0.0301859	-0.0408964	-0.00268578	-0.0345789	0.0180934	-0.019476	0.0688473	-0.0826695	-0.0908508	0.0302362	0.08426	0.0192551	-0.0325987	FAM114A2
ENSG00000055163	CD8T15	-0.0210125	-0.0336833	0.0791289	-0.000583314	-0.0794345	0.108519	-0.0350562	0.0707999	0.0150641	0.0544497	0.0270184	0.0980977	-0.057046	0.0162487	-0.00154822	0.183087	0.0580332	-0.0838108	0.0562769	0.0434409	CYFIP2
ENSG00000055208	CD8T10	0.0957237	-0.00262626	-0.0389469	-0.10345	0.0893234	0.12859	0.0588882	0.00679524	0.00801996	-0.0368339	0.258451	-0.0741839	0.223141	-0.0659841	0.0573127	0.022028	0.106666	-0.0219876	-0.0184238	-0.0622858	TAB2
ENSG00000055211	CD8T6	0.088464	0.0848879	0.00700047	-0.126095	0.0562904	0.0694091	0.0993458	0.0319421	0.0210039	0.0699368	0.131688	0.068101	0.0962374	-0.0557475	0.286897	0.0582199	0.0460603	0.106322	-0.0864519	-0.0190931	GINM1
ENSG00000055332	CD8T13	-0.00812502	-0.0500581	0.129465	0.144343	-0.107666	-0.023348	0.0334426	0.100117	0.135235	0.127222	-0.0595251	0.108342	0.0306425	0.1913	0.0185717	-0.0302698	0.0553497	0.0589106	0.0111306	0.0782546	EIF2AK2
ENSG00000055483	CD8T10	0.0564548	0.0152769	-0.0494947	0.00405112	0.0417782	0.0472857	0.093274	0.050459	-0.0762032	-0.0104369	0.0776163	-0.0448322	0.139259	-0.122698	-0.0236327	0.0519966	-0.018668	0.0650577	0.0404312	0.0254682	USP36
ENSG00000055609	grey	-0.0946589	-0.0915972	0.0609156	0.23308	0.134703	-0.0247944	0.0827339	0.191116	0.0931173	-0.0197696	-0.0364618	-0.00986006	-0.00748252	0.109321	0.0563979	0.0850566	0.0274994	-0.00937471	0.0556547	0.0747241	KMT2C
ENSG00000055813	grey	-0.0696416	-0.117503	-0.0315629	-0.000900286	-0.151761	0.041903	0.0342167	-0.0100381	-0.0631165	0.234586	0.00802463	-0.0211718	-0.0336529	0.0436072	0.0146696	-0.09559	-0.0188309	-0.00131801	-0.0999502	0.0552217	CCDC85A
ENSG00000055917	grey	0.00231454	-0.0906875	0.0227804	-0.0326563	0.120386	0.14165	0.0157049	-0.00276531	0.041941	-0.0464474	0.100498	-0.0278864	0.0647926	0.0356252	0.08157	0.0653937	0.16228	-0.0482439	0.0139191	0.0255567	PUM2
ENSG00000055950	CD8T16	0.0719927	0.00748059	-0.0723844	-0.0150698	0.0291999	-0.0201453	0.0348863	-0.0483438	0.0142244	0.0269237	0.0554739	0.0188144	0.0147499	0.0109898	-0.0241281	-0.0326754	0.120384	-0.00562657	0.0436865	0.155065	MRPL43
ENSG00000056050	CD8T3	-0.0851523	-0.0424347	0.262474	0.0177425	-0.0964426	0.0946677	0.0470624	0.108522	0.124667	0.149536	0.0108628	0.100735	-0.0643272	0.0429928	-0.0369234	0.151774	0.0808	0.0158624	-0.0861886	0.00688914	HPF1
ENSG00000056097	CD8T14	-0.0207187	0.0121875	0.00108986	0.0235828	0.0608822	0.0673492	-0.0176772	0.0685679	0.0282095	-0.0741109	0.037955	-0.0518323	0.0691804	0.0488854	0.0512207	0.0263935	0.0279419	-0.0715479	0.00119575	0.0267156	ZFR
ENSG00000056277	CD8T13	-0.0591336	0.0779491	0.0257338	-0.00242001	0.0182002	-0.0806609	-0.0642157	-0.0778626	0.02564	0.0722609	-0.0911148	0.052889	-0.0664936	0.0988129	0.0199854	-0.0356666	-0.0805681	-0.00889101	-0.0595461	-0.0211932	ZNF280C
ENSG00000056558	CD8T9	-0.0646742	-0.0644982	0.0296199	0.0316557	0.0948032	-0.0221993	0.0521352	-0.0362197	-0.041554	0.00537152	-0.0355384	0.0283186	0.072049	0.125226	0.0232723	-0.0602953	-0.0244068	0.00662059	-0.0637843	0.0810069	TRAF1
ENSG00000056586	grey	-0.0338628	-0.0531889	-0.0283894	-0.167085	0.0902269	0.0929365	0.0346246	-0.0047787	-0.0254199	-0.0527701	0.146389	0.0574991	0.0413127	-0.0277459	0.145957	0.164814	0.0773957	0.015047	0.0582397	0.0260576	RC3H2
ENSG00000130255	CD8T2	0.418682	0.583932	-0.120203	0.00897134	0.0679427	0.114013	-0.085974	-0.0877121	-0.0292486	-0.0429794	-0.0348848	0.163547	0.203247	0.117797	0.0075336	-0.183207	0.0976481	0.117681	-0.0496665	-0.0755818	RPL36
ENSG00000057252	grey	0.0367886	0.0662058	0.0952779	0.0998584	0.0137315	0.0157215	0.0679804	0.0213482	0.00115194	0.0477266	0.0305679	0.0813408	0.0579484	0.0542066	0.000240755	0.0143613	0.0851521	0.0331305	0.100621	-0.0527925	SOAT1
ENSG00000057468	CD8T6	0.0344468	0.0208686	0.052645	-0.080608	-0.028482	0.178293	0.00966673	-0.0769942	0.0103018	-0.012782	0.0667492	0.0665846	0.00910663	-0.0791376	0.0545629	0.111414	0.0670676	-0.0462405	-0.00632475	-0.0233467	MSH4
ENSG00000057608	grey	-0.0809281	-0.0680663	-0.0185108	-0.00436293	-0.0128061	-0.0253215	-0.0281942	0.0485316	0.0628252	0.0071678	-0.0141087	-0.00821831	-0.0532923	0.0664834	-0.0056759	0.0159171	-0.102005	0.0128796	0.0195889	0.0540704	GDI2
ENSG00000172175	CD8T4	-0.105174	0.0120616	0.143	0.338344	-0.13596	-0.0747832	-0.0833438	0.0260982	-0.0118612	-0.00453329	-0.207407	-0.0037084	-0.112172	0.080104	-0.125576	0.0572263	-0.0658691	-0.0671466	0.00563847	0.0796332	MALT1
ENSG00000057663	CD8T6	0.00266046	-0.0895473	-0.0377974	-0.0233692	0.194501	0.138718	0.0539077	-0.0183183	-0.0542936	-0.0702604	0.068355	-0.127401	0.1198	-0.0309451	0.0172527	-0.000419201	0.111559	-0.12423	0.0731793	0.00102639	ATG5
ENSG00000143947	CD8T2	0.397336	0.581963	-0.0266354	0.0162175	0.0804838	0.0481182	-0.0464275	-0.0859388	-0.0522613	0.0162976	-0.0423478	0.252279	0.141026	0.102739	0.0296871	-0.129346	0.0712172	0.204214	0.0857077	-0.119668	RPS27A
ENSG00000057757	grey	0.0271625	0.0567278	-0.035029	-0.0781383	0.0949305	-0.119882	-0.0776512	-0.0558949	-0.0160127	-0.0540893	0.0154381	-0.100526	0.121042	-0.0685491	-0.091279	-0.121236	-0.170798	0.105746	-0.0389071	-0.0740192	PITHD1
ENSG00000057935	grey	-0.0626516	-0.0902574	0.0214375	-0.0205912	0.0263641	-0.0203882	0.12381	0.123081	0.052561	0.037109	0.138092	0.0065484	0.049903	-0.00982648	-0.0389858	0.0954455	0.0017909	0.00222566	-0.0171806	0.00436759	MTA3
ENSG00000058056	grey	-0.0589352	-0.0754125	-0.033576	0.0476943	0.0110606	0.055162	-0.0483022	0.019432	-0.0703092	-0.100946	-0.0587809	-0.0181385	-0.0895366	-0.109437	-0.154157	0.0460171	-0.0352448	-0.101689	0.0836332	0.00458913	USP13
ENSG00000058063	grey	-0.0226449	-0.0298892	-0.110668	0.000632721	0.134842	0.00107003	-0.0118342	0.0989986	-0.0152919	-0.0308637	-0.0238269	0.00257792	0.0281263	-0.00184638	0.0397528	0.0344512	-0.00838981	0.071292	0.0810155	0.00389279	ATP11B
ENSG00000058091	grey	-0.0206828	-0.0112898	-0.0178869	0.0919578	-0.0359669	-0.00921049	0.10636	0.142652	0.203781	0.0507511	-0.0511527	0.0265125	-0.0801258	0.0271976	0.0118876	0.109524	0.0412934	0.262736	0.131086	0.101544	CDK14
ENSG00000058262	CD8T19	-0.0456313	0.0638181	0.0723234	0.092611	-0.0668287	-0.0285614	0.0409897	0.122661	0.032556	0.040891	-0.072899	0.05168	-0.0410029	0.046002	-0.0359712	0.173876	0.0226998	0.0025076	0.0894127	0.0724463	SEC61A1
ENSG00000058272	grey	-0.0494692	-0.0781528	0.0109869	-0.00339998	-0.0442169	0.0407504	-0.0385405	0.0255528	-0.0285253	-0.0247515	0.0441284	0.0229569	0.0344792	0.0542634	-0.0756604	0.0137418	0.097338	-0.124292	0.0265316	-0.074018	PPP1R12A
ENSG00000058335	CD8T8	-0.0506897	-0.072543	-0.0221134	-0.0853837	-0.00942063	-0.0355391	0.105889	0.0111916	0.402962	0.0926645	0.0518761	0.0237942	0.0302735	0.0924916	0.184387	0.0751606	0.0196015	0.0760116	0.000706622	0.195679	RASGRF1
ENSG00000058404	grey	-0.109154	-0.0511308	0.0108983	0.00129016	-0.0137183	-2.3921e-05	0.0602233	-0.0135661	0.0174329	0.0771017	0.0217327	0.0541451	-0.0376254	0.00899906	0.0680966	0.0194908	-0.111375	0.0547067	0.00266876	0.0840976	CAMK2B
ENSG00000058453	grey	0.103423	0.104262	-0.0655202	-0.021105	0.017401	0.0266305	0.0711847	0.0728691	-0.0177518	0.114982	0.0821459	0.0409364	-0.105238	0.0771767	0.0956899	-0.00708478	0.118273	0.0537095	-0.00544827	-0.0576735	CROCC
ENSG00000058600	grey	-0.147708	-0.122951	-0.084421	0.100151	0.0620081	-0.0788831	0.0708381	0.188385	0.0738379	-0.0196095	0.0115642	-0.139964	0.0205921	-0.0821858	-0.0722215	0.0742668	-0.0580393	-0.0179733	0.167487	0.0517239	POLR3E
ENSG00000058668	grey	0.0163466	-0.00536916	0.0441551	0.0989801	-0.0296285	-0.086066	0.00794599	-0.0463568	-0.0952412	0.0153545	-0.0952708	-0.0960713	0.0529659	0.0276317	-0.135541	0.0347826	-0.118502	0.0223938	0.0205434	-0.00441202	ATP2B4
ENSG00000058729	grey	-0.0465131	-0.0183471	0.142419	-0.0118602	0.0252321	0.113557	0.169509	-0.0238325	0.0154247	0.0394928	0.119333	0.0654735	0.151298	0.0568994	0.0565162	0.0900581	0.139576	-0.061001	0.00385297	0.0759029	RIOK2
ENSG00000058799	CD8T19	-0.0798235	-0.108371	0.130667	0.0699592	-0.026865	0.0539548	0.124617	0.0646753	0.0872766	0.0460436	0.083189	0.0954319	0.0563908	0.0373613	0.0681623	0.227615	0.0488347	-0.0241408	0.0321071	0.23389	YIPF1
ENSG00000058804	grey	-0.17181	-0.147522	0.0681664	0.0365526	-0.0975819	-0.0482056	-0.018191	0.0691148	0.144151	0.0480017	0.00770793	-0.0198243	-0.0309494	0.0390451	0.015798	0.0359435	-0.0108789	0.0332059	-0.0361799	-0.0318391	NDC1
ENSG00000058866	grey	0.00994179	-0.0303689	-0.0425749	-0.0147591	0.109357	0.0484822	0.154709	0.0430545	-0.0669789	0.00639781	0.0271989	-0.0661204	-0.00832207	0.00641251	0.0259716	-0.0167326	-0.0235584	-0.0108095	-0.00375828	-0.0462925	DGKG
ENSG00000059122	grey	-0.108406	-0.070824	0.13756	0.0302178	-0.153761	0.0249479	0.0507861	0.096526	0.224751	0.151867	0.0490593	0.0552007	-0.0278596	0.0486237	0.103793	0.086569	0.0477281	0.00880659	-0.0362254	0.0629294	FLYWCH1
ENSG00000059145	grey	-0.0895061	-0.0507841	0.0201979	-0.0273726	0.0346468	-0.0815835	-0.0916703	-0.0779836	0.0654012	-0.0476336	0.0431114	-0.0450738	0.029666	-0.00235594	-0.0540239	-0.0665291	-0.0484553	0.0609227	-0.00742866	-0.0899336	UNKL
ENSG00000059377	grey	-0.00965972	0.0339719	0.114773	-0.0395291	-0.0455211	0.201051	0.397404	-0.0430923	0.0214246	0.262525	0.181272	0.0395713	0.0810412	-0.0778226	0.0255704	0.0830628	0.0693023	-0.0394189	0.00412017	-0.0324416	TBXAS1
ENSG00000059378	CD8T9	-0.10744	-0.101947	0.0806806	0.0159696	-0.0646164	-0.066826	-0.015143	0.0561341	0.0266747	0.0380754	-0.0213683	-0.0203626	-0.00260826	0.0691652	-0.0383994	0.00821049	-0.0160084	0.00827185	-0.0391954	-0.0405769	PARP12
ENSG00000059573	CD8T13	0.00590186	0.0657275	-0.0422996	0.0190673	-0.0722074	-0.10876	-0.0084411	-0.0792062	0.0608043	0.0672901	-0.0998886	-0.0738352	-0.0728833	0.108069	-0.0400064	-0.0460516	-0.0725362	0.024	-0.0882951	0.0527486	ALDH18A1
ENSG00000059588	grey	0.0258607	0.0269017	-0.0354241	0.0239314	0.0395239	-0.0468242	0.0454149	0.055007	0.0464744	0.0947893	0.0157882	0.0228545	0.0662587	0.068273	0.0736442	-0.109305	0.0070128	0.113636	-0.0910342	-0.072958	TARBP1
ENSG00000059691	grey	-0.0173063	-0.0521647	0.0289019	-0.121819	-0.0419625	0.0925467	-0.00149088	0.021044	0.0680401	0.0231046	0.106258	-0.0523556	-0.0165712	0.0065945	-0.000249706	0.0142507	0.0814235	0.0372639	-0.0448232	-0.164135	GATB
ENSG00000059728	CD8T6	-0.0489671	-0.0227173	0.0570834	-0.000686198	-0.0146799	0.128106	0.0159708	-0.0755239	-0.110804	0.0245659	0.089381	-0.0135219	0.0304912	-0.0582118	-0.112839	0.0662418	0.0760878	-0.141099	0.0582806	-0.0282259	MXD1
ENSG00000059758	grey	-0.0348868	-0.125679	0.0263043	0.0634874	0.14489	-0.0659121	-0.0386649	0.132502	-0.0206488	-0.118183	0.0437839	-0.0711051	-0.0807643	-0.0141555	-0.0354309	0.0906308	-0.0218251	-0.0390439	0.156354	0.0707314	CDK17
ENSG00000059769	grey	0.0576248	0.0585577	-0.0251114	-0.0621056	-0.0159016	-0.0598628	0.0502869	-0.12548	-0.0379105	-0.0508421	0.0740782	-0.0485008	0.0516855	0.0138304	0.0335204	-0.086232	-0.0171986	0.0595539	-0.00890587	0.0395246	DNAJC25
ENSG00000059804	grey	-0.0792855	-0.0239013	0.0225371	-0.0116085	0.116471	-0.0390569	0.00580053	-0.033737	-0.114181	-0.0803598	-0.0611395	-0.0620962	-0.0157032	-0.163031	-0.0788754	0.0432164	-0.128863	-0.0206239	0.0577776	0.0301906	SLC2A3
ENSG00000059915	grey	0.0132039	0.0263206	0.0256075	0.0268471	0.0341186	0.0149898	0.0935875	0.0978902	0.0317201	0.0696214	0.00707583	0.0663758	0.0198134	0.0450031	0.0429449	0.00492366	-0.0252481	0.0736417	-0.00347389	-0.00474383	PSD
ENSG00000060069	grey	0.0936375	0.079248	0.0990191	0.0280272	0.0509424	0.0545562	0.0512174	0.0719736	0.0135356	-0.00213903	0.117646	0.033053	0.175798	-0.0412717	0.133122	0.050735	0.0408413	0.0950104	0.0558471	0.0989736	CTDP1
ENSG00000060138	grey	-0.0505697	-0.0116071	0.0140124	0.127823	0.115555	0.0129236	-0.033312	-0.0319505	-0.0240215	0.0737769	-0.0996726	0.0418076	-0.0449687	0.0387055	0.0162607	-0.0101218	-0.121414	0.0582715	0.0972882	-0.0951814	YBX3
ENSG00000060140	grey	-0.0343755	-0.0333836	0.0153245	0.0798289	-0.207433	0.00506659	-0.0607701	-0.00257473	-0.0118799	-0.000257313	-0.102991	0.0943227	-0.11323	0.0492078	0.0446368	0.00628208	0.022709	-0.08346	-0.0350012	0.0379228	STYK1
ENSG00000060237	CD8T14	0.0920746	-0.0120223	0.00215623	-0.178045	-0.0181985	0.0688131	0.0361127	-0.0242403	-0.000470501	0.000705675	0.194247	0.00573349	0.142272	0.04016	0.274336	0.0785306	0.152059	0.0674414	-0.147582	-0.101135	WNK1
ENSG00000060339	CD8T6	-0.1247	-0.0980278	0.0332085	-0.095709	0.00904925	0.0213309	-0.0162371	-0.0435006	-0.056106	0.0521552	0.0437644	0.0033675	-0.0917085	-0.0722568	0.0975079	0.0517772	0.00986466	-0.0909621	-0.0330939	-0.00524154	CCAR1
ENSG00000060491	grey	-0.0305331	0.0618622	-0.0251953	0.0434379	0.000644496	-0.0328743	-0.0615191	-0.0853569	-0.114864	-0.119927	-0.025228	-0.0712249	0.0210323	-0.0430676	-0.14002	-0.0679175	-0.00548825	-0.0622377	-0.00893008	-0.0239615	OGFR
ENSG00000060688	grey	0.0662698	-0.0349943	0.065872	-0.057566	0.0804925	0.0261521	-0.010136	0.0413945	-0.0618429	-0.0259433	0.116874	-0.00666637	-0.0258625	0.0251634	0.0199522	0.0618846	0.153269	-0.0174536	0.0392605	-0.0556597	SNRNP40
ENSG00000060709	CD8T11	-0.00479174	0.107411	0.0311972	-0.0165081	-0.0852873	-0.0153038	0.0302921	0.00648776	0.175895	0.0831866	-0.0689283	0.166065	-0.0195101	0.0593485	0.0815288	-0.0856489	-0.0278522	0.132541	0.0141396	0.0618362	RIMBP2
ENSG00000060749	grey	-0.0146873	-0.0266912	0.0642714	0.0862967	-0.116612	-0.0881217	0.101169	0.0359092	-0.0330418	0.0111662	-0.0872193	0.0347458	-0.0113809	0.0445019	-0.0554227	-0.0107518	0.0567621	-0.0302545	0.0354676	0.0943997	QSER1
ENSG00000060762	grey	-0.0394796	-0.0481165	0.0856386	0.111837	0.0328862	0.0441508	0.137308	0.048386	0.0797435	0.0430013	-0.00973367	0.00602152	0.0749289	0.100449	0.0433444	0.0262729	0.0762646	0.0268361	-0.0365565	0.0948424	MPC1
ENSG00000071073	CD8T4	-0.0727613	0.0387493	0.119179	0.334561	-0.0485392	-0.136049	-0.0708812	0.0387145	-0.0242091	0.0238976	-0.297422	0.0221653	-0.163196	0.125065	-0.171775	-0.0776713	-0.151189	0.0277565	0.12708	0.067666	MGAT4A
ENSG00000061273	grey	0.00307004	-0.0333713	-0.0374166	-0.115854	-0.0210877	0.114152	0.0894186	-0.0204099	0.0461392	0.00381049	0.136582	-0.0636845	0.0490299	-0.0532398	0.0725023	0.0911766	0.0176968	0.0297146	0.0519602	0.00539398	HDAC7
ENSG00000197892	CD8T4	-0.0855357	-0.034081	-0.00229204	0.33313	-0.119093	-0.14783	0.0221543	0.125616	0.0543377	0.0500688	-0.227929	0.156037	-0.141476	0.19654	-0.11604	-0.0224492	-0.028502	-0.00582508	0.0142216	0.067534	KIF13B
ENSG00000061676	CD8T7	-0.0284321	-0.0518241	0.0104434	0.0649674	0.0628328	-0.121314	-0.0675228	0.151295	-0.0202301	-0.0405002	-0.0790184	0.115535	-0.0925076	0.0984711	0.0389465	-0.0135502	-0.0292911	0.0719188	0.00759107	-0.024836	NCKAP1
ENSG00000035664	CD8T4	-0.227671	-0.00274414	0.138228	0.331944	-0.0504821	-0.155181	-0.0246524	0.123622	0.112815	0.0225969	-0.240603	0.0131375	-0.212737	0.0585855	-0.221943	0.0685498	-0.0623093	-0.0074548	0.159064	0.178138	DAPK2
ENSG00000061918	grey	-0.00524637	0.00210433	-0.0149647	-0.0434228	0.102673	-0.00118822	0.0458906	-0.0717803	-0.0616767	0.0649108	0.00317217	7.26435e-05	0.0464584	-0.00538797	-0.0325441	-0.0198109	-0.0812474	-0.0343923	0.12358	0.0635975	GUCY1B1
ENSG00000061936	grey	-0.101645	-0.14881	0.0918356	0.0038287	-0.050308	0.014694	0.12252	0.0442594	0.106158	0.0697308	0.102637	-0.0194678	-0.0391108	-0.0449237	0.108533	0.0903685	0.029374	0.0332304	-0.100001	0.151371	SFSWAP
ENSG00000061938	CD8T16	-0.00444273	0.00905627	0.0836612	-0.0103605	-0.0816141	0.0499581	0.0344355	-0.040826	0.0264523	0.0628313	0.0933935	0.0924778	0.0536266	0.0805493	0.0485783	0.0360466	0.208839	0.008426	-0.114246	0.0839383	TNK2
ENSG00000061987	grey	0.0581373	0.0287992	-0.0167114	0.0869871	0.114674	-0.0364651	0.0202556	0.0946013	-0.106628	-0.0770423	0.0451939	-0.00531923	0.0763004	-0.00343755	-0.0435244	0.00358899	-0.0154078	-0.0621172	0.112825	0.0676066	MON2
ENSG00000062194	CD8T7	-0.0592503	-0.0510062	0.114957	0.122632	-0.0127099	0.00305315	0.042673	0.221352	-0.080632	-0.0528677	-0.0115529	-0.0651383	-0.0492039	0.00285496	-0.0993527	0.193929	0.0404348	-0.0574478	0.121439	-0.0208232	GPBP1
ENSG00000062485	grey	0.0060663	-0.00886791	0.033969	-0.032034	0.0242469	-0.0721206	-0.0659509	0.0205049	-0.0419499	-0.161279	0.0492716	-0.110346	0.0636982	-0.0991159	-0.047213	0.0490795	-0.0216092	-0.00563459	-0.0658363	-0.029526	CS
ENSG00000135842	CD8T4	0.00366855	0.0263404	-0.0366501	0.330309	0.138979	-0.181035	-0.155526	0.0576428	-0.0306618	-0.0976948	-0.305429	-0.0455342	-0.166991	0.0257866	-0.286054	-0.0784207	-0.104101	0.0220601	0.237244	-0.00421008	NIBAN1
ENSG00000062650	CD8T5	0.0913401	-0.00501066	0.0430459	-0.0587159	0.116738	0.0389406	-0.0544495	0.029089	-0.133493	-0.0804001	0.0764001	-0.0454102	-0.00286064	-0.122988	-0.089022	0.0199543	0.0671177	-0.00550869	0.0753316	-0.0716205	WAPL
ENSG00000062716	grey	0.154483	0.0357709	-0.0417267	-0.0939679	0.0306484	0.0743064	0.123746	0.045743	0.0116936	0.0519439	0.134204	0.0396235	0.0886609	0.0663077	0.0975286	0.0657472	0.0635157	0.0578809	0.0226699	-0.0727442	VMP1
ENSG00000062725	CD8T10	0.0606797	0.00900724	0.0763544	-0.0900559	0.048055	-0.00531029	0.136078	0.153672	0.120856	-0.038728	0.173869	-0.0840524	0.142121	-0.0734037	0.09651	0.132357	0.0800084	0.222434	-0.0105185	-0.0736367	APPBP2
ENSG00000063046	grey	0.122088	0.227543	0.0288672	0.00344991	-0.0266644	0.00112533	-0.00567648	-0.00644686	-0.0336138	-0.0196606	-0.00294248	0.06468	0.130132	-0.0243337	-0.0685545	-0.0246015	0.0097397	0.0865151	0.0136364	0.0233295	EIF4B
ENSG00000063127	CD8T7	-0.0259994	-0.0654768	0.0187997	0.0332488	0.128303	0.00451545	-0.00535679	0.0236788	-0.0374417	0.00512737	0.0199831	-0.0428138	-0.0236192	-0.0955678	-0.0716754	0.01937	-0.0247259	-0.0505661	0.136088	-0.0243263	SLC6A16
ENSG00000063176	grey	0.0402293	0.136854	0.0287395	-0.0204057	-0.0514622	0.046116	0.0313139	-0.0362838	0.0969572	0.0331937	0.0396964	0.0403136	0.0748172	0.0385849	0.0211411	0.00901157	0.0403669	0.115778	0.00951672	0.0236438	SPHK2
ENSG00000156508	CD8T2	0.433651	0.581019	0.0444602	0.0510412	0.161274	0.124488	0.0122287	-0.024275	-0.0117023	-0.0339316	0.0797693	0.153893	0.252957	0.0935419	0.0088967	-0.0528669	0.129796	0.119009	0.0620028	-0.102159	EEF1A1
ENSG00000063180	grey	0.000882805	-0.0800735	-0.00185785	0.0185429	0.0316817	0.129002	0.157787	-0.03872	-0.0906467	0.0355087	0.0414343	-0.0522583	0.111432	-0.0374356	0.0106077	-0.038907	0.0386085	-0.130083	-0.00942428	-0.0258567	CA11
ENSG00000063244	grey	-0.0153795	0.0484382	0.103455	0.00235932	-0.014923	0.0654603	0.00894267	-0.0550835	-0.0881262	0.00907474	0.0060227	0.0571423	0.0115141	-0.0904619	-0.00207787	0.0282363	-0.0189479	-0.0113308	-0.00135686	0.0163785	U2AF2
ENSG00000063245	grey	0.0155144	0.0324656	-0.067784	-0.0203891	0.0918653	-0.0158692	-0.0122498	-0.000919679	-0.0178766	-0.0604832	0.0261515	-0.131326	-0.00809165	-0.125366	-0.0502869	0.0499182	-0.148703	0.0702735	0.115624	-0.0135859	EPN1
ENSG00000063322	grey	0.0323652	-0.0332873	0.0301493	-0.00352551	-0.0425465	0.0678082	0.0721381	0.00933518	0.0130776	-0.0126375	0.0809375	0.00488309	-0.0269157	-0.0564711	-0.0312151	0.0548974	0.117155	0.0195208	0.0665195	-0.0170584	MED29
ENSG00000063601	grey	0.0491216	0.020468	0.0127586	0.0194956	0.014055	-0.00716566	0.138316	-0.0018453	-0.0268032	0.0468337	0.0686576	-0.000234575	0.125413	0.0228478	0.0574927	-0.0760719	0.00370235	0.0516853	-0.00413822	0.0225864	MTMR1
ENSG00000063660	grey	0.10535	0.107216	-0.123539	0.0071951	0.0255581	-0.0261006	0.0551765	-0.118352	0.102935	0.111345	-0.0480871	0.0889272	-0.0068266	0.0852812	0.050852	-0.136399	-0.0312718	0.133111	-0.0188909	0.112105	GPC1
ENSG00000063761	grey	0.0853556	0.0743284	-0.00720556	0.00239759	-0.0104561	-0.0145244	-0.0455379	0.0143904	-0.139805	-0.0741609	-0.0203135	0.00659735	0.0449232	-0.0721515	-0.0927205	-0.0398653	-0.11524	0.0861913	0.120259	-0.0695431	ADCK1
ENSG00000063854	CD8T15	-0.00320284	0.0556175	0.0660154	-0.0309773	-0.0200093	-0.0242134	-0.023333	0.0352214	0.0447676	-0.0192865	0.0288058	-0.00291467	-0.0161827	-0.0205201	-0.0447885	0.0945145	-0.0166953	0.0266344	0.0228756	-0.105562	HAGH
ENSG00000063978	grey	-0.0897407	-0.0862911	0.00586877	0.128772	-0.0326163	-0.132727	0.0677211	0.145802	0.132524	0.0145731	0.0365954	-0.0566446	-0.0358135	0.0633002	-0.0164503	0.102251	0.0899299	0.122096	-0.031319	0.00645747	RNF4
ENSG00000064012	grey	0.0185245	0.0682874	0.0815144	0.168701	-0.0957098	-0.0510014	0.0490447	0.0110326	0.0603244	0.0564501	-0.0874319	0.0821348	0.12977	0.121085	-0.0458451	0.0834784	0.0670672	0.0929378	0.0290431	0.083673	CASP8
ENSG00000064042	grey	0.0181649	0.0351343	0.0602443	0.00952296	-0.0120367	0.065813	0.244291	0.0224505	0.0617065	0.283982	0.0360056	0.112837	0.0441582	0.0924107	0.130085	-0.0159928	0.131218	0.133869	0.0247059	0.101057	LIMCH1
ENSG00000064102	grey	-0.00357458	0.0290311	0.156636	0.106562	-0.0574554	0.0064348	0.103124	0.017709	0.0127778	0.00929886	0.0407269	0.104387	0.066243	0.0906908	-0.066187	0.106031	0.06582	0.0288925	-0.0538883	0.0453588	INTS13
ENSG00000064115	grey	-0.0809013	-0.0606148	0.0585691	0.0592323	-0.059916	0.0625546	-0.00503541	-0.0169867	-0.021497	0.0900762	-0.0163291	0.0340343	-0.0956572	0.0435973	0.0944747	0.00512917	-0.0439872	-0.0771119	-0.112041	0.111631	TM7SF3
ENSG00000064201	CD8T12	-0.097537	-0.143116	0.124312	0.0442385	0.033167	-0.00703525	0.0121572	0.0330803	0.122951	0.0309115	0.000205209	-0.0458884	0.0569315	-0.0130513	-0.0474115	-0.0119681	-0.0615584	-0.0145444	-0.0223785	0.0222202	TSPAN32
ENSG00000064313	grey	-0.097058	-0.0787004	0.0683224	0.163356	-0.0313799	-0.0900781	0.100591	0.120823	0.069074	0.0281361	-0.0782453	-0.00536745	-0.0413098	0.122174	-0.0681996	0.0366126	-0.00567632	0.0925805	0.107636	0.0939965	TAF2
ENSG00000064393	CD8T10	-0.0749244	-0.143992	0.122386	-0.0583612	-0.024751	0.115592	0.0957329	0.133378	0.11445	0.0911732	0.174196	0.0665095	0.00830042	-0.0341971	0.116921	0.187262	0.136876	-0.0167091	0.0242519	0.0565647	HIPK2
ENSG00000064419	grey	-0.0335705	-0.0425376	-0.0416135	-0.0638041	-0.0281021	0.014899	-0.0737123	-0.0655218	0.0606367	-0.0561731	-0.055125	-0.0182354	-0.063884	0.056344	-0.00778363	-0.0740074	0.080885	0.0391934	-0.0800526	0.0150866	TNPO3
ENSG00000064547	grey	0.0630514	0.232198	0.0244424	-0.0107672	-0.0361463	0.0740927	0.0483077	-0.0363897	0.0612459	0.019649	0.0169582	0.0395764	0.118701	0.010007	0.0752757	0.0258061	0.0390096	0.086305	-0.0831924	-0.0104554	LPAR2
ENSG00000064601	CD8T9	0.038236	0.174446	0.0304908	0.106174	-0.0873401	-0.0950075	0.123771	-0.076181	0.00474607	0.137509	-0.141553	0.0943345	0.0188014	0.0864088	-0.0111926	-0.100874	-0.0783855	0.141956	-0.0494955	0.0778025	CTSA
ENSG00000064607	grey	0.0458532	-0.0849512	-0.0892346	0.00921647	0.0640251	0.0536471	0.140946	0.085853	0.0137528	-0.0414797	0.0492329	0.0473092	0.00903782	-0.0224002	0.0648352	0.0539973	0.0727324	0.140842	0.0454866	0.0290281	SUGP2
ENSG00000064651	grey	-0.0113408	-0.0793313	-0.0728416	0.00404755	0.113717	0.00595659	0.086338	0.066779	0.00796377	-0.0344892	0.0531604	-0.027665	-0.0155746	-0.0336045	0.0788838	-0.00319117	0.0470186	0.0913819	0.0554144	-0.052628	SLC12A2
ENSG00000064652	CD8T6	0.142583	-0.0265993	-0.0499698	-0.137066	0.150827	0.199482	0.060629	-0.0693926	-0.0713054	-0.0815228	0.175821	-0.029855	0.107267	-0.0579479	-0.0346564	-0.0173808	0.105574	-0.0147158	0.0459368	-0.0792927	SNX24
ENSG00000171863	CD8T2	0.400198	0.574144	0.049566	-0.0426389	0.0643267	0.20112	-0.10483	-0.156152	-0.0712403	-0.0190088	-0.0619573	0.136334	0.193673	-0.034226	-0.0726304	-0.145909	-0.0940589	0.014009	0.0493101	-0.0690855	RPS7
ENSG00000064687	CD8T11	-0.0142618	0.158343	0.270413	0.122752	-0.00339039	0.109675	0.124228	0.0225558	-0.0311399	0.191493	0.00118101	0.248368	-0.00343036	-0.00102861	0.0369037	0.0838891	0.00316252	-0.0784359	0.0628127	0.167031	ABCA7
ENSG00000064703	CD8T10	0.105282	0.108428	0.123115	-0.0720477	0.0442087	0.067341	-0.020833	0.0223958	0.122699	-0.0346982	0.128216	0.03281	0.0576146	0.0623347	-0.0408292	-0.0138945	0.123899	0.137855	0.0188713	-0.0751278	DDX20
ENSG00000064726	grey	-0.0119136	0.0348791	0.00173439	0.0789193	-0.0410825	-0.000241472	0.121196	0.134756	-0.0209676	-0.0322068	-0.0367488	0.0459765	-0.0412706	0.0899287	0.0591974	0.0818756	0.0649679	-0.00547634	0.0630715	0.0918816	BTBD1
ENSG00000064763	CD8T10	-0.0172698	-0.0463531	-0.0317891	-0.071383	0.0337047	-0.0082973	0.0864661	0.0203669	0.00869729	-0.0945596	0.106598	-0.0560887	0.0300587	-0.0795253	-0.0272771	0.126172	0.0795023	-0.0436235	0.152985	0.00312355	FAR2
ENSG00000064932	CD8T19	-0.0367787	0.0239716	0.0924451	0.0869537	-0.0749014	0.00974437	-0.0797097	0.0126689	0.0267472	-0.0477068	-0.0492399	0.106495	-0.145912	-0.0257018	0.0408103	0.0805584	-0.100705	-0.0718891	0.061375	0.183017	SBNO2
ENSG00000064933	grey	0.00959999	-0.0290635	0.112176	0.00240476	-0.0164851	0.0463919	-0.0324203	0.0751374	0.134828	0.0138178	0.0790742	0.0701947	0.0371183	0.0972153	0.172905	0.103567	0.0928584	-0.0149222	0.0327771	0.100036	PMS1
ENSG00000064995	CD8T6	0.110294	0.0903337	-0.0563511	-0.0741507	0.0897121	0.0885386	-0.0413276	-0.115725	-0.116097	-0.0117982	0.0175929	-0.0222529	0.0741956	-0.0495292	-0.0802683	-0.0797195	-0.060227	0.0264794	0.0609555	-0.119812	TAF11
ENSG00000064999	grey	-0.136151	-0.18718	0.0830022	-0.0475358	-0.118424	0.0275981	0.0539117	-0.048084	-0.0131257	0.12099	0.0549559	-0.043768	-0.0260796	0.0279642	-0.0302053	0.0896778	0.0918957	-0.109977	-0.142935	-0.0168989	ANKS1A
ENSG00000065000	grey	-0.0752025	0.0152653	0.022361	0.0264692	-0.166223	-0.0162481	0.0362042	0.120283	0.13278	0.0254262	-0.0720573	0.060753	-0.0480255	0.000299847	0.0172298	0.0817915	0.0985465	-0.0602353	0.0276843	0.132773	AP3D1
ENSG00000065029	grey	-0.0627704	-0.0297271	0.0215666	0.0848286	-0.113797	-0.0987077	0.0550956	-0.0276411	0.00929475	0.0168776	-0.115167	0.0486575	-0.125151	0.0384229	0.0308916	-0.000980991	0.0325214	-0.0195582	-0.133554	0.00783691	ZNF76
ENSG00000065060	grey	0.048511	-0.00506624	-0.0129541	-0.0138613	0.002908	0.102312	0.159784	0.0108912	-0.00491591	0.1094	0.0946975	-0.000446337	0.0843024	0.0996196	0.111813	0.0352375	0.0990738	0.0509126	-0.0664673	-0.0226514	BLTP3A
ENSG00000065135	grey	0.0241925	0.0421741	0.0745991	0.0542014	0.0167083	-0.081715	0.0400688	0.0657574	0.148424	0.0385449	0.0287502	0.00531684	0.0566331	0.152767	0.0500151	-0.020528	0.0328338	0.132653	0.0349404	0.106575	GNAI3
ENSG00000065150	grey	0.0715417	-0.132259	0.00746495	-0.0174706	0.0222548	0.0981159	0.0402109	0.0937059	0.00618719	0.0309908	0.121209	-0.00125623	-0.0176844	-0.0278878	0.00379723	0.0709173	0.136299	0.0581359	-0.00728259	0.0167971	IPO5
ENSG00000065154	CD8T1	0.105854	0.0412298	-0.087618	-0.122516	0.127905	0.0711042	-0.0257271	-0.00809102	0.0695697	0.00570701	0.122631	0.0488855	0.0749232	-0.0252352	0.155844	0.00211561	0.0314786	0.170012	-0.0370181	-0.0201087	OAT
ENSG00000065183	grey	0.0230926	0.0532211	0.0486658	0.137563	0.0177635	-0.00471136	-0.0333217	-0.0236494	-0.0118581	-0.0643535	-0.114626	0.0521973	-0.0991953	0.000621897	-0.160714	0.0728202	-0.0338602	-0.038531	0.127796	0.00689382	WDR3
ENSG00000065243	grey	-0.0713135	-0.0607791	-0.0213257	-0.0363847	-0.0692115	-0.0742444	-0.0501625	0.010438	-0.0486573	0.0388846	-0.00648796	-0.0575502	0.0240411	0.0570602	0.135023	-0.0213837	0.0702558	-0.0362251	-0.189892	0.00224893	PKN2
ENSG00000065308	grey	-0.0436698	-0.0345509	0.0814724	-0.0104746	-0.0957202	-0.0101962	0.0131287	0.112545	-0.0466352	0.0239605	0.124854	0.0345319	-0.0336719	0.00740496	-0.098977	0.163595	0.135789	0.0327014	-0.0790733	0.0848104	TRAM2
ENSG00000065357	CD8T10	-0.0273947	-0.0435473	0.0679832	-0.0437912	0.0205709	0.0314724	0.056612	0.000906969	0.130222	0.0441123	0.116552	-0.0114008	0.0590914	0.0177235	0.115819	0.0484602	0.0802346	0.0570892	-0.0183595	0.140259	DGKA
ENSG00000065413	CD8T10	-0.00426844	-0.150952	0.0110476	-0.0539887	0.164576	0.0247777	-0.0813169	0.074649	-0.0158815	-0.16118	0.154679	-0.162311	0.0569708	-0.130915	-0.0254146	0.109612	-0.0298258	-0.0334651	0.0803746	0.0147323	ANKRD44
ENSG00000065427	grey	0.0389124	0.0736559	0.032971	-0.0594329	0.0385836	0.0374074	0.0756542	0.0336414	0.0240595	-0.00570758	0.0714301	0.138984	0.0103015	0.0372469	-0.0433262	0.0325884	0.0643478	0.00852345	0.0271776	0.0211577	KARS1
ENSG00000065457	grey	0.0562288	-0.0637105	-0.0499833	-0.0932914	0.12572	0.125835	0.152458	-0.0677734	0.0863631	0.0638154	0.153641	-0.0428485	0.126527	-0.0885514	0.0286472	0.0616942	0.0158544	0.0203029	0.0367015	-0.0243853	ADAT1
ENSG00000065485	CD8T13	0.00370611	0.0590941	0.0758268	0.101855	-0.088979	0.0277775	-0.0385876	-0.00458977	0.0186187	0.0624998	-0.166141	0.203001	-0.128978	0.141498	-0.0667274	-0.0956121	0.0334523	0.011109	0.0659032	0.0414931	PDIA5
ENSG00000065491	grey	0.0322261	0.0157116	-0.0343359	-0.0478539	0.0879166	0.010908	-0.033025	0.00446997	-0.176358	-0.137007	-0.0379389	0.0114325	-0.00247232	-0.085386	-0.0411385	0.0645694	0.0660792	-0.14315	0.0303098	-0.116137	TBC1D22B
ENSG00000065518	CD8T1	0.0394078	-0.00132561	0.0252975	-0.0839572	-0.0395921	0.0219127	-0.00739304	0.0135803	-0.0448221	-0.024679	-0.0164659	0.0139811	0.0564288	0.044198	-0.128548	-0.042094	-0.0568464	0.138383	0.00991955	-0.0948436	NDUFB4
ENSG00000065526	grey	-0.0392846	-0.0577771	0.0531941	-0.0327756	-0.039024	-0.108865	-0.00506073	0.144127	0.137544	0.0735063	0.0458161	-0.0426885	0.00375607	0.0645101	0.105151	0.0717933	-0.00120392	0.0853838	-0.0576618	-0.0408798	SPEN
ENSG00000065548	grey	-0.0549522	0.0425046	0.132655	0.0219044	-0.0201799	0.0926125	-0.0504305	-0.0319562	0.0464641	0.0733388	-0.0804507	0.0485249	0.0228953	0.0763869	0.0519626	0.027691	-0.0565208	-0.0539503	-0.0569579	-0.0367101	ZC3H15
ENSG00000065559	CD8T9	-0.048254	-0.069088	-0.0212999	-0.0739092	-0.0846473	0.0479309	-0.0100883	-0.00343099	0.0615783	0.00159498	0.0162646	-0.0679666	0.0177353	-0.0884164	0.0357802	0.0859631	-0.0430826	-0.0127094	-0.0732602	-0.0108483	MAP2K4
ENSG00000065600	grey	0.055164	-0.0143567	0.110292	-0.0209866	0.0160864	0.0083815	-0.060744	0.0770492	-0.00582632	-0.0759114	0.0141787	0.0389909	-0.0146917	0.0877675	0.0719026	0.0880252	0.085104	-0.0389522	-0.00614119	0.0317173	PACC1
ENSG00000065609	grey	-0.0247096	-0.0492564	-0.0595352	-0.0146952	0.00691141	0.0584416	0.0800107	-0.015625	-0.0731831	0.0467367	0.0534648	-0.0354024	0.0423506	-0.0813717	0.0369354	-0.0223902	-0.0756268	0.0346641	0.106419	-0.0338774	SNAP91
ENSG00000065613	grey	-0.0452671	0.0141191	0.115807	-0.0411624	-0.136275	0.0722136	-0.016359	-0.122888	-0.0139964	0.0667035	0.0440378	0.0869664	-0.0105503	0.0250374	0.0574686	0.0188072	0.036682	0.00417435	-0.0654188	0.0329481	SLK
ENSG00000065615	CD8T10	-0.0481612	-0.0271834	0.00173695	-0.0709943	-0.054516	-0.00798439	0.0962367	0.0430014	0.0677638	0.0255704	0.126229	-0.00465362	0.103545	-0.00403518	0.0974496	0.0540835	0.0684165	0.108642	0.00799404	-0.000689779	CYB5R4
ENSG00000065665	grey	-0.0260891	0.0466053	-0.033063	0.0601625	0.140252	-0.0477284	-0.0483857	0.0145042	-0.00777033	-0.0523005	-0.0274353	-0.0102064	0.0354852	-0.0266957	0.00962673	-0.0296643	0.00874154	0.0517004	-0.00633113	-0.0116579	SEC61A2
ENSG00000065675	grey	0.00561547	-0.0097226	-0.0690587	0.113934	0.0643417	-0.0560573	-0.0249091	-0.0173003	-0.147019	-0.0640031	-0.0704522	-0.0617964	-0.0382336	-0.0841279	-0.159255	0.0198659	-0.00817833	-0.0836394	0.14531	0.0289188	PRKCQ
ENSG00000065802	grey	-0.00855703	-0.01937	0.0196234	0.00872133	0.0803642	0.0424681	0.140283	0.0276013	-0.0128462	0.0545488	0.0855217	0.135595	0.042373	0.0440175	0.146377	0.0351644	0.103281	-0.00461377	-0.0593374	0.0635391	ASB1
ENSG00000065809	grey	0.069066	0.0906864	-0.0176246	0.0684145	0.0803006	0.0191529	-0.0631041	0.015761	-0.0483838	-0.0201224	-0.0294961	0.00269798	0.105572	0.0638516	-0.0332054	-0.0812313	-0.00811452	0.0542992	-0.0336761	-0.0864619	FAM107B
ENSG00000065833	grey	-0.0581146	0.142179	0.0608942	0.146727	-0.0744507	-0.0462463	0.0382825	0.0357795	-0.122189	0.0703213	-0.160617	0.0941766	-0.10506	-0.0359081	-0.0994332	0.00377967	-0.0294554	-0.0858631	0.142349	0.04303	ME1
ENSG00000065882	grey	-0.0425486	0.00173784	0.0849035	0.154998	-0.0523513	-0.0293958	0.0763323	0.0482029	0.0179312	0.0844505	-0.0791919	0.0822013	0.00937439	0.0735259	-0.112398	-0.024518	-0.00872408	-0.0806831	0.0388164	0.100902	TBC1D1
ENSG00000065883	grey	-0.0194791	-0.0528787	0.041805	0.162085	0.058177	0.0608973	0.0766418	0.146455	0.106591	0.00187114	0.03222	0.0647997	0.0217922	0.0937486	0.10254	0.143142	0.101459	0.0217909	0.0531007	0.102929	CDK13
ENSG00000152495	CD8T4	-0.19682	-0.104661	0.100494	0.325359	-0.0772476	-0.150454	-0.153638	0.19241	-0.00714491	-0.125709	-0.263079	-0.0857542	-0.278697	-0.018354	-0.238673	0.141786	-0.143203	-0.0939796	0.169378	0.113386	CAMK4
ENSG00000065923	CD8T6	0.0619186	0.0958371	-0.0738064	-0.0241812	0.003419	0.0416646	-0.00233671	-0.0370549	-0.0460938	-0.0186178	0.0613701	-0.0103785	0.0356425	-0.00951723	0.0317359	-0.0818165	0.0427135	0.0413422	-0.0695477	-0.0786228	SLC9A7
ENSG00000065970	CD8T6	-0.0070836	-0.00212939	0.0779674	0.0219471	0.0552224	0.0989173	0.0358196	-0.00812317	-0.0509228	0.0250041	0.0133498	0.0206228	0.034048	0.0310171	0.0170294	2.00833e-05	0.0604913	-0.0738058	-0.0368675	-0.0527189	FOXJ2
ENSG00000065978	grey	0.00795753	0.0564426	0.0109737	0.0357017	0.0725666	-0.0251724	0.0999927	0.122633	0.019111	0.0048986	0.119779	0.010884	-0.0439464	0.0661764	0.0223326	0.0550638	0.0591707	0.0076442	0.0846167	0.0561909	YBX1
ENSG00000131507	CD8T4	-0.0884934	0.018879	0.111503	0.322102	0.0092162	-0.12487	0.04997	0.16001	-0.0437134	0.086497	-0.223283	0.030879	-0.150099	0.0276692	-0.186146	0.020171	-0.12215	-0.0116558	0.160568	0.0967539	NDFIP1
ENSG00000066027	grey	0.0899395	-0.0330596	-0.0561462	-0.0308751	0.235885	-0.0172625	0.00917453	0.0814841	-0.0642664	-0.123122	0.0856016	-0.0500648	-0.0392512	0.0372104	0.0137978	0.110956	0.0875414	0.0827666	0.094622	-0.0530656	PPP2R5A
ENSG00000066032	grey	-0.101394	0.0157342	0.0705886	0.0272108	-0.0498913	0.00492763	0.0663322	-0.0171382	0.0272454	0.179567	-0.0451099	0.134469	-0.0520214	-0.00821467	0.0430525	0.027447	-0.0894331	0.157195	0.0734576	0.211869	CTNNA2
ENSG00000066044	grey	0.0830216	0.0991443	-0.000859206	0.000115245	0.0668882	0.0545356	0.0145074	-0.0513676	-0.0193894	-0.0752747	0.0411496	-0.0842623	0.122499	-0.0546827	-0.0890994	0.00866514	-0.00507036	0.114192	-0.01275	0.0658078	ELAVL1
ENSG00000066084	CD8T15	-0.0836786	-0.0557542	0.189599	-0.0148362	0.0224092	0.0499935	0.154733	0.167498	0.16346	0.0688531	0.129392	0.0749621	0.0639117	-0.030948	0.130987	0.277717	0.0777277	0.0334836	0.0613448	0.158713	DIP2B
ENSG00000066117	CD8T10	0.088582	0.0293106	-0.0137132	-0.0619661	0.0788329	0.0802177	0.0630792	-0.0461262	-0.0236286	0.00539569	0.146009	0.0306954	0.135457	-0.0650795	-0.0543434	0.0446502	0.0421524	-0.0327672	0.0375238	0.00343999	SMARCD1
ENSG00000066135	grey	-0.0309645	-0.101858	-0.0112567	-0.0385022	0.0205967	0.126877	0.0852018	0.0089913	0.037353	0.0490365	0.0870094	0.056355	0.0915289	-0.0456008	0.0882827	0.0597616	0.0164826	-0.0280565	0.0142322	0.0646118	KDM4A
ENSG00000066136	CD8T14	-0.000451196	0.00611603	0.0764549	-0.0108525	-0.0854112	-0.0633805	-0.0185486	0.0225539	0.165249	0.0209278	0.0491562	0.122611	0.0138084	0.113544	0.304888	0.00515011	0.108328	0.0478931	-0.053815	-0.0278406	NFYC
ENSG00000066294	CD8T10	0.155116	0.0932798	-0.0944952	-0.243598	0.0920111	0.192508	0.0555481	-0.0994333	0.000476767	0.0709318	0.301336	0.0283367	0.168409	-0.0562023	0.17195	0.0296082	0.094484	0.0312475	-0.165841	-0.055387	CD84
ENSG00000066322	grey	0.0591341	0.0568821	0.0410963	0.0098003	-0.0538448	0.0699278	-0.0473019	-0.0926923	-0.0500706	0.12272	-0.0853007	0.146012	-0.00635795	0.113864	-0.00142164	-0.12468	0.00533446	-0.0527174	-0.117045	0.0297408	ELOVL1
ENSG00000066382	CD8T19	-0.0676447	-0.0527858	-0.0440496	0.00962318	0.0748742	-0.0648536	0.0843561	0.0228895	0.0268859	0.111687	-0.0144939	-0.0309789	0.0370852	-0.0511423	-0.0123087	0.0321174	-0.132142	0.0244894	0.000608411	0.170517	MPPED2
ENSG00000066422	grey	0.0224726	0.0902958	-0.0331933	-0.137348	0.0183173	0.0617331	-0.0190549	-0.0482494	-0.066098	0.0790786	0.088421	0.0739087	0.0322282	-0.00844744	0.0530638	0.082393	0.0470965	0.0197837	-0.0317939	-0.0290648	ZBTB11
ENSG00000066427	grey	-0.0523574	0.0131064	-0.0130331	0.073541	0.0446235	-0.0177438	-0.00697878	0.0382216	0.0365574	0.0419558	-0.0285281	0.00749208	-0.0637168	0.046311	-0.083633	0.0323627	0.0722967	-0.0670644	0.019286	0.0943668	ATXN3
ENSG00000066455	grey	0.0475948	0.0313102	0.0251258	0.0504094	-0.0196452	0.0257088	0.0512935	0.066714	-0.0215903	-0.050481	-0.0503029	0.0231287	-0.00576151	0.0209804	-0.0280038	0.0165689	0.0573679	-0.0165919	-0.0438529	-0.000760449	GOLGA5
ENSG00000066557	grey	-0.0540776	-0.064145	-0.0058214	-0.0353767	-0.0144434	-0.0942748	0.124516	0.106755	0.0457541	-0.0337751	0.0411958	-0.0719167	-0.0437306	-0.0769639	-0.0200938	0.177465	-0.00943232	0.0470621	0.0910535	0.110039	LRRC40
ENSG00000066583	CD8T8	-0.00548811	0.101252	0.0294742	7.41175e-05	-0.140584	-0.0352919	-0.0284007	0.0209401	0.0564762	-0.0259773	-0.0180226	0.087392	-0.0689496	0.110209	0.0539897	-0.00980479	0.10482	0.0215596	-0.130892	0.0219605	ISOC1
ENSG00000066629	grey	0.00596685	0.00173184	0.0391308	-0.0687952	0.0258344	0.0436787	0.232679	-0.00908175	-0.0542112	0.10502	0.123514	0.00772068	0.0909593	0.0819489	0.050685	0.100944	0.123501	0.05771	-0.0967725	-0.0395636	EML1
ENSG00000066651	CD8T16	0.0408832	0.00450148	0.0558147	-0.0248689	-0.11225	0.110521	0.0629585	-0.0912663	0.0834005	0.0981128	0.09041	0.15638	0.0983239	0.182819	0.161674	-0.0144419	0.246227	0.0522486	-0.0739889	0.0553792	TRMT11
ENSG00000066654	grey	0.0187628	0.0765311	0.148422	0.0700728	-0.146828	-0.011311	-0.0455203	0.0154203	0.0701274	0.0177475	-0.0464725	0.00935813	-0.084157	0.10521	-0.0684938	-0.0246709	-0.000869488	0.000236149	-0.0591821	0.0691479	THUMPD1
ENSG00000066697	grey	0.100233	0.156492	-0.0804565	-0.0696911	0.0192777	0.0833669	-0.0291456	-0.135759	0.0496517	-0.0660713	-0.00686831	0.0330018	0.0443776	-0.0750827	-0.0759003	-0.139556	-0.0014636	0.0640568	0.160017	0.0550804	MSANTD3
ENSG00000066739	CD8T11	0.0136236	-0.0280058	0.0805288	0.0801867	0.142428	0.0571829	-0.0149715	0.0283729	-0.0235604	0.0342596	0.00479536	0.140202	-0.0821281	0.141025	0.100787	0.0448557	0.0244169	-0.036128	0.12694	-0.0570184	ATG2B
ENSG00000066777	CD8T10	0.0910184	0.0172493	0.0409072	-0.0571398	0.0505492	0.130017	0.0100385	-0.002476	0.0168024	0.0156825	0.158937	0.149967	0.0654455	0.0537519	0.213323	0.0384998	0.188884	-0.083777	-0.0591076	-0.102671	ARFGEF1
ENSG00000066827	CD8T6	-0.147541	-0.198099	-0.0637217	0.0122245	-0.0551302	0.000984763	-0.0682271	-0.0408857	-0.0240757	0.0446247	-0.0774966	0.0295023	-0.0764345	-0.0487807	0.0190151	0.0090248	-0.082411	0.00954477	0.00890515	-0.0377971	ZFAT
ENSG00000066855	CD8T10	0.0965826	0.0635034	-0.17851	-0.178975	0.014304	0.0172786	-0.0664767	-0.0940708	0.0155269	-0.0532501	0.0660755	-0.0438108	0.125038	-0.0196482	0.0167301	-0.100179	-0.00335718	0.0398576	-0.0492163	-0.0815854	MTFR1
ENSG00000066926	CD8T7	-0.0122382	-0.0613111	0.101511	0.0810225	-0.0501618	0.0184526	0.0215423	0.139237	0.0643007	0.00788619	-0.028838	0.118872	-0.0646707	0.0365318	0.114914	0.142457	-0.0143203	-0.0269856	-0.026226	0.101218	FECH
ENSG00000171444	CD8T4	-0.192058	-0.0494154	0.0276649	0.319079	-0.122098	-0.229446	0.029995	0.129841	-0.0567158	0.000643321	-0.28886	0.00895055	-0.172251	0.0188585	-0.150034	0.0104266	-0.204632	-0.061134	0.193542	0.125434	MCC
ENSG00000067048	grey	-0.0268127	-0.014693	-0.135474	0.0301931	0.0157141	-0.0503596	-0.0703358	-0.0455783	-0.053598	-0.0764129	-0.0787507	-0.157455	0.0717464	-0.121395	-0.0762714	-0.0329679	-0.0784988	-0.0590358	-0.077754	-0.0110929	DDX3Y
ENSG00000067057	grey	0.0683742	0.0291367	-0.0122591	0.0108206	0.0372598	0.0527152	0.159685	0.034231	0.0234296	0.0425084	0.0436219	0.100084	0.0120532	0.0208108	0.0695339	0.074853	0.0499071	-0.0239971	-0.00282307	0.0417262	PFKP
ENSG00000067064	grey	0.0826219	0.0133448	0.0304624	-0.000357277	0.00301779	0.0478564	-0.00486638	-0.00566921	-0.0455603	0.0354637	-0.0017216	-0.0516261	0.123908	0.000423554	-0.0227307	-0.00791709	0.106872	0.00844749	-0.0388524	-0.0694139	IDI1
ENSG00000067066	grey	0.00213992	0.0837885	0.0230335	0.166286	-0.022767	0.0278374	-0.0579093	-0.124337	0.0462379	-0.0333518	-0.188897	0.123056	-0.0461814	0.0280305	-0.0875791	-0.136615	-0.0803194	-0.0326038	0.0286926	0.0946428	SP100
ENSG00000067082	grey	0.0344355	0.0651384	-0.0613078	0.0804549	-0.00421498	-0.160984	0.0507729	0.0483737	0.0255516	-0.00384791	-0.0349868	-0.0968303	0.0336249	-0.00298846	-0.0990732	-0.0710398	-0.137204	0.0639405	0.000202226	0.0234507	KLF6
ENSG00000067113	grey	-0.083441	-0.0797568	-0.0288003	0.0598163	0.0569967	-0.0988612	-0.0451498	0.0763564	-0.0150469	-0.144093	-0.062406	-0.0879345	-0.00380465	0.0412065	-0.0882456	-0.0067789	-0.0856134	0.0330027	0.0130093	0.0332031	PLPP1
ENSG00000067141	grey	-0.0988316	-0.113795	0.0340169	0.098568	-0.115143	-0.122155	0.0512869	0.137599	0.0429202	0.107857	-0.0593014	0.0037274	-0.11045	0.0115748	0.00144901	0.0353782	-0.0667097	0.0754744	0.0179078	0.0594864	NEO1
ENSG00000149806	CD8T2	0.325247	0.571717	-0.0657509	0.00497211	0.0819482	0.116796	-0.00406829	-0.118018	-0.0848549	-0.00688292	-0.0755224	0.249013	0.15198	0.0717215	-0.000359822	-0.115547	0.0446284	0.110091	0.111642	-0.0558055	FAU
ENSG00000067182	grey	0.062362	0.0513738	0.0416489	0.0959896	0.00636816	0.00864803	-0.0173553	-0.0782165	-0.0990967	0.0363416	-0.0920202	0.0448448	0.0740089	0.0512605	-0.0239963	-0.0791731	0.053816	0.00914529	-0.0398966	-0.060865	TNFRSF1A
ENSG00000067191	grey	-0.0929324	-0.00969906	0.105815	0.0666385	-0.0718923	0.0764101	0.0385159	-0.000902848	0.0427704	-0.0243615	-0.0295573	-0.00473234	0.00772144	-0.066755	-4.73465e-05	0.0840073	-0.079031	-0.0943187	-0.0215436	0.0747728	CACNB1
ENSG00000067208	grey	0.0824471	0.0879218	0.0474677	0.051986	0.0913443	0.0514151	-0.0346721	0.0287317	0.105457	0.0437547	0.012485	-0.0138045	0.0325333	0.135752	0.0309749	0.0161428	0.0824038	0.0821165	0.0638919	0.0166392	EVI5
ENSG00000067225	grey	0.037049	0.0906686	0.0518407	0.0487058	-0.0416394	0.0461482	0.100517	0.0592071	-0.00186597	0.0622183	-0.00145871	0.06175	0.0264642	-0.00160131	-0.0474395	0.0499765	0.0776308	-0.0300719	0.0537003	0.107547	PKM
ENSG00000067248	CD8T12	0.00633524	-0.0544103	-0.000573028	-0.0551393	0.0396025	0.0347621	-0.00759308	-0.13011	-0.0718283	0.112277	0.0606722	-0.0268621	0.188541	-0.0461744	0.0184979	-0.0359066	-0.0310936	0.002304	-0.0186006	-0.0797635	DHX29
ENSG00000067334	grey	0.182974	0.0568557	-0.111485	-0.112469	0.0484843	0.0342564	0.00820149	0.0133722	-0.170534	-0.0213324	0.0968568	-0.0333504	0.185995	-0.0043316	0.0263057	-0.00164378	0.120917	-0.0197262	-0.0721772	-0.179118	DNTTIP2
ENSG00000067365	grey	0.0278026	0.0521388	-0.0409474	-0.0767165	-0.0949046	0.00601352	-0.0246475	-0.00152556	-0.0243697	0.00750085	-0.021765	0.0314867	0.0189954	0.0188346	0.0820209	-0.00921152	0.0686001	-0.000596632	-0.111515	-0.138925	METTL22
ENSG00000067369	CD8T7	0.0632038	0.0130218	0.0371564	0.0475572	-0.0324794	-0.0231693	0.00421777	0.272737	0.0125792	0.032483	-0.0500744	-0.0248975	-0.0121511	-0.0072494	0.0737226	0.145898	-0.023658	0.0881267	0.128833	0.0834087	TP53BP1
ENSG00000067533	grey	0.0136024	0.024115	-0.0462915	-0.00717308	0.0230028	0.00829506	0.0645121	-0.02783	-0.00409752	-0.00884125	0.00171964	0.00240176	0.0138032	0.0242364	0.0389876	0.0360614	0.0191923	0.0188962	-0.0316156	0.0794752	RRP15
ENSG00000067560	CD8T6	0.0163321	0.0517893	0.105839	-0.0238439	0.0105783	0.0517058	0.0175942	-0.102621	0.0128603	-0.0233029	0.0638619	0.0195318	0.0618005	-0.0651025	-0.0102975	0.00251983	0.0188381	-0.0485387	0.0461843	0.0612675	RHOA
ENSG00000067596	grey	0.0824853	0.102998	0.0455188	-0.0503197	-0.0418298	0.0169702	-0.0254667	0.0111322	-0.00734128	0.00885894	0.0184416	0.0192302	0.0218525	-0.0130018	0.0399516	-0.0402223	-0.07652	-0.0884378	-0.0643148	-0.112329	DHX8
ENSG00000067606	CD8T16	0.108427	-0.01852	-0.0299768	-0.0636915	-0.038602	0.0509167	-0.0209156	0.0452381	0.151599	-0.0687298	0.0916688	0.0462738	0.0383455	0.0741749	0.0382166	0.0629496	0.198313	0.0735075	-0.0445036	-0.0137397	PRKCZ
ENSG00000067646	grey	0.0486027	0.0303329	0.00597028	0.0242371	-0.098944	-0.0651513	0.00671009	0.000621457	0.115819	0.0018438	-0.0241526	0.0861586	0.0231591	0.0967845	0.0154647	-0.0216095	-0.0657915	0.131161	-0.06428	-0.0165208	ZFY
ENSG00000067704	grey	0.0241675	0.0428933	0.116015	0.0180742	-0.0627995	-0.00692076	-0.0138784	0.040005	0.160714	0.0264758	-0.0365241	-0.00952542	0.0149017	0.0745254	0.00374784	-0.0188802	0.0041312	0.00576118	-0.101974	0.045798	IARS2
ENSG00000067715	grey	-0.131062	-0.0970314	0.182575	0.0432995	-0.111177	-0.0123859	0.215298	0.0736358	0.225174	0.281656	-0.0309441	0.0382842	-0.0440814	0.0579025	0.0562877	0.106026	-0.119469	0.149049	0.0984654	0.246723	SYT1
ENSG00000067798	CD8T10	-0.119729	-0.107562	0.0911095	-0.0541751	0.0247609	0.0403913	0.283311	0.145736	0.109253	0.178185	0.0819714	0.0776462	-0.0696201	0.0510181	0.155117	0.179519	-0.00719109	0.0717399	0.0691197	0.0446125	NAV3
ENSG00000213949	CD8T4	-0.201514	-0.0497598	0.201227	0.318309	-0.0548393	0.0294722	-0.058034	0.00105018	0.010372	0.0804948	-0.305835	0.10747	-0.121403	0.129443	-0.0602159	0.000816685	-0.186045	-0.0909333	0.0481093	0.121042	ITGA1
ENSG00000067900	grey	0.0208892	-0.144502	0.0575766	-0.0535141	-0.0235733	-0.0178376	0.0825896	0.14843	0.0249623	-0.0403181	0.0945156	-0.0525103	0.0324006	-0.00318503	0.00326163	0.221882	0.143756	0.0188779	-0.000649041	0.0311359	ROCK1
ENSG00000067955	grey	-0.0538921	0.0700989	0.114635	0.132291	-0.159981	0.0802123	0.175266	0.0730693	0.167246	0.185496	-0.0416401	0.227788	0.0604286	0.152679	0.162442	0.0559213	0.0805625	-0.0964276	-0.0605767	0.238082	CBFB
ENSG00000067992	grey	-0.0214956	-0.0477899	0.0824956	0.0744902	-0.00894424	0.0559613	0.0562227	-0.01945	-0.0415865	-0.0234614	0.00341307	0.0912658	-0.0350895	-0.0300966	0.0647632	0.176069	0.0937504	0.00266248	0.0636089	-0.00326064	PDK3
ENSG00000068024	CD8T18	-0.183719	-0.168132	-0.010056	0.132826	0.0921082	-0.176116	0.0780067	0.0993058	0.0107613	-0.0624494	-0.0589943	-0.0418727	-0.052729	-0.069954	-0.118345	0.0202974	-0.0797044	0.0255551	0.20811	0.0830921	HDAC4
ENSG00000112782	CD8T4	-0.0258953	0.103809	0.190791	0.317809	-0.12604	-0.0556762	-0.0859103	0.0738326	0.0111528	0.0325857	-0.300661	0.150228	-0.130449	0.173299	-0.0563567	-0.0868562	-0.0974205	0.0125579	0.0147824	0.0362871	CLIC5
ENSG00000068097	CD8T1	0.12553	0.0873726	-0.0164904	-0.0348925	-0.0373048	0.179723	-0.0285645	-0.121294	-0.0918313	-0.00993753	-0.00567371	0.111631	0.0228544	0.0196881	-0.0144564	-0.0071808	0.13715	-0.0873451	-0.0313363	-0.0267621	HEATR6
ENSG00000068120	grey	-0.0369331	0.0889098	0.00745263	0.0173913	-0.10546	0.0257997	-0.0681081	-0.0757266	-4.15727e-05	0.0157278	-0.12531	0.0925211	-0.0758489	-0.0371716	-0.00461709	-0.113666	-0.162336	-0.0799589	-0.0252736	0.0395304	COASY
ENSG00000068305	grey	0.0849066	-0.0327246	0.0599787	-0.0367443	0.0157553	0.103565	0.116152	0.0506701	0.0934641	0.040149	0.155271	-0.0634594	0.0831312	0.0625675	0.156588	0.0869617	0.150331	0.148707	-0.0211022	-0.0245783	MEF2A
ENSG00000068308	grey	-0.00606772	-0.0146872	0.0239489	-0.0345268	0.111507	0.0229058	-0.0271672	0.0251613	0.0212844	-0.0326572	0.0684088	-0.0150678	-0.00179726	-0.041596	0.136492	0.0697167	-0.0324483	-0.0154197	0.124288	0.0289612	OTUD5
ENSG00000068354	CD8T9	0.0609646	0.0850573	0.166056	0.0837668	-0.0758782	0.029637	0.00396189	0.035477	0.0793284	0.0136476	-0.019488	0.038957	0.0647311	0.106066	0.048589	-0.0256363	0.00445839	0.00921222	-0.078823	0.0458867	TBC1D25
ENSG00000068366	grey	-0.078192	-0.0591319	0.134161	0.0566548	-0.0859808	0.0238961	0.0178947	0.0672051	-0.00538227	0.0663382	-0.0527703	0.038589	-0.0983231	-0.0804333	0.0304438	0.0939744	-0.0740794	-0.0226775	0.0169675	0.0799442	ACSL4
ENSG00000068383	grey	-0.0830892	-0.162614	0.0196649	0.0534853	0.00170395	-0.193518	0.1333	0.122292	0.0932364	-0.0292557	-0.00478634	-0.0862654	0.0155272	0.0309743	-0.00553418	0.0299906	0.0352838	0.0734195	-0.0992218	0.00734554	INPP5A
ENSG00000068400	grey	-0.0318578	-0.0166347	0.0293471	-0.0178804	-0.00747611	0.0317034	0.0158097	0.0226135	0.0562927	-0.0551343	0.00205269	0.00438825	0.0350303	-0.0602995	0.0406001	0.0528663	-0.054326	0.0111954	0.0756868	0.0845413	GRIPAP1
ENSG00000164674	CD8T4	-0.0875925	-0.0169783	0.0108446	0.316983	0.184718	-0.236221	-0.121594	0.104238	-0.0540799	-0.0807936	-0.286369	-0.0312333	-0.235911	-0.0891408	-0.309232	-0.0364536	-0.221654	-0.00523882	0.194699	0.0384699	SYTL3
ENSG00000068615	CD8T13	0.0164376	0.126898	0.167421	0.119576	-0.0620679	-0.0408935	0.00861462	-0.00268069	0.0856692	0.208173	-0.0391721	0.200041	0.02952	0.257654	0.102303	-0.0662874	0.0345875	0.0882318	0.0395288	0.0786629	REEP1
ENSG00000068650	grey	-0.110519	-0.0560408	0.193255	0.0391023	-0.176344	0.0441223	0.102018	-0.00276407	0.153678	0.0976083	-0.0372918	0.0490664	-0.0789889	-0.0106906	0.070287	0.101839	-0.0324318	-0.0426213	-0.0539335	0.108976	ATP11A
ENSG00000068654	grey	-0.0130085	-0.0136134	0.0532106	-0.0390307	-0.0737341	-0.0244773	0.0639507	0.0819781	0.0842207	0.0756604	0.130833	-0.0187508	0.0445059	-0.00765382	0.0332452	0.142083	0.0656644	0.0456789	-0.0296883	-0.0256857	POLR1A
ENSG00000068697	grey	0.0716574	0.0258292	-0.00991232	-0.0501381	0.00410698	0.021056	0.144369	0.00652725	0.051374	0.173537	0.156576	0.0409779	0.0876888	0.0869422	-0.0476721	-0.0390501	0.091119	0.135406	-0.0290662	-0.00255603	LAPTM4A
ENSG00000068724	grey	-0.0425676	-0.0660825	0.0021193	0.00968524	-0.038412	0.0608316	0.0970868	0.03744	-0.0555143	0.0581068	0.060065	0.117259	-0.0233068	-0.0693321	0.0771894	0.209689	0.0277659	-0.0859054	-0.00718358	0.0816953	TTC7A
ENSG00000068745	grey	-0.0539228	-0.0316774	0.011784	0.0305511	0.119743	0.0559678	0.0757956	-0.0115339	0.0474626	-0.043782	-0.0261095	-0.0315717	-0.0564538	-0.0261294	0.0236341	0.0640223	0.00484652	0.0482056	0.11979	0.0772357	IP6K2
ENSG00000068784	grey	0.0262552	-0.0799257	0.102658	-0.000760077	0.0238252	0.0260594	0.00446011	0.0612494	0.0388114	-0.0567704	0.0835994	0.0212666	0.0393431	0.0713441	0.0109032	0.119088	0.122031	0.00967857	-0.0245619	0.00480956	SRBD1
ENSG00000068796	grey	-0.0303239	-0.00265826	0.0815025	-0.0361974	0.0392413	0.0132115	-0.0248074	0.00488847	0.0177518	0.0045644	0.110977	-0.104791	0.114354	-0.0153928	0.0235371	0.0483574	0.0723945	0.0195056	-0.133831	-0.0532685	KIF2A
ENSG00000153283	CD8T4	-0.195305	-0.0502578	0.217502	0.315156	-0.0775457	-0.0964036	-0.0391292	0.211915	0.0957746	0.0446361	-0.222973	0.0456532	-0.145751	0.0286919	-5.79711e-05	0.133741	-0.0106359	-0.134318	0.0713953	0.242061	CD96
ENSG00000068878	grey	0.00831564	-0.00819781	-0.00695423	0.0573913	0.0661475	-0.0982505	-0.0270938	0.0213983	0.0208385	-0.0417239	-0.00613641	-0.0394291	-0.00646257	0.0195862	0.0286586	-0.00986271	-0.00793423	0.0682608	-0.0158798	0.016591	PSME4
ENSG00000068885	grey	0.102612	0.0108416	0.0457296	-0.00673387	0.0898402	0.11627	0.0383289	0.0581773	-0.0132527	0.00231411	0.0857442	0.0867797	0.0755634	0.0564579	0.0250825	0.0769583	0.0542673	0.00788139	0.0390783	-0.0672511	IFT80
ENSG00000068903	grey	0.10245	0.0863619	0.0286384	0.0948982	0.0987427	0.0781667	0.0939496	0.0991931	0.100467	0.0591293	0.0467767	0.0229783	0.03923	0.0372939	0.0617733	0.0918503	0.10541	0.0458088	0.088964	0.0822522	SIRT2
ENSG00000068912	grey	0.0189429	0.0193071	-0.08022	-0.0975204	0.0528237	-0.077416	-0.0157921	-0.00525061	0.0648754	-0.0112215	0.0254777	-0.135527	0.0580913	-0.0734676	0.0211634	-0.116835	-0.109882	0.129208	-0.0635745	-0.11999	ERLEC1
ENSG00000166710	CD8T2	0.419395	0.568056	-0.141938	-0.103809	0.121146	0.110055	-0.0494667	-0.214128	-0.122402	0.0580979	0.0264829	0.147711	0.297653	-0.0152406	0.000672184	-0.236472	0.0030633	0.0866712	0.0114012	-0.141065	B2M
ENSG00000069020	grey	-0.054832	0.0148076	0.0805442	0.192013	0.0125923	-0.173647	0.101889	0.123488	0.0330081	0.124831	-0.118736	0.00973498	0.0401477	0.0704564	0.00533792	-0.00642938	-0.0877554	0.100132	0.109057	0.070539	MAST4
ENSG00000069188	CD8T3	-0.116873	-0.126183	0.215814	0.0841137	-0.0877795	-0.0482607	-0.00493932	0.0734377	0.177086	0.0915719	-0.0165679	0.00425795	-0.134594	0.138062	0.00177703	0.0591354	0.0143809	0.0267062	-0.0766974	0.142264	SDK2
ENSG00000069248	grey	0.014079	0.0210502	0.033175	0.000558433	0.132857	-0.049947	0.000565558	0.0220675	0.0721617	0.0609515	0.011092	0.0188141	0.0715845	0.123192	0.0468958	0.00161274	-0.00383873	0.087809	0.0687008	0.0379331	NUP133
ENSG00000069275	CD8T9	-0.0193724	-0.00292341	0.0440403	0.0773176	-0.050307	0.0194935	0.0478452	0.0270121	0.0530869	0.104738	-0.00621366	-0.00717972	-0.0446236	0.0922038	0.0707567	0.0657969	0.0219717	-0.0255988	-0.0752918	0.109654	NUCKS1
ENSG00000069329	grey	0.0627177	0.0372457	0.0647133	-0.066006	-0.0222548	0.0934147	-0.0121228	-0.137425	-0.0388769	0.0477993	0.0626461	0.0752463	0.0751718	0.0848829	0.0127538	-0.0184335	0.0125259	0.0197651	-0.0354701	-0.0909871	VPS35
ENSG00000069345	grey	0.126065	-0.00669839	-0.107511	0.0274968	0.0867733	0.0865481	-0.0961234	-0.0136765	-0.152716	-0.163562	0.0543744	-0.0236029	-0.00495487	-0.0887086	-0.0267382	0.0457465	0.0880172	-0.102989	0.147325	-0.0797381	DNAJA2
ENSG00000069424	CD8T6	0.00771095	0.00671321	-0.00575589	-0.0591372	-0.161962	0.178431	0.0777983	-0.0703435	-0.03758	0.0639353	0.0233942	0.0533547	-0.0295548	-0.0097493	-0.023091	0.0529357	0.0860475	-0.0989979	-0.0303843	0.096131	KCNAB2
ENSG00000083845	CD8T2	0.306945	0.559736	0.0198722	0.140732	-0.00532003	0.00596282	-0.102024	-0.107786	-0.0491363	0.0242185	-0.204511	0.206536	0.0373758	0.0989502	-0.109669	-0.21884	-0.0171692	0.100899	0.0429787	-0.0616805	RPS5
ENSG00000132849	CD8T4	-0.137536	0.00378495	0.130714	0.308952	-0.1487	-0.145884	-0.080887	0.156103	0.106817	0.0653198	-0.310925	0.0408301	-0.247093	0.106346	-0.202351	-0.0396035	-0.130821	0.107053	0.0836153	0.0862832	PATJ
ENSG00000069702	CD8T5	0.0292708	-0.030068	-0.0600595	-0.0630135	0.262465	0.0844699	-0.100367	-0.105713	-0.149404	-0.180874	0.0543256	-0.0539837	0.0868227	-0.16227	-0.0590784	-0.0444558	-0.0433922	0.0103699	0.188416	-0.0646691	TGFBR3
ENSG00000069849	CD8T10	0.0461455	0.0195202	0.0270895	0.0134613	0.124737	-0.0110674	-0.0254056	-0.0635792	-0.037183	-0.00531058	0.0544519	-0.0483254	0.128937	-0.0747593	-0.0432051	-0.0339402	-0.0574307	0.0476237	0.00884579	-0.0673115	ATP1B3
ENSG00000069869	CD8T6	-0.0227367	-0.0367293	0.0281227	-0.0571869	-0.0376035	0.0437137	-0.0826899	-0.0922188	-0.0215342	-0.0640829	-0.0135772	-0.0414576	0.00312703	0.017931	-0.0104233	-0.00990535	-0.0319085	-0.0904037	-0.0895721	-0.111803	NEDD4
ENSG00000103257	CD8T4	-0.149222	0.0115422	-0.0134233	0.3078	0.14568	-0.073206	-0.114908	0.118837	0.0222147	-0.00372362	-0.220923	-0.0229597	-0.151708	0.0457377	-0.164974	0.013436	-0.166451	-0.0488141	0.162454	0.101358	SLC7A5
ENSG00000069956	grey	-0.0808389	-0.0188906	0.0158845	0.021811	0.0585635	0.0883256	-0.0401146	-0.00265229	0.101738	-0.00635804	-0.0107517	-0.0161306	0.133761	-0.0257561	-0.0353131	-0.0727652	0.0532368	0.00268634	0.0757095	-0.0132947	MAPK6
ENSG00000271503	CD8T2	0.455557	0.557999	-0.139186	-0.226566	0.174267	0.309145	-0.146657	-0.322718	-0.251463	-0.0389986	0.099749	0.109073	0.271608	-0.060643	-0.0351802	-0.206983	0.0682999	-0.0115989	-0.0363965	-0.344643	CCL5
ENSG00000069974	grey	0.0744463	0.0606278	-0.0891301	-0.104559	0.00145632	0.0245027	-0.100234	-0.0373898	-0.0289219	-0.0665124	0.0991135	0.0308331	0.0794602	-0.0355364	0.111036	0.0172447	0.0141654	0.10306	0.023425	-0.0618394	RAB27A
ENSG00000115604	CD8T4	-0.0884648	-0.00899244	0.020951	0.306113	-0.0264477	-0.135579	-0.0403777	0.0949628	0.0368459	-0.0165563	-0.209136	-0.0165089	-0.103023	0.0190372	-0.218516	-0.0481897	-0.0821296	-0.00984016	0.142111	0.0902976	IL18R1
ENSG00000070010	grey	-0.00350079	-0.0426252	0.00419832	0.0576849	0.0399229	-0.0297922	0.0893638	0.0725052	0.00171201	-0.00269409	0.0160575	0.00656902	0.0524937	0.0640205	-0.0282901	0.0738673	0.0826565	0.021532	0.0359629	0.00803457	UFD1
ENSG00000070047	grey	0.0399922	-0.0921347	0.0044599	0.0170384	0.00913112	-0.0315822	0.0982114	0.0312709	-0.00453933	-0.055387	0.0365542	-0.0493115	-0.00138159	0.0204028	-0.0822523	-0.00404344	0.0809189	0.130633	0.012526	-0.0268247	PHRF1
ENSG00000070061	CD8T10	0.0675573	-0.00281715	-0.110829	-0.0821982	0.115752	0.036061	0.0379319	0.010945	-0.0247192	-0.0351529	0.168306	-0.098632	0.115235	-0.0278842	-0.0243304	-0.00572519	0.149505	0.0268684	-0.0781591	0.0588072	ELP1
ENSG00000070081	grey	0.0285202	0.00137507	0.0017221	-0.065661	0.0408071	0.0149145	0.0180197	0.0309176	-0.0126028	0.0212383	0.0560148	-0.0523404	0.0199743	-0.0448767	0.0397884	0.0253461	-0.0846716	0.115396	0.0534406	0.101688	NUCB2
ENSG00000070087	grey	-0.00564545	-0.109147	-0.056315	0.0583108	0.133341	-0.0314377	-0.0199047	-0.0226819	-0.0415464	-0.0404184	-0.00281038	-0.132224	0.0711398	-0.0567338	-0.055605	-0.0522715	-0.103172	0.0225194	0.0418115	0.0404595	PFN2
ENSG00000139112	CD8T4	-0.106939	0.0547881	0.178173	0.303871	-0.034234	-0.0460653	-0.0269846	0.0353612	0.101254	0.0223733	-0.281404	0.112568	-0.131133	0.10776	-0.110188	0.0319922	-0.0347366	-0.00348856	0.111567	0.130316	GABARAPL1
ENSG00000070214	grey	0.000800399	-0.0446855	-0.017897	-0.0602026	0.00685357	0.00174127	0.163039	0.116958	0.0268062	-0.0144079	0.108278	-0.0873418	0.0683324	-0.0525978	-0.041958	0.0931409	-0.0499463	0.0391342	0.112768	0.0505306	SLC44A1
ENSG00000070269	CD8T16	-0.0176456	-0.0296753	0.0467939	-0.0443807	-0.0648829	0.0139775	-0.0337153	0.026558	0.0234958	0.033472	0.0536738	0.021144	-0.0644159	0.14949	0.0505917	0.0381622	0.185227	0.0250484	-0.0594931	0.0431712	TMEM260
ENSG00000070366	grey	0.0688011	0.0179079	0.0293669	-0.0342136	-0.0140256	0.143801	0.09159	0.0365489	-0.0170928	0.152296	0.139208	0.0662545	0.0155579	-0.0242158	0.036856	0.131403	0.097542	0.0560991	0.0460935	0.0261183	SMG6
ENSG00000070367	grey	0.0191064	0.0785135	0.168497	0.0620941	-0.0617308	0.00820998	0.122904	0.0586374	0.0968202	0.122551	0.0355473	0.110565	0.0925121	0.0762318	0.00325062	0.0186384	-0.0556666	0.102628	-0.023488	0.0362044	EXOC5
ENSG00000070413	grey	-0.135925	-0.110412	0.145205	0.116212	-0.118332	-0.0806671	0.0267624	0.0981827	-0.0249054	0.0491162	-0.0521285	0.0842494	-0.11939	0.0432378	0.0381809	0.105779	0.00152481	-0.0472361	-0.0166361	0.104749	DGCR2
ENSG00000070423	CD8T10	0.038941	0.0056694	-0.116375	-0.182491	0.0144238	0.0276167	-0.0125502	-0.0622353	0.00770557	-0.0470769	0.0106788	-0.0394333	0.0800958	-0.0650162	0.114877	-0.0151988	-0.062828	0.0420797	-0.0701673	-0.136649	RNF126
ENSG00000070444	grey	0.078119	-0.00419301	0.0825061	0.0634735	0.0959035	0.098407	0.0488338	0.0884391	-0.0371094	0.0855429	0.0725019	0.0117533	0.0269608	0.0134845	-0.0510618	0.0604175	0.0480063	-0.0522654	0.0697171	0.00151633	MNT
ENSG00000070476	grey	-0.0108868	-0.0328948	0.0611883	0.0769297	-0.076483	0.0105752	0.128568	-0.0327416	-0.0261581	0.00117729	0.0124082	0.0607881	0.0205512	-0.0219386	-0.0771729	-0.0478047	0.0886725	0.0167472	0.0362646	0.0450151	ZXDC
ENSG00000070495	CD8T16	0.169375	0.0390594	0.0514455	-0.0210245	0.056375	0.0665852	0.0816719	0.0488533	0.00645767	-0.0288058	0.0961099	0.0367268	0.0373911	0.0841905	0.0583489	0.121267	0.216508	0.128443	0.0650895	-0.0474237	JMJD6
ENSG00000070501	grey	-0.0462172	-0.0331189	-0.0395823	0.059295	0.0759512	-0.0243253	-0.00105242	0.0955646	0.0917181	0.0416213	-0.0385148	0.0189498	0.0428355	0.0482445	-0.00503807	-0.0936115	0.0043906	0.11451	-0.0357967	0.00548523	POLB
ENSG00000198712	CD8T2	0.318853	0.556536	0.068491	0.00810574	0.0365412	0.0724524	-0.0311602	-0.145406	0.0526627	0.076693	-0.00176994	0.288477	0.131826	0.149993	0.0855774	-0.102303	0.0394478	0.17641	0.0823442	-0.0560116	COX2
ENSG00000070610	grey	-0.0825968	0.0063505	0.0245653	0.115696	-0.0516134	-0.118463	0.0895596	0.000165689	0.126756	0.0123288	-0.0931014	0.000791953	-0.0962367	-0.00840721	-0.0915026	-0.0984971	0.00248468	0.0433951	-0.0479944	0.0867866	GBA2
ENSG00000070718	CD8T16	0.128741	0.135791	-0.0487612	-0.0644961	-0.0511709	0.0228597	-0.0675453	-0.122001	0.00213006	-0.0703119	0.0263711	-0.0696983	0.0761148	-0.0191213	-0.00296514	-0.0800981	0.0507216	-0.00926513	-0.0568629	-0.118023	AP3M2
ENSG00000142541	CD8T2	0.394738	0.553257	-0.0104885	-0.0197142	0.105473	0.0800957	-0.0665243	-0.106355	-0.0730859	-0.033208	0.00234255	0.123042	0.223711	0.0277285	-0.0273172	-0.176181	0.0834748	0.112388	0.0728001	-0.169405	RPL13A
ENSG00000070759	CD8T15	-0.0313823	-0.0541642	0.121087	-0.00779707	0.10671	0.0254595	-0.0204452	0.142578	-0.0163767	-0.115977	0.122562	-0.0047721	0.0301232	-0.00416381	0.0133038	0.219916	0.0298838	-0.0403889	0.0349753	0.00183108	TESK2
ENSG00000070770	grey	0.0158514	0.0212786	0.123266	-0.00903786	-0.0907861	0.0406629	-0.0309276	-0.00234008	0.0455673	-0.0614094	-0.0312239	0.0986492	-0.06325	0.108524	-0.00783589	0.0722004	0.131619	-0.0135987	-0.0830116	-0.00159443	CSNK2A2
ENSG00000070785	grey	0.0654681	-0.0331383	-0.0235937	0.00895622	-0.0916113	-0.0373039	0.0960903	-0.00717713	0.111943	0.0768446	-0.0228326	0.0507835	0.0247938	0.0766977	0.0709147	-0.0464453	0.0128348	0.078628	-0.0431846	0.0387832	EIF2B3
ENSG00000070808	grey	-0.0358146	0.0156367	0.0595225	0.0169272	-0.0982458	0.0217615	0.14787	0.0145133	0.203287	0.120925	0.00982616	0.0456635	-0.0129339	0.0109268	0.0224619	-0.00874104	-0.0300294	0.133084	0.0663124	0.270211	CAMK2A
ENSG00000070814	grey	0.101006	0.104408	0.0521665	0.0572806	0.00316919	0.0701117	-0.000374584	0.0552924	0.053369	-0.0301523	0.0545041	0.106205	0.0234802	0.0954723	-0.0605399	0.00349581	0.0755843	0.0789376	-0.0290024	-0.0104129	TCOF1
ENSG00000070831	grey	0.134338	0.0926645	0.0241224	-0.0341695	0.0356791	0.0334837	0.00845713	0.0518995	-0.024038	0.0162446	0.0927039	-0.0726213	0.154433	0.0304834	0.0705887	0.0509377	0.131346	0.0994607	-0.0451218	-0.110441	CDC42
ENSG00000070882	grey	-0.136594	-0.0931307	0.134638	0.140605	0.0111202	0.040266	0.0915313	0.201026	0.102262	0.0691049	0.103343	0.0424983	0.0272118	0.0463667	0.114557	0.255497	0.071767	-0.0334114	0.0777106	0.139695	OSBPL3
ENSG00000070950	grey	0.0239488	-0.00339057	0.121074	0.0267978	-0.0968909	0.0149377	0.00964515	0.0600145	-0.00348628	0.0288303	0.0381084	0.0563838	0.0278166	0.00174454	0.0384268	0.0688255	0.0308125	0.0235663	0.154424	0.0983372	RAD18
ENSG00000070961	grey	0.0593119	0.0775701	-0.00146575	0.00646237	-0.0376171	0.0344915	-0.0347347	0.0233929	0.0455532	0.0244149	-0.0407977	0.0268547	0.0549116	-0.0133778	-0.0201052	-0.0573193	-0.0582344	0.108333	0.0264153	-0.0775323	ATP2B1
ENSG00000071051	grey	0.0467329	-0.185511	-0.0994035	-0.0919281	0.123369	0.0335658	0.00704919	-0.00105869	0.00656205	-0.0066738	0.119721	-0.100169	0.0768332	-0.0352206	0.0553041	-0.0517892	-0.0279104	0.0147504	-0.0660212	0.026797	NCK2
ENSG00000071054	grey	0.0110573	-0.0991489	-0.083108	-0.0829862	0.0657814	-0.0338161	-0.02698	0.0562086	0.0106947	-0.173398	0.0717076	-0.103586	-0.00400057	-0.0833679	0.0700967	0.0775364	-0.0146888	0.0548531	0.0698719	-0.0612229	MAP4K4
ENSG00000141232	CD8T4	0.0688719	0.21843	0.0375669	0.302848	0.0177491	-0.062669	-0.105367	0.0348375	-0.0470892	-0.00126168	-0.235124	0.13026	-0.0633621	0.135034	-0.153476	-0.076527	-0.040226	-0.00794525	0.102716	0.00862062	TOB1
ENSG00000071082	grey	0.0822281	0.119868	0.0548427	-0.0750139	-0.00735756	0.0413063	-0.0462988	-0.0329046	-0.0302121	-0.114873	0.0178755	0.0221997	-0.0614983	0.0359059	-0.0490029	0.0567733	0.056147	-0.126177	0.0496424	-0.034438	RPL31
ENSG00000071127	CD8T12	0.091067	0.110925	0.086562	-0.0608133	0.0153118	0.127487	0.136702	0.00948721	0.0561578	0.0297693	0.13008	0.0223593	0.231496	0.0522483	0.136639	0.0881769	0.0600783	0.0596694	-0.0351683	0.0413112	WDR1
ENSG00000071189	grey	0.0325323	-0.0301718	0.0799061	0.0400559	-0.026079	-0.0357361	0.054032	0.138993	0.17661	0.0798957	0.0656174	-0.0609369	0.12234	0.203196	0.0835226	-0.0043686	0.109313	0.0355559	-0.106463	-0.0250829	SNX13
ENSG00000071205	grey	-0.00842941	0.0672634	0.0867685	-0.0222192	0.0134354	0.066977	0.0322611	0.0680587	-0.0320556	0.0161058	0.063357	0.0773375	0.0747707	-0.0183783	-0.0170799	0.130887	0.056823	-0.0617702	0.0358837	0.052767	ARHGAP10
ENSG00000071242	grey	-0.0903478	-0.112406	0.0936593	0.0488313	0.0283161	0.014241	0.243338	0.0489997	0.0627897	0.0573992	-0.0200294	-0.0550984	0.0219561	0.0540963	0.0595004	0.105599	-0.039542	0.0447961	0.0139355	0.145286	RPS6KA2
ENSG00000071243	CD8T13	0.0337328	0.0516378	0.0430835	0.0224049	0.0164911	-0.0960138	0.0122847	0.0789899	0.0385421	0.0183001	0.00993416	0.0702282	-0.0627077	0.16365	0.0147633	0.0425073	0.13032	0.0218808	-0.0838506	0.0518863	ING3
ENSG00000071246	grey	-0.067201	-0.0706039	0.0731714	0.0325434	-0.0165478	0.00731649	0.12413	0.0727707	-0.023688	-0.0375633	0.0153219	-0.0601048	0.0242771	-0.051048	-0.0169286	0.137822	0.0259256	-0.12445	0.00567141	0.0611477	VASH1
ENSG00000071462	grey	0.0173534	-0.00176213	0.133854	0.144373	0.090136	0.0685851	0.117326	0.0106806	-0.00413689	0.121208	-0.0144269	0.119369	-0.0769629	0.221884	-0.0262988	0.0692076	0.099016	-0.0363994	0.127353	0.136206	BUD23
ENSG00000071537	grey	0.066647	0.0343114	0.0357041	-0.0498897	0.020608	0.062431	-0.0466756	-0.0287405	-0.111857	-0.00714894	0.0530696	0.049617	0.106588	-0.070739	-0.0658913	-0.0380269	0.0356041	-0.0567865	-0.00254741	0.0273767	SEL1L
ENSG00000071553	CD8T13	0.0508083	-0.0154663	0.010436	-0.01046	0.0668728	-0.040674	0.0444638	-0.0843807	0.102436	0.113105	-0.0518158	0.0029599	0.0260859	0.193638	-0.0566451	-0.0760496	-0.0289201	0.0407184	-0.127089	0.0265201	ATP6AP1
ENSG00000071564	CD8T15	-0.0857169	-0.0702461	0.121402	-0.018837	0.017278	0.0224997	0.0911055	0.126184	0.0403142	0.0158808	0.075629	0.00696759	-0.0338699	-0.144384	0.0846735	0.24565	-0.0255831	-0.026192	0.106244	0.0974544	TCF3
ENSG00000105193	CD8T2	0.468352	0.552916	-0.0847764	-0.034774	0.118377	0.0643153	-0.0406422	-0.111467	-0.0153001	0.000546999	0.0706738	0.145618	0.202633	0.128777	0.0269528	-0.224219	0.0871943	0.133491	0.00489268	-0.171058	RPS16
ENSG00000071626	grey	0.0980753	0.0699563	-0.0994705	-0.00982626	0.058912	-0.00109686	-0.0442668	0.0667423	0.00937429	-0.12892	-0.00874833	-0.0421498	0.0151111	0.0669723	-0.0375451	-0.0590657	0.0591931	0.106033	0.0290928	-0.0429975	DAZAP1
ENSG00000071655	grey	-0.0411008	0.101038	-0.0671005	0.0220313	-0.0471739	0.0640072	-0.111491	-0.039811	-0.117412	-0.0467992	-0.0699234	0.0915458	0.0112887	-0.0058827	0.0241939	-0.0239048	-0.0298306	-0.0646861	0.055814	-0.0300563	MBD3
ENSG00000071794	grey	-0.0312805	0.0178681	0.00289787	0.0122445	-0.0319704	-0.0632755	0.00431199	0.0637379	0.0626917	-0.0271471	-0.0115874	-0.00572135	0.0403407	-0.0462846	-0.00630687	0.112862	-0.0208689	0.0228547	0.0898809	0.0231286	HLTF
ENSG00000071859	grey	0.004434	0.0612994	0.0322593	0.0423149	-0.0102537	0.0422333	0.225523	0.0256234	-0.094264	0.0193509	0.00935084	0.0215399	0.0208164	0.0140123	0.0660608	0.123357	0.0111853	0.005207	0.126568	0.0171111	FAM50A
ENSG00000071894	grey	-0.0204055	0.0964834	-0.090033	0.0687612	0.00218702	0.06524	-0.0473136	-0.0170856	0.00119339	0.0405476	-0.0442136	0.0906016	-0.0135946	-0.0129297	-0.0128371	0.0612669	-0.0260738	0.00168107	-0.0196352	0.13234	CPSF1
ENSG00000071994	grey	0.0855453	0.0880984	0.0615358	0.0430571	-0.104424	0.0263317	0.0829032	0.0169672	0.000851628	0.0614575	-0.0336836	0.00014223	-0.0597134	0.0354497	-0.0430973	-0.00182368	-0.06527	-0.0764471	-0.0700499	-0.104785	PDCD2
ENSG00000072042	grey	0.161053	0.144124	0.0168428	0.00301528	0.0616874	0.0977057	0.00211079	-0.108266	-0.120385	-0.0122428	0.00381231	0.0546118	0.0826706	-0.00427525	-0.0863444	-0.101809	0.0896861	-0.0430297	0.0180375	0.0520984	RDH11
ENSG00000072062	grey	0.0437165	0.0695442	0.00397632	0.0344883	0.0495541	0.107308	0.0956749	0.0446269	-0.00257666	0.0983101	0.0689611	0.0246537	0.122085	-0.0446185	0.10467	-0.012957	0.0557355	-0.0300208	0.0596628	0.0295742	PRKACA
ENSG00000072071	CD8T3	-0.065865	0.0330303	0.232141	0.110364	-0.179049	0.0400192	-0.0154929	-0.10707	0.0630894	0.0454395	-0.110063	0.147558	-0.11809	0.148409	0.0129452	-0.0156773	0.00188971	-0.0105605	-0.111756	0.0704245	ADGRL1
ENSG00000198840	CD8T2	0.365318	0.549641	-0.0293794	-0.0387621	0.0614698	0.145101	-0.1146	-0.172035	-0.0492738	-0.0288599	0.0464795	0.276698	0.127511	0.0927487	0.0950025	-0.0921374	0.137568	0.0793747	0.0327427	-0.109089	ND3
ENSG00000072121	grey	0.0927002	0.154348	-0.0184501	-0.000181768	0.0187815	0.127669	0.0584992	-0.0880825	-0.0122294	0.0805414	0.0374999	-0.0375222	0.141406	-0.0160444	-0.0233746	-0.112561	0.0370681	-0.0304992	-0.0584418	-0.00706752	ZFYVE26
ENSG00000072134	grey	-0.0481805	-0.0128699	0.00754408	-0.0659989	-0.0230878	0.0335685	0.19471	0.0325854	0.0260691	0.101127	0.147168	0.000524817	0.0213729	0.0603568	0.0565661	0.0694079	0.0692067	-0.0640758	-0.140535	0.0847083	EPN2
ENSG00000072135	grey	0.125534	0.0353389	0.0506576	-0.0167437	0.0795418	0.151546	0.15011	-0.0471538	-0.112966	-0.0143034	0.0504039	0.100924	0.066974	0.0806145	0.0492834	0.0237518	0.175236	-0.00288873	0.097341	-0.0253923	PTPN18
ENSG00000072201	grey	0.0287081	0.0368727	-0.0731963	0.0482146	0.00539474	-0.0374794	0.0342551	-0.0100813	-0.0322028	0.0808259	-0.059757	-0.0291975	0.0663659	-0.02165	-0.0479227	-0.107801	-0.109131	0.0408112	-0.0742655	0.00885771	LNX1
ENSG00000072210	CD8T6	0.0530139	0.1203	0.0596245	-0.04673	-0.0461387	0.123542	0.170216	-0.00937704	0.122441	0.163004	0.0683826	0.0970642	0.0470795	0.0538027	0.167594	-0.024579	0.0959828	0.0573684	-0.0170234	0.0055385	ALDH3A2
ENSG00000072274	grey	0.0386952	0.0714905	0.0891937	0.0128969	0.0170401	0.0636914	0.0815597	-0.0596602	-0.130671	0.0888481	-0.0258393	0.0340067	-0.00344602	-0.0368933	-0.058797	0.0142749	0.0881651	-0.117602	0.0246667	0.0131037	TFRC
ENSG00000072310	CD8T13	-0.0451552	0.00853053	0.0722116	0.0644403	0.0370194	-0.104696	-0.0813541	0.0182229	0.0614103	-0.0347643	-0.0863141	0.00689939	-0.0644001	0.176019	-0.0454597	-0.0600357	-0.0355274	0.0374725	-0.028613	-0.0840412	SREBF1
ENSG00000072364	grey	0.10736	0.101775	-0.038928	-0.0348338	0.145902	0.137678	-0.0352179	-0.0835295	-0.020227	-0.0487236	0.10611	0.0491044	0.134198	0.0177936	0.0121536	-0.042742	0.0432652	-0.0146536	0.0494786	-0.136143	AFF4
ENSG00000072401	CD8T13	0.10819	0.139571	0.00279628	0.0297077	-0.082611	-0.0768893	-0.0526578	0.0875693	-0.0353793	-0.0740033	-0.0576212	0.0376111	-0.0395294	0.0351201	-0.0458399	-0.00208516	-0.0448153	0.0484195	-0.0278638	-0.0177534	UBE2D1
ENSG00000072415	grey	-0.0344141	-0.00843229	-0.0478143	-0.0438069	0.111851	-0.112849	-0.0782178	0.0120058	-0.00858897	-0.146962	0.0557516	-0.121069	0.026518	-0.0899551	-0.098397	0.00811544	-0.126045	-0.00819896	0.0441094	-0.00516028	PALS1
ENSG00000072501	CD8T13	-0.105156	-0.0614389	-0.0874891	-0.0347787	-0.0349305	-0.08919	-0.0415588	-0.0286246	-0.0433946	-0.0437666	-0.0445969	-0.0680613	-0.0540165	0.0408107	-0.0146428	-0.041264	-0.0220098	0.0287648	-0.011386	-0.0610076	SMC1A
ENSG00000072518	grey	-0.00117475	0.0208165	0.0693543	0.0219795	-0.027093	-0.021579	0.0377177	-0.0330444	0.0192452	0.0672841	0.051414	0.0930184	0.121198	-0.0406903	0.0456962	-0.0164766	-0.0871697	0.0376336	-0.0200751	0.0758419	MARK2
ENSG00000072609	grey	-0.0300772	-0.0364931	-0.000490209	0.055797	0.078806	0.0750679	-0.0389608	0.0597155	0.0810284	0.0548639	0.0121763	-0.0575808	-0.0259458	0.107817	0.0360659	0.0354725	0.0412441	-0.0051749	-0.10932	0.0254239	CHFR
ENSG00000072657	grey	-0.0606479	-0.0809137	-0.0118204	-0.0218847	0.0666322	-0.0721123	0.0420392	0.0401018	0.129391	0.0382703	-0.0288794	-0.0922074	-0.00800519	0.0614707	-0.0226133	-0.0240387	0.0235925	0.136071	0.010509	0.0216653	TRHDE
ENSG00000072736	CD8T10	-0.0181046	-0.141879	0.108369	-0.152414	0.025081	0.0992406	-0.00788883	0.0712065	-0.0116166	-0.102383	0.181399	-0.000334487	0.0735976	-0.117363	0.0254845	0.186264	0.0717623	-0.0688297	-0.0152591	0.0128779	NFATC3
ENSG00000072756	grey	-0.00602645	-0.00155195	0.05062	-0.0194524	0.0310973	0.170979	0.0406991	-0.0295689	-0.00464183	-0.000708672	0.0857714	0.047437	0.153665	-0.0113089	0.0554299	0.0684258	0.0488873	-0.0569654	-0.012186	0.037797	TRNT1
ENSG00000072778	grey	0.0522695	0.0255382	0.00146195	0.0333301	0.0891034	0.0169347	-0.0298799	-0.0867239	-0.0868539	-0.0637752	-0.0263221	-0.00706265	0.0247304	-0.0403914	-0.0264551	-0.0710197	-0.0027389	-0.010173	0.0202039	0.0634796	ACADVL
ENSG00000072786	grey	-0.0144286	-0.0558015	-0.120355	-0.0899507	0.0477547	0.00841328	0.0849143	-0.0103609	0.056238	-0.074254	0.165617	-0.0593044	0.126651	-0.0588157	0.0835035	0.0872186	-0.0104019	0.0531951	0.0265564	-0.0671455	STK10
ENSG00000072803	grey	0.113116	0.0092696	0.0565297	0.0704977	0.0322677	0.0588221	-0.00240932	0.0232275	-0.0206611	0.0476891	0.101046	0.128607	0.0477389	0.0711794	0.0116312	-0.013297	0.142634	0.0411794	0.0435825	-0.0230141	FBXW11
ENSG00000072818	grey	0.0416961	0.100244	0.101175	0.0448043	0.0102489	0.13471	-0.00186496	-0.027023	0.00277948	0.0890704	0.00529361	0.0608729	0.025275	0.0411152	-0.00646888	-0.0305369	0.0590866	-0.0553352	0.0298695	0.083259	ACAP1
ENSG00000072849	grey	0.0328252	-0.00753457	0.0197448	0.0152608	0.0657736	-0.0202239	0.0539023	0.08535	0.0797345	-0.119487	0.095569	-0.0990225	0.0259814	0.00756209	0.035442	0.0869666	0.0642814	0.0115388	-0.0443736	-0.0128721	DERL2
ENSG00000072858	CD8T9	0.0311712	-0.0575419	0.0287111	-0.0381487	-0.0722247	0.05687	-0.0127808	0.102114	0.129936	0.0295002	0.160498	0.00578526	0.107144	0.194353	0.0785185	0.0553448	0.201023	-0.0329035	-0.127084	0.026008	SIDT1
ENSG00000072864	grey	-0.00863339	-0.0222314	0.0824775	0.0496483	0.0430452	-0.000761617	0.00164531	0.0864605	9.75603e-05	0.0158267	-0.0610097	0.0920481	-0.0128027	0.0796791	-0.064263	0.112984	-0.0176619	0.0799371	0.0698168	-0.0385217	NDE1
ENSG00000072958	CD8T10	0.122722	0.107771	0.036665	-0.0362583	-0.0185287	0.040912	0.0249927	0.00265031	-0.0283085	0.0443936	0.0403915	-0.0238634	0.115577	-0.0197757	0.0663001	0.0206737	0.0105526	0.0228702	-0.0766804	0.0249279	AP1M1
ENSG00000073050	grey	-0.0511154	-0.0434064	0.0340039	0.0524555	0.0315692	0.0786987	0.10692	-0.047464	0.118464	-0.00207685	-0.000479881	0.0190887	0.0230171	-0.0643603	-0.036271	0.0795609	0.0471984	0.0337767	0.076539	0.140472	XRCC1
ENSG00000073060	grey	0.0441146	0.0370441	0.0323973	-0.00479581	0.0195359	-0.0120226	0.0309888	0.0722507	0.0658357	0.0447285	0.0621097	-0.0233543	0.0948932	0.128089	0.0278452	-0.0863245	-0.0238881	0.149928	-0.0430692	-0.0261384	SCARB1
ENSG00000073169	grey	-0.0599968	0.0201472	0.12044	0.117717	0.0369377	-0.0224871	0.136407	-0.02309	0.0718406	0.110411	0.0315162	0.0944373	0.0141115	0.135786	0.0525787	0.0403377	0.0229901	-0.0331139	0.0713114	0.0747158	SELENOO
ENSG00000100731	CD8T4	-0.130819	0.0644437	0.141604	0.301598	0.0758518	-0.0570874	-0.0646838	0.00117413	-0.0212942	0.0364559	-0.239203	0.0444716	0.00339258	0.0931815	-0.138647	-0.0145693	-0.135768	-0.134455	0.153793	0.094443	PCNX1
ENSG00000073350	grey	0.0462303	0.113518	-0.0345053	-0.0558749	-0.0130717	-0.0448945	-0.109895	-0.113789	-0.0798568	-0.0245451	0.0086712	0.000754241	0.00978782	-0.0127633	-0.0197082	-0.0870239	-0.0880953	0.0440893	-0.0151236	-0.0602249	LLGL2
ENSG00000073417	CD8T19	-0.189233	-0.140114	0.128318	0.141535	-0.0764076	-0.137226	0.0543238	0.0655848	0.120865	0.0662776	-0.0717422	-0.0638431	-0.0732763	-0.0403027	-0.0550672	0.093239	-0.10576	0.0164245	0.00878884	0.118787	PDE8A
ENSG00000073578	grey	-0.0287008	0.0469151	0.0924388	0.11252	0.0667109	0.00883041	0.0374851	0.0929099	0.0950736	0.0318907	-0.0507792	0.0328068	-0.0791351	-0.00717106	0.00100222	0.142302	-0.0180058	0.0430783	0.109622	0.0523603	SDHA
ENSG00000073584	CD8T6	0.0507436	0.0379991	0.0668186	-0.106991	0.0559195	0.173349	-0.000728559	-0.041713	-0.12233	-0.023771	0.14193	0.11907	0.119196	-0.0135456	-0.00141969	0.110521	0.0965716	-0.101755	0.0397968	-0.0545486	SMARCE1
ENSG00000073605	grey	-0.0699252	0.00880131	0.0995793	0.0964009	0.0945539	0.0207015	-0.011291	0.00203434	-0.0824033	0.0633578	0.000686221	-0.0685586	0.159674	-0.0360721	-0.0723661	0.0687489	-0.118047	-0.00320448	0.000750198	-0.0330367	GSDMB
ENSG00000073614	grey	0.058201	0.0404744	-0.0988195	-0.00655183	0.063495	-0.0122358	-0.153736	0.00614886	-0.105257	-0.0753759	-0.0461813	-0.0967441	0.0380913	-0.0458673	-0.11366	-0.0606959	-0.0922846	-0.0673415	0.0776088	-0.0862048	KDM5A
ENSG00000146285	CD8T4	-0.11131	-0.0526743	0.151356	0.300284	-0.179792	-0.0563854	-0.0404876	0.133832	0.053807	0.027249	-0.215512	0.0458336	-0.205882	0.133306	-0.019239	0.062202	4.74809e-05	-0.0293131	0.0983438	0.151507	SCML4
ENSG00000073711	grey	0.0381342	0.0121274	0.0153091	-0.0542539	-0.0663795	0.0156769	-0.0076731	-0.0428174	-0.0487254	0.12715	0.0955157	-0.0437589	0.0777571	0.036565	-0.00894207	-0.0901666	-0.0493828	0.0711408	-0.0630172	-0.0767694	PPP2R3A
ENSG00000073712	grey	-0.0363136	-0.0347295	-0.0469427	0.00876567	-0.0920208	-0.0502249	0.155055	0.0323157	-0.0196908	0.0273691	-0.0294315	-0.0900889	0.0187093	0.055631	-0.123102	-0.0321238	-0.0407294	-0.0205278	0.027703	0.103997	FERMT2
ENSG00000073803	grey	-0.0323223	-0.0361769	-0.0293492	-0.0731569	-0.0101834	0.00526304	-0.0638871	0.0184249	0.08335	-0.0613055	0.00809121	-0.0404924	0.0255297	-0.0268616	-0.0539897	0.0546779	0.0787914	0.00213224	-0.0112492	0.0303041	MAP3K13
ENSG00000073849	CD8T10	0.0115811	-0.021975	0.103576	-0.0902012	-0.0443799	0.135489	0.162778	-0.00613732	0.0280549	0.0924123	0.178797	-0.0499819	0.0584493	-0.0106772	0.0447136	0.0627161	0.110838	0.0158571	-0.140227	0.0298689	ST6GAL1
ENSG00000073861	grey	-0.0232656	-0.0477208	-0.113668	0.0828233	0.0659695	-0.0590232	-0.0277491	-0.0161849	0.00932791	-0.114258	-0.00160192	-0.110678	0.0944436	-0.0388401	-0.0921949	-0.076036	-0.0803903	-0.0281678	0.0187696	0.00780923	TBX21
ENSG00000073910	grey	-0.0112092	-0.0195306	-0.0265562	0.027585	0.192538	0.0344978	0.100773	-0.0314818	0.0463747	0.119464	-0.0294785	-0.017373	0.101127	-0.0375958	0.0482161	0.0120242	-0.113357	0.108892	0.101165	-0.0499884	FRY
ENSG00000073921	grey	0.0836472	-0.0837352	-0.106059	-0.00181511	0.0564754	-0.0300613	0.0684846	0.0674471	-0.0415063	-0.109323	0.117521	-0.0971337	0.00126394	-0.0657333	-0.0441187	0.0469579	0.0801269	0.0553287	0.130392	0.0389097	PICALM
ENSG00000073969	CD8T18	0.0442356	0.0720628	0.00574983	0.0265261	0.0326753	0.0550124	0.0671633	0.0399292	-0.0724423	-0.033332	0.0331122	0.0997976	0.045751	-0.0898473	0.0778654	0.0980128	0.013259	0.0581996	0.111552	0.0620183	NSF
ENSG00000074054	grey	-0.0797226	-0.116411	0.0765831	0.017589	0.0697442	0.0183755	0.0586921	0.184017	0.084085	-0.0686036	0.0450322	-0.00410096	-0.00299459	-0.0332813	0.131919	0.188771	0.106296	0.00896666	0.0760179	0.031526	CLASP1
ENSG00000074071	CD8T6	0.159615	0.212868	-0.104332	-0.0927974	0.0482788	0.219235	0.0609778	-0.113916	-0.0129409	0.107819	0.0747355	0.144712	0.0896644	0.0147877	0.0701224	-0.0528805	0.0183712	-0.0822534	0.0160175	0.0136849	MRPS34
ENSG00000074201	grey	-0.0109636	-0.0692112	0.0404796	0.066604	0.0293723	0.0534786	0.0524513	0.104362	0.082481	0.109428	-0.0245023	0.01823	0.00175373	0.0608167	0.0482658	0.0636322	0.0137882	-0.0582224	0.064647	0.0526254	CLNS1A
ENSG00000074211	CD8T19	-0.0276472	-0.0169012	0.106859	0.0285328	-0.0418215	0.0439847	0.0872922	0.0563345	0.112039	0.214601	-0.0322274	0.0918862	-0.11327	0.112109	0.0286262	0.0364798	-0.000995721	0.0418585	0.00257579	0.298429	PPP2R2C
ENSG00000074266	grey	0.0963008	0.0807763	-0.102005	-0.0636996	0.0777832	0.05119	0.0157423	-0.0283736	0.012265	-0.0596779	-0.00758318	-0.0232019	0.0296243	0.0182328	0.00867416	-0.0256121	0.111595	0.070583	0.0100026	-0.0929829	EED
ENSG00000074276	CD8T17	0.0119365	0.0359498	-0.0420872	-0.00616042	-0.0545058	-0.0711402	0.00576092	-0.0208546	-0.00923499	0.0296246	0.00375695	-0.0631805	0.0518307	0.00730489	-0.0180421	-0.0246691	-0.0478793	0.105402	-0.0106161	-0.018722	CDHR2
ENSG00000074317	grey	0.0217133	0.0561632	0.0883658	0.0277335	0.0361897	0.0166894	0.073634	0.0522005	0.220276	0.0867809	0.0218402	0.0471057	0.0344042	0.0661915	0.0196448	0.0863195	0.096257	0.10808	0.0645421	0.0676958	SNCB
ENSG00000074319	CD8T6	-0.0240235	-0.0181223	0.0452769	-0.132986	-0.0139171	0.111309	0.00428906	-0.0304571	0.013681	0.0824328	0.148436	0.00602652	-0.00792927	-0.0172207	0.18544	0.092903	0.0464478	0.0685263	-0.0961273	0.0730048	TSG101
ENSG00000034510	CD8T2	0.370962	0.549512	-0.0766439	-0.0395549	0.0373515	0.0882432	-0.066881	-0.222225	-0.0525811	-0.0156519	0.00354655	0.151206	0.172117	-0.0131558	0.0371118	-0.207876	0.0210046	-0.00654531	0.0332015	-0.108863	TMSB10
ENSG00000074370	grey	-0.0304947	-0.0619077	-0.114677	-0.0230635	-0.00264821	0.0778819	0.0118493	0.0166248	-0.0587393	-0.0901202	0.034998	-0.0141308	-0.0261709	-0.0246659	-0.0111596	0.134745	0.136138	-0.140182	0.00344442	0.0177364	ATP2A3
ENSG00000074416	grey	-0.0670078	-0.0476356	0.00535355	0.0517245	0.0347967	-0.0508437	-0.000677695	-0.0104167	0.0637766	0.0212513	-0.0439516	0.0197749	-0.12033	0.000999494	0.0037639	-0.0530614	-0.0608545	-0.037664	-0.0348695	0.0449507	MGLL
ENSG00000074590	grey	-0.00185543	0.0286368	0.0196852	0.00794161	0.0487899	-0.0361572	0.224985	0.0521532	0.0372829	0.0870791	0.0643167	-0.0144864	0.0534099	-0.0244608	0.0620639	-0.00158459	-0.0183484	0.0795046	-0.000637633	0.132407	NUAK1
ENSG00000074603	CD8T13	-0.000419824	-0.0313934	0.0567145	-0.0255539	0.0621533	-0.0374597	-0.00145556	0.0430626	0.000354528	0.0259899	0.0740591	0.0126771	0.0889533	0.146043	0.088397	0.0212537	0.124105	0.0970121	-0.109893	-0.0532525	DPP8
ENSG00000074657	CD8T13	-0.0730615	-0.0544296	0.0440988	0.0253509	-0.0367603	-0.106694	0.0767138	0.105899	0.211432	0.0341699	0.0244904	0.00739645	0.0305281	0.143331	0.203398	0.0101966	-0.0232655	0.108098	-0.113895	0.03468	ZNF532
ENSG00000074695	grey	-0.0144107	0.0963974	0.0391524	0.101753	0.0258063	0.0941444	-0.0101661	0.0379281	0.0403152	0.0765958	-0.0211796	0.0566809	-0.0659244	0.00644421	0.0731756	0.0495114	-0.0115033	0.0589512	0.108609	0.090299	LMAN1
ENSG00000074696	CD8T12	0.0179986	0.0194539	0.0865903	0.00145916	-0.0157087	0.144315	0.147405	-0.150169	-0.0040156	0.0915461	0.0399311	-0.00461242	0.16593	-0.0203235	0.0442866	-0.00383157	-0.00185365	-0.00660364	-0.028291	-0.00435336	HACD3
ENSG00000074706	CD8T13	-0.0103317	0.0128086	0.038257	0.14446	0.124863	-0.0701716	0.04646	0.109939	0.110384	0.0239724	-0.0413781	0.0581775	-0.0415552	0.243095	0.186807	0.0985417	0.0428988	0.198661	0.0317649	0.139919	IPCEF1
ENSG00000074755	grey	0.00234579	0.0353715	-0.0357633	0.0576477	0.0686024	0.0646309	0.0982426	0.132424	0.0383128	0.0390536	-0.0132188	-0.102884	0.090326	0.13246	0.128894	0.0861745	0.0682344	0.0577054	0.0230697	-0.00297382	ZZEF1
ENSG00000196154	CD8T2	0.407115	0.54767	-0.0291497	0.0622667	0.0952544	0.171924	-0.103281	-0.193599	-0.0985361	-0.0139463	-0.0908891	0.221613	0.22097	0.112593	-0.0144011	-0.240742	-0.0189094	0.0775564	0.0128406	-0.0868852	S100A4
ENSG00000074842	grey	0.0239519	0.0712551	0.000738664	0.0429075	-0.00877066	0.0665269	-0.104048	-0.0998689	-0.00109641	-0.00193499	-0.0124539	0.102547	0.0198516	0.000187899	0.0452675	-0.0866775	-0.0486728	-0.116158	-0.0516361	-0.0709887	MYDGF
ENSG00000074935	grey	-0.087313	-0.0472055	0.00563642	0.0684519	0.0454749	-0.0823258	-0.042843	0.055073	0.00819854	0.0110497	0.018397	-0.145412	0.0243787	-0.0316861	-0.0944224	0.0275119	-0.0424394	0.0525058	0.173804	0.00597567	TUBE1
ENSG00000156650	CD8T4	-0.228792	-0.113158	0.0823736	0.298002	-0.0477083	-0.1182	0.0960848	0.232567	0.104334	0.10599	-0.198521	-0.0133416	-0.137983	0.0639122	-0.0431207	-0.00408142	-0.128832	0.00464933	0.18555	0.133119	KAT6B
ENSG00000075043	CD8T12	0.119493	0.102456	-0.0865969	-0.090533	-0.0340516	0.0448237	-0.0327646	-0.0772584	-0.0955065	0.0621569	0.0276651	-0.0710692	0.0995399	-0.0219952	-0.0551183	-0.190528	-0.0809236	0.0734603	-0.0514132	-0.119019	KCNQ2
ENSG00000075089	CD8T17	0.0921313	0.142612	0.0230844	0.0434643	0.0140918	-0.0622839	-0.0198195	0.0928624	0.138447	0.0572678	0.00161713	0.0978054	0.0170798	-0.0366924	0.0714589	0.0520097	-0.0521496	0.198263	0.0347944	0.0781985	ACTR6
ENSG00000075142	grey	0.0494402	-0.00522692	0.0304548	0.0525103	0.0540076	0.0416806	0.0841977	0.0146914	-0.00432287	0.0543639	-0.0326597	-0.0540923	0.0169609	0.0235484	-0.0140687	0.0326874	-0.05591	0.0489279	0.0125717	-0.0345468	SRI
ENSG00000075151	grey	0.0423021	-0.00936504	-0.0667765	-0.0630682	0.0168492	0.0630541	0.0453467	0.0118288	-0.0926168	0.0398579	0.127053	-0.0321414	0.0433083	0.0441742	-0.0209676	0.00886919	0.0883326	-0.0198836	-0.0950211	-0.000433775	EIF4G3
ENSG00000075188	grey	-0.035819	-0.0538181	0.0766726	0.133757	0.0266401	-0.0429665	0.0575904	0.0807055	0.115733	0.0656679	-0.112536	0.117073	-0.138899	0.220058	-0.064175	0.048003	0.109826	0.0603917	-0.0187855	0.0987865	NUP37
ENSG00000124614	CD8T2	0.315631	0.543572	0.0107834	0.073552	0.0728914	0.0972107	-0.0444744	-0.0420676	-0.0346718	0.132141	-0.0729244	0.223311	0.140878	0.105195	0.0908507	-0.174554	0.0944627	0.0766334	0.0424353	-0.0461557	RPS10
ENSG00000186654	CD8T4	-0.16966	-0.0979163	0.141422	0.297266	-0.199394	-0.111818	0.123977	0.1617	0.0779299	0.0215676	-0.145719	0.0956917	-0.133662	0.0479296	-0.0388659	0.1873	0.0250694	-0.0264537	0.104219	0.241396	PRR5
ENSG00000162599	CD8T4	-0.143595	-0.0278301	0.0128357	0.297188	-0.00671006	-0.110223	-0.0544042	0.0305301	0.0307124	-0.0851068	-0.301081	0.0681216	-0.22509	0.0179586	-0.109537	-0.0691931	-0.155505	0.0196813	0.152721	0.0761628	NFIA
ENSG00000075292	grey	0.0497986	-0.0267545	0.0239882	0.0115613	-0.05199	-0.0309124	0.146858	0.124514	0.0287242	0.0127391	0.110988	0.0858924	0.0143144	0.095298	0.0614232	0.0261143	0.092573	0.0141287	-0.00669681	0.076838	ZNF638
ENSG00000075303	CD8T12	0.00775744	0.0558786	-0.0576754	-0.0031632	0.0918327	0.0406741	0.0392119	-0.0908398	-0.107848	0.110484	0.0129641	-0.0498736	0.109211	-0.0599781	-0.0249617	-0.0369098	0.0241033	-0.0134968	0.00625666	-0.0185119	SLC25A40
ENSG00000075340	CD8T19	-0.020336	0.0149528	0.0899611	0.060337	-0.0773803	0.0150172	0.0274136	-0.037842	0.0684349	0.128971	-0.0635201	0.0874389	-0.013138	-0.0572429	-0.115718	0.0319789	-0.0359735	-0.0124206	0.0686027	0.166471	ADD2
ENSG00000075391	CD8T7	-0.0558912	-0.01488	0.0802868	0.0194414	-0.000932653	-0.0394263	0.175736	0.127492	0.195928	0.230198	0.0305076	0.0381736	-0.0170012	0.0239375	0.0814187	0.0807915	-0.086871	0.180502	0.065541	0.094421	RASAL2
ENSG00000075399	grey	-0.0306427	0.00684514	0.0253706	-0.0498543	-0.108528	0.0368183	-0.001954	0.0479507	0.131294	-0.045193	0.00220379	-0.0837466	0.0316801	-0.0426817	0.0214241	0.0138795	0.0226982	-0.00814105	-0.0754222	0.0307425	VPS9D1
ENSG00000075407	CD8T3	-0.079042	0.0254974	0.224321	0.126775	-0.0600381	-0.0194858	0.0631398	0.0469178	0.119795	0.0527321	-0.00759658	0.163574	-0.115468	0.0584702	0.0309917	0.125142	0.0157558	0.0434588	0.0174404	0.0990673	ZNF37A
ENSG00000075413	grey	-0.0923375	-0.179607	0.0917214	0.0457803	0.105065	0.0120103	0.0534533	0.126357	0.00961768	-0.0213772	0.14916	-0.127968	0.0328166	-0.0698949	0.00351768	0.123228	0.00547431	-0.0800838	0.0562023	0.00986147	MARK3
ENSG00000075415	grey	0.025788	-0.00223373	-0.0215776	0.0357714	-0.131206	-0.0305494	0.00824145	0.0481586	-0.0536264	-0.00436228	-0.0604548	-0.0365325	-0.00347021	0.000719092	-0.0574494	-0.0135749	0.00211889	0.0167421	0.0249688	0.00210132	SLC25A3
ENSG00000075420	grey	-0.160039	-0.0677104	0.155922	0.0776704	-0.13869	0.0413521	0.110054	0.0435761	-0.00029556	0.105983	-0.0306812	0.108706	0.0473243	-0.0145191	0.0561648	0.119625	-0.121067	-0.162197	0.00152005	0.175161	FNDC3B
ENSG00000160593	CD8T4	-0.129831	-0.0132316	0.0634838	0.295322	0.0362635	-0.15309	-0.0833606	0.0729942	0.0289834	-0.0689804	-0.310412	0.0601902	-0.170239	0.0936284	-0.158268	0.0285331	-0.0847164	-0.0551069	0.242416	0.0841257	JAML
ENSG00000075539	CD8T7	-0.081784	-0.174288	-0.0378366	0.0527307	0.0381183	-0.0313958	0.0364587	0.0942211	0.0638887	-0.0599442	0.0240314	-0.0174206	-0.0141367	0.0280163	0.0325623	0.0860012	0.0520709	-0.0232654	-0.0053793	0.137332	FRYL
ENSG00000075568	CD8T15	-0.0391094	-0.0251733	0.059853	0.0143142	-0.00602011	0.160514	-0.0151012	0.0982715	-0.00631554	-0.0817968	0.0479082	-0.0274236	-0.0322032	-0.0255487	0.0998714	0.238587	0.14315	-0.132719	0.0150133	0.0520445	TMEM131
ENSG00000198938	CD8T2	0.38167	0.537106	-0.0519595	-0.0625113	-0.00437149	0.1135	-0.0910101	-0.209128	-0.04522	-0.0502899	-0.0158279	0.258616	0.134064	0.0821132	0.0528296	-0.128946	0.0887804	0.119042	0.0412384	-0.093057	COX3
ENSG00000075651	grey	0.0226457	-0.0336771	0.12928	0.0423944	0.0245473	0.171395	0.190622	0.0524519	0.0617257	0.00691805	0.0875925	-0.00299697	0.0498569	-0.0392863	-0.112327	0.175459	0.138397	-0.0591388	0.0442435	0.0679856	PLD1
ENSG00000075711	grey	0.0299652	0.00810232	-0.0370785	0.0806521	0.00139011	0.0482915	0.0812244	0.0103722	0.0578107	0.0219518	0.0228839	0.0151482	0.0669341	0.0956124	-0.0579913	-0.00442549	0.0340253	0.0836614	-0.0169142	0.0351414	DLG1
ENSG00000075785	grey	0.0231248	-0.015294	-0.00857185	0.0249932	0.0383758	0.128015	0.172647	0.0186988	-0.10955	0.0489588	0.165009	0.0658297	0.100705	-0.0101572	0.0611178	-0.00991231	0.0724939	0.0224212	0.0753677	0.0467498	RAB7A
ENSG00000075790	grey	0.0754892	-0.0874831	0.0360956	-0.122668	0.0125681	0.0129678	-0.0034672	0.0518393	0.0586271	-0.0744184	0.181089	-0.0801404	0.0690213	0.0179717	0.0342174	0.133954	0.129295	0.0664961	-0.0812006	-0.044067	BCAP29
ENSG00000075826	CD8T12	0.10629	0.0198421	-0.062622	-0.032407	0.0562516	0.109075	-0.00263316	-0.0367573	-0.049864	0.0433087	0.0678386	-0.0142559	0.188542	0.044977	0.0516483	-0.0866226	0.0454458	0.0317349	-0.0406969	-0.0657926	SEC31B
ENSG00000075856	grey	0.009623	0.182238	-0.0112334	0.0789917	-0.00598454	-0.0468718	-0.10789	0.096186	0.060665	-0.0719988	-0.0765057	-0.00292589	0.00345754	-0.0309558	-0.00024951	-0.0267412	-0.0388744	0.0604285	0.00876151	0.0535425	SART3
ENSG00000075884	CD8T10	0.107858	-0.0567333	-0.000255567	-0.103188	0.00923349	0.132411	0.0398997	0.150043	0.0271527	-0.0101019	0.267372	-0.0634942	0.135552	0.00179762	0.110057	0.127622	0.159122	0.0239259	-0.0180876	-0.0554509	ARHGAP15
ENSG00000075914	grey	0.0123337	0.0908455	-0.0281192	0.0289806	0.0124393	-0.0656862	-0.0622744	-0.112691	-0.0168239	-0.00108534	-0.0854841	-0.0922235	-0.0354557	-0.0143836	-0.0824748	-0.206763	-0.153451	-0.117225	-0.00541135	-0.00328411	EXOSC7
ENSG00000113448	CD8T4	-0.291181	-0.148491	-0.032837	0.294794	-0.12422	-0.314604	0.0454774	0.183373	0.102151	0.060319	-0.239321	-0.0584726	-0.266338	-0.00303858	-0.0921275	0.0904473	-0.270149	0.0981332	0.172099	0.234222	PDE4D
ENSG00000075975	CD8T10	0.0165401	-0.0548806	-0.0446351	-0.0373001	0.031109	0.0378864	0.121881	0.0731927	0.0976853	-0.00515783	0.0760678	-0.0987935	0.0480046	-0.0186195	0.0429073	0.0481961	0.10566	0.0630581	0.0138963	-0.039047	MKRN2
ENSG00000076003	grey	-0.00838944	0.0151315	0.0751796	0.067827	0.0859745	0.0338473	0.0461244	0.0209467	-0.0714717	-0.0135285	0.00708788	0.0226024	0.0105883	0.0164321	-0.10117	0.0463913	0.00129523	-0.0574719	0.153622	0.0470947	MCM6
ENSG00000076043	CD8T5	0.0852422	0.039784	-0.0255063	-0.0920316	0.164745	0.0695113	0.0223676	-0.0459958	-0.101371	0.0453571	0.0762043	-0.0493274	0.123991	-0.122324	-0.103989	-0.0522622	0.0213781	-0.017611	0.0278543	-0.148803	REXO2
ENSG00000076067	grey	-0.0331194	-0.0352541	0.0288128	0.028742	0.0482071	0.0682072	-0.019073	-0.00432729	0.0659204	-0.0133184	-0.00613014	0.0180794	0.0748634	-0.125433	0.0651969	0.0150644	-0.100584	-0.021297	0.0706026	0.0593575	RBMS2
ENSG00000076108	grey	0.0268407	0.0101005	0.0386211	0.0628736	0.0348883	-0.035444	-0.00669116	0.117935	-0.0184105	-0.0271294	-0.0284712	0.0255265	0.0383174	-0.0514529	-0.0137964	0.0989199	0.0392921	0.0284517	-0.0109005	0.0271107	BAZ2A
ENSG00000076201	grey	-0.00537887	-0.00606554	-0.0347426	-0.0647243	0.165137	0.177571	0.0612386	0.0204803	-0.00249602	0.0168162	0.0816826	0.0296886	0.202432	-0.0615404	0.0501708	0.0260948	0.106988	-0.0591837	-0.00140043	-0.0109639	PTPN23
ENSG00000076242	grey	-0.0345286	-0.112599	-0.0121917	0.100502	-0.0942855	0.0033968	-0.00690027	0.0621266	-0.0157725	0.0151083	-0.0364199	0.0185145	-0.0748871	0.0099578	-0.0409755	0.0624794	0.0151921	-0.0990755	0.0198475	0.049537	MLH1
ENSG00000075426	CD8T4	-0.0995407	-0.0413905	0.0365065	0.292144	0.080429	-0.144506	-0.0407253	0.127853	0.0379471	0.0124727	-0.235812	0.0197931	-0.0650505	0.0210354	-0.158334	-0.00144118	-0.114604	-0.0422089	0.228133	0.154101	FOSL2
ENSG00000076321	grey	-0.0933816	-0.0847971	0.0847116	0.052512	-0.181055	0.136775	0.0725103	-0.00854835	-0.0444389	0.0764437	-0.0311153	0.0426836	0.00307839	-0.0579826	0.0160997	0.0865581	0.0644325	-0.127985	-0.146468	0.129038	KLHL20
ENSG00000076356	grey	-0.102803	-0.138176	-0.0172249	0.0319386	0.0782107	0.032086	0.0899473	0.00680939	0.0527594	0.0629754	0.0333676	-0.0550213	0.00137964	-0.0923361	0.0303443	0.0483179	-0.0262743	-0.0355949	0.105656	0.0724099	PLXNA2
ENSG00000076513	grey	-0.0381498	0.0667868	0.0601152	0.0531536	0.00692317	0.0378607	0.00826173	-0.12126	0.0687585	0.125898	-0.0494183	0.0744224	0.0693985	0.043087	0.0184931	-0.0585495	0.0492798	-0.0280173	-0.10694	-0.0339078	ANKRD13A
ENSG00000196914	CD8T4	-0.130047	-0.00866903	0.0491916	0.287239	-0.110737	-0.164657	0.0345019	0.129154	0.0134354	-0.0826451	-0.214453	0.0457736	-0.132829	0.0431749	-0.0907225	0.143693	-0.00921308	0.0273151	-0.00979507	0.0810854	ARHGEF12
ENSG00000076555	grey	-0.080844	0.0251592	0.0673459	0.0833776	-0.0136815	-0.0586943	-0.0825159	-0.0177115	-0.0771306	-0.0111263	-0.100578	-0.0182184	0.000606795	0.168264	-0.121868	-0.0439536	-0.0218101	-0.0377825	-0.000822987	-0.057326	ACACB
ENSG00000076641	grey	-0.195006	-0.0870064	0.210291	0.269406	-0.0353189	0.0534018	0.0574285	0.0178144	-0.0369909	0.0307885	-0.169825	0.0211774	-0.0513911	-0.00771281	-0.130773	0.107351	-0.0600596	-0.104722	0.131252	0.0878483	PAG1
ENSG00000076650	grey	0.0182189	-0.0163986	0.137193	-0.0095244	0.100625	0.0564774	0.052896	0.00118568	0.0259707	0.144477	0.0989981	0.0563862	0.177821	0.0469761	0.0315902	0.00219466	0.0307161	-0.0260959	-0.0897488	0.0541518	GPATCH1
ENSG00000076662	CD8T13	0.0935188	0.122289	0.0051253	-0.0211713	0.0731699	0.0909147	0.0589144	0.0679527	0.0143534	0.0422071	0.0567411	0.00788465	0.100991	0.0974871	0.0334331	0.0447646	0.134549	0.117417	-0.0191439	0.00513162	ICAM3
ENSG00000076685	CD8T9	0.00756677	0.0150752	0.0300275	-0.00718379	-0.0401896	0.0392061	0.0176222	-0.0523665	0.00730542	0.103828	0.0709499	-0.0491967	0.101716	-0.0253125	-0.0389432	-0.0914065	-0.0704753	0.0387078	-0.0454542	-0.00885047	NT5C2
ENSG00000076770	grey	-0.0204308	-0.0996958	-0.0823114	-0.0135166	0.0936196	0.0284469	0.0755312	-0.0283665	0.037266	-0.0195637	0.0834589	-0.0414728	0.048651	-0.0217672	-0.0347542	0.0297491	0.0887673	0.0112799	-0.0425438	0.0541644	MBNL3
ENSG00000076864	grey	0.0629664	0.0100315	0.0242965	-0.018011	0.036477	0.0623557	0.181615	-0.0277459	-0.0181088	0.159286	0.0283754	0.049895	-0.0178126	-0.0233057	-0.0908252	0.0187406	-0.00284662	0.00764413	0.0161073	0.0622579	RAP1GAP
ENSG00000076928	CD8T13	0.0654184	0.107776	-0.0336581	0.115346	0.0238664	0.0233947	0.0496762	0.0722528	-0.0605703	0.108353	-0.0938442	0.138342	-0.0121449	0.155037	0.0298573	0.00422505	0.00273916	0.0093506	0.0849119	-0.0205212	ARHGEF1
ENSG00000076944	CD8T13	0.0258765	0.040883	0.0769419	0.0592986	-0.0179807	0.106673	0.0883505	0.0331454	0.133804	0.115594	-0.0660538	0.124416	-0.0263481	0.185529	-0.00446251	0.00604876	0.15233	0.144048	-0.0161274	0.130412	STXBP2
ENSG00000076984	grey	0.0475391	0.0950352	0.0879884	-0.0185425	0.076692	0.10404	-0.00628074	0.0604254	0.0921176	0.0336279	0.111945	0.0815476	0.1229	0.00662609	0.0589727	-0.00617146	0.00595512	0.0361336	0.0127619	0.0060023	MAP2K7
ENSG00000077044	CD8T5	0.123576	0.146031	-0.0167143	-0.085871	0.118178	0.127168	-0.179048	-0.013328	0.000313022	-0.0885243	0.0716227	0.0524166	0.0378041	-0.0704789	0.068654	-0.0390536	0.04527	-0.00943514	-0.0410767	-0.13074	DGKD
ENSG00000077063	grey	-0.164185	-0.152484	0.148634	-0.0256707	-0.176727	0.0327692	0.177433	0.0289433	0.13854	0.208941	0.0121346	0.0179121	-0.0986743	-0.0185931	-0.049068	0.106255	-0.05558	-0.0274867	-0.0511734	0.127162	CTTNBP2
ENSG00000077092	CD8T1	0.0983968	0.0554127	0.119232	0.0112363	0.0706021	0.0244823	0.0521376	-0.0218048	0.0024882	0.0700904	0.0479224	0.0842336	0.00757042	0.0707932	0.00784823	-0.00812994	0.072829	0.0926015	0.0171366	0.0343937	RARB
ENSG00000077097	grey	-0.0210512	-0.0244815	-0.0540548	0.0729371	-0.0071897	-0.226072	-0.116354	0.082806	0.0308277	-0.0900178	-0.0636754	-0.05961	-0.119127	0.0698828	-0.0065642	-0.0533602	-0.022062	0.164632	0.0575135	-0.0427115	TOP2B
ENSG00000077147	grey	0.00277009	0.00543909	0.0444469	0.0336456	0.0933492	0.0246136	0.131545	0.145637	0.0312326	-0.0164561	0.0932509	0.0233032	0.0377469	-0.0250809	-0.0949396	0.226875	0.108323	0.0610408	0.0687259	0.0765004	TM9SF3
ENSG00000008517	CD8T2	0.396187	0.534787	0.0105864	-0.0562629	0.0531116	0.224391	-0.00978405	-0.198622	-0.0203779	0.0208463	0.0412389	0.223069	0.301583	0.0333238	0.0701273	-0.173041	0.0820294	0.137766	0.00369225	-0.0695922	IL32
ENSG00000077232	grey	-0.0179336	-0.0294061	0.0532955	0.0615187	-0.00329257	-0.0123881	-0.107195	-0.0262162	-0.0997054	-0.0469198	-0.0791268	0.0499136	-0.104251	0.104447	-0.0356516	-0.0571121	0.0209527	-0.0357407	-0.0738764	0.00907664	DNAJC10
ENSG00000077235	grey	0.147463	0.0442674	0.0719545	0.0566034	0.0647774	0.00753141	-0.020533	0.0867582	0.103236	-0.0436053	0.0644037	0.125102	0.102559	0.142784	0.00117135	0.134039	0.162356	0.193022	0.0711635	0.0634474	GTF3C1
ENSG00000077238	CD8T7	-0.0641139	0.00751462	0.00797472	0.090219	0.031037	-0.123817	0.0615453	0.15859	0.118378	0.0611079	-0.0127751	-0.0154358	-0.0194502	0.0372025	0.0820169	0.0912484	-0.0195455	0.0956459	0.119862	0.133382	IL4R
ENSG00000077254	grey	-0.00923505	-0.0732955	0.00183812	-0.00721625	0.0566735	0.0839852	-0.0222917	0.0318687	-0.0151124	-0.0532906	0.00115	0.0515763	-0.067628	0.00911697	-0.0356507	0.0758123	0.100422	-0.0757068	0.0435322	-0.0478414	USP33
ENSG00000077264	CD8T9	-0.166664	-0.11423	0.0837235	0.00370377	0.0188205	0.0767752	0.100978	-0.0338404	0.0560502	0.247343	0.0477355	0.0225285	-0.06617	0.0337696	0.0963627	0.0603141	-0.0458009	0.0172198	-0.069974	0.129956	PAK3
ENSG00000077312	grey	-0.0786513	-0.0549882	0.241073	-0.102976	-0.0269049	0.173395	0.0657114	0.00244393	0.0559397	0.0570707	0.130692	0.0164864	0.0804947	-0.0202502	0.054613	0.121823	0.0538767	-0.149134	-0.0392442	-0.0105171	SNRPA
ENSG00000077380	CD8T1	0.220656	0.189833	-0.0724864	-0.149903	0.0417429	-0.000708027	-0.0166625	-0.0606003	-0.0463419	-0.0355229	0.116774	0.03843	0.106885	-0.0328114	0.0176286	-0.123556	0.0852094	0.0514542	-0.0489982	-0.114118	DYNC1I2
ENSG00000077420	CD8T15	-0.0935699	-0.121345	0.0780874	0.0923064	-0.00789519	0.0122741	0.0908574	0.167305	-0.0711802	-0.0134608	0.0264873	-0.00175277	0.00553551	-0.0144839	-0.00254085	0.299604	0.145565	-0.116839	0.0637334	0.0613891	APBB1IP
ENSG00000077454	grey	-0.0252195	5.50813e-05	-0.0221347	-0.0137335	-0.0743229	-0.00688032	-0.0554791	-0.0268255	0.0582242	0.0773736	-0.0250008	-0.0796233	0.00168518	0.0197757	0.0736438	-0.0177841	-0.0320318	0.0350265	-0.0392757	-0.0482563	LRCH4
ENSG00000077458	grey	0.0394243	0.0429214	-0.118084	0.0105001	0.205528	-0.049754	-0.01485	-0.02084	-0.0406532	-0.0432947	0.0576456	-0.00542116	0.102855	-0.0279206	-0.0602571	-0.126393	-0.0335847	0.0467105	0.126976	-0.0151014	FAM76B
ENSG00000077514	grey	0.0557737	-0.00167725	0.0332033	0.024453	0.00305507	0.0597131	0.215529	0.0600903	-0.0821607	0.0532982	0.0616404	-0.00767589	0.0658796	0.0294991	-0.0663123	0.0807063	0.0707537	-0.091547	0.0538264	0.0393258	POLD3
ENSG00000077549	grey	-0.0577074	-0.0867126	0.0102105	0.0666228	0.000452494	0.0248709	0.0385342	0.0411525	0.0145503	0.0735259	-0.00142014	-0.00160851	0.0262296	0.00361062	0.0562431	0.0238677	-0.0390122	0.0059299	0.129444	0.0498976	CAPZB
ENSG00000077585	CD8T10	0.124646	0.0513245	-0.0354643	-0.167334	0.0990106	0.0746039	-0.118177	0.0574348	0.0750219	-0.134787	0.145273	-0.147404	0.0368278	-0.0607834	0.12662	0.059772	0.0135452	0.0247881	-0.0180511	-0.0556773	GPR137B
ENSG00000077616	grey	0.0831496	0.101029	0.0491798	0.0193875	0.0293998	0.103695	0.108464	-0.0163578	-0.0117251	0.071525	0.0615148	0.0312854	0.165814	0.041265	0.034962	-0.0354376	0.0602905	0.020552	-0.00447679	0.0312828	NAALAD2
ENSG00000077684	grey	0.0652601	0.0275734	0.06109	0.0147627	-0.0333019	0.153477	0.127664	0.0311229	-0.0232223	0.0490949	0.0545268	0.0967948	-0.0342777	0.0913412	0.0540659	0.0939547	0.155785	-0.0475892	0.056919	0.0430461	JADE1
ENSG00000185345	CD8T4	-0.0846354	0.0189329	0.159867	0.28647	-0.130049	-0.115477	0.187048	0.153697	0.147014	0.196062	-0.185529	0.14071	-0.0947545	0.244684	-0.0551725	0.0332836	-0.0710033	0.0812785	0.0232478	0.082758	PRKN
ENSG00000077721	grey	-0.0732205	-0.00307604	0.0351794	0.127407	0.0375273	-0.0962964	0.133154	0.0730136	0.00417702	0.00553742	0.00126366	-0.0230928	0.0336181	-0.000168674	0.0403242	0.0698255	-0.077834	0.0116213	0.0161244	0.0611855	UBE2A
ENSG00000099204	CD8T4	-0.113864	-0.0427136	0.0365841	0.284765	-0.0759662	-0.0991424	-0.0118452	0.145035	0.0409201	-0.024802	-0.215474	0.0267125	-0.110736	-0.0647197	-0.121936	0.0832976	-0.0811771	0.00750879	0.185685	0.164322	ABLIM1
ENSG00000077984	CD8T1	0.425868	0.337602	-0.235654	-0.228129	0.198529	0.169218	-0.0599554	-0.189557	-0.0656071	-0.135683	0.193928	0.0931714	0.270535	-0.0743701	0.107573	-0.167252	0.0663623	0.118813	0.0381547	-0.20847	CST7
ENSG00000078018	CD8T15	-0.0178244	-0.0837002	0.0938238	-0.095418	0.0448107	0.0583363	0.145738	0.0309837	0.150443	0.115684	0.100499	0.0567879	-0.0237806	0.0758806	0.0329185	0.0772465	0.0524741	0.0771784	0.0178422	0.118892	MAP2
ENSG00000078043	grey	-0.0051186	-0.0343709	0.0418366	0.0046211	0.0617641	-0.00964978	0.109788	0.157078	0.12751	0.0380964	0.0763272	0.023589	-0.0172447	0.0895414	0.0881619	0.189892	0.0217289	0.0510274	-0.079476	0.0152874	PIAS2
ENSG00000078053	grey	0.0120668	0.0122151	-0.0896915	0.104293	-0.00824609	-0.111307	0.0698586	0.0541823	0.0204515	0.015512	-0.0839004	-0.0664562	-0.020577	0.10475	0.0741434	0.022479	0.00653283	0.159748	-0.0371177	-0.0592014	AMPH
ENSG00000078061	CD8T13	0.0548003	0.104342	-0.0220411	-0.0379195	0.0957711	-0.0791954	-0.0839094	-0.109183	0.0238235	-0.0675261	0.0271176	0.0975308	-0.0240228	0.0708294	0.00314792	-0.0810558	-0.0451695	0.0598833	-0.0384681	-0.0872365	ARAF
ENSG00000078070	CD8T9	0.00809029	0.0719798	-0.0174259	-0.0527129	-0.0656417	-0.0218658	-0.0390681	-0.0462641	-0.0210506	0.0891752	-0.0522889	0.131604	0.00806073	0.092183	0.0655153	-0.135159	0.00750822	-0.0225371	-0.117249	-0.0708126	MCCC1
ENSG00000078114	CD8T13	-0.00832234	0.0489407	0.0625716	0.0829657	0.0845397	-0.0596911	0.0965273	0.132265	0.13494	0.162565	-0.0328866	0.147694	-0.0424823	0.14946	-0.0217221	-0.0891086	-0.0394376	0.173576	0.127291	0.0909688	NEBL
ENSG00000078124	grey	-0.0273302	-0.0678703	0.0342634	0.092635	-0.00390371	-0.0273022	-0.00767948	0.0924219	0.117216	-0.035422	0.0635449	0.0354408	0.0664442	0.147664	0.10363	0.0858802	0.029843	0.0493314	-0.114539	0.0131057	ACER3
ENSG00000078140	CD8T10	-0.0936482	-0.100332	-0.0234964	-0.0942286	0.0920886	0.0404219	0.0481744	0.0300002	-0.0237873	-0.108605	0.158113	-0.199288	0.0795049	-0.0115244	-0.0621218	0.177145	0.0656928	-0.0682656	-0.0108759	-0.0359867	UBE2K
ENSG00000078142	grey	0.0204682	0.0322153	0.0461319	0.155733	0.0197142	-0.0287924	0.0635489	0.161308	-0.0323908	0.0777784	-0.0538188	0.0378552	0.0322944	0.0744575	-0.0193853	0.0443792	0.00640063	-0.0409952	0.0536575	-0.0317211	PIK3C3
ENSG00000206560	CD8T4	-0.108361	0.0403744	0.0876525	0.282133	0.00467713	-0.146579	0.0280308	0.151125	0.12147	0.107871	-0.162147	0.0129777	0.0389813	0.210067	0.0363957	0.0397261	-0.0879834	0.107162	0.0385399	0.128078	ANKRD28
ENSG00000164120	CD8T4	-0.139042	0.0244777	0.0136276	0.279869	0.0731632	-0.0914623	0.0449185	0.163823	0.133787	0.06749	-0.19821	-0.0217478	0.0189267	0.0282464	-0.0325211	-0.0270683	-0.191165	0.028906	0.143643	0.227206	HPGD
ENSG00000078246	grey	-0.0177081	-0.0475909	-0.00832127	-0.0593494	-0.025352	-0.0911558	0.210364	0.1081	0.0935568	0.0737645	0.115178	-0.0508723	0.0260959	0.0403461	0.0837578	0.0246509	0.0764364	0.113107	-0.0190685	-0.00184736	TULP3
ENSG00000078269	grey	-0.0661745	-0.0703496	0.107836	-0.00143836	0.0480539	-0.0877668	0.00763678	0.0916499	0.265673	0.00898794	0.0502496	-0.00902341	-0.0177775	0.0797626	0.0859555	0.0788366	-0.031923	0.0696287	0.0571459	0.140587	SYNJ2
ENSG00000078295	CD8T13	-0.0690096	0.00923303	0.0846011	0.0271184	-0.0084901	-0.0468483	0.120773	0.0787735	0.268095	0.191938	0.000193623	0.0806688	-0.0755421	0.248408	0.0976957	0.0489461	0.0284782	0.224493	0.0483202	0.107865	ADCY2
ENSG00000078304	CD8T5	0.183099	0.0606472	-0.186645	-0.0918315	0.393002	0.00352538	-0.100953	-0.00416793	-0.0773623	-0.0923507	0.194728	-0.127587	0.059281	-0.132493	-0.0896912	-0.08573	0.0043794	0.122845	0.0781733	-0.204121	PPP2R5C
ENSG00000078328	grey	-0.148047	-0.206269	0.113133	-0.0319241	-0.108787	0.0504047	0.229086	0.048412	0.157777	0.280404	0.0132058	0.0755685	-0.0447756	0.0178367	0.0801182	0.161427	-0.070767	0.139042	0.0155602	0.18755	RBFOX1
ENSG00000078369	grey	0.05712	-0.0633022	-0.0334936	-0.0478961	-0.0513692	-0.0521364	0.000481566	0.0819742	0.0552908	-0.126536	0.0508902	-0.124083	0.0623997	-0.0370778	0.0259806	0.0738193	-0.0249475	0.048277	0.0744828	-0.0785471	GNB1
ENSG00000159733	CD8T4	-0.12661	-0.0827306	0.184298	0.27634	-0.162636	-0.0329157	0.0153422	0.0427663	0.072241	0.0228996	-0.208253	0.0449911	-0.129518	0.109987	-0.131091	0.0465337	0.018134	-0.107423	-0.0376325	0.151856	ZFYVE28
ENSG00000078589	CD8T16	0.0640364	0.0826304	-0.0349101	-0.0221659	0.0775276	-0.0423177	-0.0643797	0.0693509	0.0374577	-0.0418454	0.0606716	-0.072899	0.097247	0.0655365	0.0704972	-0.0076333	0.139031	0.0218841	-0.0566498	-0.0644514	P2RY10
ENSG00000265681	CD8T2	0.382829	0.532181	-0.0453722	-0.0232914	0.0986632	0.0973487	-0.165358	-0.0335134	-0.065641	-0.100806	-0.0785579	0.202538	0.136179	0.00854004	0.00175681	-0.216018	0.00968218	0.110479	0.0462587	-0.201444	RPL17
ENSG00000078618	grey	0.00278685	0.100319	0.110898	0.0372639	0.0482753	0.102651	0.104823	-0.0863479	-0.0620337	0.0878885	-0.0278579	0.00641319	0.126633	-0.00547324	-0.0506781	-0.0454908	-0.0260006	-0.168088	-0.00197133	0.0449241	NRDC
ENSG00000136848	CD8T4	-0.119764	-0.097325	0.225389	0.274308	-0.142662	-0.0172045	0.0282006	0.270363	0.147204	0.12827	-0.1773	0.122579	-0.17993	0.213383	-0.017857	0.169747	-0.0174113	0.00314446	0.0885755	0.115437	DAB2IP
ENSG00000078674	CD8T3	-0.0222721	-0.0291404	0.218348	0.072267	0.0140192	0.0175729	0.149264	0.132471	0.0575752	0.113848	0.0752846	0.111733	0.0595701	0.127215	0.0977404	0.158197	0.0812837	0.00474804	-0.129538	0.12415	PCM1
ENSG00000156510	CD8T4	-0.0570349	-0.0519086	0.154499	0.273483	-0.241444	-0.13174	-0.0427875	0.0666028	0.00615251	-0.0065961	-0.233523	0.107618	-0.165037	0.221145	-0.105247	-0.00745206	-0.0404524	-0.0775363	-0.0430909	0.074814	HKDC1
ENSG00000173762	CD8T4	0.097734	0.386242	0.0249795	0.271939	-0.0657246	-0.0878557	-0.0381302	0.0317914	0.000689415	0.0586668	-0.181585	0.202042	-0.059726	0.132439	0.000430359	-0.0606174	0.00945391	0.0647051	0.0623575	0.129216	CD7
ENSG00000078725	CD8T6	0.0397887	0.0321618	0.0300911	-0.0632024	0.0157	0.0873136	0.0411648	-0.0919176	-0.0781506	0.0787671	0.00984871	0.0592628	0.0427464	0.0652007	0.0245491	0.0145738	-0.00978319	-0.0588249	0.0534663	0.0300004	BRINP1
ENSG00000078747	grey	0.0188377	-0.0551779	0.00845076	-0.0538624	0.0186325	0.0182994	-0.0269304	0.000217406	-0.0735051	-0.0622218	0.0451922	0.00876281	-0.0302495	0.0229271	0.040431	0.0378039	0.0308133	-0.0139195	-0.0342944	-0.0509343	ITCH
ENSG00000078808	grey	-0.0540569	0.0171086	0.0184444	-0.0339173	0.10687	0.0692374	0.116681	0.00749474	-0.0520163	0.0185732	0.0279968	0.0266825	0.131243	-0.0639226	0.0354508	0.0877708	-0.038768	-0.0160952	0.0750838	0.038335	SDF4
ENSG00000078902	grey	-0.0519235	0.0788136	-0.00752853	-0.0345451	-0.0496909	-0.0361127	-0.0504628	-0.0401595	0.0420102	-0.0501471	0.0298668	0.068453	-0.0176381	-0.0238287	0.0415763	0.0889501	0.0489144	-0.0412938	-0.0306067	-0.0150317	TOLLIP
ENSG00000078967	grey	0.0418943	0.025676	-0.0198979	-0.0897837	-0.0103188	0.017959	-0.0399224	-0.103834	0.00574934	0.0136469	-0.0077539	-0.033903	0.0559771	0.00643526	0.0404855	-0.103449	-0.0824847	-0.00688949	-0.029188	-0.0574751	UBE2D4
ENSG00000079102	grey	-0.0303531	-0.00146188	-0.0213715	-0.0413972	-0.0289154	0.0412176	0.120455	-0.0113147	0.0455706	0.081412	0.0284549	-0.00288638	0.0664226	-0.00867093	0.1086	-0.0627218	-0.0362946	0.0367657	0.0220767	0.107474	RUNX1T1
ENSG00000079134	CD8T9	-0.067474	-0.0407028	0.0914537	0.169007	-0.136865	-0.0346425	-0.0804359	0.0404292	-0.00269835	0.00934044	-0.141619	0.0311229	-0.0978819	0.146741	-0.0984328	0.0309309	-0.0629166	0.0333998	0.0660622	-0.0587944	THOC1
ENSG00000079156	CD8T18	0.0138187	-0.0553361	-0.122809	0.0514038	0.138541	-0.0185218	0.0726686	0.0702961	-0.0164195	-0.0255945	-0.0364276	-0.12047	-0.0649006	0.00222066	-0.0477932	0.0227014	-0.0288225	0.0271865	0.159515	0.0429599	OSBPL6
ENSG00000079215	grey	-0.0180719	-7.51966e-05	0.0659054	-0.0497659	0.00863484	0.134527	0.508344	0.0397549	-0.0278804	0.134235	0.113501	0.0469308	0.0618863	0.0934773	0.136837	0.15021	0.0968086	-0.0195119	0.0174674	0.0542614	SLC1A3
ENSG00000079246	CD8T5	0.0353608	0.0187702	0.0139289	-0.0633094	0.145304	0.0651423	-0.00288223	0.0617574	-0.00982784	-0.104169	0.0798469	-0.0455912	0.0176265	-0.0925126	0.0489662	0.110227	0.0607777	0.00127838	0.0917098	0.00861029	XRCC5
ENSG00000079263	CD8T15	-0.0749167	-0.108576	0.0624469	0.00945055	-0.0391672	-0.0136493	0.0859599	0.107262	0.0927999	-0.0323081	0.0580532	0.02857	-0.0363391	-0.0154747	0.0504849	0.123287	-0.0212231	-0.00991313	0.0874428	0.106322	SP140
ENSG00000079277	grey	-0.0200294	-0.0206973	0.144514	0.074369	-0.0373068	0.0356582	0.0574238	0.100732	0.047733	0.0853269	0.0379363	0.0345102	0.0562201	0.109411	-0.000834488	0.119321	0.108854	0.00431304	0.0784953	-0.0176555	MKNK1
ENSG00000079313	CD8T10	0.0607514	-0.0479561	-0.137877	-0.13291	0.173192	0.0623953	-0.0546635	0.0437881	0.0272312	-0.0536576	0.169201	-0.0818612	0.0381266	-0.0779807	0.0362534	0.100407	0.0845614	-0.040197	0.0304725	-0.0114958	REXO1
ENSG00000163328	CD8T4	0.0138108	0.0711159	0.077992	0.271484	-0.0694582	-0.170493	-0.0847333	0.0298445	0.0356958	0.00480712	-0.27244	0.116314	-0.104267	0.222209	-0.0738067	-0.0883612	-0.0593745	-0.00035894	-0.03125	0.15799	GPR155
ENSG00000233355	CD8T4	-0.175022	-0.0848866	0.100527	0.270652	-0.151693	-0.197817	-0.0224489	0.011173	-0.0547432	0.00319475	-0.211148	0.0294291	-0.0947741	0.0458637	-0.0425046	-0.0406442	-0.130127	-0.11347	-0.0240669	0.105875	CHRM3-AS2
ENSG00000079387	CD8T12	0.0409221	-0.00381816	-0.023455	-0.0333793	0.0431894	0.0703373	-0.0133468	0.0373914	-0.0366469	-0.032659	0.0145971	-0.00965701	0.0891882	-0.00666723	0.000874363	-0.00236841	-0.00847742	-0.00347157	-0.0228953	-0.0908283	SENP1
ENSG00000079432	grey	0.0042412	0.0489249	0.0342427	-0.0282416	0.028667	0.0326029	-0.0224514	0.0348862	-0.000835691	-0.00194877	0.0324655	0.0523222	0.0166239	-0.0803185	0.0331445	0.0811256	-0.0249773	-0.14511	0.153104	0.147793	CIC
ENSG00000075624	CD8T2	0.386638	0.531689	-0.0860497	-0.0414492	-0.0242274	0.120731	0.042174	-0.163794	-0.13181	0.0351906	-0.0146058	0.150485	0.268517	0.0814015	0.0130119	-0.182399	0.024952	0.141031	-0.019061	-0.0712388	ACTB
ENSG00000079459	grey	0.0375434	0.123253	-0.0542148	-0.0494551	0.0471493	-5.3887e-05	0.0278979	-0.0303197	-0.0611637	-0.0231679	0.0630827	0.0617568	-0.00884853	-0.0319688	0.023124	0.111294	0.0365303	-0.0268683	0.0986206	-0.00148114	FDFT1
ENSG00000079482	grey	-0.0105775	-0.0804155	-0.109155	-0.0610215	0.0123677	-0.0251862	0.109568	0.0771103	0.0755246	0.0460512	0.0719851	-0.115536	-0.0452248	0.0541313	0.0930651	0.070513	0.0143269	0.0144702	0.0475027	0.0539251	OPHN1
ENSG00000079616	grey	0.0882624	0.0500344	0.0303176	-0.057835	0.103398	0.0652416	0.0515124	0.033314	0.0207907	0.0410107	0.141305	-0.0574083	0.18939	0.0255111	0.00541219	-0.0154088	0.0988297	0.105948	-0.0159181	-0.0912274	KIF22
ENSG00000079691	CD8T13	0.0462592	0.0514939	0.157367	0.0992115	-0.0688146	-0.0701152	-0.00563315	-0.00129002	0.0360382	0.169198	-0.0519538	0.176381	-0.0388072	0.235034	0.0881345	-0.0757147	0.0871013	0.0286017	-0.0706408	0.0418277	CARMIL1
ENSG00000079739	grey	-0.00670005	-0.026682	-0.0375594	0.0514957	-0.0640395	-0.0398905	0.016573	0.052285	-0.0588495	0.0342963	-0.0458055	0.0207506	-0.0564961	-0.017605	-0.0601994	-0.0614175	-0.0601779	-0.0582115	-0.136865	0.0654672	PGM1
ENSG00000079785	CD8T16	0.19901	0.0911118	-0.0810418	0.00258958	0.0593291	0.0977635	0.000749459	-0.0275554	0.0181038	-0.0759481	-0.00118135	-0.0502331	0.0343568	0.0277872	-0.0110771	-0.0405416	0.222381	0.0370888	0.0238743	-0.0369238	DDX1
ENSG00000079805	grey	-0.0324028	0.0134631	0.0318153	0.0639249	0.027102	-0.0333462	0.0844004	0.0938352	0.0232077	0.0916288	0.0920189	0.0767797	0.060618	-0.0519626	0.0734136	0.10024	0.0252811	-0.0240716	0.0305833	0.091852	DNM2
ENSG00000079819	grey	-0.0314545	-0.0124935	0.0424318	0.0203193	-0.0269459	0.0589227	0.415707	0.0724147	0.150315	0.148229	0.127902	0.130899	0.0878743	0.0226857	0.0953456	0.150598	0.0213029	0.152222	-0.0189402	0.115937	EPB41L2
ENSG00000079841	CD8T14	-0.0221938	-0.133772	0.0214392	-0.056843	-0.0951601	0.0863612	0.149712	0.0226636	0.113458	0.1944	0.113695	0.0670182	-0.0210573	0.0842194	0.293448	0.0530206	0.0793761	0.0182343	-0.101523	0.0322829	RIMS1
ENSG00000170889	CD8T2	0.274007	0.53119	0.0668135	0.144315	0.00641849	0.0316076	-0.0952682	-0.110354	-0.118103	0.054705	-0.124371	0.289111	0.142882	0.103895	0.00192486	-0.19498	-0.0753617	0.0888829	0.00432646	-0.0574961	RPS9
ENSG00000079974	grey	-0.025582	-0.0125029	0.104738	0.0701222	0.00719989	0.0495385	0.017176	-0.0203709	0.128717	0.101554	-0.0229273	0.0253415	0.0857347	0.0292764	0.155307	-0.00614542	-0.0352567	-0.0280372	0.0276394	0.0767072	RABL2B
ENSG00000079999	CD8T10	0.0441762	0.0380574	0.00790627	-0.0858936	-0.106711	0.0126855	0.00255988	-0.0512822	0.0161832	-0.0448963	0.0654358	0.0446486	0.0421669	-0.0160537	-0.0155112	0.0385992	0.060694	0.00967478	-0.0634676	-0.0738652	KEAP1
ENSG00000080189	grey	-0.0641381	0.00854339	0.0597788	0.00439354	-0.102055	-0.0829936	0.0438044	-0.00119329	0.0925328	0.068255	-0.0455494	-0.0114433	0.0724116	0.0255501	-0.0319265	-0.0532323	-0.124865	0.0382313	-0.0185172	0.143756	SLC35C2
ENSG00000080224	CD8T19	-0.0703556	0.0265419	0.0136374	0.122163	-0.0573352	-0.108269	0.126665	0.0692538	0.0912442	0.0816174	-0.0619796	0.0781685	-0.068117	0.0510285	-0.0906652	0.0908446	-0.076141	0.0217963	0.115233	0.174914	EPHA6
ENSG00000080298	grey	0.0311182	-0.0996755	-0.048274	-0.171023	0.051124	0.0705601	0.0504884	0.0373406	0.065123	-0.0114016	0.171054	-0.0770541	0.0295072	-0.0972602	0.00931547	0.0693553	-0.000424957	-0.0143345	0.0176152	-0.120503	RFX3
ENSG00000080345	grey	-0.0438586	0.00762191	0.0331972	0.0529312	0.0641633	0.0251873	-0.0354833	0.0238789	-0.0111679	-0.0483331	0.0559009	-0.0134822	-0.0655684	-0.0349236	-0.0343686	-0.000195702	0.000833031	-0.0142091	0.0019048	0.0291991	RIF1
ENSG00000080371	CD8T10	0.0106206	-0.0566962	-0.0330332	-0.100947	0.0899127	0.0811938	-0.0103607	-0.0421484	-0.0917039	-0.0237333	0.169322	-0.0554495	0.104165	-0.035579	0.0589312	-0.0193583	0.13339	0.0125962	-0.161624	-0.0477436	RAB21
ENSG00000080493	CD8T10	0.186133	0.0165121	-0.183369	-0.281709	0.154937	0.10561	-0.0837694	-0.220049	-0.127952	-0.0766459	0.256024	-0.148779	0.263745	-0.153957	-0.0427087	-0.0534714	0.104938	0.0420226	-0.137222	-0.157088	SLC4A4
ENSG00000080503	grey	-0.0500908	-0.0370995	0.0485495	0.07537	0.0805746	0.00369694	0.00297704	0.0741726	0.0204832	-0.0257437	0.0643807	0.0309587	-0.00860734	0.134497	0.0309735	0.0371	0.0509082	-0.0495821	-0.0531782	0.0631562	SMARCA2
ENSG00000080546	CD8T13	0.0545168	0.0843455	0.0468607	0.0496818	0.0405481	0.101301	0.0672284	0.0440276	9.71875e-05	0.0895904	0.0150832	0.0852819	-0.00285163	0.136253	0.0172815	0.0612477	0.0326677	-0.017477	0.00932867	0.0421635	SESN1
ENSG00000080561	grey	-0.0178377	-0.0557791	0.0769881	0.143807	0.0393633	-0.103072	-0.0273208	0.0484252	-0.0705667	-0.0641445	-0.0857037	0.0578403	-0.0378441	0.101748	-0.133207	-0.062635	-0.0842323	-0.035706	0.0103675	-0.0133509	MID2
ENSG00000080603	CD8T10	-0.0436024	0.00691114	0.0993798	0.00858385	0.0168703	0.103885	0.0521096	0.00731798	-0.0121274	0.117105	0.043093	0.0570276	0.10104	-0.0685351	-0.00712338	0.0486961	0.0583998	-0.0846878	0.0566589	0.0900313	SRCAP
ENSG00000080608	CD8T3	-0.00544806	0.0776186	0.179676	0.0211465	0.012191	0.0431559	-0.0295755	-0.057539	-0.0674918	0.0387877	-0.00810596	0.100781	0.0736057	-0.0273399	-0.0274857	0.0330183	-0.0566607	-0.0230398	-0.0023088	0.079748	PUM3
ENSG00000080802	CD8T16	0.0814767	-0.0119954	-0.03548	-0.060112	0.142815	0.0125385	-0.0413068	0.092713	-0.0798539	-0.142172	0.11573	-0.00142355	0.0425485	0.00599205	-0.0128916	0.0412838	0.163343	-0.0759039	0.0374749	-0.111073	CNOT4
ENSG00000080815	grey	0.0885514	0.07202	0.137234	-0.0174697	0.0431	0.144681	0.0400747	-0.0401116	0.0536464	0.0064342	0.194579	0.0952578	0.0855155	0.0224399	-0.0835531	0.137754	0.104307	0.0434274	0.0859582	-0.0187646	PSEN1
ENSG00000080819	grey	0.0205374	0.0584662	-0.0461311	-0.0510673	-0.0227415	0.02402	-0.0236525	-0.0502947	0.0730321	-0.0506043	0.0305093	0.046011	-0.112378	0.026784	0.0688967	-0.0422521	0.029663	0.0191598	-0.0865468	0.0137129	CPOX
ENSG00000122042	CD8T4	-0.164609	-0.0627446	0.0599519	0.27003	-0.0241471	-0.0841458	-0.103903	0.0886463	0.037902	-0.0566587	-0.268232	0.0262448	-0.175471	0.114529	-0.109232	-0.0228948	0.0181437	-0.0617994	0.0510121	0.0204332	UBL3
ENSG00000080824	grey	0.093228	0.0478353	-0.0852011	-0.0747031	0.0553146	-0.00483217	-0.0916045	0.0668581	0.101823	-0.0803631	0.0586797	-0.0450452	0.0336771	-0.00481064	0.0678558	0.0450674	0.0655526	0.0911025	-0.00255836	-0.168892	HSP90AA1
ENSG00000080839	grey	-0.034955	-0.115242	0.0200135	0.0137805	0.0227305	0.0145162	0.0264871	-0.0299467	0.0432948	0.0354324	-0.0152515	0.0421703	-0.0236715	0.0421815	0.0170166	-0.0361414	0.00527959	-0.00894186	-0.0293571	0.0472578	RBL1
ENSG00000080845	grey	-0.0350748	0.0144235	0.0697389	0.0887241	-0.0844065	-0.0505935	0.0970106	0.0564482	0.0132302	0.13123	-0.097074	-0.0708195	0.0429271	0.02877	0.0330228	-0.019874	-0.0566149	-0.00227414	0.0446345	0.0684781	DLGAP4
ENSG00000080854	grey	-0.0520586	-0.0258841	0.0289569	-0.0683043	-0.0230838	0.0303741	0.0506102	-0.0214614	-0.0178669	0.00820605	0.0816431	-0.107097	0.0896221	0.0118169	0.0200395	0.0217582	-0.0422546	-0.0217398	-0.0303395	-0.00557171	IGSF9B
ENSG00000080986	grey	0.148809	0.0740064	-0.0454672	-0.0903539	0.00860644	0.0245919	0.0482864	-0.0905897	-0.0888671	0.0173091	0.087829	0.0765611	0.0565279	0.0199996	-0.0607937	-0.0154837	0.0468635	-0.00121018	0.00480019	0.0323928	NDC80
ENSG00000081014	grey	0.0207589	0.13751	0.00400389	0.0398158	0.00996144	0.0227378	-0.000214785	0.0590335	-0.131161	-0.00825587	0.000582631	-0.0140387	0.0411184	0.00390779	-0.0511833	0.110648	0.0485339	-0.131324	0.0102989	-0.0148749	AP4E1
ENSG00000081019	grey	-0.000514124	0.000177247	0.106347	-0.0217099	-0.0383649	0.122814	0.0507217	0.0431857	0.205277	0.0935877	0.0519711	0.0950548	-0.00637309	0.0608553	0.140349	0.0566942	0.103438	0.00403816	-0.022327	0.119124	RSBN1
ENSG00000057657	CD8T4	-0.056423	0.113163	0.110729	0.269947	0.059877	-0.146033	-0.0922623	0.0318251	-0.0187774	-0.103863	-0.255816	0.0654635	-0.0404495	0.0552632	-0.187856	-0.0781607	-0.215952	-0.0184384	0.191418	0.0694316	PRDM1
ENSG00000081059	CD8T13	-0.0119107	-0.0033505	-0.00954909	0.104024	-0.0724339	-0.174229	-0.0404507	0.138695	0.117097	0.0753973	-0.0541477	0.0976803	-0.0812592	0.0741526	0.0637264	0.00880755	-0.0171996	0.20969	0.0283253	0.0146423	TCF7
ENSG00000081087	grey	-0.0402308	-0.0273376	0.00645139	-0.0256027	0.00829949	-0.0504929	0.129147	0.0646128	0.0956676	0.0937139	0.0915531	0.0761679	0.0017169	0.0558635	0.182625	0.0990204	0.0897144	0.038615	0.00958817	0.0861128	OSTM1
ENSG00000081148	grey	0.113352	-0.0870974	-0.0395	0.0470638	0.0386101	0.0725331	-0.00319227	0.101348	-0.0162285	-0.102525	0.0959517	-0.0451575	-0.0481234	0.0378522	-0.0355918	0.0408803	0.108022	0.0686099	0.0849282	0.0203128	IMPG2
ENSG00000081154	CD8T1	0.0410721	0.0155573	0.090023	0.0701099	-0.0666443	0.0767425	0.063936	-0.0373362	-0.103225	0.122448	0.021914	0.0736621	0.0087069	0.00120854	-0.0444617	0.0348327	0.143847	-0.0777955	-0.10351	0.00589002	PCNP
ENSG00000081177	CD8T13	-0.120004	-0.0122814	-0.0709216	0.133384	-0.0872918	-0.107216	-0.056125	0.0798452	0.0471937	0.00695413	-0.122819	-0.0947424	-0.0661657	0.00906001	-0.00891961	-0.0107398	-0.0726336	0.104556	-0.11552	-0.0318508	EXD2
ENSG00000081189	grey	-0.0615165	-0.0626064	0.0351083	-0.0465694	0.0294258	0.0249061	0.371339	0.0904896	0.122075	0.215744	0.124644	0.0571646	0.0249412	0.0972726	0.181382	0.109408	0.014902	0.214372	-0.0347272	0.113904	MEF2C
ENSG00000081237	CD8T5	0.215363	0.0774615	-0.258215	-0.0540725	0.504319	0.107396	-0.1743	-0.17503	-0.167324	-0.15582	0.0914082	-0.0845182	0.15976	-0.112394	-0.144963	-0.0936232	-0.00117482	0.0921125	0.212031	-0.127812	PTPRC
ENSG00000081307	CD8T5	0.0321521	0.00238669	0.00571796	-0.0255207	0.172542	0.156764	0.0791242	0.00599057	-0.105143	0.0977448	0.184531	0.0855816	0.11793	-0.000827153	0.0876604	0.0666231	0.130239	-0.0730628	0.129056	-0.017794	UBA5
ENSG00000081320	grey	0.0264655	0.0892734	0.0629805	0.186263	0.0938146	-0.0192503	-0.0418009	0.0328917	-0.0414601	-0.0192548	-0.0954155	0.0411367	0.049578	0.0763529	-0.0422804	-0.0101003	-0.0241623	-0.0213839	0.166079	0.074835	STK17B
ENSG00000081377	CD8T16	0.0499912	-0.0382662	-0.00567494	-0.0381931	-0.137616	0.0555343	0.0613235	-0.0255369	-0.0318508	0.0882718	0.023572	0.00736917	-0.0779389	0.0556051	0.0112758	-0.0307242	0.175677	0.0033985	-0.123764	-0.0261104	CDC14B
ENSG00000081386	CD8T5	0.0408475	-0.00627242	-0.0764	0.00489914	0.080799	0.0787282	-0.0440349	-0.0382961	-0.181046	-0.0847379	-0.0503377	-0.0205996	0.00115275	-0.089416	-0.0751747	-0.053627	-0.109187	-0.0130119	0.027337	-0.0438673	ZNF510
ENSG00000081665	grey	-0.015735	0.0191229	0.0683231	0.0989434	0.0562417	-0.0497498	-0.0635664	0.105827	-0.0581299	-0.0734535	0.0184499	-0.0430315	0.125871	0.00335098	-0.0509541	0.0851137	-0.0177938	0.0497945	0.0549497	0.000444503	ZNF506
ENSG00000081721	grey	-0.0215821	-0.0213128	0.0220012	-0.0195912	0.0981902	-0.0253704	0.0579372	0.0883949	0.153081	-0.0040211	0.044364	-0.0087942	0.0731675	0.0265646	0.195219	0.126282	-0.00167828	0.202847	0.108844	-0.0382549	DUSP12
ENSG00000081760	CD8T19	-0.0778566	-0.0657951	0.127543	0.107608	-0.0610282	0.0089806	0.0115961	0.0797765	0.131445	-0.0407774	0.0065166	0.0519013	-0.0287877	-0.0117007	-0.10638	0.0242381	0.0278613	-0.0800564	-0.0359903	0.173521	AACS
ENSG00000149294	CD8T4	-0.11581	-0.0198609	0.0993339	0.267183	-0.157377	0.0443453	0.0943443	0.115538	0.147646	0.135509	-0.163566	0.13432	-0.140311	0.164476	-0.00393516	0.105179	0.0137366	0.00779257	0.0969798	0.265928	NCAM1
ENSG00000081803	CD8T6	0.0302763	-0.0529823	0.0409682	-0.107551	0.0223608	0.15228	0.149062	-0.0703641	-0.0657326	0.231557	0.0626688	0.0476377	0.00856237	-0.00571724	0.134513	-0.0238742	0.0261254	-0.00534728	-0.0372745	0.026183	CADPS2
ENSG00000081870	CD8T9	-0.0633632	-0.0451129	0.0928934	0.0629805	-0.0204029	-0.0251455	0.0279592	0.0556781	0.0691867	0.115533	0.014117	0.0310445	0.0107633	0.068654	0.151326	0.0846029	0.0127464	0.0146718	0.070774	0.0281563	HSPB11
ENSG00000081913	grey	0.0563317	0.0645524	0.0176796	0.133755	-0.037817	-0.114655	0.00719438	0.0412811	-0.031021	0.0307949	-0.154043	-0.027199	-0.119251	0.0856189	-0.133194	-0.0476089	0.0770104	0.0973628	0.0460658	0.0319322	PHLPP1
ENSG00000081923	grey	0.0894786	0.0249053	0.0100534	0.0273185	0.0687355	0.0634462	0.0854786	0.0336832	0.00810912	0.13113	0.00910222	0.0583523	0.106465	0.111994	0.0524144	-0.115727	0.0385905	0.0668212	0.0190676	0.0663675	ATP8B1
ENSG00000081985	grey	-0.0444827	0.0402634	0.0714409	0.240773	0.0716981	0.00417754	-0.0434162	0.102916	0.0278479	0.0232632	-0.140036	-0.000893103	0.00679824	-0.0699277	-0.154275	0.0964094	-0.0639345	0.0277209	0.240335	0.144411	IL12RB2
ENSG00000082014	CD8T13	-0.0379836	-0.0281637	0.0812283	0.123566	-0.0729201	0.00488169	0.0366626	0.00800695	-0.0283347	0.142205	-0.0498017	0.106023	-0.0220598	0.099022	0.0358767	0.0478865	-0.0196269	0.083906	0.0187316	0.0712561	SMARCD3
ENSG00000082068	grey	-0.0226917	-0.0403435	0.0219117	0.0518231	0.0271714	-0.0500856	0.0531657	0.0409316	-0.153601	-0.00357022	-0.0151774	-0.0184201	-0.0174241	0.00370135	-0.0541693	-0.0199626	0.00532254	0.0363205	-0.0484261	0.00468694	WDR70
ENSG00000082074	CD8T15	0.053913	-0.0185428	0.026982	-0.104594	-0.047304	0.0971491	0.0302469	0.0408239	-0.071676	-0.00870444	0.157461	0.0265255	-0.0701266	0.00751801	0.0292899	0.135142	0.160284	-0.0976216	0.0143636	-0.0853424	FYB1
ENSG00000188846	CD8T2	0.342698	0.526912	-0.0683966	0.0639365	0.0368168	0.0282474	-0.037296	-0.0340348	-0.0194961	0.0484172	-0.0914745	0.128513	0.0847835	0.050973	0.0150151	-0.193917	-0.0654641	0.194065	0.0572914	-0.0612923	RPL14
ENSG00000082153	CD8T12	0.0548937	0.0410611	-0.0513457	-0.0745926	0.0293304	-0.0262836	-0.0673612	-0.0464749	-0.0637801	0.0272984	0.0654668	0.0101332	0.0966361	-0.0648634	-0.0113521	-0.0583339	0.0127361	0.0838976	-0.0214834	-0.0623973	BZW1
ENSG00000082212	grey	0.00786027	-0.0612198	0.150307	-0.0774623	-0.133627	0.0935374	0.00551147	0.0293029	0.0320376	0.12075	0.103024	0.1495	0.0515856	0.0363632	0.167405	0.129688	0.0824217	-0.0137861	-0.0439071	0.0839496	ME2
ENSG00000082213	grey	0.114482	0.00545401	-0.0606263	-0.0830348	-0.0532211	0.00537319	0.0481064	-0.00693865	0.076828	-0.08996	0.0915694	0.0259787	0.0776138	-0.0513253	0.0158028	0.0101182	-0.047655	0.171075	0.0620087	0.0108206	C5orf22
ENSG00000082258	grey	0.059834	0.0712461	0.0544266	0.167538	0.0216431	0.0777313	-0.0130437	0.101884	0.0338729	0.118752	-0.005779	0.0794517	0.0109105	0.0425331	-0.00401691	0.0030177	-0.00121628	0.125559	-0.00324665	0.082936	CCNT2
ENSG00000082269	grey	0.109153	0.150566	0.169407	0.054046	0.0229613	0.137042	0.275992	0.0397414	0.0328166	0.222532	0.0330854	0.27193	0.100659	0.147465	0.197306	-0.000710815	0.0876504	-0.0294812	0.07159	0.171586	FAM135A
ENSG00000082397	grey	-0.121224	-0.104052	0.118123	0.0665955	-0.0481496	0.0149815	0.244094	0.101537	0.18584	0.266797	-0.051801	0.0947765	-0.0405426	0.0737695	0.0193151	0.122543	-0.0252706	-0.00146744	-0.0355834	0.19776	EPB41L3
ENSG00000082458	grey	0.0102638	-0.0337214	0.02587	-0.0292183	0.00399862	0.0512186	-0.029695	-0.00525349	0.0523358	-0.0788533	0.0869932	0.0928609	-0.0282797	-0.0663977	-0.086839	0.101987	0.0302249	0.0359322	0.0896034	0.0119161	DLG3
ENSG00000082512	CD8T6	0.0840794	0.0109998	0.0333889	-0.069335	-0.0393388	0.109092	-0.0305374	0.0382082	-0.0151675	-0.0264523	0.0440518	0.124438	0.0162322	0.0673619	0.113335	0.0533397	0.140988	-0.0274614	-0.0360455	0.0294662	TRAF5
ENSG00000082515	grey	-0.0513468	-0.0892234	0.0478247	-0.0376131	-0.025645	-0.0296649	-0.00773366	0.00522027	-0.00960731	0.0406597	-0.0357637	-0.0351501	-0.0531494	0.0455546	0.0320341	0.00454256	-0.0395831	-0.00328448	0.0123001	-0.109894	MRPL22
ENSG00000082516	CD8T13	0.0779512	0.0325987	0.0447863	-0.000967896	-0.0256185	-0.00915825	0.0617176	-0.0755058	-0.0117211	0.107594	0.00881508	-0.00228937	0.027124	0.0654974	-0.00761509	-0.068858	0.0307997	0.0807761	-0.0648266	0.018466	GEMIN5
ENSG00000108518	CD8T2	0.40088	0.51978	-0.0993604	-0.0267694	-0.0197353	0.119057	-0.0340318	-0.0972967	-0.0592041	-0.0688798	-0.0211205	0.236394	0.188492	0.0760994	0.033846	-0.0922929	0.0882109	0.155967	-0.0586863	-0.0976921	PFN1
ENSG00000082701	CD8T10	0.00712137	-0.140332	-0.0546789	-0.0860447	0.0325167	0.0511222	-0.00020907	0.121778	0.048795	-0.00374898	0.187982	-0.16377	-0.0029349	-0.0618838	0.0225946	0.130155	0.0796341	-0.0100166	-0.0230453	-0.00809036	GSK3B
ENSG00000082805	CD8T10	-0.00838627	0.0177867	0.0213621	0.0346573	0.105028	0.18084	0.131019	0.0489135	0.0666911	-0.0306048	0.0637728	0.0647515	0.139548	0.027827	0.0527306	0.0518482	0.149772	0.0266276	0.0411122	0.0437603	ERC1
ENSG00000082898	CD8T15	-0.08547	-0.0902293	-0.0403065	-0.0164079	0.0626873	-0.0665431	-0.00190499	0.0965755	-0.0742945	-0.0162706	0.0640259	-0.00267549	-0.126225	-0.062459	-0.00833878	0.0702323	-0.0261098	-0.00230086	0.0872907	-0.011129	XPO1
ENSG00000082996	grey	-0.046883	-0.097224	0.00940974	-0.0501275	0.0215212	0.12931	0.0539449	-0.0422881	0.0236014	0.0326551	0.0977865	0.000195671	0.054153	-0.108443	0.0120612	0.141389	0.0322335	-0.0687392	0.0252477	0.00382344	RNF13
ENSG00000083067	grey	-0.0153545	-0.00935722	-0.0359366	-0.044609	0.0432731	0.0369944	0.16108	0.0674954	0.0811446	0.0930705	0.044845	0.0469429	-0.0159324	0.0475851	0.0660964	0.0905465	0.151576	0.0810286	-0.102225	0.0847407	TRPM3
ENSG00000083093	grey	-0.0729466	-0.0585663	0.114735	0.0979531	-0.124938	-0.0840527	0.0616432	0.0338702	0.135626	0.0460611	-0.045819	-0.0781316	0.0496149	-0.0165125	-0.0199622	0.0787538	-0.0679778	0.0889532	-0.00493785	0.119127	PALB2
ENSG00000083097	CD8T11	-0.0848325	-0.0857308	0.130155	0.11917	-0.0666857	-0.0502383	0.0828522	0.0872208	0.0313722	0.0748196	-0.0383364	0.20107	-0.059333	0.185029	0.117983	0.104843	0.0371196	-0.0166889	-0.0526184	0.140531	DOP1A
ENSG00000083099	grey	-0.0503291	0.0119935	0.0788327	0.00838813	-0.132833	-0.0573233	0.00463769	-0.0430842	0.127436	0.124179	0.0114708	0.0640728	-0.00371818	0.0559176	0.110622	-0.0420211	0.0648728	0.1396	-0.0859593	-0.0525764	LYRM2
ENSG00000083123	grey	0.0694597	0.036397	0.0403154	0.0930206	0.0867989	-0.0148818	-0.0471165	0.0252796	0.042362	-0.0308173	-0.0681642	-0.0694395	0.0846716	0.0703754	-0.116212	-0.057518	0.0492374	0.0400788	0.0112502	0.0020413	BCKDHB
ENSG00000083168	grey	-0.0273481	-0.0349062	-0.0288398	0.0262066	0.101764	0.0215239	-0.120269	0.00101579	-0.0301283	-0.0222732	-0.00521823	-0.0399727	0.0357082	0.000905079	-0.0430002	-0.0580384	0.0286074	0.00443359	0.0418075	-0.00810273	KAT6A
ENSG00000083223	grey	-0.0408716	0.0300425	0.0391603	0.0333704	-0.0239373	0.0833393	0.0193996	-0.0345436	-0.0286255	0.0883446	-0.0489917	0.115137	0.0540177	0.0485271	-0.00236988	-0.0152741	0.0220476	0.0136221	-0.0497473	-0.0607259	TUT7
ENSG00000083290	grey	0.0382449	0.0503771	-0.125141	-0.0284584	0.0209703	0.0258193	0.0198116	-0.0736419	-0.0104699	0.055379	-0.0188711	-0.0134495	0.0465873	-0.0220658	-0.0198946	-0.0706467	0.0364251	0.0853925	0.0301404	-0.065097	ULK2
ENSG00000154822	CD8T4	-0.131911	-0.0234463	0.0388941	0.267138	-0.125019	-0.0907553	-0.00412455	0.0517586	0.0234674	0.0585661	-0.181373	0.107394	-0.0616395	-0.00809213	-0.123554	0.0298409	-0.0957747	-0.0183656	0.0119817	0.108041	PLCL2
ENSG00000083444	grey	0.046137	0.165322	0.0497113	0.0683435	-0.0691314	-0.0486919	0.0132423	0.0902846	0.0575836	-0.0126678	-0.0826714	0.0453174	-0.117503	0.0307384	-0.0755435	0.076934	0.0022534	0.106194	0.0689206	0.000351029	PLOD1
ENSG00000198727	CD8T2	0.301583	0.517279	0.00561658	0.00248106	-0.00161867	0.103173	-0.0808813	-0.165516	-0.0191179	0.0253173	-0.058084	0.267854	0.036246	0.103399	0.0929312	-0.0896162	0.135238	0.0938379	-0.000749008	-0.0071273	CYTB
ENSG00000000971	CD8T4	0.0709857	0.0906955	0.0599544	0.265638	-0.0581598	-0.0991731	0.0592004	0.10625	0.00160484	-0.113436	-0.167626	0.0881024	-0.111273	0.00687577	-0.190474	-0.00715847	-0.0153894	0.0244168	0.202689	0.239957	CFH
ENSG00000083520	grey	0.07156	0.0982569	0.0667118	0.0310852	-0.0270779	0.0523415	0.007853	0.0631598	-0.0875733	0.0321389	-0.00209258	0.0404724	-0.0330994	-0.0231193	-0.0284416	0.00632764	0.0721629	-0.0538948	0.0964875	-0.0414775	DIS3
ENSG00000083535	CD8T10	0.0615132	-0.0201689	-0.0240581	-0.0903168	0.0534803	0.107129	0.0834682	-0.0683277	0.114111	0.0460358	0.132009	0.00475087	0.122305	0.05379	0.105538	-0.0819678	0.223735	-0.0217498	-0.137251	0.017282	PIBF1
ENSG00000083544	grey	-0.0247424	-0.10738	0.090741	0.0156167	-0.0106918	0.044497	-0.110992	0.0234647	0.000758113	0.0254025	0.0355208	-0.0637607	-0.0171894	-0.0168579	0.00489859	0.0563336	0.0486559	-0.0411062	-0.0565284	-0.0224517	TDRD3
ENSG00000083635	grey	0.0799867	-0.0164585	0.0690533	0.028248	0.0338797	0.0216913	-0.0632691	-0.0157873	-0.0470762	-0.0198847	-0.0455165	0.0729865	-0.0579626	0.086551	-0.00422123	0.050559	0.0482306	-0.00739639	0.104594	-0.00608008	NUFIP1
ENSG00000113269	CD8T4	-0.167636	-0.125483	0.10044	0.261557	-0.118335	-0.15918	0.131101	0.121721	0.0188853	0.0768463	-0.0962545	0.00930087	-0.0931235	0.0867346	-0.0151861	0.0408951	-0.0168412	-0.00252022	0.0553544	0.118836	RNF130
ENSG00000083720	grey	-0.0622792	-0.0862447	-0.0163834	0.0259993	-0.0330336	0.0675479	-0.0024383	0.0407001	-0.0986947	-0.0175949	-0.0146242	-0.00146777	0.0175652	-0.00572459	-0.0144876	0.0225921	-0.00470311	-0.135128	-0.00152131	-0.00600098	OXCT1
ENSG00000083750	CD8T1	0.146759	0.0216725	-0.0918347	-0.171592	0.0544774	0.112761	-0.0812173	-0.101338	-0.125396	-0.0907674	0.149536	0.0539931	0.115228	-0.0447685	0.0226257	-0.0992543	0.0590417	0.0365203	-0.0224885	-0.15316	RRAGB
ENSG00000083799	grey	-0.0860945	-0.0010679	0.115415	0.0718752	0.0416456	-0.0834095	-0.0452612	0.104249	-0.0452426	-0.034128	0.0271964	0.00116023	-0.0665441	-0.0688113	-0.0310865	0.0878019	-0.101854	-0.0277062	0.189187	0.0659272	CYLD
ENSG00000124570	CD8T4	-0.192231	-0.0943381	0.1064	0.261551	-0.0796935	-0.225474	0.02931	0.254792	0.0552159	0.00498646	-0.148553	-0.0710439	-0.155156	0.0665271	-0.103392	0.116197	-0.13736	0.0811374	0.114246	0.0225671	SERPINB6
ENSG00000135299	CD8T4	-0.185749	-0.136734	0.0111346	0.259146	0.00778778	-0.126277	0.148368	0.192954	-0.0107228	0.0326829	-0.169343	0.0739645	-0.160832	0.0215707	-0.117593	0.133508	-0.105832	0.0278378	0.097615	0.131587	ANKRD6
ENSG00000083844	CD8T19	-0.0554415	0.0362878	0.193494	0.138641	-0.164248	-0.0183693	-0.0151696	0.125674	0.120544	0.106977	-0.0968155	0.0823266	-0.100557	0.137568	-0.0609844	0.139092	-0.0570566	-0.013683	-0.0478657	0.188954	ZNF264
ENSG00000122406	CD8T2	0.389034	0.516075	-0.00200031	0.019612	0.030217	0.0969438	-0.0279182	-0.0139716	-0.0149432	0.105434	0.030119	0.170616	0.281765	0.0992388	-0.0593921	-0.155919	0.0154204	0.193106	0.0544317	-0.0824388	RPL5
ENSG00000083896	grey	-0.00402839	-0.00740839	-0.0397322	0.0611003	-0.00951223	0.00918703	0.0187197	0.0570341	0.0352677	0.0243582	0.0170088	-0.0112134	0.0535298	0.083655	0.000631963	0.0409114	0.0881907	-0.0399343	0.0102179	0.0854603	YTHDC1
ENSG00000083937	CD8T1	0.153325	0.0949053	-0.0934656	0.0273894	-0.0807872	-0.0383709	-0.00299732	-0.0919446	-0.0929932	0.0270924	-0.0408439	0.0451243	0.0426035	0.0291042	-0.0379675	-0.174785	0.0329378	-0.0224719	-0.0132967	-0.0644829	CHMP2B
ENSG00000229153	CD8T4	-0.121499	-0.0329092	0.145921	0.258513	-0.131045	-0.0829262	-0.070023	0.106725	0.0566568	0.0993059	-0.197254	0.104369	-0.110011	0.0707307	-0.00934526	-0.0553717	-0.0943979	-0.0361235	-0.00778892	0.0265594	EPHA1-AS1
ENSG00000084072	CD8T11	-0.0546251	0.0634374	0.0388958	0.0356908	-0.0137174	-0.0718593	-0.0529803	-0.0783227	-0.0874219	-0.0844208	-0.0992849	0.120539	-0.00133925	0.0154754	-0.0329169	-0.0294714	-0.0760204	-0.114346	0.022678	0.00458497	PPIE
ENSG00000084073	grey	0.0660693	0.0800955	0.00857024	0.0547849	-0.0482433	0.0148123	0.0970483	0.000641522	-0.0757264	0.0280286	0.0763626	0.0471585	0.0692102	0.149486	0.00564264	-0.00590444	0.111479	0.0434681	-0.0588228	-0.012796	ZMPSTE24
ENSG00000084090	CD8T16	0.197469	0.165646	0.0530195	-0.0755518	0.0625599	0.145549	0.0578577	-0.00445721	0.0210378	0.0186909	0.140971	0.112591	0.0655949	0.0927727	0.148913	0.0232493	0.211821	0.0665991	-0.0202848	-0.105441	STARD7
ENSG00000084092	grey	0.0399148	0.0544647	0.0617749	0.0568462	-0.0195108	-0.0318048	0.0129572	0.0947578	0.149059	0.0127839	-0.061876	0.0385233	-0.0581064	0.10806	-0.0293143	0.0185045	0.0664628	-0.00349888	0.0311984	0.0877541	NOA1
ENSG00000084093	grey	0.144648	0.0911662	0.0111926	-0.0931156	0.0106815	0.0353967	-0.018535	-0.00781244	0.00152713	-0.0665321	0.144969	0.00946107	0.108267	-0.0475223	0.0114111	-0.0784538	-0.0343036	0.0259969	-0.0277456	-0.0980914	REST
ENSG00000084112	CD8T7	-0.0160227	-0.0340663	-0.00724615	0.00431436	0.0168633	0.0943486	0.155562	0.0512437	0.0326103	0.0722508	0.050179	0.0131549	0.0115528	-0.0378358	0.0606834	0.146957	0.0418593	0.0261519	0.00397693	0.153224	SSH1
ENSG00000084207	CD8T6	0.173571	0.173815	0.0180241	-0.0478137	-0.0462597	0.165461	-0.0217399	-0.0770532	-0.0938368	-0.00532658	0.0168635	0.0289778	-0.00528124	-0.0389013	-0.0216801	-0.0460463	0.110568	-0.0365652	-0.10655	-0.0689701	GSTP1
ENSG00000084234	CD8T14	-0.0328331	0.0171396	0.0714953	-0.0201858	-0.0294769	0.0946796	0.0602069	0.0473281	0.081318	0.0845974	0.052015	0.0303684	0.0592657	-0.0129357	0.0261597	0.132198	0.134888	-0.0149267	0.0125232	-0.0274933	APLP2
ENSG00000084444	CD8T12	0.151059	0.13553	-0.0776984	-0.0838721	0.19246	0.122007	-0.0795795	-0.0969028	-0.124673	-0.0578224	0.0152365	-0.148218	0.207574	-0.121049	-0.0537978	-0.0936301	-0.0578104	0.00748557	0.00278594	-0.0815998	FAM234B
ENSG00000084463	CD8T13	0.126567	0.119522	-0.0959029	-0.072279	0.0366566	-0.128668	-0.0680513	-0.097121	-0.0311807	0.0242356	0.0316768	0.0558441	0.0216452	0.159804	0.121927	-0.222509	0.0375885	0.0928604	-0.0940543	-0.115192	WBP11
ENSG00000084623	CD8T1	0.119336	0.138447	-0.036699	0.0550963	-0.0407732	0.00842261	-0.107185	-0.140941	-0.0886395	0.0265814	-0.0730312	0.0551536	0.0298184	0.0303615	-0.0125508	-0.110255	-0.0608518	0.0505219	-0.0945373	-0.0466085	EIF3I
ENSG00000084652	CD8T10	0.0202722	0.0610503	-0.0230163	-0.206613	0.0147635	0.0475233	0.00103206	-0.0888957	0.0143959	0.0723853	0.113236	-0.0419966	0.0345345	-0.010959	0.119229	-0.0172225	-0.00141188	0.00999814	-0.16823	-0.0854034	TXLNA
ENSG00000084676	grey	0.0393583	0.0554831	0.0759469	-0.0408919	0.000999603	0.0388032	-0.0303017	0.0433593	-0.0242566	-0.0859377	0.0687223	0.0923712	-0.0343304	0.0314538	0.0923041	0.109906	0.0643341	-0.0305118	0.0340378	-0.0385213	NCOA1
ENSG00000084710	CD8T14	-0.0516472	-0.0921879	0.232191	-0.0865876	-0.139556	0.0165976	0.0291072	0.0855432	0.235282	0.115451	0.0628914	0.125455	-0.0309646	0.0441465	0.188843	0.128255	0.0520705	0.0404314	-0.113897	0.0340288	EFR3B
ENSG00000084731	grey	0.0880526	0.0573031	0.00661325	-0.0193879	-0.0119204	0.000186438	0.00974302	-0.0769833	-0.0164885	0.0874379	0.0321057	-0.0295399	0.0388752	0.0473518	0.0197884	-0.0732873	0.0400077	0.116236	-0.0657564	-0.0358779	KIF3C
ENSG00000184005	CD8T4	-0.215507	-0.0715247	0.12324	0.257678	-0.0536422	-0.0669532	0.118977	0.157889	0.042336	0.130323	-0.197397	0.0383249	-0.202643	0.127113	-0.0469441	0.0820198	-0.12358	0.0133992	0.159555	0.0749931	ST6GALNAC3
ENSG00000084754	grey	-0.0238582	0.032126	0.0586356	0.0612654	0.0595906	0.0696084	0.168032	0.050967	-0.0124333	0.0380046	0.0706173	0.0690719	0.0956457	0.118136	0.0210849	0.0899436	0.0559993	0.00940124	0.110655	0.00569248	HADHA
ENSG00000130038	CD8T4	-0.14781	-0.0694317	0.242476	0.257292	-0.225037	-0.0422923	0.0671252	0.197081	0.174526	0.151624	-0.120759	0.028862	-0.131428	0.136592	-0.000351846	0.162751	0.0437348	0.0645038	-0.0385237	0.194002	CRACR2A
ENSG00000084774	grey	0.0246945	0.17975	0.00717124	0.00870077	0.0234831	0.0171685	0.00842108	0.0342692	0.110325	-0.00761858	0.036885	-0.0418906	0.105413	0.00326885	0.0458044	0.0667116	-0.028999	0.0432237	-0.0675377	0.0564724	CAD
ENSG00000204525	CD8T2	0.385906	0.514273	-0.13004	-0.152919	0.106108	0.0562259	-0.068656	-0.175892	-0.0898015	-0.0564325	0.0843454	0.14354	0.183876	-0.0089157	-0.0203306	-0.235309	-0.0286849	0.144179	0.000377928	-0.164328	HLA-C
ENSG00000085117	grey	0.0688194	0.142309	0.027913	0.0518764	-0.180712	-0.0126651	-0.0173438	0.0191718	0.0681489	0.000513161	-0.0371216	0.0850509	0.0347152	0.0319986	0.0390673	-0.0318549	0.0536999	0.0496524	0.000255381	-0.000257451	CD82
ENSG00000085185	CD8T16	0.0292672	-0.0772886	0.0792416	0.0222369	-0.00610342	0.0865598	-0.00866585	0.0333906	-0.0213282	-0.0712957	0.0110844	0.00932781	-0.0892359	0.0145733	-0.00597494	0.0949622	0.175999	-0.126663	0.0643304	-0.0505298	BCORL1
ENSG00000085224	CD8T1	0.151435	0.00413273	-0.0301478	-0.0191933	0.113432	0.0846984	-0.0285892	0.0559983	-0.036637	-0.054936	0.128845	0.0230669	0.0503825	0.0852562	0.111243	0.0396756	0.0781344	0.0174007	-0.00250097	-0.0324168	ATRX
ENSG00000085231	grey	0.0479828	0.0050206	-0.0160484	0.0135969	0.0475294	0.0080885	-0.0249822	-0.0478415	-0.057992	0.0673312	0.0995228	-0.128261	0.141552	-0.0100768	-0.0874053	-0.133997	0.0232839	-0.0140024	-0.0686002	-0.111532	AK6
ENSG00000085274	grey	0.000927647	0.140643	-0.022684	0.0666065	-0.0260682	0.0089951	-0.0992452	-0.089123	0.0217727	0.0349962	-0.113925	0.158808	0.000586742	0.0308619	-0.0511518	-0.138943	0.00790507	0.00945744	0.0454558	0.0378964	MYNN
ENSG00000085365	grey	0.032285	-0.030087	-0.0687944	0.0883183	-0.0281912	-0.0442662	-0.0132162	0.0629043	0.0184796	-0.10507	-0.0461712	-0.0867125	-0.00582564	0.0176125	0.00258199	0.0200474	-0.00999702	-0.018673	0.01929	-0.0176181	SCAMP1
ENSG00000085377	CD8T6	0.0233086	-0.0619403	-0.0806931	-0.101987	-0.0110569	0.129087	-0.0885523	-0.10751	-0.170595	-0.0647716	0.0444521	-0.137774	0.0619364	-0.0941868	-0.130662	-0.168142	-0.0332055	-0.110532	-0.0637292	-0.122604	PREP
ENSG00000085382	grey	-0.103663	0.0227659	0.0941789	0.00545443	-0.0216229	0.0713011	0.0179234	0.00386733	-0.00753286	0.0137712	-0.0122452	0.107758	0.0820771	-0.0646635	0.033417	0.0547914	0.0180068	-0.0583232	-0.0857589	0.0276235	HACE1
ENSG00000085415	grey	-0.00677248	0.0651333	-0.0257378	-0.00768366	0.00136904	0.0453899	-0.0441453	-0.103505	-0.114758	0.0580564	-0.0567454	-0.0161057	-0.006161	-0.0197446	0.0420118	-0.0795459	0.0335146	-0.0717322	-0.0360757	-0.120489	SEH1L
ENSG00000085433	grey	-0.0839469	-0.0791785	-0.0280043	0.000641324	0.0748568	-0.0184346	0.0533795	-0.0340857	-0.0110287	-0.054828	-0.0318435	-0.145298	0.0232276	-0.0944997	0.0433434	-0.0224344	-0.10541	-0.0265349	-0.00149644	-0.0760471	WDR47
ENSG00000085449	CD8T6	0.0121832	0.0517956	0.0142859	-0.0536431	-0.00295503	0.145996	0.0517906	-0.0938035	-0.079578	0.145384	0.0628646	0.129225	0.114161	-0.0913223	0.0943651	-0.0343853	0.0684117	-0.159152	-0.117127	0.113186	WDFY1
ENSG00000085491	CD8T14	0.0474712	-0.0335431	0.0727544	-0.0249201	-0.0981549	0.0105306	0.019432	0.0105997	0.133175	0.040797	0.0745376	0.0312534	-0.0382289	0.059681	0.227064	-0.010554	-0.0304026	0.0978348	-0.0630915	0.0628948	SLC25A24
ENSG00000085511	CD8T13	0.0799694	0.0113928	0.0249551	0.0616943	0.0217899	-0.00382301	-0.0984354	0.0395275	0.0417593	-0.115512	0.00325605	0.0705149	0.0482673	0.202955	0.017124	0.0305864	0.103382	0.0316833	-0.0850566	-0.0592668	MAP3K4
ENSG00000085514	CD8T13	0.00984405	-0.0274183	0.16255	0.0929112	-0.0452992	0.0673843	0.0408625	0.0403173	0.0504757	0.0699929	-0.017332	0.0754027	-0.024899	0.160642	-0.0165149	0.0813547	0.0742433	-0.033766	-0.0241013	0.0362896	PILRA
ENSG00000163297	CD8T4	-0.0307385	0.149076	0.174398	0.257283	-0.206794	0.017921	-0.00464945	-0.0364211	0.0380517	0.0958697	-0.194862	0.194765	-0.049374	0.205824	-0.105701	0.00118656	-0.017511	-0.162162	0.0367278	0.168459	ANTXR2
ENSG00000085662	grey	-0.0521897	0.0460864	0.0111339	0.09117	-0.00888518	-0.0186848	0.0282657	0.00850741	0.0646969	-0.0278945	-0.0877718	0.0833219	-0.0114966	0.0691761	-0.0846169	0.0398679	0.0826925	0.00127638	-0.0100061	0.0482388	AKR1B1
ENSG00000085719	grey	-0.0608059	-0.0338335	-0.00965689	-0.0921413	0.105514	0.0395978	0.00210539	-0.0362629	-0.0457983	-0.0754504	0.0798543	-0.0519447	0.0654615	-0.0670372	-0.0215399	0.0327178	0.0162218	-0.0206624	0.030982	-0.00798684	CPNE3
ENSG00000085721	grey	0.124723	0.133118	0.0053769	-0.00522168	0.0286971	0.0369819	-0.0528174	-0.0551515	-0.0102021	-0.0593062	0.00656282	0.0770103	-0.0363198	0.0750129	-0.0506381	-0.0304529	0.0371188	0.0913758	0.0276426	-0.0773403	RRN3
ENSG00000085733	CD8T3	-0.114144	-0.0419956	0.208436	-0.0379989	-0.168636	-0.00709329	0.0980507	0.0688643	0.138309	0.168846	-0.0053521	0.0984929	-0.096702	0.0492164	-0.0227492	0.0863767	-0.0135243	-0.000504878	-0.0313897	0.114739	CTTN
ENSG00000085760	grey	0.103258	0.134753	-0.0980113	0.0621403	-0.0122675	0.0447409	-0.0675692	-0.0156717	-0.00452875	-0.0237418	-0.0266708	0.149497	-0.0790587	0.0794414	-0.0279724	-0.0305753	0.105997	0.0521541	0.0784748	-0.0149409	MTIF2
ENSG00000085788	grey	0.118942	0.0821634	0.0397269	-0.0325481	0.0694703	0.0267595	0.0443053	-0.0775994	0.0546689	-0.0260716	0.0798384	-0.0234563	0.138451	0.0514236	0.0781266	0.0203161	0.0627388	0.0998268	0.00595801	0.00861178	DDHD2
ENSG00000085832	CD8T12	-0.0202937	-0.0432271	-0.0602198	-0.030011	0.125669	0.0410565	-0.0532172	-0.0690567	-0.0460067	0.00997487	0.0429196	-0.0132036	0.0927245	0.00465971	-0.00726481	-0.0650059	0.0436324	-0.0159616	-0.0550649	-0.137734	EPS15
ENSG00000085872	CD8T1	0.143534	0.122056	-0.0207955	-0.0369749	0.0031832	0.0487289	0.021629	-0.0712831	-0.0763564	-0.0556734	-0.00833246	0.032156	0.00288953	0.0563708	-0.0492522	-0.110235	0.0983925	0.103778	0.0574191	-0.00363425	CHERP
ENSG00000085978	grey	0.0931729	0.0159503	0.0647051	0.0450951	0.038934	0.0662443	-0.00888112	-0.00914322	0.0787674	0.0225318	-0.0184463	0.0516512	0.0414486	0.0690624	0.0379305	0.00710672	0.0414413	0.0105968	-0.0441933	0.0346091	ATG16L1
ENSG00000085982	grey	-0.0252934	-0.103648	-0.133252	-0.0933696	0.0266596	-0.0428419	0.00667822	-0.00425163	-0.039943	-0.00186361	0.000298311	-0.0735516	-0.0587798	-0.0498083	0.0350722	-0.0387898	0.0426019	0.0015817	-0.0829464	-0.0444031	USP40
ENSG00000085998	grey	0.116312	0.122985	-0.0522761	-0.0698779	0.123055	0.0929528	0.157901	-0.0266508	0.0250609	0.00625915	0.061973	0.0242776	0.0845572	0.0940941	0.172837	-0.0166295	0.0459179	-0.0290907	-0.0389773	-0.0520255	POMGNT1
ENSG00000086015	grey	-0.00300023	-0.040836	-0.119525	0.0117635	0.0556494	-0.00045203	0.0522648	0.00669442	-0.0321408	0.0338766	0.0433139	-0.0713668	0.0211132	0.0191984	-0.0112973	-0.0279093	0.0143784	0.0143944	-0.0787557	-0.0550326	MAST2
ENSG00000086061	CD8T10	0.220247	0.167577	-0.032113	-0.238745	-0.024056	0.0992814	-0.0875593	-0.0480486	-0.0410562	-0.0452217	0.17049	0.0357843	0.0469584	-0.0237362	0.0856439	0.0581265	0.0539585	-0.0111277	0.000720528	-0.073218	DNAJA1
ENSG00000086062	grey	0.123117	0.139178	0.00135656	-0.0587587	0.0691587	0.0989185	-0.064038	-0.0468848	-0.157756	-0.0528804	0.017711	-0.0654569	0.0125065	-0.151673	-0.116863	0.00224842	0.0361164	-0.0782	0.0526979	-0.191282	B4GALT1
ENSG00000086065	grey	0.0462295	-0.00138288	-0.0175005	-0.00378796	0.0725956	0.0897129	0.0504696	-0.0657877	-0.0388593	-0.0349647	0.0711371	0.0090116	0.102878	-0.0937238	-0.14238	-0.0595837	-0.0351169	-0.0435154	0.172484	0.0367214	CHMP5
ENSG00000086102	CD8T13	0.0347525	0.0905857	-0.0192512	0.105752	-0.0284557	-0.01434	-0.027893	0.0531389	-0.0158687	-0.00737273	-0.0349278	0.11541	-0.0597842	0.0911442	-0.0175721	-0.0094703	0.0959419	-0.0396157	0.0932445	0.0785051	NFX1
ENSG00000086189	grey	0.0399412	0.0181143	0.0333989	-0.00801775	0.00923361	-0.017142	-0.0868386	-0.112953	-0.0338655	-0.0587581	-0.0355602	-0.0112591	0.0154934	0.0314004	-0.0273392	-0.0569872	0.00310619	0.0511594	-0.0508273	-0.106163	DIMT1
ENSG00000086200	grey	0.0645437	-0.0221504	0.0434441	0.00906826	0.106403	0.00844874	0.061727	0.0334045	-0.0305203	-0.036536	0.069041	-0.00294603	0.068469	-0.0548387	-0.0909748	0.0435354	0.11742	-0.0448239	0.0689919	-0.0131825	IPO11
ENSG00000108298	CD8T2	0.342001	0.513634	-0.0623315	-0.06925	0.0344609	0.110376	-0.103007	-0.128657	0.0253127	-0.038785	0.0260151	0.148077	0.15938	0.10632	-0.0809163	-0.146277	0.0791691	0.14	-0.0425303	-0.120602	RPL19
ENSG00000086300	CD8T6	0.014785	-0.000503469	-0.0977452	-0.0702447	-0.068323	0.113758	-0.0134385	-0.108986	-0.034394	0.0117047	-0.000404143	0.0845294	0.045199	-0.00530818	-0.0199737	-0.0800083	0.101491	-0.00864837	-0.0790975	-0.00648803	SNX10
ENSG00000086475	grey	-0.0230854	0.0748828	-0.0280376	-0.0466277	-0.00832115	-0.0691248	0.0288106	0.0817215	0.0191214	-0.0341182	-0.00307513	0.00676509	-0.0661606	-0.0379411	-0.0563049	0.0207117	-0.0368706	-0.0117776	0.0522733	-0.0622662	SEPHS1
ENSG00000104824	CD8T4	-0.0917601	-0.00686283	0.0796319	0.256367	0.0879882	-0.10128	0.0273104	0.095854	-0.0524486	0.0183784	-0.216947	0.0929946	-0.0657565	0.0786533	-0.0428937	-0.0812329	-0.0479623	-0.0513359	0.0764296	0.135834	HNRNPL
ENSG00000086598	grey	0.0460756	0.109582	0.0103012	0.0882647	0.0625286	0.00815032	-0.00878733	-0.0625959	-0.105306	-0.0321478	-0.0796406	0.207358	-0.0448747	0.0971027	-0.0882559	-0.0965844	0.0241141	-0.128544	0.149276	-0.0110041	TMED2
ENSG00000231500	CD8T2	0.27516	0.511407	0.0193012	0.0243059	0.042231	0.0337574	-0.0748672	-0.073493	0.0132851	-0.00794135	-0.049874	0.263438	0.141837	0.108203	0.0098575	-0.15501	0.070532	0.110858	0.0121014	-0.0358232	RPS18
ENSG00000086666	CD8T13	0.0955477	-0.00454287	-0.0642518	0.0386042	0.131301	0.0739549	-0.0409164	0.0265866	-0.00671722	-0.0533578	0.0146639	0.0557538	0.127359	0.147694	0.0232164	-0.0843366	0.107824	0.0749642	-0.0225318	-0.089166	ZFAND6
ENSG00000086712	CD8T11	-0.018596	-0.0211276	0.0702891	0.157255	-0.0796421	0.108813	0.0755017	0.0319193	0.0500247	0.0815684	-0.0581021	0.223328	-0.0202918	0.0784804	0.0518279	0.0166849	0.0767943	0.00071955	0.00515792	0.0690099	TXLNG
ENSG00000086730	grey	-0.113674	-0.094693	0.0673821	0.0320523	-0.0735204	0.0239941	0.148486	0.128074	-0.0928005	-0.00312776	0.0334733	0.0364765	-0.073071	0.0191466	-0.0667819	0.180962	-0.0553081	-0.0866137	0.160008	-0.00161866	LAT2
ENSG00000086758	grey	0.0380575	-0.0508647	-0.0352722	-0.00981627	0.0804583	-0.0253649	0.0714575	0.0826964	-0.00362526	-0.021578	0.124216	-0.00538193	0.115724	-0.0662105	0.0666451	0.0973657	-0.0146432	-0.0604318	0.00415664	0.0103698	HUWE1
ENSG00000086827	CD8T9	-0.0547474	-0.0372716	0.222603	0.0591796	-0.0648897	0.0605564	0.084391	0.0823769	0.0832635	0.142718	0.0932769	0.120359	0.0268072	0.0729054	0.113187	0.123697	0.0615875	0.00604563	-0.111161	0.11846	ZW10
ENSG00000086848	CD8T19	-0.0466402	0.0197203	0.0266657	0.0229098	-0.0568976	0.0574051	0.0509698	-0.0911738	-0.00578611	0.0966322	-0.00394722	0.0990923	0.0698582	0.0568295	0.0537573	-0.0330389	-0.00152846	-0.0901691	-0.0559027	0.0503827	ALG9
ENSG00000087008	grey	-0.0490115	-0.0639383	0.0609874	0.0740822	0.0120375	-0.116938	0.0235582	0.1127	0.0104008	-0.0143005	-0.0250786	-0.0723769	-0.0609303	-0.0658975	-0.016472	0.0986987	-0.0852135	0.0949655	0.109809	0.0262912	ACOX3
ENSG00000087053	CD8T8	-0.0373717	-0.0851682	0.0696159	0.0284932	-0.0201375	-0.0252703	0.107125	0.0433848	0.151389	0.190346	0.0306664	-0.0208671	0.0816536	0.0894248	0.140473	0.0332188	-0.106822	0.0805691	-0.0834724	0.0127557	MTMR2
ENSG00000087074	grey	-0.0317839	-0.054257	-0.166293	0.0269093	0.00573098	-0.11505	-0.0573637	-0.0244496	-0.0202271	-0.0352694	-0.107788	-0.127393	0.0182802	-0.0326878	-0.0628604	-0.126269	-0.160076	-0.0321919	-0.0495888	-0.0518996	PPP1R15A
ENSG00000168028	CD8T2	0.349809	0.508165	-0.0260209	-0.0364522	0.0567237	0.0389879	-0.14304	-0.18792	-0.0346187	0.00281271	-0.0653008	0.107769	0.229058	0.00369064	-0.07929	-0.239947	-0.0430421	0.188459	0.033388	-0.105828	RPSA
ENSG00000087087	grey	0.0405112	0.106731	0.0183692	0.00354086	0.143446	0.155499	-0.0169669	-0.0194838	0.0692813	-0.00816828	0.0442778	0.030376	0.113685	-0.0499371	-0.0115465	0.0319205	0.0589779	0.0132834	0.111777	0.0327299	SRRT
ENSG00000087088	grey	0.0395504	0.0823399	0.0229286	-0.0884367	-0.131306	0.0163656	-0.00316856	-0.0581834	-0.0682279	-0.0368296	-0.0755077	0.0131804	-0.0826714	-0.0726309	-0.0705834	-0.0484605	-0.0430331	-0.0828523	-0.0680312	-0.0229759	BAX
ENSG00000087095	CD8T15	-0.070425	-0.0756707	0.129844	0.0181676	-0.0221617	0.0712413	0.0870839	0.005536	0.0379829	-0.0105174	0.0108777	0.0341028	-0.0639416	0.0242963	-0.000160551	0.218465	0.0436126	-0.0590123	-0.0107642	0.0559781	NLK
ENSG00000087111	grey	0.0147882	0.0132768	0.0736103	0.0068491	-0.0969335	0.00229363	0.0487496	-0.0612352	-0.0898184	0.0960411	-0.0839852	0.0774002	-0.0973432	-0.0161601	-0.0535464	-0.0231354	-0.0243706	-0.0124438	0.0392625	-0.0332901	PIGS
ENSG00000087152	grey	0.010335	0.11717	-0.00235955	0.108676	0.0311779	-0.0819751	-0.0376347	0.0278944	0.0249711	-0.00869341	-0.0946119	-0.121903	0.0401704	0.00177195	-0.0364565	-0.0136213	-0.0473095	0.0767943	-0.0115545	0.0707004	ATXN7L3
ENSG00000087157	grey	0.0353423	-0.0911158	0.0703395	-0.018714	-0.067489	0.0386168	0.112279	-0.0854628	-0.0593098	-0.037272	0.0464833	0.0220095	-0.0288287	0.0765098	-0.00235539	-0.0220729	0.132746	0.00636464	-0.0869872	0.0430981	PGS1
ENSG00000087191	CD8T1	0.0962588	-0.0283512	-0.0297092	-0.15814	0.0693412	0.0523243	0.115267	0.0100644	0.0313755	-0.0245669	0.190072	-0.0302077	0.0799188	0.0505977	0.0706441	0.0189284	0.0613916	0.0614845	-0.0571607	0.00771221	PSMC5
ENSG00000087206	grey	0.0692428	0.0598718	0.0159384	-0.0339166	0.082658	0.0119657	-0.0114277	0.0778523	0.000517493	-0.0172267	0.0669079	-0.0646607	0.0957639	-0.0583869	0.0155821	0.10413	0.0238079	-0.0444786	-0.0163506	0.0186958	UIMC1
ENSG00000087250	grey	0.0784288	-0.0309878	-0.0447297	-0.0444653	0.0166735	0.00457666	-0.0353892	-0.0605926	-0.0171402	-0.0545188	0.0696901	-0.0432625	0.168985	0.0100475	0.025011	-0.0489372	-0.0769156	-0.0789546	0.0461854	-0.0424808	MT3
ENSG00000087253	grey	-0.0713531	-0.0517658	0.0146485	-0.0355871	0.000610026	0.0871363	0.504676	-0.0207247	-0.0230103	0.204309	0.0948893	0.027382	0.0273355	0.00367782	0.143555	0.162391	0.140588	0.00808311	-0.0639976	0.0773492	LPCAT2
ENSG00000087258	grey	-0.10675	0.0146451	0.0338308	0.0257773	0.0718758	-0.00341674	0.0194957	0.0190288	-0.0418637	-0.002095	-0.0480777	0.0325316	-0.124278	0.00340422	0.0073227	0.0587172	0.0652254	-0.0346857	-0.0155796	0.0496061	GNAO1
ENSG00000087263	grey	0.0884782	-0.0061062	-0.192661	-0.144001	0.0901031	0.0131299	-0.0956287	0.0578665	0.0585592	-0.113162	0.0600179	-0.148609	0.0116252	-0.0894888	-0.0538809	0.0485841	0.0546739	-0.000805056	0.0109252	-0.110354	OGFOD1
ENSG00000087266	grey	0.0329412	0.11596	0.00806468	0.109163	0.0248743	0.0456328	0.156655	0.0334384	0.101079	0.0877751	0.0168718	0.168531	0.144632	0.149069	0.153496	0.022978	0.0591289	0.0330747	0.145724	0.0923948	SH3BP2
ENSG00000179094	CD8T4	-0.0261393	0.0853336	0.0314441	0.255945	0.014739	-0.106348	-0.00234709	0.0549982	0.0922756	0.0432732	-0.165772	0.0110281	-0.0332754	0.0166293	-0.0571267	-0.0896434	-0.105158	-0.0195718	0.0201483	0.0444664	PER1
ENSG00000087274	grey	0.0374877	-0.0234135	-0.0724687	-0.000169507	0.0246227	-0.0513405	0.00602399	0.0489595	-0.0283475	0.102684	0.0190559	-0.0500198	0.0197626	-0.0466289	-0.0256505	-0.0508406	-0.0598741	0.185302	0.0361964	-0.0369571	ADD1
ENSG00000087299	grey	-0.0357277	-0.0473836	-0.0642494	0.0544719	-0.000114941	-0.0488974	0.140748	0.109073	0.00664427	-0.00612758	0.00621717	-0.0465562	-0.00662446	0.077312	0.0758016	0.0529149	0.0656477	0.0647658	0.0888271	0.0397699	L2HGDH
ENSG00000087301	grey	0.0962993	0.0829763	0.0429132	-0.0245676	0.0953372	-0.0220348	0.0253946	-0.0582268	-0.129681	0.0179213	0.0634508	0.0962455	0.025898	0.0371972	-0.0246156	-0.0635288	-0.04837	0.0270874	-0.0664521	-0.0140091	TXNDC16
ENSG00000087302	grey	0.0477241	0.0498622	-0.0673507	-0.0834278	0.0173608	0.0487706	-0.0135349	0.0372555	-0.0687998	0.0279088	0.0450959	-0.027452	0.015626	0.0317983	0.114099	-0.0119089	0.00985137	-0.0809304	-0.0542119	-0.084253	RTRAF
ENSG00000087338	grey	0.0211619	0.0243544	0.0271007	0.0649693	-0.0858079	0.0375427	-0.0183303	-0.0199104	0.0831182	-0.0893957	-0.0838373	0.0441937	-0.00628014	0.03401	0.00415259	-0.0658102	0.0563216	-0.0835998	-0.00977404	0.00788778	GMCL1
ENSG00000087365	grey	0.127478	0.117255	0.0146798	0.139891	-0.089062	0.00467727	0.044312	-0.001342	0.0561174	0.14483	-0.136782	0.144543	0.0999141	0.0858951	-0.0432815	-0.0840968	-0.00649528	-0.0201775	-0.0161422	0.103861	SF3B2
ENSG00000161016	CD8T2	0.307937	0.506262	-0.0886987	-0.00324718	-0.0161397	0.0876022	-0.0573095	-0.0684489	-0.109226	0.00132179	-0.0252565	0.176649	0.0605251	0.0119901	-0.0100138	-0.111607	0.0535408	0.0946227	-0.0419697	-0.0372932	RPL8
ENSG00000087460	CD8T12	0.0702038	0.129131	0.0386334	-0.0746433	0.0882204	0.136414	-0.108662	-0.0463122	-0.0258482	-0.0975139	0.0787899	0.0667903	0.149319	-0.0111316	0.00179419	0.0211837	0.0376082	-0.0528278	0.0824295	-0.0648274	GNAS
ENSG00000087470	grey	0.0560953	0.0861715	-0.0211365	-0.0107836	0.0506798	0.0174252	-0.0484654	0.0233482	-0.0433392	-0.104156	0.00103119	0.0725402	0.0268698	-0.0332595	-0.0114288	-0.0181831	0.0698168	-0.0583395	0.103363	-0.0223744	DNM1L
ENSG00000087495	CD8T9	0.00842437	0.0705435	0.0776475	0.0600083	-0.106133	0.0841117	0.106068	0.0368884	0.160095	0.197858	0.0735283	0.026199	-0.0583664	0.168083	0.00915737	0.0983343	0.169706	0.0625169	-0.0562792	0.0938712	PHACTR3
ENSG00000087502	grey	0.0298967	0.0225328	-0.0282109	-0.036448	0.0238315	-0.0694659	-0.0961111	-0.00605173	0.0118515	-0.0209868	0.00969313	0.00729362	0.0545498	-0.0670381	-0.0453541	-0.0723402	-0.060583	-0.0134418	-0.0120508	-0.0504481	ERGIC2
ENSG00000087589	CD8T3	-0.103607	-0.0544806	0.285239	0.0683277	-0.192407	0.0451476	0.116558	0.00377389	0.0759677	0.065756	0.0035681	0.0507562	-0.0984828	0.00316115	0.0254709	0.187591	0.0697063	-0.0993913	-0.0994432	0.0834098	CASS4
ENSG00000087884	grey	0.0372125	0.0344958	0.0371782	0.0236765	-0.0409373	-0.0348375	-0.079119	0.0414262	0.0268198	-0.0107945	-0.0328718	0.0121357	-0.0365817	-0.0444369	0.0340795	-0.0426891	-0.0516697	0.0500408	0.0280081	0.0465797	AAMDC
ENSG00000087903	CD8T9	-0.0537795	0.0754883	0.0923236	0.0056137	-0.057997	0.0857241	-0.0505285	-0.0147418	0.0892393	0.124836	-0.0552068	0.0474899	0.0156599	0.0226197	0.0626366	-0.0317998	-0.0381996	-0.0349974	-0.0861706	0.00690864	RFX2
ENSG00000087995	CD8T1	0.125116	0.0374122	-0.154828	-0.18692	-0.0361085	-0.0281502	0.0751349	-0.0255775	-0.0385685	-0.0624391	0.109314	0.0370591	0.113964	5.31113e-05	0.117901	-0.0357234	0.140474	0.086091	-0.0260268	-0.120451	METTL2A
ENSG00000088035	grey	0.000623042	-0.0304271	0.0394114	-0.0519309	-0.114126	-0.00171203	-0.0107284	0.0217164	0.0116893	-0.00680901	0.0155727	0.0464955	-0.114964	0.0404857	0.0372311	0.123932	0.0702343	0.0017591	-0.0212779	0.0466127	ALG6
ENSG00000088038	grey	-0.0201628	-0.108179	0.0239842	-0.0377124	0.051735	0.0696144	0.123264	0.0266353	-0.00454575	0.0044048	0.0863926	0.0614831	0.0443291	0.0797015	0.103272	0.0704438	0.153908	0.0284066	-0.0810327	0.0545154	CNOT3
ENSG00000088179	CD8T12	0.12301	0.114398	-0.00873116	-0.0429268	0.184496	0.138895	0.0518513	-0.0197888	-0.000954204	0.0442822	0.117673	0.106385	0.274412	0.0881735	0.0653823	-0.0448251	0.116985	0.0308003	-0.00940814	0.0304578	PTPN4
ENSG00000088205	grey	0.147303	0.188914	0.0169933	0.0718593	0.0608203	0.0817167	0.0856725	0.0178378	-0.0441843	0.120024	0.0261022	0.18478	0.0324335	0.0778113	0.0641138	0.0707613	0.0634116	-0.0384852	0.0163332	0.0461049	DDX18
ENSG00000088247	grey	0.0370847	0.0835089	-0.0169048	0.0362939	0.00827845	-0.0523045	-0.0589909	0.0802661	0.103987	-0.106334	-0.0589778	-0.0157793	-0.0515684	0.0898266	-0.00625868	0.0179437	0.0718698	0.114176	-0.0553232	0.0336671	KHSRP
ENSG00000088298	grey	-0.0870586	0.00247231	0.215935	0.123602	-0.0750389	0.0158894	0.0436559	0.0856252	0.0170006	-0.0518352	-0.0880109	0.180857	-0.0449076	0.136472	-0.0877097	0.00515949	0.134203	-0.0874557	0.0773193	0.0640555	EDEM2
ENSG00000088367	CD8T10	0.132763	0.0579987	0.0622181	-0.0773219	0.0249001	0.0100582	0.0457459	0.0338807	0.0925991	0.101116	0.0914599	-0.0309187	0.0707138	-0.0290116	0.00298367	-0.0129644	0.0403764	0.139159	-0.000518839	-0.0966763	EPB41L1
ENSG00000088387	CD8T10	0.0297788	-0.118181	-0.0637631	-0.0978619	0.033181	-0.00220903	-0.0833932	0.0586993	0.053705	-0.131455	0.131198	-0.108145	0.0275565	0.0723236	-0.0101039	0.0639103	0.104197	0.0336877	-0.0541085	-0.100003	DOCK9
ENSG00000088448	grey	-0.00835903	-0.103182	0.13199	-0.00909326	-0.0658175	0.0274559	0.066353	0.0870766	0.163306	0.0694435	0.0704784	0.0291751	0.0164683	0.0908872	0.17243	0.19702	0.144158	-0.0400298	-0.00543383	0.0956616	ANKRD10
ENSG00000088451	grey	-0.0227163	-0.0484492	-0.0378619	0.0275877	-0.0392697	-0.0271649	-0.104522	-0.0195403	-0.0114481	-0.0173883	-0.0322108	-0.058166	-0.215116	0.06724	-0.0482602	-0.0300702	0.0544794	-0.0618253	0.0210748	0.0441226	TGDS
ENSG00000088538	CD8T9	-0.171172	-0.105604	0.170886	0.161818	-0.045885	-0.0268133	0.0540118	0.0734961	0.156765	0.0871852	-0.106262	-3.34154e-05	-0.0605985	0.0884309	0.0855476	0.0607377	-0.0490544	-0.00895504	-0.0441249	0.214716	DOCK3
ENSG00000088682	CD8T13	0.0240432	-0.0594956	-0.00021162	0.0219085	-0.0582011	0.0638497	0.00902052	0.0381877	0.013069	0.016094	-0.0283569	0.00665513	0.035313	0.0312424	0.10036	-0.0024554	0.0933711	0.000470713	-0.0155774	0.0133336	COQ9
ENSG00000088766	grey	0.0531355	0.000338972	0.0555441	-0.0401236	0.0117695	0.0905665	-0.0143539	0.0840172	-0.00702656	-0.00787161	0.039911	0.0839401	-0.0403587	0.109035	0.0641736	0.143134	0.139206	-0.0300655	-0.0265778	0.00265556	CRLS1
ENSG00000088808	CD8T12	0.00583601	0.0736072	-0.0289709	-0.106473	0.0316763	0.0353719	0.0591066	-0.141542	-0.0642986	0.109422	0.052656	0.055534	0.106643	-0.0756039	0.0467796	-0.0935245	-0.0919043	0.0209716	-0.0141641	-0.0330746	PPP1R13B
ENSG00000088812	grey	0.0835822	0.0490496	0.00686936	0.0210534	0.0300243	0.141098	0.0826757	-6.30063e-05	0.0697619	0.0877369	0.0589578	0.0542183	0.0799674	-0.0159747	-0.0224168	-0.00447915	0.0244128	-0.00275769	0.105997	0.0332974	ATRN
ENSG00000088832	CD8T13	0.0341938	0.104292	0.0584764	-0.012475	-0.0491344	-0.0417148	0.0455996	-0.0994205	0.0857095	0.0457598	0.0251446	0.0959082	0.0061444	0.131766	0.12023	-0.0532417	0.0346493	0.0912774	-0.10861	-0.0296195	FKBP1A
ENSG00000088833	grey	0.0044357	0.0414284	0.0988926	0.00111399	0.00552897	0.0637924	0.0542878	-0.0120738	-0.0414923	0.0882147	0.0214283	0.0613133	0.0346161	-0.0736146	-0.0678102	0.107573	-0.0206162	-0.0174162	-0.0326269	0.0906289	NSFL1C
ENSG00000088854	grey	-0.0499293	0.0249289	0.102971	0.128443	-0.199793	-0.0475264	0.0919306	0.111702	0.111545	0.122286	-0.00896625	0.106012	-0.130811	0.083839	0.109626	0.152814	0.187423	-0.0398033	0.0139591	0.180781	DNAAF9
ENSG00000088888	grey	-0.0978495	0.0142393	0.217215	0.138215	0.0220984	0.00583259	0.0567781	0.0631054	0.0232092	0.0110681	-0.106798	0.127984	-0.0858637	0.0593272	-0.0306001	0.048204	-0.00492088	-0.0236879	0.060604	0.163727	MAVS
ENSG00000088930	grey	-0.119403	-0.147107	0.132723	0.0231599	-0.0111695	0.113969	0.0427968	0.135955	0.0151276	0.00552623	0.0696232	-0.0393934	-0.0402291	0.00493564	0.0630374	0.15705	0.0343786	-0.0529944	0.0853755	-0.00090002	XRN2
ENSG00000088970	grey	-0.0628293	-0.0849104	0.0750863	0.0374092	-0.000631167	-0.0209738	0.0981809	0.0959124	0.181649	0.115933	0.101638	-0.0920514	-0.00367949	0.0468095	0.0933787	0.058523	0.091152	0.166941	-0.0136569	0.0690919	KIZ
ENSG00000088986	grey	-0.035802	0.0595775	-0.00474017	-0.00152118	-0.119796	0.0446653	0.0211619	-0.0228334	-0.0411246	-0.0559214	0.00145621	0.136768	0.0104917	-0.0666378	-0.0224612	0.0677778	0.0280955	-0.0532263	0.051252	0.0451656	DYNLL1
ENSG00000088992	grey	-0.0096082	-0.0454852	0.0594247	-0.0547586	0.0592572	0.134236	0.0420975	0.0717221	0.100993	-0.0801727	0.0654894	0.00724894	0.0953332	-0.116188	0.0241345	0.146571	0.0112174	0.0108341	0.0910169	-0.00567302	TESC
ENSG00000089006	grey	0.0931563	0.038003	-0.0130669	-0.00609449	0.104099	0.0352186	-0.0156584	0.080272	0.0521388	-0.000438176	0.112739	-0.0973478	0.111493	-0.0261779	-0.00982027	-0.0550831	0.0344908	0.0684409	0.106016	-0.0771051	SNX5
ENSG00000089009	CD8T1	0.408736	0.413003	-0.0302538	-0.0091469	0.141035	0.095324	-0.00475075	-0.071563	-0.0237305	0.0530476	0.0801488	-0.019946	0.223373	0.149742	-0.0434652	-0.162446	0.0390805	0.187908	-0.0138002	-0.186411	RPL6
ENSG00000089012	CD8T10	0.0229422	7.9871e-05	-0.049447	-0.120969	0.0332464	-0.00297896	-0.0229068	0.0208367	-0.00235018	-0.0416536	0.125028	-0.0455401	0.0511318	0.0425774	0.186972	0.0381852	0.0208321	0.0863579	-0.141839	-0.0251589	SIRPG
ENSG00000089022	CD8T16	0.00101668	-0.0171406	0.13052	-0.0333274	-0.0489111	0.0927095	-0.0447928	0.0811627	0.0810272	0.0588683	0.00660964	0.0853767	-0.106541	0.10035	0.00551896	0.168148	0.195768	-0.0329695	-0.0658264	-0.0416417	MAPKAPK5
ENSG00000089041	grey	-0.0477972	-0.199404	0.0329157	-0.0331306	-0.126342	0.0553709	0.00749361	0.0900644	0.0240545	0.0236775	0.0777245	-0.025396	-0.0308314	-0.00411744	0.104667	0.104302	0.0482704	-0.114602	-0.114738	0.0364144	P2RX7
ENSG00000089048	grey	0.125735	0.0189159	0.00425566	-0.0961535	0.0742225	0.0101166	0.0461694	-0.00734495	0.0315838	0.00442907	0.14238	-0.0681433	0.140832	0.0524781	0.0708832	0.0149926	0.123022	0.0795898	0.00916741	-0.0110316	ESF1
ENSG00000089053	grey	0.113916	0.0687101	0.11116	0.000131222	0.039334	0.0524754	0.0595056	0.0668878	0.0361379	-0.000482109	0.00492484	0.036146	-0.0142236	0.0940316	0.115846	0.0601468	0.0905826	0.0797562	0.0780496	-0.0456786	ANAPC5
ENSG00000089057	grey	0.0379661	0.0642401	0.00558195	0.0416791	-0.0273499	-0.00828703	0.188541	0.0460734	0.0692033	0.167436	-0.00271527	0.0813669	0.0439042	0.0230918	0.0188498	-0.0352271	0.020448	0.048427	-0.0762094	0.0771266	SLC23A2
ENSG00000089060	grey	0.0703873	0.0308066	-0.00150934	-0.0124331	0.180245	0.0458539	0.0313206	-0.0645277	0.0375908	0.026597	0.0719577	-0.023828	0.0972704	-0.0312262	-0.0244825	-0.0129171	-0.0332495	0.0251532	0.0945309	0.045354	SLC8B1
ENSG00000089063	CD8T9	0.0331963	0.00835316	0.164178	-0.0068231	0.0355313	0.066148	0.0841402	-0.045558	0.0767188	0.17467	0.0685675	-0.0419001	0.0683895	0.0919079	0.033677	-0.00129267	0.0505881	0.0542724	-0.0707055	-0.0796111	TMEM230
ENSG00000089094	grey	-0.0123344	-0.0865017	-0.0268543	-0.00925584	0.151885	-0.0503642	0.0710726	0.0903851	0.0450077	-0.0139897	0.117672	-0.139965	0.129639	-0.0848878	0.0432495	0.0608805	-0.0591849	0.0734808	0.0476775	-0.011092	KDM2B
ENSG00000089123	grey	-0.0208145	0.0261157	-0.000827041	0.0307746	-0.108395	0.046449	0.113235	0.0259324	0.0312325	0.0350075	0.0178445	0.00336717	-0.0487643	0.0364753	0.0331036	-0.00520498	0.143951	0.0231097	-0.10544	0.0625852	TASP1
ENSG00000089154	grey	0.0264292	0.00028529	0.0765582	0.0592305	-0.0526346	-0.013205	0.107147	0.0160082	0.0730151	0.0648703	-0.0175588	0.0760334	-0.0480486	-0.000138571	0.0284187	-0.0363669	0.0595747	-0.0276671	0.0282112	0.0727423	GCN1
ENSG00000112306	CD8T2	0.299533	0.504116	0.0243486	0.0299532	0.0578467	0.0103133	-0.0765291	-0.0579438	-0.00559867	0.0340786	-0.053756	0.22078	0.0859389	0.0738943	-6.25447e-07	-0.126652	-0.0840505	0.16774	0.0556357	-0.0610525	RPS12
ENSG00000157514	CD8T4	-0.0440015	0.184114	-0.00377642	0.25549	0.07426	-0.256212	-0.174611	0.00863725	-0.0766589	-0.00450287	-0.293216	0.0645536	-0.156067	0.0404156	-0.171051	-0.178525	-0.273103	0.0147895	0.0700329	-0.0232148	TSC22D3
ENSG00000089169	CD8T13	-0.0138096	-0.00241806	-0.0162049	0.0986286	0.00339538	-0.0767898	-0.0403835	0.0596494	0.12939	0.0673272	-0.0457052	0.100197	-0.0350265	0.151191	-0.05201	-0.0293237	-0.00317324	0.0142981	0.0357875	0.0454908	RPH3A
ENSG00000089177	grey	0.0266155	-0.0704364	-0.115586	0.0281073	0.0746097	-0.160383	-0.0646509	0.13538	0.0251961	-0.105702	-0.00637881	-0.066466	-0.0563214	0.094208	0.0197962	0.0188767	0.0330048	0.216145	-0.00939237	-0.0554231	KIF16B
ENSG00000089195	grey	-0.0582385	-0.00106295	0.0490419	0.0585787	-0.00966438	-0.0179058	0.0675231	-0.00521297	-0.0587756	-0.00940135	-0.0724887	0.0499593	0.034076	0.021546	-0.0105325	0.0612664	-0.0427694	-0.0495205	0.0122247	-0.014591	TRMT6
ENSG00000089220	grey	0.0718034	0.17297	0.0201383	-0.0274267	0.0668742	0.081348	0.0292219	-0.0547955	0.0593455	-0.022286	0.017582	0.0592929	0.013432	0.0521161	0.0410742	0.0450238	0.00255361	0.00217929	0.00548482	-0.0660383	PEBP1
ENSG00000089234	CD8T10	-0.004926	0.0268994	0.0713482	0.0187168	-0.0954101	0.0488822	0.0152179	0.0709405	0.0282481	-0.0180145	0.0921103	-0.0850417	-0.0459341	-0.0122879	-0.0833792	0.0420662	0.0541779	-0.0715491	0.0900855	-0.0198896	BRAP
ENSG00000089248	CD8T1	0.189131	0.15786	0.0665951	-0.071409	0.000315266	0.144825	-0.0584485	-0.0390317	-0.00341487	0.0731431	0.0628867	0.057157	0.108587	-0.00951963	0.0146202	0.0329641	0.0785401	0.0379554	-0.0014536	-0.0280406	ERP29
ENSG00000125384	CD8T4	-0.0127812	0.0616873	0.0410809	0.255206	0.0247373	-0.125039	0.0305576	0.0542478	-0.000140019	0.113774	-0.194382	0.144578	-0.0893238	0.134616	-0.0966057	0.0216497	-0.143273	0.0586217	0.161669	0.174271	PTGER2
ENSG00000089289	CD8T15	0.00400533	0.104556	-0.0568662	-0.047014	0.053589	0.0164067	-0.00185161	0.104733	0.117064	-0.0141474	0.0279215	0.0284125	0.0176282	0.0114348	0.131472	0.142418	-0.0010449	0.0749567	0.00942874	0.109086	IGBP1
ENSG00000089327	CD8T3	0.00905669	0.0792321	0.156088	0.131208	0.104783	0.0749599	0.0342655	-0.017909	0.00322476	0.0855772	-0.0549418	0.160417	0.110692	0.0735164	0.0528627	0.0881897	0.0393952	-0.0114468	0.119075	0.0523012	FXYD5
ENSG00000198755	CD8T2	0.424634	0.500262	-0.0536274	0.0411996	0.0601191	0.0580293	-0.0840568	-0.00365861	-0.0283918	0.0391429	-0.0167071	0.110379	0.185473	0.143134	0.00832169	-0.18579	0.0330792	0.17336	-0.00293899	-0.0896699	RPL10A
ENSG00000089351	grey	-0.00382478	0.0412548	0.038121	0.0131711	0.0499016	0.0874972	-0.0471923	-0.0883646	-0.0781673	-0.0293854	-0.0559062	-0.00914283	-0.022491	0.00766172	0.00476847	-0.0637572	-0.0265109	-0.0847308	-0.119943	-0.0940014	GRAMD1A
ENSG00000089486	grey	-0.0365395	0.0211167	-0.129442	-0.000457151	-0.0218567	-0.00726705	0.109223	-0.0796718	0.0415701	-0.0438949	0.0183809	0.0315198	0.119894	-0.129807	0.0821284	0.0333465	-0.00481364	0.0410267	0.0657046	0.10507	CDIP1
ENSG00000089505	CD8T7	-0.0755345	0.000435217	0.17985	0.0966696	-0.153313	-0.00431563	0.0658554	0.238569	0.00384528	0.0444221	-0.0190331	0.153208	-0.0867747	0.167256	0.0591513	0.2873	0.0275517	-0.0145496	0.000467655	0.0343141	CMTM1
ENSG00000089597	grey	0.00922701	0.00495418	-0.072969	0.0256493	-0.0681539	-0.0570898	-0.021969	-0.055559	0.0936379	-0.0169648	-0.0998866	0.0311863	-0.0258144	0.0180999	-0.0408006	-0.128526	0.0586637	0.109736	-0.0554549	-0.00284933	GANAB
ENSG00000089639	grey	0.113917	0.0700185	-0.0468616	0.0443317	0.0122656	0.159485	0.112729	-0.0155417	-0.0326472	0.0276996	0.00781772	0.0271615	0.00263037	0.0528675	-0.0143911	-0.0500804	0.075964	-0.000653807	-0.00462613	0.017775	GMIP
ENSG00000089682	grey	0.0241018	-0.0482408	0.044621	0.0949925	-0.0482326	0.0136332	-0.0152423	0.00433925	-0.0262712	0.0178878	-0.0704273	-0.0317731	0.0339278	0.139474	0.0254311	-0.0268769	0.0542155	0.00492163	-0.143583	0.0371508	RBM41
ENSG00000134242	CD8T4	-0.0280191	0.150472	0.0576139	0.253713	0.0541799	-0.0413719	-0.0384653	0.00469574	-0.0767836	0.0131723	-0.218409	0.0170055	-0.0547799	0.0985056	-0.140569	0.0119331	-0.159535	-0.0166609	0.0782068	-0.029152	PTPN22
ENSG00000089693	CD8T9	0.0308989	0.107678	0.0410019	0.0657009	-0.0434508	0.0069411	-0.0577944	-0.0876219	-0.0537414	0.0660797	-0.110609	0.0729307	-0.0201152	0.093769	-0.0566391	-0.0743084	-0.0215673	-0.0787298	-0.0744745	-0.0673488	MLF2
ENSG00000089737	grey	0.0124452	0.0827439	0.0476003	-0.0455954	0.00152933	0.106844	0.0566466	-0.0497175	0.0340874	-0.0285984	0.0121049	0.0199365	-0.0138673	0.00790864	-0.0219134	0.0765095	0.0662272	0.00979496	0.0890622	-0.0303036	DDX24
ENSG00000174748	CD8T2	0.320306	0.499095	-0.017892	0.00612171	0.0555753	0.0489578	-0.0281416	-0.0983156	0.00237513	0.00535453	-0.0277366	0.125671	0.138926	0.0534473	-0.00885654	-0.122949	0.0683873	0.223318	0.0319696	-0.0855605	RPL15
ENSG00000089818	grey	-0.0880461	-0.00509733	-0.102283	-0.0189182	0.0563938	0.0188061	-0.0207463	0.0229632	-0.0774411	-0.0145466	0.00558086	-0.0878408	-0.0318406	-0.0618132	0.00259782	0.0155486	-0.0878324	-0.0217567	0.0251336	0.013	NECAP1
ENSG00000089820	grey	0.040342	0.0808641	0.148347	0.0256562	-0.0609872	0.0947227	-0.0182279	-0.00754444	-0.00171422	0.0653607	0.0155666	0.0633763	0.0525521	0.0540676	-0.0257684	0.0019023	-0.00310427	-0.0150568	-0.0108969	-0.0192992	ARHGAP4
ENSG00000089847	grey	-0.0609704	-0.0175903	0.0991685	-0.0487988	-0.022943	0.0694231	0.150996	0.108542	0.206328	0.10786	0.071966	0.0218267	0.0408346	-0.0370766	0.0906971	0.16839	-0.080053	0.122284	0.0225161	0.125642	ANKRD24
ENSG00000099139	CD8T4	-0.138065	-0.00815861	0.0406614	0.252602	-0.0441773	-0.198482	0.0416089	0.193042	0.0603176	0.178965	-0.184047	0.0319403	-0.0321788	0.114248	-0.067667	-0.019829	-0.151074	0.0987257	0.125378	0.0149529	PCSK5
ENSG00000089902	grey	-0.0174591	0.00510366	-0.0333301	-0.00995106	0.100138	-0.0215523	0.0221428	0.0733211	0.0645162	0.0490566	0.0911011	-0.0502851	0.168147	-0.035926	0.040364	-0.055118	-0.0201588	0.143314	0.0587093	0.0479954	RCOR1
ENSG00000089916	grey	0.119729	0.0944054	-0.059556	0.0196836	0.0350067	0.0698983	0.126347	0.00637354	0.0697951	0.0708969	0.0241124	-0.0207079	0.146807	0.136034	0.0518031	-0.0949718	0.102778	0.0850282	0.0399705	-0.0282274	GPATCH2L
ENSG00000090006	grey	-0.00874933	0.0602019	0.0343308	0.0250276	0.00263205	0.0133717	0.0596502	-0.0981342	-0.0193097	0.00982414	0.00357927	0.0632966	-0.03367	-0.0527946	-0.0654941	-0.0236944	0.0361142	0.0884954	0.0346585	0.0921234	LTBP4
ENSG00000090020	CD8T9	-0.0268628	-0.0119837	0.0961353	0.0417017	-0.0294365	0.0479205	0.0488271	0.077125	0.0652374	0.23202	-0.0145901	0.081225	-0.046301	0.15477	-0.0185408	-0.00628178	-0.0595484	-0.0381396	0.00162947	-0.0213877	SLC9A1
ENSG00000090054	grey	0.00511452	-0.069574	0.0467497	0.0427979	0.00969585	0.0450764	0.0762824	0.131026	0.182716	0.0597062	0.0608682	-0.0158689	-0.0159728	0.0957425	0.035244	0.0888587	0.0926588	0.0760079	0.0486073	0.171699	SPTLC1
ENSG00000090060	CD8T15	0.0719287	0.0170008	0.123098	0.0429592	-0.109247	0.0891126	-0.0260804	0.154528	0.178387	-0.0685509	0.104626	0.10466	-0.0127007	0.176021	0.124675	0.265071	0.211241	-0.0433359	-0.0683444	0.0856488	PAPOLA
ENSG00000155926	CD8T4	-0.0766796	0.0154955	0.217412	0.252351	-0.0670293	0.0043834	-0.00504769	0.0517148	0.0498286	0.0500387	-0.139851	0.052985	-0.111543	0.0855692	-0.102926	-0.0117709	-0.0350409	-0.0884912	0.0368928	0.0224165	SLA
ENSG00000090097	grey	-0.0122341	0.0595357	0.0422983	0.0322161	0.000500506	-0.00514012	0.0189056	-0.0283264	-0.0456787	0.0190757	-0.151693	-0.0246407	-0.129739	-0.0577633	-0.0668158	0.019655	-0.08242	-0.0235486	0.104175	0.100685	PCBP4
ENSG00000090104	CD8T10	0.279078	0.114408	-0.229448	-0.278566	0.350735	0.105554	-0.0745125	-0.265992	-0.140976	-0.149747	0.321469	-0.156669	0.348527	-0.143797	-0.00853664	-0.208299	-0.00991666	-0.0042242	-0.0509422	-0.318676	RGS1
ENSG00000186468	CD8T2	0.245572	0.498034	-0.0303565	-0.0915259	0.0633555	0.0660489	-0.117211	-0.147759	-0.0412794	0.0216016	-0.00570793	0.170796	0.116371	0.027368	0.0972706	-0.143738	-0.000532616	0.060177	-0.0254867	-0.103514	RPS23
ENSG00000145425	CD8T2	0.357056	0.497712	-0.0375692	-0.00976649	0.0787178	0.0676435	-0.0122587	-0.11416	-0.0354323	-0.0610164	-0.0221346	0.107049	0.164622	-0.0170787	-0.0770809	-0.170278	0.0514822	0.088571	0.155495	-0.0931435	RPS3A
ENSG00000090273	grey	-0.0257443	-0.0620904	0.0178687	-0.0579214	-0.125805	0.0548478	0.0711809	0.209183	0.164372	0.0405895	0.11192	-0.0217859	0.0181005	0.0667655	0.00715524	0.191862	0.0987306	0.0167936	-0.0785085	0.0112875	NUDC
ENSG00000090316	CD8T16	0.0805539	0.00198098	0.105236	-0.109045	-0.0704141	0.0500979	0.0220906	-0.0295916	0.0930139	0.0392676	0.0265355	0.0588161	-0.00798957	0.0498637	-0.00868395	0.0324095	0.124506	0.004713	-0.11459	0.0123348	MAEA
ENSG00000090372	grey	0.0182244	0.0206404	-0.0152328	-0.0265446	-0.0620631	0.0271539	-0.0508617	0.0499752	-0.0134891	-0.0517264	-0.00814147	-0.0262202	-0.0521553	-0.0655413	-0.0334986	0.0662026	0.0967038	-0.067913	-0.0646984	0.0307612	STRN4
ENSG00000090376	grey	0.00509055	0.00578395	-0.0128244	-0.0884417	-0.0265607	0.0795148	0.342347	0.0322768	-0.111564	0.114124	0.0937432	-0.0571335	0.03502	-0.106151	-0.0467747	0.0819326	-0.0272938	-0.0555899	0.0493489	-0.0566111	IRAK3
ENSG00000090470	grey	0.112558	0.122623	-0.0364072	0.101474	0.0493191	-0.0120874	0.0694613	0.0103411	-0.0758576	-0.000974692	-0.0471983	0.0640645	-0.012011	0.0835571	0.0643593	-0.00740706	0.101096	-0.0273264	-0.0299219	-0.0566089	PDCD7
ENSG00000090487	grey	0.00940112	0.12331	0.161641	-0.00815901	-0.108673	0.0283564	0.0291178	-0.0270792	-0.00958702	0.171504	-0.0400982	0.255775	-0.0242152	0.0878442	0.0768006	-0.0441294	0.0540625	-0.0108542	-0.00402965	0.0680358	SPG21
ENSG00000090520	grey	-0.0888418	-0.0492373	0.0207796	0.0772938	-0.0216878	-0.0454932	0.0224338	0.0951184	-0.0206973	-0.0290769	-0.137514	-0.135249	0.00164967	-0.0463846	-0.0964229	0.0638831	-0.093056	-0.0238192	-0.0568219	0.00501342	DNAJB11
ENSG00000090554	CD8T10	0.101019	0.0949268	-0.101232	-0.112432	0.0332052	0.0315641	-0.0116466	-0.0846174	-0.0943044	-0.0561101	0.0408445	0.0266495	0.0913714	0.0398832	-0.0231883	0.00982017	0.111967	0.0334608	-0.00137293	-0.066156	FLT3LG
ENSG00000090565	grey	0.00319867	-0.0969459	-0.0817429	-0.0742626	0.0706754	0.060673	-0.0145896	-0.0128258	0.0295631	-0.00608617	0.0971245	-0.0587749	0.015684	-0.0972575	-0.0131394	0.0140121	0.107467	-0.0947748	0.0392769	0.0724981	RAB11FIP3
ENSG00000090581	grey	0.0146886	-0.00459383	0.0932942	-0.000921188	-0.0065269	0.0558656	0.0980661	0.0865094	0.0620734	0.0486847	0.0753396	0.0240025	0.0668982	-0.0478082	-0.0376116	0.125069	0.0305972	-0.0410189	0.0491615	0.0440157	GNPTG
ENSG00000090612	grey	0.128703	0.0792215	-0.00646756	0.0678034	0.00478448	-0.00317765	-0.00430058	-0.0111705	0.0429106	-0.0409997	0.00333626	0.161018	-0.0214669	0.100718	0.00903051	-0.0416203	0.0963479	-0.0123393	0.0626209	-0.0407078	ZNF268
ENSG00000090615	CD8T15	-0.0252372	-0.0328859	0.178797	0.0307666	-0.0111394	-0.00965471	0.00940119	0.115184	0.096546	-0.0742207	0.00858462	0.0102818	0.00826499	-0.00625412	-0.0115991	0.226002	0.0521216	-0.0328065	0.015669	0.0988172	GOLGA3
ENSG00000090621	CD8T12	0.122668	0.090923	-0.0791735	-0.0285757	0.0743137	0.0809619	-0.0578128	-0.0366456	-0.0424488	0.0241849	0.0178392	-0.00668913	0.104126	0.0202413	-0.00047885	-0.10253	0.00205415	0.0829798	-0.0675135	-0.173938	PABPC4
ENSG00000090661	grey	-0.0777868	-0.0732359	0.0604217	0.0353655	-0.0727057	0.0510683	0.194799	0.153091	0.150286	0.107711	0.00151223	-0.0124421	-0.0586121	0.0607273	0.0560199	0.0427772	0.0335769	0.0925539	0.0578811	0.128189	CERS4
ENSG00000090686	CD8T12	0.033848	-0.0382563	0.00659794	-0.0720484	0.116753	0.039552	0.0185568	0.0293432	-0.0448538	0.0497345	0.143289	-0.0435724	0.129776	-0.0526921	0.0334193	0.064076	0.0198656	0.0176806	0.0322556	-0.0843127	USP48
ENSG00000221983	CD8T2	0.264366	0.496087	-0.017609	-0.0143504	0.0233118	0.155832	-0.0229072	-0.00884157	0.0732278	0.0358705	0.0268352	0.162889	0.175944	0.0393501	0.0376992	-0.072423	0.0399577	0.142255	0.0186252	-0.0614311	UBA52
ENSG00000090861	CD8T6	0.0170801	0.0510646	0.0104953	0.0230688	0.0290423	0.098043	-0.00272945	-0.0630481	-0.000638408	0.055507	0.0325699	0.0740856	-0.00350562	0.00456227	0.0176629	-0.00129573	0.0647076	-0.0642692	0.0221868	-0.0260999	AARS1
ENSG00000090863	CD8T13	-0.0538427	0.0371187	-0.0111136	-0.0651562	-0.0333533	0.0521097	0.0611625	0.0263458	-0.00269064	0.125866	0.0437541	0.0342438	0.000121008	0.0562201	0.0521634	0.00974507	0.108049	0.0487695	-0.127467	0.0193782	GLG1
ENSG00000090905	grey	0.05387	0.0418761	0.110076	0.0497622	-0.00249398	0.12824	0.108034	0.0547961	0.0224546	0.100077	0.0194652	0.16137	0.0921488	0.0911842	0.0756624	0.0860315	0.129716	-0.00939573	-0.0157025	-0.0084014	TNRC6A
ENSG00000090975	CD8T17	-0.0564657	-0.0326884	0.0402427	-0.00668063	-0.0505408	-0.0856737	0.0143322	0.00402621	-0.0135613	-0.00399379	-0.0580592	-0.0380106	-0.0460281	0.0331966	-0.105878	-0.0547119	0.00945977	0.0405109	-0.0763239	0.0295632	PITPNM2
ENSG00000090989	CD8T12	0.0808735	0.0709626	-0.0296128	-0.0403225	-0.0265844	-0.00389603	0.0429988	-0.0745146	-0.105702	0.0172855	0.0275177	0.017667	0.150152	-0.0795746	-0.0521103	0.0234218	-0.118275	-0.0448625	0.042316	-0.115372	EXOC1
ENSG00000091009	CD8T1	0.176553	0.0176666	-0.129603	-0.114431	0.119387	-0.0437938	-0.00221951	-0.0323348	-0.0265523	-0.0165222	0.126571	-0.0290551	0.134736	0.1365	0.104261	-0.0964766	0.164629	0.053002	-0.093481	-0.0591796	RBM27
ENSG00000091039	grey	0.031718	-0.0363654	-0.0485062	0.0844786	0.0464544	0.0387693	-0.137095	-0.0567861	-0.139704	-0.0165479	-0.0969539	-0.0458455	-0.0583875	0.0539359	-0.138017	-0.106582	-0.0373686	-0.144804	0.00721979	-0.134966	OSBPL8
ENSG00000091073	grey	0.0765758	0.119221	-0.0203425	0.0264547	0.0761768	0.0258232	-0.046949	0.0176261	0.00772507	-0.0448712	0.0145236	-0.05026	0.0648448	-0.0229231	-0.0140383	0.0313898	0.00208109	0.0074576	0.0532699	-0.122837	DTX2
ENSG00000091127	grey	-0.0354354	-0.0338647	0.163527	0.0898477	-0.0686955	-0.124937	0.0451572	0.0591312	0.0976372	0.0253759	-0.00234991	0.00356509	-0.00728769	0.0724963	-0.0285536	0.0750682	0.0165585	0.0672223	-0.0446145	0.0770934	PUS7
ENSG00000091129	grey	-0.125566	-0.146993	0.0461156	-0.0187149	-0.0379895	-0.00589368	0.013992	-0.0194637	0.123119	-0.00290788	-0.0221659	-0.00625039	-0.130324	-0.0810234	0.00839127	0.0578929	-0.0285068	0.0200944	0.00668631	0.0146611	NRCAM
ENSG00000091140	grey	-0.010759	-0.0926259	-0.0484161	0.034598	0.0565073	-0.0426077	0.0224905	0.0526421	-0.0421564	0.0762275	0.0531908	-0.0284248	0.0460978	0.00109933	-0.0487675	0.0126306	-0.0577539	-0.0316655	-0.0159289	0.0209977	DLD
ENSG00000091157	grey	-0.0165016	-0.111691	0.09115	0.0133878	0.0227875	0.0412689	0.0829955	0.190177	0.153167	0.0695696	0.100221	0.0168018	0.0457628	0.123663	0.0836916	0.0367313	0.131858	0.0853401	-0.0335236	0.0727757	WDR7
ENSG00000091164	grey	-0.0452537	0.0162967	0.0616949	0.0625403	-0.0339349	0.0499549	0.00781934	-0.0247894	0.147413	0.0703699	-0.00438633	0.0737962	0.0925455	0.0754752	0.00766594	0.0497316	0.0947282	0.0111319	0.00924258	0.08718	TXNL1
ENSG00000091317	grey	-0.061904	0.0756886	0.0136879	0.0268424	0.0390854	-0.0816788	0.00867264	-0.0311495	0.0854924	0.141917	-0.0556849	0.00362767	0.00744623	0.0921966	-0.0158536	-0.0151425	0.00367596	0.173439	0.0123539	-0.0265933	CMTM6
ENSG00000091409	CD8T18	-0.0320583	-0.0283554	-0.156693	0.0337863	0.0739937	-0.131889	-0.132488	0.0975936	-0.0225458	-0.169858	-0.127044	-0.0886646	-0.0592361	-0.12179	-0.117835	0.0260368	-0.190443	0.0156001	0.22833	0.0150687	ITGA6
ENSG00000091428	grey	0.0349007	-0.027506	-0.0135806	-0.0404893	-0.0226383	0.0832831	0.0812636	-0.0590205	-0.0214802	0.207433	-0.00784477	-0.0222718	0.102884	0.00257741	0.0152924	-0.0446864	-0.0291669	0.105336	-0.0945914	0.0354576	RAPGEF4
ENSG00000091436	CD8T10	0.0460903	-0.0433858	0.0625928	-0.0446482	0.0882901	-0.0207446	0.0252537	0.133807	0.0652283	-0.0300465	0.218036	0.0108908	0.0808215	0.172468	0.0528212	0.0892223	0.135325	0.17469	0.0537346	-0.023077	MAP3K20
ENSG00000087269	CD8T4	-0.102326	0.0318752	0.0950726	0.252094	-0.0233603	-0.0202284	0.0977607	0.169078	0.134104	0.0698059	-0.107601	0.14681	0.077249	0.047663	0.0836904	0.0781962	-0.0707303	0.0283991	0.125869	0.22755	NOP14
ENSG00000091490	grey	-0.0541894	-0.0569087	-0.0204316	0.0491962	0.0374599	0.0721467	-0.0037649	0.00811627	0.00384129	0.00361136	-0.0115203	0.00726785	0.0157784	-0.0229382	0.0274924	0.0712666	-0.0206875	-0.0489408	0.0396797	0.0699044	SEL1L3
ENSG00000198888	CD8T2	0.272922	0.494143	0.0186494	0.0567364	0.00653051	0.134326	-0.0385407	-0.0972554	-0.0685482	0.0449338	-0.0586633	0.328361	0.0957801	0.106404	0.0363473	-0.0938039	0.0596104	0.110452	0.0868792	-0.00247901	ND1
ENSG00000155903	CD8T4	-0.137682	-0.027966	0.110675	0.25194	-0.0812174	-0.103641	-0.0733022	0.0369929	0.0381257	-0.0104772	-0.241268	0.12727	-0.210071	0.0787304	-0.151453	0.0312159	-0.0676984	-0.131382	0.171885	0.130651	RASA2
ENSG00000091592	grey	-0.0325363	0.0569019	-0.00296746	-0.0557006	0.0729842	-0.021847	0.0180306	-0.0748095	-0.0359013	0.0492088	0.0460138	-0.060074	0.012244	-0.10133	-0.0670164	-0.0775724	-0.136486	0.0302628	0.126077	-0.0148468	NLRP1
ENSG00000091640	CD8T17	0.0188083	-0.0274264	0.0113384	-0.0361643	0.0273121	-0.0676304	0.0889427	0.0310414	0.152575	0.0824782	0.0846955	-0.0176259	0.0267791	0.0265507	0.0764138	-0.0347263	-0.00131925	0.22842	0.0442086	-0.0114507	SPAG7
ENSG00000091732	grey	-0.039457	-0.10051	0.0304811	0.0391842	-0.0501273	0.044031	-0.0671415	0.0475391	-0.0422427	-0.0160722	-0.0399883	-0.0107526	-0.148217	-0.000629772	-0.0365897	0.111957	0.0741632	-0.0955182	0.0127619	0.0555453	ZC3HC1
ENSG00000091831	CD8T6	0.0643786	0.0241665	-0.0517953	-0.243294	0.0977133	0.164115	0.00251869	-0.0429975	-0.0337868	0.0145636	0.193909	-0.0151226	0.154869	-0.052989	0.123099	0.0083582	0.0693284	-0.0418552	-0.0485523	-0.096609	ESR1
ENSG00000091844	grey	0.0317729	-0.0247471	-0.000291526	0.0808971	-0.00203824	0.023032	0.0135999	0.0578963	0.0498292	-0.00551625	0.0684951	0.0415231	0.10698	0.0505707	-0.00643198	0.0319044	0.0714922	0.0406636	0.0297214	0.068624	RGS17
ENSG00000091879	grey	0.0397582	0.0202004	-0.0428724	-0.0771551	0.0263053	-0.00261659	-0.0385527	-0.0906679	-0.104706	-0.029572	-0.0211823	0.0169543	-0.0266844	0.0327035	0.0191502	-0.0156502	-0.0524106	0.0155406	0.055296	-0.0856133	ANGPT2
ENSG00000205542	CD8T2	0.387361	0.492177	-0.0209421	-0.233933	0.13653	0.268732	-0.0426919	-0.252491	-0.0916104	0.00816018	0.202139	0.073632	0.355218	-0.0827589	0.0486013	-0.141255	0.0581075	0.0732313	-0.0655934	-0.188224	TMSB4X
ENSG00000092020	CD8T1	0.147668	0.145159	-0.0137313	-0.00783084	0.00612133	0.0709148	-0.0372744	-0.0434161	-0.0585564	-0.0197676	-0.0341414	0.113978	0.00449304	0.0772995	-0.00795972	0.00264316	0.238905	-0.00256836	0.00231935	-0.0407897	PPP2R3C
ENSG00000092036	grey	0.00568989	-0.0177149	0.0207528	0.0187296	0.0304352	-0.00224017	-0.0534276	0.00979767	-0.00751675	-0.0265959	-0.0209314	0.000415453	0.040147	-0.037744	-0.0164782	0.0721784	0.0145576	-0.0270757	0.111165	-0.0419105	HAUS4
ENSG00000164574	CD8T4	-0.0327183	0.120151	0.0986533	0.249996	0.031604	-0.130884	-0.00757889	0.11366	0.181096	0.0709902	-0.150639	0.113683	-0.0351566	0.10223	-0.0235303	0.0397161	-0.144562	0.163453	0.024821	0.115404	GALNT10
ENSG00000092094	CD8T18	0.0664811	0.12665	-0.0593296	-0.036313	0.0751924	0.0345109	-0.0384197	0.00316835	-0.0805223	-0.122813	0.0258803	0.0552161	-0.00348435	-0.122801	-0.00691806	-0.00922829	-0.102736	-0.0264669	0.135697	-0.0700743	OSGEP
ENSG00000092096	CD8T10	-0.00231338	0.0013046	-0.0239808	-0.12218	-0.00719204	-0.0149218	0.0289088	-0.0292604	0.0238252	0.0470875	0.0846399	-0.0314048	0.0152508	-0.128828	0.00199244	0.0964502	-0.0313788	0.0222565	-0.0511239	-0.0489139	SLC22A17
ENSG00000092098	grey	0.0183087	-0.0448007	-0.0435488	-0.0936778	0.0383447	-0.0491712	-0.0229688	-0.0663286	-0.0291463	-0.0700905	0.0182332	0.0511474	-0.0482315	-0.0497953	0.0170932	-0.0702401	-0.00479427	-0.0400335	0.0347917	-0.068523	RNF31
ENSG00000092108	CD8T10	-0.0494747	-0.0678488	0.0822858	-0.0210333	-0.0134866	0.0583193	0.074345	-0.00246256	0.0577817	-0.0139485	0.0716346	0.00509719	0.0552529	-0.0237581	-0.0609563	0.135576	0.0358444	0.00155324	0.0931034	0.000357885	SCFD1
ENSG00000092140	grey	-0.00459251	0.0696456	0.161573	0.0526364	-0.0177477	0.122752	0.0429196	0.0922694	0.0624465	0.059169	-0.0278475	0.203039	-0.00658154	0.128719	0.0856905	0.121806	0.0540071	-0.0407628	0.0558194	0.0769945	G2E3
ENSG00000092148	CD8T16	0.0544418	0.0388542	-0.038913	-0.0121574	0.101303	0.0706146	0.140528	0.0994181	-0.0263483	-0.024063	0.0727568	-0.0693326	0.175361	0.0215459	0.0522322	0.0426406	0.173661	-0.0146268	0.0153302	-0.00500809	HECTD1
ENSG00000092199	CD8T6	0.0435302	-0.0120119	0.0188898	-0.0512771	0.0300343	0.150999	-0.0271465	-0.0262376	-0.0035236	0.0117737	0.0515132	0.0723024	0.0609875	0.0839393	-0.0666545	0.0648403	0.105756	-0.00188888	0.0147785	-0.0173744	HNRNPC
ENSG00000142676	CD8T2	0.287747	0.490766	-0.00222863	0.0390582	0.0568679	0.169522	0.0632654	-0.099628	-0.1264	0.0278914	-0.0571251	0.153232	0.133816	0.094019	-0.0682286	-0.077638	0.127761	0.0152412	0.0876125	-0.111284	RPL11
ENSG00000092203	grey	0.0756834	0.035742	0.129635	0.0392853	-0.00225169	0.0950881	0.0288255	0.0612358	0.0595989	0.0266957	0.0276348	0.0830893	0.0527998	-0.00537126	-0.0117178	-0.0087626	-0.0386648	-0.0101277	-0.00964406	0.0693172	TOX4
ENSG00000092439	CD8T6	0.0143038	0.0111949	0.0848111	0.0920199	0.0820348	0.0818314	0.0531578	0.0485281	-0.0443235	0.0397148	0.0294332	0.0548275	0.00660837	-0.00103685	-0.00411421	0.0374327	0.150279	-0.0837975	-0.0184191	0.13083	TRPM7
ENSG00000092445	grey	0.0390342	-0.06092	0.0460703	0.0104746	0.0450052	0.0341127	0.00980119	0.05153	0.0269026	-0.0324789	0.0676531	0.0088061	-0.0334907	0.00651801	-0.0048455	0.127887	0.0602	0.0807506	0.0624888	0.11065	TYRO3
ENSG00000092470	grey	-0.0702497	-0.152137	0.0561588	0.0104648	-0.026616	-0.0262443	0.0144421	0.054804	-0.0403806	0.0233926	0.0644056	-0.0793295	-0.0325707	-0.0631964	0.0434648	0.0477462	0.000721297	-0.0937363	-0.0110028	0.0576419	WDR76
ENSG00000092529	grey	0.0578474	0.0218493	-0.0122903	-0.0132117	-0.105637	0.0493433	0.0246983	-0.0178349	0.0232192	0.0411674	-0.0436288	0.00627198	-0.0357852	0.0637802	0.0185424	-0.0464827	0.134854	0.0707326	-0.0920229	-0.0690715	CAPN3
ENSG00000092531	CD8T10	-0.0334118	0.00892499	-0.0241887	-0.0298688	-0.00564962	0.00937768	-0.0390697	-0.00901638	0.0791261	-0.0756247	0.0284153	0.0715078	0.0472946	-0.0512806	0.0708478	0.0260953	0.0517584	0.0246612	0.114068	0.074656	SNAP23
ENSG00000092820	grey	0.00210956	0.0327633	-0.0394152	0.192561	0.0124465	-0.183919	0.00660307	0.167574	-0.0573773	-0.0449119	-0.108939	0.123997	-0.030983	-0.0330137	-0.0205833	0.0320952	-0.0659189	0.146895	0.15604	0.104859	EZR
ENSG00000087086	CD8T2	0.286026	0.489949	-0.00790841	-0.0461699	0.0815633	0.15696	0.0896517	-0.079751	0.0140369	0.139917	0.0756499	0.123352	0.262269	-0.0256319	0.0198069	-0.112475	0.0936424	0.127018	0.0676744	-0.064915	FTL
ENSG00000092847	grey	0.0402002	0.0344863	0.0263822	-0.0140515	-0.0530117	0.0594055	0.128523	0.101238	-0.0427974	0.0303282	0.0104996	-0.0375068	-0.0123935	-0.0470634	0.00997081	0.088986	0.106063	-0.0730185	0.0994617	0.0643955	AGO1
ENSG00000092871	grey	-0.0470308	-0.0764779	0.114817	0.0683389	0.041683	0.0169223	-0.0162272	0.0245095	0.068814	-0.0535381	0.0627371	0.0316107	0.0153992	0.0548805	-0.0507168	0.0779388	0.0346942	0.0748538	0.106085	-0.0941052	RFFL
ENSG00000092929	CD8T10	0.0650632	0.00759888	0.056181	0.00642382	-0.0107767	0.0468704	0.100586	0.0603987	0.13182	0.0411719	0.0928816	0.103386	0.0843102	0.0694219	0.0549969	0.0997476	0.0915769	-0.0213742	0.0410032	0.0645525	UNC13D
ENSG00000092931	CD8T10	0.0492644	-0.0558614	0.0356306	-0.114592	-0.00879242	0.0341416	0.171705	0.0781812	0.0130127	0.0779942	0.235817	-0.0143695	0.0737796	0.0404281	0.073505	0.108058	0.159175	0.112402	-0.171585	-0.0319098	MFSD11
ENSG00000092964	CD8T17	0.130822	0.0825523	-0.0714411	-0.0222672	0.0487332	-0.0855991	-0.0262819	0.0963552	0.132255	-0.0289399	-0.0125962	-0.0352897	0.00547723	0.0712162	0.0219412	-0.0885497	0.0548694	0.246173	0.0102773	0.0268466	DPYSL2
ENSG00000092978	grey	0.158759	0.0609604	-0.00980411	-0.0584357	0.0479563	0.0285896	-0.0352455	0.0281813	-0.000606934	-0.11917	0.0945922	-0.0479607	0.0689461	0.025848	0.00481222	0.0669999	0.0551271	0.00555527	0.0247468	-0.0544945	GPATCH2
ENSG00000093000	grey	0.0550696	-0.01852	0.0185184	-0.1063	-0.144553	0.00590131	0.0283219	0.0148471	-0.0505403	0.041903	0.0645806	0.0258547	-0.0427831	0.0648452	0.0442272	0.0258981	0.0961113	0.0489413	-0.0536109	0.00493075	NUP50
ENSG00000093010	grey	-0.0568764	-0.0954586	0.0528894	-0.0143409	-0.183522	0.0356985	0.0248801	-0.0481143	0.0826016	0.032601	-0.00619211	0.0938171	0.00805332	-0.0249969	0.0217762	0.0244905	0.00691515	-0.0177725	-0.122795	0.09787	COMT
ENSG00000093072	grey	-0.0360122	-0.0699686	-0.0128179	0.0242585	-0.0896044	0.0683729	0.0630766	0.0660105	0.0959984	0.0856771	-0.0226014	0.115964	-0.0575662	0.0239956	0.0659822	0.0119606	0.08283	-0.01351	0.0616559	0.112453	ADA2
ENSG00000093144	CD8T13	0.0703282	0.0189763	-0.0225044	0.0641717	0.0257008	-0.0150224	-0.040248	0.115824	-0.00430302	0.026161	-0.00709145	-0.0371359	0.0262504	0.186682	0.00500553	-0.0012067	0.0744006	0.000738762	0.00626623	-0.100495	ECHDC1
ENSG00000093167	CD8T18	-0.152973	-0.122216	0.0267029	0.0941924	0.0249134	-0.0122855	0.0126178	0.091924	-0.0401456	-0.0376708	-0.109568	0.0201046	-0.134182	-0.00300119	-0.150669	0.108629	-0.074027	-0.113032	0.131281	0.142568	LRRFIP2
ENSG00000142937	CD8T2	0.307765	0.488339	-0.0617481	0.0588961	0.0925346	0.0414129	-0.0263756	-0.0104807	-0.0815215	0.00971427	-0.0338458	0.211836	0.120404	0.097219	0.0461721	-0.0603327	0.142698	0.145009	0.118553	-0.0583292	RPS8
ENSG00000241525	CD8T4	-0.0309675	0.0729775	0.0965075	0.248773	-0.105759	-0.0649111	0.0750086	0.127526	0.0749054	0.213631	-0.111136	0.161679	0.0207579	0.210538	-0.0836627	0.0343336	-0.0671357	0.0868783	0.0339192	0.189532	LOC105371430
ENSG00000094841	grey	0.0532095	0.0365418	0.0141795	0.050558	-0.0283961	-0.085754	-0.0947389	0.062798	0.0428488	-0.0775137	0.0276627	0.0960662	-0.0673075	0.142021	-0.0276737	0.0277476	0.176747	0.0607896	0.0969538	-0.0790713	UPRT
ENSG00000094880	grey	-0.120758	-0.00695529	-0.0262032	0.0654025	-0.0179592	-0.10723	-0.0221798	0.0789742	0.0434101	-0.0276971	-0.0600463	-0.066139	-0.101149	-0.1097	-0.00663916	0.000365114	-0.125811	0.0357127	-0.0392072	0.0465145	CDC23
ENSG00000182568	CD8T4	0.00184079	0.0782809	0.136537	0.248062	0.0524185	-0.0019477	-0.0118866	0.0817638	0.0795636	-0.0308557	-0.11464	0.0965586	-0.0151292	0.0863873	-0.149694	0.0716412	0.00410326	-0.0120548	0.214823	0.0820687	SATB1
ENSG00000094916	CD8T3	-0.0276641	-0.043715	0.237343	0.155198	-0.211648	0.0241971	0.0549348	0.09655	-0.00243264	0.0974923	-0.0680435	0.13566	-0.092694	0.03879	-0.0278707	0.102714	0.0859141	-0.0645243	-0.00473529	0.155311	CBX5
ENSG00000094975	grey	-0.0545932	-0.0390571	0.0967579	0.0385655	-0.0669391	0.0361571	0.0209108	0.0403742	0.10766	0.0675777	0.0545084	0.0863356	-0.0284247	0.017571	0.0963956	0.0353505	0.0879165	-0.0178235	0.0665464	0.142825	SUCO
ENSG00000095002	grey	-0.0262281	0.0418424	0.101501	-0.0119538	-0.0103066	0.11386	0.106748	0.0778876	0.0582015	0.00189964	0.130678	0.00581825	0.0966495	-0.0175601	0.0255446	0.103727	-0.00751813	-0.0607951	0.0905558	0.105236	MSH2
ENSG00000095015	grey	0.00174804	-0.0224222	-0.0212039	0.11397	-0.0352729	0.0912105	-0.0914991	0.0507235	0.0926708	-0.0960232	-0.122096	0.0685421	-0.0183905	0.108753	0.0101406	0.0226248	0.0269954	-0.0703989	-0.013084	0.0749997	MAP3K1
ENSG00000095059	grey	0.0858516	0.17858	-0.0790833	0.0435183	0.0150128	0.0136315	-0.0569812	-0.0321668	-0.0130379	0.103571	-0.0408807	0.0389118	0.0898242	-0.0465932	-0.00956489	-0.04077	-0.0998649	-0.040166	0.0685362	0.0066669	DHPS
ENSG00000095066	grey	-0.0381366	-0.0639489	0.0192898	0.116672	-0.014207	0.0127421	0.133821	0.0817594	0.00549487	0.0986186	0.0865059	0.0322411	0.0394244	0.0411446	0.0774636	0.0207919	-0.000102633	0.0729007	-0.030505	0.149801	HOOK2
ENSG00000095139	grey	0.101531	0.0942985	0.104076	-0.00354855	-0.0718678	0.11107	0.0869823	0.0114317	0.0433339	0.0768045	0.0657027	0.0456519	0.137662	0.015307	0.150368	0.0831911	0.118286	0.0308371	-0.0421426	0.0383872	ARCN1
ENSG00000095203	grey	-0.0514563	-0.0840655	-0.0164091	0.00651274	-0.016188	-0.0277401	0.0780462	0.0714168	0.100281	-0.025301	-0.00548258	-0.0557837	0.0851541	-0.0837321	-0.0565536	-0.0185575	-0.114634	0.0942791	0.0243394	0.0331629	EPB41L4B
ENSG00000095209	CD8T13	0.0262068	-0.0475437	0.0210146	0.0613247	7.00666e-05	0.00155428	-0.0225055	0.171509	0.135583	0.0104941	-0.00948873	-0.102102	-0.047697	0.244583	0.0695878	-0.0636951	0.0553859	0.0586807	-0.0897587	-0.0139751	TMEM38B
ENSG00000095261	CD8T6	0.0757894	0.137146	-0.039494	-0.0653579	0.00153276	0.0907491	-0.0520998	-0.0788889	0.00855399	0.0112544	0.0380924	0.0439113	0.0479364	-0.0223247	0.0469064	-0.0564911	0.00990504	-0.0184749	-0.0211459	0.00658757	PSMD5
ENSG00000095319	CD8T16	0.10009	0.0583217	-0.0194916	-0.0889502	-0.0140147	0.0799329	0.0623923	-0.0263226	0.012863	-0.00345603	0.0714677	-0.038463	0.0473296	0.0103776	-0.00485066	-0.0479237	0.196009	0.0190771	-0.053812	-0.0784287	NUP188
ENSG00000095370	CD8T14	-0.00733715	-0.0740604	0.0749856	-0.0564222	-0.0482135	0.00313891	0.01932	-0.00894026	0.0543691	-0.0720044	0.0408293	-0.00336379	0.0176014	-0.0130077	0.122752	0.0460871	0.0674494	0.063452	-0.149702	-0.01541	SH2D3C
ENSG00000115165	CD8T4	-0.111229	-0.0905284	0.00714863	0.247878	0.0865414	-0.0690798	-0.0570038	0.0651988	0.0432761	0.0181121	-0.191228	-0.0190826	-0.0817349	0.00169095	-0.0594834	-0.103141	-0.126613	0.00720596	0.100162	0.10676	CYTIP
ENSG00000111266	CD8T4	0.0252564	0.16866	0.017494	0.247346	0.0729208	-0.0393608	-0.00770265	0.070803	-0.00600178	0.0525599	-0.184351	0.171164	-0.0236164	0.136181	-0.112624	-0.0478218	-0.073739	0.0348763	0.117954	0.0119617	DUSP16
ENSG00000095485	CD8T10	0.0639412	0.000617586	-0.038981	-0.110474	0.0394266	0.0753869	-0.0244185	-0.0222703	0.0784819	0.0160668	0.162654	0.030318	0.0245242	-0.0357359	0.0699602	-0.0430428	0.161409	0.044735	-0.0303555	0.0247441	CWF19L1
ENSG00000095564	CD8T13	0.105829	0.023859	-0.0220768	0.0348553	-0.0109794	-0.101844	0.0572829	0.0207467	0.116024	0.0930908	0.018725	0.0274893	0.0629784	0.125655	0.0131644	-0.104816	0.0618627	0.127781	0.0126825	-0.0726359	BTAF1
ENSG00000095574	CD8T1	0.169602	0.0690475	-0.0529503	-0.00101705	0.0108436	0.00252881	-0.0769484	0.0120892	-0.055976	-0.0530914	0.0841454	0.00241212	0.0413769	0.0161011	-0.00105431	-0.029868	0.0889081	0.0496057	-0.0116792	-0.076781	IKZF5
ENSG00000095637	CD8T7	-0.0670226	-0.01675	0.121046	0.0722576	-0.0849957	-0.151797	0.138482	0.268909	0.22155	0.122046	-0.00974675	0.0372322	-0.172786	0.0682089	0.038113	0.120445	-0.107214	0.170612	0.122028	0.215946	SORBS1
ENSG00000095787	CD8T10	-0.0334572	-0.0158575	-0.00328029	-0.0272587	0.117569	0.0142665	-0.0673751	0.078176	-0.0420768	-0.125763	0.0930017	-0.0209795	-0.00826778	0.0185201	0.113637	0.0954154	0.0453532	-0.0261594	-0.0212774	-0.0729025	WAC
ENSG00000095794	grey	-0.0340583	0.0116939	0.0163167	0.10578	0.196555	-0.0269251	-0.063531	-0.0730974	-0.12958	-0.0126622	-0.105938	-0.0292054	0.0116911	0.00936697	-0.0691088	-0.127012	-0.101066	-0.0854088	0.0848491	-0.140689	CREM
ENSG00000095906	grey	-0.034262	0.0961194	-0.0242551	0.0776251	-0.0764306	-0.0474936	-0.00194621	-0.0897106	-0.034637	0.08925	-0.115082	0.0321441	-0.0247366	0.012617	0.0121759	-0.0686434	-0.0216154	0.0327622	-0.0638696	0.0379339	NUBP2
ENSG00000095951	grey	0.033793	-0.0112152	0.00607928	-0.0418501	-0.0330358	0.0713624	0.0650311	0.00464897	0.0881604	0.0614764	0.0547785	-0.0281439	0.0360156	0.052622	0.0294988	0.055963	0.15598	0.067182	-0.129328	0.0024102	HIVEP1
ENSG00000170525	CD8T4	-0.135029	-0.110838	0.0327244	0.246611	0.0865311	-0.0750484	0.147699	0.138176	0.0736487	0.0648843	-0.0848067	0.0972534	-0.0224961	0.140917	-0.023953	0.110427	-0.0256884	0.000989562	0.0895806	0.187152	PFKFB3
ENSG00000096063	CD8T3	-0.0117641	-0.0301443	0.147661	0.022857	-0.00264208	0.0801672	0.0175897	0.0182197	0.0763472	0.050871	0.00520453	0.0616078	-0.0447769	0.0158711	-0.0100037	0.0887807	0.102762	0.00336948	0.0473543	0.00564468	SRPK1
ENSG00000096070	grey	-0.0583733	0.0150922	0.0181455	0.00484062	-0.0574157	-0.0408365	0.00976624	0.0432727	0.0421101	0.0490124	0.0661464	-0.00630089	0.0866333	0.00778152	0.165162	0.0562612	0.0211279	-0.0362576	-0.00105238	0.0728207	BRPF3
ENSG00000096093	CD8T1	0.0383961	0.0681801	-0.10655	0.0308818	0.0581765	0.0507624	0.0704621	-0.00214936	0.000395076	-0.0358735	0.00126237	0.0760756	0.0416483	0.0849872	0.011698	0.0722036	0.0378471	0.156956	0.0530079	-0.00909998	EFHC1
ENSG00000096384	grey	0.019731	0.101524	0.0373634	0.0897215	-0.152781	-0.0696423	-0.0104877	0.139062	0.0089585	0.10543	-0.133517	0.0657927	-0.0861777	0.0512536	0.0556569	0.0436663	-0.0407911	0.137951	-0.0545087	0.024151	HSP90AB1
ENSG00000096401	grey	0.045247	0.0572655	0.0411577	0.0228132	0.0495201	-0.00928975	-0.0653931	0.0529804	-0.010116	-0.0938108	0.0345841	0.0134255	0.0877566	0.067821	-0.0128577	-0.011133	0.0551014	-0.0184044	0.00523155	0.00473703	CDC5L
ENSG00000096433	CD8T14	0.0665649	0.103736	-0.00729085	-0.00914141	-0.0557458	-0.0188503	0.0865087	0.0428761	0.0284185	0.13682	0.0712185	0.0209804	0.0370736	0.041399	0.0410821	-0.0192796	0.0354495	0.0284923	-0.0169484	0.00416869	ITPR3
ENSG00000096654	CD8T1	0.147214	0.168895	-0.128355	-0.0693204	0.0879625	0.123391	-0.0643888	-0.111452	-0.0401832	-0.0334247	0.0608274	0.0633662	0.125988	-0.0289598	-0.0114231	-0.112386	0.0577842	-0.0258515	-0.0443284	-0.152415	ZNF184
ENSG00000096717	grey	0.104884	0.0256077	0.0687059	0.0460449	0.0937327	0.0165656	-0.0556088	0.130679	0.0115851	-0.0880861	-0.0176417	0.0328929	-0.0215113	0.107347	0.00717056	0.0633854	0.0619762	-0.010628	0.057937	-0.045813	SIRT1
ENSG00000096746	grey	0.0832784	-0.0330776	-0.0256496	0.0807418	0.186238	-0.0559172	0.0949999	0.177737	0.0784399	0.063938	0.0663544	-0.0441611	0.11357	0.0788575	0.0430432	0.0292755	0.0877782	0.101576	0.122487	0.0938263	HNRNPH3
ENSG00000096872	grey	-0.036858	0.00934224	0.198142	0.103525	-0.0621155	0.0528319	0.0609528	0.0130383	-0.0917864	-0.0383596	-0.0853683	0.113906	-0.047986	0.0813293	-0.103975	0.0214641	0.0614941	-0.150123	0.0414481	0.0503883	IFT74
ENSG00000096968	CD8T12	0.0489431	0.0224788	0.0130862	-0.154613	-0.019634	0.1261	0.111478	-0.0592162	0.0569916	0.0727303	0.166865	0.0762671	0.115983	0.0324618	0.0508212	0.0228978	0.123808	0.0957822	-0.0452807	-0.00651183	JAK2
ENSG00000096996	grey	-0.0968524	-0.00356241	0.123875	-0.078528	-0.096322	0.0836338	0.0630932	-0.0457926	-0.031699	0.21734	0.0306557	0.137601	-0.0136199	-0.0558263	0.00696181	0.0154932	0.00387726	-0.139914	-0.0445501	0.110893	IL12RB1
ENSG00000097007	CD8T18	-0.0258142	-0.0437076	-0.00404395	0.0788744	0.0586476	-0.152934	-0.0355509	0.0350047	-0.0227661	-0.106658	-0.0328245	-0.0564253	0.0312248	-0.0747307	-0.0872056	0.0399496	-0.0636731	0.0649774	0.0793816	0.0403116	ABL1
ENSG00000097021	grey	-0.0126103	-0.0488741	-0.00435794	-0.0594829	-0.0754873	-0.00199503	0.0686934	0.129985	0.0686662	0.0479504	0.0757351	0.0205943	0.0641544	-0.0352034	0.168538	0.0802419	-0.0221727	-0.0293639	-0.084859	0.095259	ACOT7
ENSG00000103222	CD8T4	-0.156138	-0.00905918	0.038809	0.242754	-0.0746228	-0.145509	-0.00863987	0.137466	0.043846	0.0118534	-0.2438	0.029569	-0.203486	-0.0471182	-0.0325928	0.0415162	-0.200568	-0.0173102	0.0945816	0.224614	ABCC1
ENSG00000097046	CD8T7	0.0300768	0.0968325	-0.124396	0.069792	0.0771628	-0.0897705	-0.0235878	0.0365773	0.0726823	-0.0436526	-0.0555912	-0.0984898	0.0166676	-0.0129963	-0.00131378	-0.0367127	-0.0782174	0.0772994	0.0422274	0.0550459	CDC7
ENSG00000084070	CD8T4	-0.023865	-0.0396193	0.0791062	0.242752	0.176219	-0.0992629	0.0123976	0.187769	0.0391732	0.0230151	-0.0814277	0.00109021	-0.0316534	0.050161	-0.0312922	0.0145528	-0.0372261	0.133986	0.138367	0.0249266	SMAP2
ENSG00000175387	CD8T4	-0.0807134	-0.00642415	0.158984	0.242386	-0.1696	-0.0354935	0.0721519	0.134011	-0.00351464	0.106066	-0.178302	0.124637	-0.0335761	0.189015	0.0360225	0.0438248	0.0433332	-0.098143	-0.0385671	0.0842109	SMAD2
ENSG00000099219	grey	-0.0481164	0.0397972	0.129612	0.114112	-0.0673065	0.0586136	0.0525283	0.0217295	0.0414018	0.00295135	-0.128738	0.137305	-0.0569161	0.0960268	0.0530238	0.0508498	0.0528819	-0.088854	0.00139892	0.0858341	ERMP1
ENSG00000112305	CD8T4	-0.119668	-0.11635	0.0157076	0.24228	0.0190552	-0.119219	-0.011911	0.122029	0.0146875	-0.0368575	-0.155351	-0.0400629	-0.00809995	0.0643155	-0.167455	0.0419308	-0.0701972	0.0187343	0.133569	0.147023	SMAP1
ENSG00000099256	grey	0.102497	0.0179727	-0.0477773	0.0348643	-0.0112739	-0.00294767	-0.0281172	0.0264203	-0.00419419	-0.04549	0.0287554	-0.0544112	0.0911288	0.0472773	-0.0188237	-0.0576466	-0.0539224	-0.0024145	-0.046344	-0.016824	PRTFDC1
ENSG00000099284	CD8T10	0.0631497	0.000288665	-0.00340426	-0.0869961	-0.00630369	0.0560417	0.0485351	-0.0326749	-0.0445501	0.038858	0.114729	-0.0285786	0.0381582	-0.0740651	0.0277119	-0.0160079	-0.0289747	0.0902321	-0.0363471	-0.0582507	MACROH2A2
ENSG00000099290	grey	0.053848	0.0407021	0.0465205	-0.0534972	0.102451	0.16285	-0.00718496	-0.0267113	0.0299208	0.0578391	0.113658	0.053103	0.0680561	0.00978884	0.046711	0.0104563	0.141989	-0.0313928	0.0247484	-0.0786215	WASHC2A
ENSG00000099308	grey	-0.0763934	-0.0406848	0.07137	0.00463229	-0.056442	0.0129693	-0.00989989	0.0706703	0.07419	0.00570976	-0.0245516	-0.0426689	-0.0950302	0.0173287	2.47727e-05	0.0825565	-0.035875	0.0297125	0.109721	0.0162331	MAST3
ENSG00000099326	CD8T7	-0.0586723	0.0073527	0.104064	0.0359294	-0.018215	-0.0110645	0.0536266	0.150567	0.0704372	0.0459345	-0.0170608	0.0198764	0.0387897	0.0851984	-0.00242226	0.0794555	-0.0597448	0.0624545	0.0807445	0.10432	MZF1
ENSG00000111666	CD8T4	-0.0453083	0.0500042	0.11156	0.241289	-0.0173825	-0.140495	-0.0301791	0.0557702	0.0126546	0.0153306	-0.179656	0.147876	-0.138105	0.127407	-0.103081	0.0374683	-0.0395946	0.0704026	0.106787	0.0227148	CHPT1
ENSG00000099337	grey	0.0173214	0.00472258	0.0871586	0.0874251	0.0541203	-0.0196395	-0.000201972	0.019352	0.0158036	-0.0750855	-0.00405317	-0.0978814	-0.00726089	-0.0837903	-0.0810015	0.0934738	-0.0636224	0.029638	0.142258	-0.0471594	KCNK6
ENSG00000099338	grey	-0.102565	-0.056072	-0.032644	0.00926283	-0.0157855	-0.0770435	0.0742726	0.0304217	0.100807	0.0927384	0.0049347	-0.0545397	0.067065	0.0950902	0.133197	-0.0286133	-0.00255902	0.0798318	-0.10001	-0.074625	CATSPERG
ENSG00000099341	CD8T6	0.0425389	0.0816681	0.0857885	-0.0592616	-0.0276958	0.0273712	-0.0255588	-0.106311	0.00174876	-0.00197642	0.0471266	0.0632666	-0.00339186	-0.0318397	-0.0231833	-0.0197938	-0.0394923	-0.0293432	-0.0712298	-0.0422443	PSMD8
ENSG00000099364	grey	0.0553507	0.041868	0.0313415	-0.0262937	-0.0366851	0.0109882	0.0101422	0.011074	-0.00983889	-0.0060309	0.138386	0.0706642	0.0308689	-0.0524215	0.00120902	0.0320899	0.0570081	-0.0385491	0.0724319	0.095155	FBXL19
ENSG00000110700	CD8T2	0.207656	0.486073	-0.076612	0.0055242	0.0350297	0.028414	-0.0262645	-0.0370265	0.0166036	0.058675	-0.0156303	0.133981	0.149793	0.0382165	0.0476602	-0.103062	0.0516532	0.165904	0.0244529	-0.0424895	RPS13
ENSG00000099385	CD8T18	-0.0205171	0.0402995	0.0957759	-0.0221738	0.00647583	0.0681667	0.022602	-0.030939	-0.0602478	-0.111091	0.0117795	0.0609641	0.0573499	-0.053366	-0.0585235	0.117105	-0.0134857	-0.0771538	0.0589092	0.0505322	BCL7C
ENSG00000099622	CD8T6	0.0434922	0.0331166	0.0897534	-0.00329968	0.122063	0.161018	0.0559675	-0.0787223	-0.103265	-0.00258781	0.0212372	0.0587789	0.03424	-0.0386994	-0.013154	0.0348012	0.0411864	-0.107758	-0.0288241	-0.0443213	CIRBP
ENSG00000099624	grey	0.122082	0.203466	-0.0507084	0.0110728	0.0279111	0.0518896	-0.043207	-0.0746587	-0.0195832	-0.000937909	-0.0736811	0.0960705	0.0518849	0.0476762	0.00243882	-0.0613984	-0.056823	0.0223921	0.0217164	-0.0693987	ATP5F1D
ENSG00000099725	grey	0.0944241	0.0935241	-0.153302	0.0014817	-0.0224825	-0.0450169	-0.0407915	0.0149709	-0.0792939	-0.0757393	0.00264466	-0.0687435	-0.0231913	-0.0453599	-0.0829321	-0.0202604	0.0510582	0.0135496	-0.00656172	-0.0533586	PRKY
ENSG00000099783	grey	0.0969375	0.0689534	-0.120081	-0.0309513	0.113239	0.100047	-0.0475459	-0.0470718	-0.0650829	-0.0530214	0.100414	-0.0119895	0.0750169	-0.0132552	0.0184262	-0.0563819	0.0826661	-0.0250315	-0.0397579	-0.0246322	HNRNPM
ENSG00000099785	CD8T10	0.00817353	0.208465	-0.0107777	-0.0169104	-0.0483617	0.0893596	0.12217	-0.067206	-0.0728012	0.0556293	0.0504089	0.0940791	0.0417805	-0.109825	0.0183386	0.0761678	0.0719572	-0.0161208	0.0318073	0.0543611	MARCHF2
ENSG00000099795	grey	0.0445723	0.146649	0.0886385	-0.0698681	-0.000868892	0.108782	0.0503079	-0.0617277	0.100571	0.190534	0.101484	0.0868801	0.132026	-0.00185274	0.164774	0.0220483	0.0556973	0.127143	-0.0495569	0.0136337	NDUFB7
ENSG00000099797	CD8T1	0.1098	-0.0193774	-0.0983681	-0.0954224	0.0804177	0.0502096	-0.0830184	-0.0992347	-0.0505228	-0.0848194	0.0286325	-0.132736	0.0904316	-0.0777409	-0.0225212	-0.0719546	-0.0383048	-0.0300129	-0.064138	-0.136888	TECR
ENSG00000099804	grey	0.0679558	0.213953	-0.0117164	0.0533198	-0.00411765	0.0222014	-0.0408756	-0.0345449	0.00958545	-0.0127002	-0.0640464	0.0156083	-0.0180517	0.0137618	-0.0854906	-0.0853617	0.0168001	-0.0869966	0.0014461	0.0677013	CDC34
ENSG00000099810	grey	-0.000679211	-0.0656207	-0.0424285	0.144951	-0.0215538	0.00478565	0.163337	0.118413	0.0761662	0.0650938	0.0132807	0.0365609	-0.0180856	0.0960501	0.061425	0.0127287	0.144737	0.00240082	0.109605	0.160644	MTAP
ENSG00000099817	grey	-0.00700281	0.0257762	0.0862929	-0.0592696	0.060426	0.0427714	0.0400294	-0.0669279	0.095447	0.0282897	-0.0111139	0.0425473	-0.00872359	-0.0720653	0.0164986	-0.034018	-0.0294844	-0.0194991	0.0320613	0.0326116	POLR2E
ENSG00000099821	grey	0.104889	0.191205	-0.0383932	-0.0580375	0.00622437	0.113599	-0.071763	-0.10304	-0.0103918	-0.0378663	-0.0597543	0.107504	-0.0623357	0.0679042	0.0520185	-0.0363227	0.0203202	-0.0501624	-0.0352168	0.0580681	POLRMT
ENSG00000099849	grey	0.0685984	0.107686	-0.0240904	0.0300182	-0.00226232	-0.127067	-0.0401891	-0.000616089	-0.00204937	-0.0804233	-0.0306834	-0.0529255	0.0100712	0.0337658	-0.0228687	-0.104712	-0.10763	0.0714767	0.00666871	-0.044035	RASSF7
ENSG00000099875	CD8T9	0.00958269	0.126853	0.0231684	0.0145558	-0.101691	0.100046	0.0770493	-0.115929	-0.0145158	0.13258	0.0179391	0.145059	0.0476949	0.0336508	0.016364	0.00217811	0.161335	-0.0265011	0.042365	-0.00715965	MKNK2
ENSG00000099904	grey	-0.102616	-0.111363	0.0685544	-0.0782335	-0.0933594	0.108316	-0.0200814	-0.0963277	-0.0215316	0.0775176	0.00178935	-0.0971683	-0.026004	-0.119492	-0.0100988	0.05338	-0.022792	-0.124992	-0.0581156	0.0704148	ZDHHC8
ENSG00000099910	grey	0.109704	0.0213429	0.0173428	0.0476574	0.0308957	0.00826325	0.117863	0.0631625	-0.0562317	-0.0326622	0.0904473	-0.0769648	0.0532556	0.00449648	-0.0167593	0.0251326	0.104141	0.00279006	0.0131772	-0.028882	KLHL22
ENSG00000099917	grey	-0.117087	-0.0781497	0.0203391	0.131135	-0.0552613	-0.072478	0.0925734	0.0534988	0.0334438	-0.00819707	-0.057626	-0.0235803	-0.0251124	0.00460712	0.003135	0.0133295	-0.00512186	0.0441418	0.0918699	0.0602184	MED15
ENSG00000099940	grey	-0.00295177	0.0100294	0.0857319	-0.0203878	-0.0782292	0.00267101	0.0444025	0.0173049	-0.00997298	0.0607151	-0.00704272	0.116662	0.0524883	-0.0295478	0.0537602	0.00830752	0.0251254	0.115122	-0.059409	0.0979293	SNAP29
ENSG00000099942	grey	-0.111423	-0.0770289	0.104417	0.0806239	-0.11939	-0.0506453	0.0277381	0.0362896	0.0667987	0.061186	-0.0340209	0.0958076	-0.0899493	0.0641837	0.0726627	0.0943767	0.102945	-0.054157	-0.0627601	0.1442	CRKL
ENSG00000099949	grey	0.0111495	0.148717	-0.0267067	-0.0464666	0.016025	0.0343786	0.00489556	-0.113254	0.00918116	0.0936135	-0.0443729	0.0407973	0.0156718	0.0246718	0.0455292	-0.0666992	-0.0296526	-0.0364089	-0.0485011	0.0647176	LZTR1
ENSG00000099956	grey	0.0536178	0.0293705	0.0687637	0.0312997	0.010176	0.0535027	-0.030821	0.0392999	0.000588935	0.0371179	0.0211151	0.0971308	0.0905004	0.0794361	0.0665689	0.00657347	0.0358005	-0.041181	0.0476774	0.0430156	SMARCB1
ENSG00000099968	grey	-0.0812942	-0.0862858	0.230565	0.0863817	-0.0336465	0.0661942	0.175072	0.115857	0.169882	0.13624	0.0153293	0.0301476	-0.012685	0.0423975	-0.0455283	0.0657327	0.0788547	-0.0128505	-0.0093285	0.154721	BCL2L13
ENSG00000099977	CD8T1	0.286775	0.269205	-0.118224	-0.186662	0.135963	0.0863524	0.0337908	-0.0718007	-0.073004	-0.0451914	0.180517	0.0444903	0.236689	-0.0535648	0.120152	-0.0371363	-0.00955277	0.0762402	-0.0309158	-0.0729127	DDT
ENSG00000099991	grey	0.0925423	0.0819502	0.00133464	-0.0772343	0.00143612	0.0722759	-0.0472463	-0.0198779	0.062171	0.00438259	0.0771951	0.0404394	0.0640819	0.0697662	0.1229	0.00933317	0.149004	0.0725841	0.0513805	-0.0113486	CABIN1
ENSG00000099992	grey	0.0430442	-0.0407406	-0.0723599	0.0714905	0.0248561	0.0283243	0.0982175	0.0429672	0.060387	-0.00340184	0.027833	-0.00814478	0.0990054	-0.105319	0.00891784	0.0304817	0.0495477	-0.0622132	-0.0053429	0.0692052	TBC1D10A
ENSG00000099995	grey	0.0761557	0.255976	0.00478634	0.0942097	-0.0232748	0.00655411	0.0701474	0.0836409	0.042936	0.135007	-0.0138512	-0.012915	0.0922844	0.0953613	0.0330331	-0.0234492	0.0924718	0.0396206	-0.0138441	-0.051722	SF3A1
ENSG00000099999	CD8T9	0.00642453	0.0549931	-0.0105033	-0.00654315	-0.0239072	-0.00726163	0.0109458	0.0238564	0.030544	0.130246	-0.0243549	0.0555842	0.0168209	0.0886099	0.0382235	0.0153455	0.0398569	0.0875242	-0.105983	-0.072441	RNF215
ENSG00000100014	CD8T15	-0.115758	-0.147402	0.10718	0.140896	-0.000262548	-0.0246353	0.0277819	0.26523	0.108008	-0.0814088	-0.0127467	0.00892759	-0.0947207	-0.0635798	-0.0208475	0.223695	-0.040618	0.029119	0.173678	0.202209	SPECC1L
ENSG00000100023	CD8T10	0.00596176	-0.0321874	-0.00061993	-0.115981	-0.00137582	0.0604017	0.00253866	0.015052	0.025692	0.00765625	0.104347	-0.0538477	0.00170776	-0.0537468	0.139405	0.0174799	-0.0156144	-0.0422995	0.0194575	-0.0388488	PPIL2
ENSG00000100027	CD8T19	-0.154088	-0.10855	0.0676782	0.151645	-0.0718691	-0.0288438	-0.0360708	0.00134022	0.0452828	0.0446015	-0.161438	0.0904802	-0.0600194	0.0656089	-0.0081608	0.0385318	0.0157576	-0.0130673	0.0103588	0.157039	YPEL1
ENSG00000100028	grey	0.151961	0.119748	-0.0462395	-0.0918386	0.0524248	0.0422898	-0.00868587	-0.0319765	-0.0587608	0.00465859	0.0603457	0.00748057	0.0693035	-0.0154185	-0.0212697	-0.0557873	-0.0124107	0.120929	-0.0503995	-0.0425711	SNRPD3
ENSG00000100030	CD8T10	0.0150161	-0.0935066	0.105883	-0.0162782	0.0361334	0.169339	0.0660308	0.038974	0.125815	0.0370129	0.011221	0.0525599	0.00334476	0.00609975	0.0103309	0.108977	0.192961	0.0620275	-0.0562084	0.0392707	MAPK1
ENSG00000100034	CD8T6	0.0827981	0.0274566	-0.128714	-0.163018	0.170523	0.066774	0.109252	-0.0301728	0.0308358	-0.0109685	0.197225	0.0673012	0.0997052	0.0251208	0.134228	0.0174461	0.133614	0.0412391	0.0376712	-0.0609771	PPM1F
ENSG00000100038	grey	-0.0405284	0.0149968	-0.00674624	-0.00335494	-0.0981501	-0.109073	-0.016656	0.134515	0.137082	0.0453953	-0.00420086	0.0219478	0.0276716	0.108127	0.0666555	-0.0711722	0.0429543	0.0984565	-0.113459	0.036988	TOP3B
ENSG00000100055	grey	-0.0101357	-0.0259261	0.0981284	-0.0261124	-0.0216125	0.103902	0.158073	0.0392597	-0.0471885	0.0760992	0.0655315	-0.0191669	0.0653472	-0.110702	0.0262159	0.107697	-0.0164304	-0.0603377	0.0754767	0.0289971	CYTH4
ENSG00000100060	grey	-0.0677608	-0.0128323	-0.00868271	-0.0339083	0.0906178	0.0785317	0.0524292	-3.3764e-05	-0.15205	0.0838316	0.0169614	-0.0658974	0.0372106	-0.147844	-0.041807	0.0564267	-0.0490247	-0.131566	0.0818102	-0.0232003	MFNG
ENSG00000100068	CD8T18	0.00503208	-0.0493863	0.0123302	0.0346614	-0.00715835	-0.0373095	0.00376055	-0.00306196	-0.0336849	-0.00418631	-0.0340209	0.030582	0.0170624	0.030206	-0.0452055	-0.0343893	-0.0940817	0.0286963	0.053597	-0.00756546	LRP5L
ENSG00000100077	CD8T10	0.103248	0.00487516	-0.00246432	-0.00966097	0.0323614	0.0503816	0.169564	-0.0397729	-0.0840471	0.0988401	0.11481	-0.0116502	0.0337021	-0.0383038	-0.00299199	0.0229479	0.0506536	0.0161769	0.00678983	0.0092816	GRK3
ENSG00000100083	grey	0.0073316	0.0600569	0.010489	0.0178965	0.044172	0.0469142	0.015572	0.00369954	0.0188688	-0.0579381	0.0397993	-0.128888	0.146119	-0.108629	-0.108007	0.0168891	-0.0286977	0.00596551	0.00905635	0.0476272	GGA1
ENSG00000100084	grey	-0.0212401	0.0530781	0.0505741	0.0913611	0.0345606	0.0348374	0.125433	0.114839	-0.0643691	0.0836698	0.0236719	0.133555	0.0286328	0.203129	0.0969323	0.12177	0.114832	0.0510315	0.0957297	0.0247786	HIRA
ENSG00000100092	grey	-0.00241571	0.133256	0.160138	-0.0677357	-0.154227	0.158957	0.0821347	-0.0931189	0.0522313	0.107641	0.0165468	0.207628	0.0794344	-0.0624598	0.110321	0.0251985	0.0137095	0.0526267	0.00772069	0.118971	SH3BP1
ENSG00000100095	grey	0.0634288	0.0650734	0.0994401	-0.0367567	0.0419307	0.0125483	0.0868183	-0.0576204	0.0052144	0.0855673	0.0362063	0.109302	-0.00232051	-0.00220593	0.0333336	-0.00424757	0.0178022	0.158406	-0.034381	0.0101815	SEZ6L
ENSG00000198886	CD8T2	0.263529	0.484495	0.00450799	0.0839937	-0.0186237	0.0749575	-0.0891368	-0.14256	-0.0252244	-0.0137142	-0.071197	0.243799	0.11554	0.0699397	0.0494926	-0.109531	0.052734	0.0797797	0.0112281	-0.0336397	ND4
ENSG00000100099	grey	0.0777576	0.00697078	-0.014227	-0.0820637	-0.010294	-0.0514152	0.0143406	0.12027	0.151929	0.076528	0.0575603	0.0109525	0.0641403	0.17628	0.200943	0.00988502	0.078895	0.0791399	-0.00668395	-0.0668566	HPS4
ENSG00000109321	CD8T4	-0.077496	0.0506865	0.0602177	0.24074	-0.0135875	-0.162676	-0.0610393	0.0461099	-0.0271493	-0.00264726	-0.211082	-0.0206001	-0.169057	0.0552822	-0.170025	-0.0731077	-0.0965961	-0.0787884	0.0133305	0.0823163	AREG
ENSG00000100105	CD8T13	0.0520972	0.0152624	0.0911916	0.00267735	-0.14266	-0.0358973	-0.0245243	0.0378856	0.0441524	0.0988269	-0.0464976	0.0988627	-0.0776061	0.155068	0.0373512	0.0223078	0.0426305	0.0198367	-0.154302	-0.0169187	PATZ1
ENSG00000100106	CD8T15	-0.118487	-0.0686554	-0.0163104	-0.0611157	-0.0787121	-0.0330756	0.058265	0.0537217	-0.108117	0.0264838	-0.00482862	0.038862	-0.0937589	-0.0934972	0.0364601	0.144579	-0.0398045	-0.0977363	-0.0312075	0.112929	TRIOBP
ENSG00000100109	grey	0.0805847	0.12276	0.0238849	-0.0104718	0.0981795	0.0646524	-0.0217618	0.00615734	-0.0672815	0.0163112	0.0235956	0.0854802	0.086405	0.0157361	0.0825875	-0.011792	-0.017387	-0.0719072	0.0268291	0.042988	TFIP11
ENSG00000061337	CD8T4	-0.131682	-0.0341828	0.0346202	0.240712	-0.0493412	-0.091313	-0.0827218	0.0286752	0.127009	-0.0840713	-0.202738	0.0515824	-0.103512	0.0615765	-0.0697366	-0.0277559	-0.0848708	0.0298162	0.147892	0.151271	LZTS1
ENSG00000187514	CD8T2	0.22712	0.481804	-0.121782	0.0423894	0.20967	0.0763371	-0.0136122	-0.121672	-0.174555	0.0243739	-0.0516818	0.0868094	0.157779	-0.025746	-0.110965	-0.152612	-0.0856054	0.0172069	0.162791	-0.131366	PTMA
ENSG00000100142	CD8T10	0.0349741	0.0616018	0.122363	0.0419699	0.0255316	0.182209	0.0620197	0.105557	0.0294851	0.00135788	0.0299986	0.0542138	-0.028072	-0.0271202	-0.00975051	0.157578	0.058889	-0.0516539	0.0526894	0.0738212	POLR2F
ENSG00000100147	grey	0.0631315	0.136062	0.109475	0.110033	-0.122185	0.115146	0.0637601	-0.0193547	0.13029	0.274767	-0.0711513	0.140303	-0.0493027	0.1231	0.137331	0.0182127	0.0308284	0.0467553	-0.0595648	0.00140007	CCDC134
ENSG00000100150	CD8T16	0.00357725	-0.0558742	-0.00546923	-0.0468649	0.120542	-0.0708346	-0.0951552	0.0143731	-0.0303017	-0.0588797	0.0603698	-0.0721385	0.0420544	0.0541976	-0.00502141	-0.0237413	0.0782683	-0.0599425	0.0267921	-0.138164	DEPDC5
ENSG00000100154	grey	-0.0790476	-0.0708072	0.106878	0.0789692	-0.022948	-0.0528037	0.15906	0.0167138	0.10878	0.131734	-0.00444022	0.00824002	-0.116612	0.138726	0.0304032	0.076479	-0.0592406	0.0981825	0.0426882	0.208086	TTC28
ENSG00000100201	CD8T10	-0.0750368	-0.0563355	0.0459978	-0.0471143	-0.0266869	0.104604	0.0157841	0.0370434	-0.107503	0.0137653	0.0592586	-0.0726926	0.0512007	-0.0211361	0.0290928	0.0737674	0.0365038	-0.0667247	-0.0641565	-0.0248041	DDX17
ENSG00000100207	grey	0.0476193	-0.00474752	0.104946	0.00543077	0.0596454	0.0641154	0.0715357	0.10122	0.1431	0.0356333	0.0892678	-0.0599814	0.0219228	0.0323543	0.0508924	0.102012	0.0559538	0.0361924	0.0526967	0.0593639	TCF20
ENSG00000100209	CD8T13	0.0429963	0.0348611	-0.0160435	-0.0162717	-0.0213783	0.0459165	-0.0956868	-0.0150437	-0.1335	-0.0634855	-0.00134096	0.0267697	-0.084058	0.0489127	-0.0430541	0.0067229	0.11415	-0.0363586	0.00516078	-0.0353704	HSCB
ENSG00000100211	CD8T8	-0.0807722	-0.036134	0.0439527	0.0244923	-0.0586402	-0.00297256	0.0288373	-0.0643602	0.116267	0.156735	-0.0377131	-0.0125691	-0.0443299	0.0186562	-0.037204	0.0305624	0.0599676	-0.0508138	-0.0286291	0.0523805	CBY1
ENSG00000100219	grey	0.0601898	0.0469946	-0.00768649	-0.00888689	-0.088742	0.0706326	0.0366607	-0.0885874	0.124726	-0.0149548	-0.0173363	-0.0250573	-0.0163416	-0.00189505	0.0336627	0.0800547	0.0572576	0.0339669	0.00800671	0.0442247	XBP1
ENSG00000100220	CD8T10	0.0215615	-0.0516256	-0.00912576	-0.0800326	0.055388	0.121574	-0.0259981	-0.101585	0.00285419	0.032172	0.0592539	0.0559398	0.0191	0.0322019	0.113932	-0.0357254	0.063763	-0.0741648	-0.100623	-0.0667326	RTCB
ENSG00000100221	grey	0.021624	0.0226299	-0.140436	0.00337682	0.137366	-0.0816831	-0.0744742	-0.0789344	-0.0546693	-0.0885107	-0.0419847	-0.076812	0.0596005	0.00923846	-0.127546	-0.0606335	-0.079459	0.0664153	0.0572132	-0.0698004	JOSD1
ENSG00000100225	grey	-0.00696728	0.0416775	0.00984637	-0.0072299	0.0464409	0.122843	-0.0916787	-0.132143	0.00460008	0.0183086	-0.0375712	0.00745934	0.0919262	-0.137551	0.0652195	-0.114457	-0.0588386	-0.0926331	-0.0385233	-0.0115719	FBXO7
ENSG00000100226	CD8T10	-0.0104172	-0.0315857	0.0426713	-0.0646946	0.0706845	0.171082	0.00839333	-0.122473	-0.0651035	0.0511709	0.125853	0.0235582	0.0948869	-0.140323	-0.047098	-0.0294583	-0.06628	-0.119731	0.0156157	-0.00530617	GTPBP1
ENSG00000100227	grey	0.0285603	0.0184351	0.0545422	0.0643081	-0.0287083	0.0257483	0.0389852	-0.0225834	-0.0421338	0.0542035	-0.0509779	0.0662748	-0.00465983	0.0410035	0.0103974	0.11751	0.0481659	-0.0464964	0.0597706	-0.00366173	POLDIP3
ENSG00000100239	grey	-0.171593	-0.184746	0.0800693	-0.0464686	-0.0457323	0.0136946	0.157151	0.0310331	-0.035635	0.0675133	0.0302474	0.0184799	0.0206585	-0.165146	0.0593409	0.0323839	-0.0846001	-0.0791518	0.00549859	0.100927	PPP6R2
ENSG00000100241	CD8T19	-0.077252	0.0174935	0.0293043	0.0536174	-0.141204	0.0410809	0.132754	-0.0527375	0.0578215	0.0221208	-0.0610888	0.108252	-0.0600051	-0.0304638	0.0665953	0.0907649	-0.0810492	-0.172169	-0.00133447	0.170376	SBF1
ENSG00000100242	grey	0.0693537	0.0838082	-0.00668969	-0.11586	0.0317513	0.125006	-0.060841	-0.139602	0.01776	0.0688261	0.0474945	-0.0126685	0.0988598	-0.0884568	0.0765544	-0.0731934	0.0360399	0.08058	-0.0535568	-0.0197033	SUN2
ENSG00000100243	grey	0.00798011	0.00831803	-0.0405582	-0.00270674	0.000625433	0.00427528	0.0343669	-0.128144	-0.0050534	0.0288124	0.0220699	-0.0408895	-0.0159309	-0.00757566	-0.0120838	0.0367545	-0.0832067	0.0370904	-0.0378049	0.0182648	CYB5R3
ENSG00000100258	CD8T17	0.0474297	0.0527447	-0.0275219	-0.0566047	0.00790422	-0.0878187	0.0232696	0.0487869	0.141041	-0.0362734	0.0561275	-0.0413865	0.0869963	0.0574829	0.00131186	-0.0320694	0.0313394	0.268178	-0.0211105	-0.00802108	LMF2
ENSG00000100263	CD8T1	0.157036	0.170326	0.00976762	0.0389382	0.119209	0.103134	0.0300639	-0.0458747	-0.000422171	-0.0513062	0.049005	0.1102	0.105123	-0.0018647	0.00273758	0.0645802	0.166135	0.0483595	0.0715616	0.0328286	RHBDD3
ENSG00000100266	grey	0.00471886	-0.043746	0.0133355	0.0580498	0.0217759	-0.0563167	0.0699511	0.140697	0.025919	0.0697269	0.0427186	-0.00487983	0.0784879	0.0739044	0.0906292	0.0296984	0.109485	0.0884817	-0.0138368	-0.0712183	PACSIN2
ENSG00000100271	grey	-0.0626335	-0.0235404	-0.0586132	-0.0157238	-0.0700099	0.0336484	-0.0186149	-0.0110918	0.00635632	0.0222091	0.00262714	0.00257101	-0.0206556	-0.0278155	0.0564735	0.0613796	0.00681911	-0.0467808	-0.0295163	-0.0111428	TTLL1
ENSG00000100280	CD8T19	-0.178566	-0.0349596	0.105731	0.105143	-0.0747201	-0.0308133	0.0198713	0.0780037	0.0715022	0.0870139	-0.131615	0.0127248	-0.071059	0.0326999	-0.0432048	0.0681914	-0.0343205	0.06225	-0.0555819	0.0486002	AP1B1
ENSG00000100281	grey	-0.00782373	0.0336812	0.085881	-0.00411913	-0.0313123	-0.00536867	-0.045905	0.0396223	0.0724261	-0.0213639	-0.0386461	-0.0163696	0.0395044	-0.0565716	-0.0118981	-0.050213	-0.0996241	-0.117237	-0.0237437	0.0449141	HMGXB4
ENSG00000100284	grey	0.0490708	0.0892061	-0.0366913	0.0312046	-0.0359147	0.0309537	-0.0716055	0.077769	0.0421007	-0.0501463	-0.0308136	-0.0149866	0.00907752	-0.0238642	-0.0306929	0.00996895	-0.0160799	-0.00840939	0.0562316	-0.072387	TOM1
ENSG00000100288	CD8T10	0.0397896	0.043716	0.0120196	-0.086353	-0.0313736	0.0326785	0.056928	0.0173062	0.1329	-0.0207778	0.0523409	-0.0207661	-0.00193716	0.0254827	0.097448	0.140435	0.0415237	-0.00214315	0.0276954	0.00836619	CHKB
ENSG00000100296	CD8T19	-0.0608514	-0.0427395	0.0741735	0.0490163	-0.0339483	-0.00382445	0.0614074	-0.0467497	-0.0424674	0.118564	-0.00150357	0.0836601	-0.00830335	0.0217921	-0.051094	0.026423	-0.0263999	-0.0419369	-0.0843594	0.094271	THOC5
ENSG00000100297	grey	0.119507	0.125617	-0.0612311	-0.108413	-0.0424475	0.0143012	-0.0220024	-0.0304293	-0.0386147	-0.0248485	0.0777316	0.0119461	0.0633	-0.100137	-0.0420306	-0.107175	-0.0582857	0.0635323	-0.050718	-0.036757	MCM5
ENSG00000100299	grey	0.028591	0.0301404	0.00582037	-0.0226817	0.150577	0.0359586	0.0511302	0.00672535	0.0196629	-0.0334071	0.135722	-0.0199952	0.106867	0.00643457	0.0892168	0.0703625	0.0610692	0.115757	0.0100607	0.0622813	ARSA
ENSG00000100300	grey	0.0837896	0.157763	0.0207588	0.0310705	-0.0678602	0.00996744	-0.00714052	-0.0686917	-0.0806162	-0.0396361	-0.0912081	0.150063	-0.0511373	0.0777443	-0.148456	0.0090927	-0.0185059	0.00284172	0.0411332	0.00959128	TSPO
ENSG00000100307	grey	-0.0848331	-0.162915	-0.000642252	0.0883107	-0.113447	-0.0930272	-0.0655114	0.0639564	0.0112627	-0.075225	-0.162141	-0.0747185	-0.174996	0.0395445	-0.0583288	-0.00456328	-0.0248115	0.00305009	0.0654201	0.0686333	CBX7
ENSG00000100311	CD8T1	0.176569	0.099289	-0.0814607	-0.0866993	0.0709967	0.0752827	0.236737	0.00488599	-0.0435037	-0.0766699	0.134024	0.140063	0.112443	0.00099632	0.112323	0.0383937	0.147283	0.13654	0.0266781	0.0150431	PDGFB
ENSG00000198899	CD8T2	0.325533	0.481452	-0.00777784	-0.0588483	0.0340352	0.132371	-0.135137	-0.194886	-0.108422	-0.0283585	0.0163743	0.266284	0.0740721	0.0561462	0.0717324	-0.122622	0.0973882	0.068777	-0.0140596	-0.0191388	ATP6
ENSG00000100320	CD8T17	0.0482414	0.0126937	-0.0448539	-0.00477808	0.0257227	-0.00700712	0.105778	0.0795398	0.251914	0.042099	0.0506721	0.142541	0.0117318	0.095453	0.104412	-0.0162516	0.00210622	0.362487	-0.0202917	0.0702547	RBFOX2
ENSG00000100321	grey	-0.0272609	-0.00557664	-0.010844	0.0662753	-0.00184198	-0.0677739	0.173449	0.0295177	0.114896	0.147582	0.010365	-0.0641989	0.0533225	0.0623949	-0.000956906	-0.108865	-0.136557	0.191221	-0.0182086	0.089777	SYNGR1
ENSG00000100324	CD8T6	0.0164799	0.0431366	0.0194148	-0.038842	-0.0557685	0.0791898	0.0379493	-0.024678	-0.027264	0.0618872	0.105802	0.0614273	0.00798297	0.0330664	0.0729281	0.054634	0.176693	0.0312617	0.00645919	-0.0431372	TAB1
ENSG00000100325	grey	0.0291815	-0.0246637	0.00811427	-0.0217717	0.0721672	0.0246307	-0.0663932	0.0458528	-0.0330391	-0.0341816	0.0349732	0.0436524	0.0143798	0.0387795	0.00177261	-0.0356429	0.0791081	-0.0206551	-0.0553022	0.0221644	ASCC2
ENSG00000100330	CD8T16	0.00631899	0.0586827	0.025539	0.00174277	0.0449874	0.101605	-0.0037051	0.0147035	0.00199416	-0.00135077	0.013042	0.0487452	-0.0113841	-0.0750295	-0.0397269	-0.0285887	0.0767496	-0.0924644	-0.00505687	0.110083	MTMR3
ENSG00000100335	CD8T9	0.0522416	0.105156	0.0623484	0.109662	-0.000193578	0.0832623	0.00357498	-0.0203475	0.00982328	0.172211	-0.052576	0.109051	0.0249823	0.244653	0.00446214	-0.026443	0.0616356	0.0155853	-0.0284633	-0.0477034	MIEF1
ENSG00000004399	CD8T4	-0.117751	0.0975879	-0.0218958	0.239973	0.101543	-0.0754435	-0.0772078	-0.0330331	-0.0340994	-0.0141808	-0.259733	-0.0675177	-0.112661	-0.0779257	-0.161942	-0.0989226	-0.200029	-0.0434096	0.128492	0.0996262	PLXND1
ENSG00000100347	CD8T12	0.0922182	-0.00822081	-0.0460051	-0.0725303	0.12521	0.0875244	0.0135122	-0.0248435	0.0328294	-0.0273748	0.130114	0.0443697	0.211002	0.0187314	0.180498	-0.056087	0.133444	0.100356	0.0721302	-0.0966231	SAMM50
ENSG00000100348	grey	-0.0140505	0.109417	0.0190622	0.0906251	-0.0796879	0.0166274	-0.0311184	0.00158538	-0.0242497	0.0287909	-0.0572565	0.11474	-0.0144413	0.0525524	-0.00211609	-0.0334058	0.102644	-8.08141e-05	0.102692	0.0680809	TXN2
ENSG00000100351	CD8T3	-0.0959694	-0.0133444	0.146438	0.0870476	-0.129103	0.037067	-0.0867291	0.0546432	0.0538934	-0.0153825	-0.0408383	0.0664372	-0.155121	0.0927448	0.0157725	0.100553	0.0367435	-0.163052	0.0136967	0.0736379	GRAP2
ENSG00000184009	CD8T2	0.308813	0.479834	-0.0180216	-0.0274359	0.00562492	0.160059	0.0356252	-0.132507	-0.101373	0.06519	-0.00365958	0.214607	0.214798	0.0334703	0.00869815	-0.0740777	0.0827637	0.0418066	0.00315147	-0.0131347	ACTG1
ENSG00000100354	CD8T7	-0.254454	-0.216315	0.0777164	0.173146	0.0602789	-0.164941	-0.0640067	0.154504	0.0701053	-0.0725492	-0.0987512	-0.0853501	-0.131935	0.0205862	0.0265032	0.0385693	-0.0860224	0.00992761	0.00592952	0.0583045	TNRC6B
ENSG00000100359	grey	-0.0758927	-0.104385	0.0353951	-0.0522671	-0.0826594	0.0528252	-0.00822367	-0.0462145	-0.0386607	-0.00501518	-0.000292696	0.0278357	-0.0798	-0.0777518	0.00808803	0.0379551	0.0191326	-0.135587	0.00155002	0.082187	SGSM3
ENSG00000100364	CD8T14	-0.103451	0.0703209	0.120189	-0.0649907	-0.0229066	0.121481	0.185715	-0.00707539	0.100517	0.104552	0.08406	0.151256	0.0340195	-0.000525767	0.261966	0.14699	0.113268	0.0228284	-0.0741474	0.118865	KIAA0930
ENSG00000100372	grey	-0.0374815	-0.0728744	-0.0907975	-0.0308677	0.050568	-0.0339975	-0.111479	0.0631422	-0.00548221	-0.193194	-0.0174704	-0.0912829	0.00800877	-0.0736199	-0.074044	0.0262277	0.0149588	-0.0724046	-0.0213545	-0.0765516	SLC25A17
ENSG00000100376	CD8T15	-0.110416	-0.0649569	-0.033284	0.0465063	0.0715204	-0.0590754	0.0519221	0.0656944	0.0151398	-0.124484	0.0240303	-0.0381434	-0.0459451	-0.0403598	-0.0361944	0.171243	-0.0292028	0.0327607	0.115066	0.0452594	FAM118A
ENSG00000100380	CD8T10	0.0897985	0.0610248	0.0209822	-0.117622	-0.0481287	0.0871038	0.0229813	0.132679	0.0876735	0.0071061	0.142427	0.00249999	0.084481	0.0476673	0.157429	0.12421	0.134928	0.0776165	-0.0265241	-0.0988304	ST13
ENSG00000100385	grey	0.144091	0.00498038	0.015625	-0.0149629	-0.0309094	0.0573373	0.0168413	0.0638274	0.0161211	-0.0332537	0.059822	0.108743	0.112563	0.0892266	0.0967028	-0.0122262	0.128577	0.088147	-0.0771272	-0.02852	IL2RB
ENSG00000197728	CD8T2	0.35597	0.479535	0.00793565	0.0161679	0.131169	0.134508	-0.029738	-0.0471548	-0.00898402	0.0688484	0.0210367	0.146794	0.200463	0.0377495	-0.00288076	-0.0921588	0.0188097	0.0999223	0.0181625	-0.0247955	RPS26
ENSG00000100393	grey	0.0704346	0.0913668	0.0784963	-0.0127411	0.0810224	0.0930047	-0.00625774	0.0699496	-0.0109105	-0.0464415	0.0739385	0.228601	0.0276464	0.0107602	0.0398946	0.150253	0.0945065	-0.0335485	0.172693	0.0954174	EP300
ENSG00000100395	grey	-0.00769883	0.0843765	-0.0250346	0.108141	0.0111727	-0.00691416	-0.00756483	0.100434	-0.0551841	0.02242	-0.0315742	0.0816248	0.0345193	0.0382395	-0.0361979	0.0756558	-0.0398276	-0.0591285	0.0450107	0.159844	L3MBTL2
ENSG00000100401	grey	0.138846	0.0824947	0.0489198	-0.0871006	-0.0747964	0.0377646	-0.0237737	0.0196493	-0.00981935	0.0262999	0.0668042	0.0908293	-0.00873663	-0.0323291	0.0184732	0.0757913	0.135733	0.133801	-0.00982474	-0.0309512	RANGAP1
ENSG00000100403	grey	-0.0131687	-0.0367241	0.21726	0.0926659	-0.0394571	0.0725391	0.137467	0.0680437	0.152968	0.127953	0.0558385	0.149416	0.0811208	0.117956	-0.0372513	0.147416	0.0955117	0.0217584	0.156531	0.04152	ZC3H7B
ENSG00000100412	grey	0.00517572	-0.0847306	0.0124201	0.0273451	0.0428733	0.0829939	0.159	0.0286065	0.00993427	0.00590869	0.0330576	-0.0147074	0.0432989	-0.0431953	0.0134704	0.0903476	0.0212259	-0.0291144	0.218956	0.0046001	ACO2
ENSG00000139946	CD8T4	-0.113692	-0.0300854	-0.0356713	0.239972	0.138651	-0.201035	0.0121028	0.133327	-0.0805148	-0.0292064	-0.145943	-0.0333984	-0.0867518	-0.0854828	-0.124635	-0.00370978	-0.222185	0.0143716	0.329206	0.124875	PELI2
ENSG00000100416	grey	0.013875	-0.00390401	-0.08717	-0.0149377	0.0712716	0.0544151	0.0040455	-0.0425011	0.0280464	0.0523306	-0.036061	-0.159841	0.0274031	-0.143803	-0.105717	-0.0265877	0.0148248	0.0411488	-0.0106776	-0.0223525	TRMU
ENSG00000122026	CD8T2	0.355478	0.474495	-0.0576725	-0.0451988	0.11932	0.131465	-0.14499	-0.0590814	-0.0354784	-0.0750586	-0.045659	0.0745499	0.174169	0.100059	0.0745138	-0.110413	0.0900948	0.0784286	-0.031967	-0.087077	RPL21
ENSG00000075240	CD8T4	-0.133289	-0.073937	0.0652153	0.239225	-0.0490133	-0.0941371	-0.0265093	0.155763	0.0506535	-0.0222173	-0.203739	-0.0220539	-0.162847	0.103651	-0.0871905	0.127252	-0.0815919	0.000590113	0.0747007	0.0608369	GRAMD4
ENSG00000142655	CD8T4	-0.124483	-0.116491	0.161769	0.237397	-0.0505171	-0.0828969	0.0836279	0.0763229	0.016437	0.0106923	-0.112516	0.085609	-0.109539	0.127588	-0.0391405	0.0078772	0.0191017	-0.0147445	-0.0108374	0.134886	PEX14
ENSG00000100426	grey	-0.0880593	-0.0432571	0.136642	0.136098	0.00408757	-0.0415186	0.0233206	0.0642544	0.0835124	0.126951	-0.0554108	0.032541	-0.0688949	0.0774102	-0.0615331	0.00820202	-0.114619	0.00485361	0.0761097	0.108615	ZBED4
ENSG00000100429	grey	-0.084291	-0.0356	0.135511	0.0207959	-0.0673469	0.0597243	0.0536536	-0.0634357	0.152543	0.0569374	0.126479	-0.0273779	0.0217941	0.0245765	0.00483617	0.0240493	0.0248024	0.0285637	-0.001244	0.0892286	HDAC10
ENSG00000100441	CD8T13	0.0326087	0.110869	-0.0170781	0.129101	0.0561512	0.0313304	-0.0957066	-0.0315515	0.020885	0.0114838	-0.0917483	-0.0600391	-0.045148	0.0860033	-0.0301904	-0.0600865	0.0327193	-0.0731583	0.0408155	-0.0538024	KHNYN
ENSG00000100442	grey	-0.0173248	-0.00551674	0.107666	0.00353863	0.00376019	0.0849892	0.0953307	-0.0469225	0.0224977	0.0715327	0.0207242	0.14432	0.00522706	-0.0160715	0.0515623	0.121634	0.0660905	0.0242069	0.00248647	0.12147	FKBP3
ENSG00000100445	CD8T17	-0.0161608	0.124441	0.0940885	0.0985785	-0.00278993	-0.0918332	-0.0599692	0.057836	0.0128934	0.0376411	-0.0555748	0.175957	0.0430915	0.117152	0.0269302	-0.0849274	-0.0339318	0.196349	-0.0266038	-0.0116235	SDR39U1
ENSG00000100450	CD8T6	0.106144	0.0988398	-0.0389012	-0.0763528	0.0941124	0.24752	0.0242093	-0.137022	-0.0933339	0.0331242	0.0422073	0.123329	0.10338	-0.0767078	-0.0781151	-0.0453059	0.0901499	-0.186854	0.0185194	-0.0514706	GZMH
ENSG00000100453	grey	0.055512	0.149988	0.0679111	0.0788087	0.00693519	-0.0221091	-0.0651735	-0.0778087	0.0131796	0.00256872	-0.135356	0.0648173	0.0284993	-0.0111219	-0.0483148	-0.13335	-0.0624513	0.0748723	-0.019243	0.0247825	GZMB
ENSG00000198363	CD8T4	-0.081007	0.0379962	0.123433	0.237258	-0.0547317	-0.0890851	0.0344568	0.0309741	0.00264748	0.130024	-0.148939	0.0891582	-0.131117	0.125361	-0.105805	-0.0605308	-0.00994491	0.0356359	-0.0692941	0.0793926	ASPH
ENSG00000206503	CD8T2	0.262925	0.47433	-0.0575865	-0.192543	0.117945	0.180403	-0.0982926	-0.219972	-0.0434004	-0.0577595	0.0230771	0.15599	0.205195	-0.148201	0.117156	-0.0565819	-0.0478686	0.0815732	-0.0201321	-0.188366	HLA-A
ENSG00000100483	grey	0.105293	0.00374683	-0.0977541	-0.0529091	0.0166505	0.0601061	-0.0290393	0.097204	-0.091973	-0.100012	0.105631	0.0104949	0.0688655	-0.0863358	0.0223248	0.0736836	0.0452168	0.0120129	0.0316137	-0.00571401	VCPKMT
ENSG00000100485	grey	-0.0129488	-0.0350022	-0.077564	0.124447	0.0896351	0.0205146	0.0850324	0.0515527	0.0191685	0.0505291	0.0182389	0.0637839	-0.00994198	-0.0016588	-0.0293581	-0.0279266	0.00174976	0.0323113	0.107402	0.0625249	SOS2
ENSG00000100490	grey	0.00279299	0.0831788	0.0290062	-0.041951	-0.0804824	0.0193205	0.05148	-0.0619109	0.126689	0.1269	-0.00756862	0.00204804	0.000616434	0.0171992	0.0804002	0.0148192	0.0618597	0.00610789	-0.0769852	0.00765898	CDKL1
ENSG00000100503	grey	0.0414839	0.0829109	0.0583302	0.0530097	0.0599193	0.0606203	-0.0267478	0.0227404	0.0851497	-0.0782258	0.0703682	0.0803124	0.0739383	-0.080386	-0.0870735	0.0530732	0.0500955	0.00697424	0.0970963	0.00996181	NIN
ENSG00000100505	grey	-0.05105	-0.0117136	0.14514	-0.0551696	-0.0591574	0.0497281	0.0761788	-0.0260077	0.166483	0.116067	0.0339237	0.0677632	-0.0699477	0.106507	0.0291857	0.0639732	0.0497656	0.0563604	-0.0487356	0.0450305	TRIM9
ENSG00000100519	grey	0.044024	0.105985	-0.00694676	0.0151482	0.0414245	-0.00929855	0.116332	0.0349129	-0.0228071	0.0634363	0.0769201	-0.0287875	0.119606	0.0668287	-0.0933238	-0.0513841	-0.0674999	0.0204214	0.0176855	-0.0147806	PSMC6
ENSG00000100523	grey	0.0556323	-0.040122	-0.0735492	-0.0894605	0.0517629	0.114796	-0.0498651	-0.00997348	-0.0818105	-0.00925634	0.142427	-0.0771198	0.137367	-0.0998124	-0.00318704	-0.00337364	0.0184919	-0.0686459	0.0285663	0.0335702	DDHD1
ENSG00000100528	CD8T16	0.0783674	0.00569478	0.0762225	-0.0370806	0.0237273	0.149412	0.111289	-0.0564187	0.0577972	0.0872965	0.127768	0.0635037	0.0448613	0.100069	0.10051	0.0448719	0.221317	0.0692866	-0.111973	0.0399022	CNIH1
ENSG00000100532	grey	0.0895534	-0.0387954	-0.0464675	-0.0554941	-0.0075985	0.00789625	0.090273	0.0149464	0.0204455	0.00211344	0.136552	0.0129122	0.135183	0.023768	0.183173	0.0555065	0.0798024	0.084676	-0.0688471	-0.00306397	CGRRF1
ENSG00000100554	grey	0.0188458	0.0196275	0.0410245	-0.0542754	-0.0815763	0.0846578	0.119644	-0.0329295	-0.0236699	0.222742	-0.0236813	0.0667565	0.027677	0.049424	0.0177986	-0.0562987	0.0192731	-0.0474153	-0.030822	0.0386538	ATP6V1D
ENSG00000100564	grey	0.041683	0.0187937	-0.0785165	-0.0294688	0.0685297	-0.000203931	0.0212277	-0.0183542	-0.103102	-0.0263521	-0.043763	-0.100134	0.00352	-0.00787907	-0.0567324	-0.0691451	-0.0423659	0.0129164	0.0306689	0.0224258	PIGH
ENSG00000100567	grey	0.0758799	0.138816	0.0685265	0.0275931	0.0573364	-0.0417561	0.00373014	-0.0048705	-0.047023	-0.0243642	-0.0232378	0.0423157	0.0400498	-0.0135028	0.0388924	-0.0194571	0.0603359	-0.0145317	-0.00412461	-0.0948824	PSMA3
ENSG00000197956	CD8T2	0.288987	0.47413	-0.00290065	-0.0437871	0.0378297	0.0896715	-0.105317	-0.143217	-0.0534019	-0.0780033	-0.054627	0.135539	0.0980888	0.106408	0.00614809	-0.150414	-0.0110604	0.0643324	-0.0214556	-0.107519	S100A6
ENSG00000100578	CD8T17	0.113394	0.0672947	-0.0260084	0.0168579	-0.0182582	0.00615999	0.0763934	0.0534266	0.00201811	0.0375376	-0.0019313	0.0423938	-0.00733015	0.080162	0.0143638	0.0235853	-0.0214512	0.139786	0.0391801	0.01146	KIAA0586
ENSG00000100580	grey	-0.0602267	-0.00293126	-0.0233223	-0.00935073	-0.0193829	-0.0179019	0.0675345	0.0494242	0.068242	0.0174786	0.0172783	-0.0864631	-0.00239313	-0.0150051	-0.078648	-0.0328855	-0.0325942	0.0332048	0.00684857	0.122159	TMED8
ENSG00000100591	CD8T10	-0.0252838	0.0108541	0.00970447	-0.0315497	0.0450969	-0.00750804	-0.00905405	0.036647	-0.00981536	0.0234508	0.072163	-0.0237138	0.0473039	0.0180143	-0.0383136	0.019328	-0.0626367	0.0156844	-0.0174656	-0.0657258	AHSA1
ENSG00000100592	grey	-0.14758	-0.0913026	0.132696	0.0521427	-0.049228	0.00200509	0.187377	0.0568258	0.100002	0.0652426	0.0448246	-0.0568066	-0.0657487	-0.0555315	0.0191635	0.103757	-0.00560327	-0.0965204	0.06184	0.186176	DAAM1
ENSG00000100596	grey	-0.0338642	0.00507916	0.0781236	-0.0237489	0.018054	0.058509	0.0826201	0.0183915	0.0593683	0.0907841	0.179826	-0.0211217	0.159249	-0.0183136	0.102088	0.0340852	0.0330824	0.00527557	-0.0589661	0.0154038	SPTLC2
ENSG00000100599	CD8T13	-0.0929222	-0.0733749	0.158428	0.186164	-0.171188	-0.0238687	0.0308399	0.036535	0.0605512	0.108826	-0.0805889	0.0256583	-0.0842402	0.159926	-0.0343782	0.0368389	0.155661	0.00840045	-0.0524572	0.142884	RIN3
ENSG00000147459	CD8T4	-0.132487	-0.0762515	0.12426	0.237225	-0.0318703	-0.0350911	0.0770083	0.167552	-0.0573195	-0.0122613	-0.156299	0.0274183	-0.112446	-0.0148555	-0.130887	0.0902471	-0.0254368	-0.132544	0.0712108	0.0889496	DOCK5
ENSG00000100603	CD8T6	0.0878303	0.0170692	-0.0310878	-0.00918872	-0.0435569	0.113661	-0.0468449	0.0312858	-0.0635478	-0.0840402	-0.0479793	-0.0163648	-0.013896	-0.00611599	-0.0494918	0.0445024	-0.0309322	-0.0586489	-0.000537327	-0.039556	SNW1
ENSG00000100604	grey	0.0383026	0.0392913	-0.00109485	0.0657957	-0.113546	-0.0716196	0.101409	0.0501695	0.289258	0.0877713	-0.0301014	0.10136	-0.0401497	0.224944	-0.000701174	0.0683779	0.0467316	0.0767843	0.0919382	0.1439	CHGA
ENSG00000167613	CD8T4	-0.0480942	0.0521625	0.202067	0.237001	-0.15173	-0.0449863	0.0208334	0.121182	0.0358549	0.138141	-0.132614	0.136992	-0.00879389	0.118986	0.0107062	-0.0545505	-0.0100636	-0.0524655	0.0694584	0.118005	LAIR1
ENSG00000100612	grey	0.122789	0.199541	-0.031813	0.000740673	-0.00578974	-0.0124653	0.135336	-0.0194948	0.113662	0.124229	0.0766795	0.168389	0.107533	0.147774	0.107921	-0.0236207	0.01136	0.156883	0.0961552	0.0665219	DHRS7
ENSG00000100614	CD8T12	0.0527331	-0.0194438	-0.0866012	-0.00696377	0.12346	0.0484169	-0.0173413	0.0318122	-0.0125785	-0.0442178	0.0863705	0.0284952	0.129266	0.0530051	0.0871197	0.029003	0.116229	-0.0270964	-0.0601594	-0.00955386	PPM1A
ENSG00000100629	grey	0.0582417	-0.0740046	-0.00293812	-0.0403685	-0.143319	0.0521182	0.0325479	-0.060943	0.135297	0.0342352	0.114063	-0.0165631	-0.00740171	0.0600639	0.00661681	-0.0118296	0.124115	0.065419	-0.155293	-0.0450855	CEP128
ENSG00000100632	grey	0.119796	0.141064	-0.0147624	0.000687362	-0.0187419	-0.0151967	0.134159	0.0465118	-0.0104012	0.0762936	0.0606892	0.146907	0.0319684	0.085203	0.103191	0.0235033	0.0831049	0.0953289	0.00715763	0.0149184	ERH
ENSG00000100644	CD8T5	0.025006	0.00148018	-0.198798	-0.073064	0.254153	0.0613407	-0.112072	-0.0951018	-0.221812	-0.124691	0.119151	-0.108355	0.0326439	-0.136345	-0.113127	-0.185463	-0.00973166	-0.112718	0.0591776	-0.0894309	HIF1A
ENSG00000100647	CD8T18	-0.0440582	-0.103226	-0.00247103	0.0571909	0.145192	-0.0163221	0.0783027	0.136321	-0.0436664	-0.0498962	0.0920186	-0.0939053	-0.0458726	0.0545766	-0.023372	0.108864	0.0155121	0.0621752	0.134604	0.122231	SUSD6
ENSG00000146963	CD8T4	0.0818278	0.115516	0.146886	0.236937	-0.0203625	-0.0394135	0.0481665	0.0512754	0.0404698	0.0961354	-0.156593	0.111274	-0.0569642	0.179749	-0.0713321	-0.0115698	0.00608573	0.0417084	-0.0097417	0.128657	LUC7L2
ENSG00000100664	CD8T10	0.124798	0.140519	-0.09397	-0.149583	0.0423033	0.0827793	0.0223703	-0.0117033	0.0424576	0.0487572	0.13697	0.0281083	0.10917	-0.0404907	0.0423664	-0.000874996	0.0968644	0.125959	-0.083029	-0.0363241	EIF5
ENSG00000100697	CD8T16	0.0121851	-0.17724	-0.0591759	-0.0316486	-0.0283346	0.0541078	0.0604415	0.0630008	0.00342836	-0.0376503	0.159536	-0.0897066	-0.0925708	-0.0409634	0.0641077	0.0866554	0.130856	-0.0747866	0.0499261	0.0180056	DICER1
ENSG00000100711	CD8T6	-0.00167144	0.00532464	-0.0592512	-0.154374	-0.0107	0.0626391	-0.0750077	-0.0764723	-0.0751713	-0.0574739	0.0681905	0.00761346	-0.0184084	-0.0374733	0.0236171	0.0759139	0.138546	-0.022682	-0.0718459	-0.109734	ZFYVE21
ENSG00000100714	grey	-0.0690441	-0.138731	0.0605942	0.0678336	-0.0278509	-0.00901646	0.104344	-0.00779464	-0.0650273	-0.0192263	-0.0629865	-0.0545861	-0.0318525	0.0189664	-0.0537324	-0.0088375	0.0102533	-0.103638	0.0585529	0.0275856	MTHFD1
ENSG00000100722	grey	0.035354	-0.044611	0.0372489	0.105207	-0.144591	-0.0295062	0.106746	0.0494351	0.133396	-0.0036032	0.0113521	0.0120761	-0.0137839	0.0340103	-0.038675	0.0853235	0.155481	0.0697417	0.00467602	0.101106	ZC3H14
ENSG00000048740	CD8T4	-0.166982	-0.10846	0.0895832	0.236347	-0.0668907	-0.0336147	0.0153154	0.23643	0.0972092	-0.0237752	-0.194913	0.0380143	-0.18413	0.107136	0.0157794	0.151405	0.0511437	-0.0155141	0.092383	0.182209	CELF2
ENSG00000100744	grey	0.0918864	0.159861	0.0411109	-0.0524107	-0.0568922	0.0638716	0.0253778	-0.0203142	-0.0998132	0.049915	0.0630563	0.0907183	0.132147	-0.0131666	0.0432431	-0.025083	-0.0312837	0.00657549	0.00544378	-0.0849192	GSKIP
ENSG00000100749	grey	0.133478	0.109486	-0.0167344	-0.00360842	-0.0788121	-0.0210532	-0.0157531	-0.0912479	-0.120997	0.061374	-0.046264	0.0508506	0.0852313	0.070551	-0.0965416	-0.0921431	0.0853584	-0.0473011	-0.0672008	-0.0769587	VRK1
ENSG00000100764	CD8T16	0.0203834	-0.0191754	-0.0407659	0.00344296	0.0503722	0.0112476	-0.0594191	-0.119091	-0.127704	0.0129618	0.00559481	0.0894725	0.0694643	0.0705121	-0.0353332	-0.0231597	0.118886	-0.0521893	-0.0198003	-0.0743229	PSMC1
ENSG00000100784	CD8T12	-0.0238385	-0.0557104	0.0986542	-0.0920883	0.0679727	0.104798	0.0451338	-0.0147573	0.0941708	0.0459007	0.168984	0.0130582	0.173804	-0.0818728	0.100969	0.00654389	0.0172111	0.108037	-0.0367516	-0.0035399	RPS6KA5
ENSG00000100796	CD8T10	0.14039	0.0103707	0.00177437	-0.0262172	0.054468	0.0890429	0.0666501	0.107179	0.0214985	0.003902	0.103929	0.0610993	0.0726844	0.0880406	0.0706779	0.0460022	0.135439	0.0620609	0.0235953	-0.0216676	PPP4R3A
ENSG00000100804	grey	-0.00213448	-0.00315398	0.111379	0.0560972	0.0120528	-0.00939036	0.112677	0.0396154	0.00921426	0.0140639	0.0290746	0.0117882	0.00955513	0.0767564	0.111302	-0.0652909	-0.0322461	-0.0156237	-0.0587406	-0.0419699	PSMB5
ENSG00000100811	CD8T10	0.050092	0.0295395	0.0371074	-0.107522	-0.168503	0.0459706	0.00486101	-0.0588342	0.0357161	0.0221333	0.08111	0.0879425	0.0882697	0.0660572	0.103336	0.00364667	0.0890962	0.0481918	-0.111837	0.0230099	YY1
ENSG00000100813	grey	0.109472	0.0201579	-0.11613	-0.0698495	0.121932	0.021053	-0.0624714	0.0587192	0.00991402	-0.154728	0.0699732	-0.111789	0.10598	-0.0736076	-0.0892998	0.0912011	-0.0637462	0.101331	0.0584675	0.0453056	ACIN1
ENSG00000100814	grey	0.00864853	0.0414163	-0.0404413	0.0414317	-0.0905926	-0.0721847	-0.0506013	-0.0354906	-0.0184114	0.00234283	-0.0933892	-0.0270576	0.062683	-0.046417	-0.059627	-0.0247502	-0.115695	0.00433257	-0.0082171	-0.0162402	CCNB1IP1
ENSG00000100815	grey	0.0347194	0.0248807	-0.00377262	-0.0267263	-0.000314194	0.0463213	0.0459824	0.0941403	0.0276783	-0.0350766	0.0177724	-0.0491789	0.124249	-0.10705	-0.0172129	0.0323305	-0.0367251	0.0432966	0.0199222	-0.025266	TRIP11
ENSG00000138031	CD8T4	-0.0791117	0.152034	0.0879568	0.235248	-0.180375	-0.0895384	0.109969	0.0161495	0.0628117	0.111923	-0.230222	0.23646	-0.0695136	0.143907	0.0311566	-0.0367042	0.00541726	0.0567788	0.0370726	0.119505	ADCY3
ENSG00000163629	CD8T4	-0.0917718	-0.0333069	0.0881392	0.234583	-0.0380645	-0.141908	0.172245	0.357354	-0.0140753	-0.00999309	-0.096321	0.0691111	-0.0938497	0.0410389	-0.113941	0.176004	-0.122468	0.0462934	0.232876	0.095824	PTPN13
ENSG00000100852	CD8T12	-0.00637851	0.0963759	-0.0221766	0.0206358	0.03478	-0.0341694	-0.0944374	-0.0209915	0.0450361	-0.062402	-0.0412673	-0.0403256	0.0501122	-0.0368095	-0.0613989	-0.10784	-0.074681	0.0179784	-0.0118134	-0.077472	ARHGAP5
ENSG00000100883	grey	-0.00412421	0.0600514	-0.0178611	0.0295914	0.0918785	-0.0242061	-0.124344	0.0304961	-0.0667809	-0.102115	-0.021261	-0.081538	-0.0319938	-0.0446713	-0.140475	-0.0994148	-0.0746962	-0.101023	0.0954103	-0.0721877	SRP54
ENSG00000171858	CD8T2	0.279692	0.472151	-0.115615	0.0409053	0.052731	0.0825051	-0.0622914	-0.0970697	-0.0449286	-0.0613232	-0.12535	0.156864	0.065619	0.0605851	0.0423051	-0.140201	0.0463528	-0.0188105	0.0759925	-0.0235389	RPS21
ENSG00000100890	grey	-0.073566	0.0130943	0.103493	0.0440565	-0.0576745	-0.0658236	0.15942	0.0203522	-0.0424386	0.0804023	-0.0249939	0.0259911	0.0516625	-0.00679321	0.0150145	0.000903653	0.0116193	0.0262525	0.0240218	0.0747596	PRORP
ENSG00000100897	grey	0.0433446	0.0394361	-0.0600211	-0.00459141	-0.0328848	0.0344801	-0.0610316	-0.0466623	-0.0501785	-0.0659312	-0.0053231	0.0424595	0.0627273	-0.0342178	-0.0533001	0.0143469	0.0401167	-0.0136208	0.0504861	-0.0604597	DCAF11
ENSG00000100902	grey	0.118492	0.0520944	-0.0506015	-0.0621243	-0.000669042	0.105594	0.0113644	-0.00382864	-0.0356712	0.0963822	0.0766439	-0.00511001	0.0300537	-0.0352349	-0.122206	0.00818697	0.0896035	-0.0323269	0.0348218	0.0451196	PSMA6
ENSG00000109475	CD8T2	0.220359	0.462199	-0.0681829	-0.0227623	-0.104145	0.104049	-0.113674	-0.134365	-0.0891508	0.0648891	-0.109788	0.17548	0.0349321	0.0453196	-0.0616678	-0.171249	-0.00304971	0.00951759	-0.0619901	-0.0452546	RPL34
ENSG00000100911	grey	0.00596521	0.137234	-0.0266782	0.0969301	-0.0247095	-0.0809029	-0.09322	-0.0890031	0.00879321	0.00231715	-0.101424	0.034564	0.0234142	0.000816217	-0.0950383	-0.06176	-0.0174815	0.0128897	0.0856069	0.0971957	PSME2
ENSG00000100916	grey	0.0388192	0.0367979	-0.110348	-0.0708008	0.0606268	-0.0609877	-0.00945727	0.00569824	-0.0402764	-0.104753	0.0553356	-0.044936	0.0496635	-0.0300748	0.0587693	-0.097359	0.0665653	0.0433209	-0.0165182	-0.0902172	BRMS1L
ENSG00000100934	grey	-0.0412147	-0.0545126	-0.0811928	0.0142931	0.0132368	-0.0301892	0.0305804	0.0422828	0.0915437	-0.0340134	0.0222811	-0.021864	-0.00367678	0.00114444	-0.0599361	-0.00733962	0.08534	-0.0555309	0.0128145	0.0706319	SEC23A
ENSG00000198763	CD8T2	0.288988	0.461267	0.0113804	-0.000927658	-0.0130743	0.113003	-0.0243627	-0.16693	-0.0528231	0.0183788	0.00370793	0.262922	0.033415	0.120375	0.029363	-0.112919	0.147196	0.0371598	-0.00175535	-0.0303735	ND2
ENSG00000180628	CD8T4	-0.0770069	-0.0984009	0.00710604	0.232929	0.0371551	-0.127741	0.0687818	0.16449	0.154589	0.0417905	-0.106272	-0.0280446	-0.0420259	0.0842295	-0.0346425	0.0317672	-0.0899847	0.0810119	0.064223	0.060875	PCGF5
ENSG00000100983	CD8T17	0.132942	0.0809508	-0.0424545	-0.0553643	0.00575256	-0.0469431	0.0282121	0.0287893	0.0747689	0.0628689	0.112813	0.0412782	0.110285	0.0249152	0.0632814	-0.101167	0.14148	0.227711	-0.0906217	-0.0626559	GSS
ENSG00000100991	grey	0.0781062	-0.0614851	-0.0122915	-0.117902	0.217942	0.0589342	0.0182376	0.124136	-0.0250805	-0.107866	0.240628	-0.0695355	0.0148817	-0.101494	0.0433428	0.135246	0.0631567	-0.00676714	0.0883826	-0.0180934	TRPC4AP
ENSG00000100994	CD8T8	-0.0527975	0.00384417	0.0198803	0.0879467	0.0144383	0.0666102	0.0673822	0.132709	0.170426	0.0388163	-0.00854028	0.0347604	0.0129508	0.0733562	0.0668746	0.164653	0.0795657	0.0386527	-0.00206847	0.013858	PYGB
ENSG00000069667	CD8T4	-0.024656	0.00310706	0.0994239	0.232918	0.0576637	-0.0408229	0.0547022	0.152574	0.0947726	0.0993887	-0.0940533	-0.00457559	0.087943	0.128983	-0.143376	0.0507842	-0.0441013	0.15278	0.129059	0.0938125	RORA
ENSG00000138698	CD8T4	-0.0704161	-0.00338532	0.0580795	0.232777	-0.0597523	-0.0562553	-0.0126809	0.0844551	0.0958656	-0.0322186	-0.131043	0.0123757	-0.104755	0.0802876	-0.0806501	0.0304559	0.0289907	-0.0312022	0.0750948	0.119188	RAP1GDS1
ENSG00000114423	CD8T4	-0.0322004	0.00297972	-0.166972	0.231594	0.239337	-0.195516	-0.273907	0.0468275	-0.10408	-0.100316	-0.243997	-0.0732884	-0.112418	-0.0211561	-0.180692	-0.179202	-0.228287	0.0448465	0.130299	-0.0365688	CBLB
ENSG00000101040	CD8T7	-0.0628922	-0.111644	-0.0034545	0.0861649	0.0113412	-0.0523118	0.0575052	0.203628	0.114039	-0.012801	0.0190771	-0.0390752	-0.0903557	0.0318492	0.0293295	0.141436	0.0213007	0.0472071	0.0732851	0.118466	ZMYND8
ENSG00000101052	grey	-0.00543889	-0.128126	0.0156957	-0.00424538	0.119301	0.0224364	-0.0385596	0.0959337	0.0181701	-0.0373353	0.0266313	-0.0635294	0.0251266	-0.035952	0.0748788	0.064517	-0.00533539	-0.104234	0.0521585	-0.0383213	IFT52
ENSG00000101079	grey	-0.0540897	0.00210169	0.0345027	0.0671446	0.0468276	0.0317844	-0.0305341	-0.0249988	-0.0101734	0.00210129	-0.0137291	0.0292901	0.0751374	-0.0755639	-0.054782	0.0955997	-0.0729396	-0.00140814	0.0128236	-0.00107395	NDRG3
ENSG00000146433	CD8T4	-0.173241	-0.164857	-0.0446102	0.231562	-0.0243637	-0.00744543	-0.0460826	0.0454266	-0.0904373	-0.0578719	-0.138792	-0.00931498	-0.110172	0.00598192	-0.0221649	0.0145056	0.0345192	-0.111333	0.00224868	0.0167178	TMEM181
ENSG00000101084	grey	0.110828	0.0629347	-0.034978	-0.0119647	0.0784562	-0.0978924	-0.0290847	0.00187082	0.0387789	0.0573393	0.0114257	0.0221779	-0.0493993	0.0252601	0.0548124	-0.0802498	0.0351352	0.0844885	-0.0715719	-0.0102359	RAB5IF
ENSG00000101096	CD8T14	0.0428019	-0.129346	-0.0788956	-0.125636	0.180524	0.196995	-0.0271386	-0.0246724	-0.0824764	-0.0637341	0.105362	-0.0175905	-0.00554305	0.0449789	0.213704	0.00849314	0.163704	-0.0775529	-0.0324747	-0.12914	NFATC2
ENSG00000101104	CD8T18	-0.065574	-0.0629181	0.015295	0.0391218	-0.0922969	-0.0540669	-0.0443698	0.0119475	-0.0438104	-0.028911	-0.0503894	0.0409848	-0.111911	-0.0228096	-0.0406452	0.0119709	-0.0184623	-0.0991547	0.0689841	-0.0152577	PABPC1L
ENSG00000101109	CD8T5	0.144092	0.114107	-0.0919943	0.00391349	0.258556	0.0811507	-0.0187933	-0.0208273	-0.0175196	-0.094089	0.0444701	-0.100107	0.184024	-0.0164666	-0.0156659	-0.0930732	0.0123839	-0.0720594	0.021328	-0.0635303	STK4
ENSG00000101126	CD8T15	0.00307227	-0.0701833	0.0625776	0.0744432	0.0633946	-0.033036	0.00729665	0.06468	0.0220133	-0.142307	0.0237776	-0.0804174	-0.0334424	0.0621654	-0.0861272	0.0585896	0.0183205	-0.0218058	0.00688933	0.0418146	ADNP
ENSG00000101132	CD8T9	-0.0560301	-0.00436573	0.0806755	-0.0113533	-0.0799412	0.0252294	0.214412	0.0266583	0.0200137	0.203146	0.00717163	0.0711825	-0.0349564	0.00562769	0.041379	0.00134879	0.00319973	0.0211202	-0.0455597	0.00678537	PFDN4
ENSG00000101138	grey	0.0279996	0.138092	-0.0241654	0.0205474	0.022954	-0.0237896	0.021198	-0.0465821	0.0849531	0.0185765	0.0221251	-0.0103218	0.0782675	0.0822442	0.0264419	-0.0465299	0.00536732	0.0719316	-0.00456085	0.0802701	CSTF1
ENSG00000101146	grey	0.0295343	-0.0594529	0.0300046	0.0226581	0.0352926	0.0267536	0.240052	0.0353961	-0.0614801	0.14219	0.084579	-0.0298938	0.0040813	0.0897206	-0.0178014	0.0358908	0.111702	0.0775309	-0.0556643	0.0258734	RAE1
ENSG00000101150	grey	0.11944	0.108211	-0.0339779	-0.150061	0.127837	0.143774	-0.013559	-0.112664	-0.0514583	0.0687685	0.153269	-0.0412845	0.208018	-0.130376	-0.071077	-0.0291384	0.000125118	0.0379481	0.0672001	-0.127643	TPD52L2
ENSG00000101152	grey	-0.119133	-0.0359115	0.104206	0.0131464	-0.0796173	0.162392	0.0769831	0.0178009	0.0770211	0.15232	0.0248516	0.209643	-0.042917	0.0418917	0.00813406	0.138262	-0.00861023	-0.0726529	0.134332	0.128523	DNAJC5
ENSG00000101158	CD8T12	0.0929682	0.0622166	-0.0713024	-0.0742558	0.0725706	0.110283	0.0795383	-0.106603	-0.0375716	-0.0056997	0.0623925	0.00563802	0.129637	0.000596855	0.0232684	-0.0690876	0.0368217	0.0447559	0.0239151	-0.0574996	NELFCD
ENSG00000101160	CD8T14	0.0132332	-0.0354448	0.0881457	-0.0672415	-0.03321	0.0774661	0.237786	-0.00232839	0.0878852	0.0732629	0.120923	0.0429301	0.0279692	0.0854685	0.197955	0.181082	0.149742	-0.0275958	-0.0636311	0.0422897	CTSZ
ENSG00000101161	grey	0.126895	0.065832	0.0162531	-0.0313947	0.143426	0.0880237	-0.0451252	-0.0274526	-0.0611566	-0.128027	0.021753	0.00393085	0.0746607	-0.0436109	-0.00366207	-0.00156276	0.00702693	-0.0706175	0.0227148	-0.0771754	PRPF6
ENSG00000101166	CD8T13	-0.0224128	0.0433382	0.0760612	0.150591	-0.0120875	0.0167525	-0.00505663	-0.041864	0.0201996	0.0329523	-0.106603	0.112745	0.0195826	0.0831098	0.0231693	-0.135183	0.0318134	-0.0311436	-0.0531717	-0.0121564	PRELID3B
ENSG00000101181	CD8T17	0.0479189	-0.043802	-0.0834589	-0.0434032	-0.0940215	-0.130992	0.0353058	0.0563784	0.0662671	0.0419228	-0.0263426	-0.0966585	-0.0294455	0.00952877	0.0756936	-0.0478389	-0.00987829	0.0966353	-0.157466	-0.0536662	MTG2
ENSG00000101182	grey	0.11427	0.155032	0.0535483	0.0148288	0.0181937	0.0805876	-0.0417508	0.0200234	0.0745491	-0.0644334	0.00505849	0.0638664	0.110388	0.0730886	0.00634439	0.0296039	0.0927184	0.109714	0.0103294	-0.121471	PSMA7
ENSG00000101191	grey	0.0199514	-0.0119244	0.091291	-0.0118822	-0.0350924	0.0242687	0.143865	0.0970242	0.11716	0.0488472	0.110588	0.0398398	0.0485805	0.113722	0.0339175	0.0310836	0.165463	0.096818	-0.0040691	0.0226207	DIDO1
ENSG00000101193	CD8T19	-0.00112967	0.13442	0.0704702	0.0597145	-0.0741967	0.0181767	0.15106	0.0585416	0.0758783	0.0721684	-0.0202364	0.0965086	0.0548385	0.0624142	0.1237	0.114119	-0.00253945	0.133207	0.0568052	0.179498	GID8
ENSG00000101199	grey	-0.0255548	0.0662755	0.0867575	0.0518631	0.0079968	0.00457326	0.116474	0.101803	0.0576338	0.109505	-0.0418523	0.174658	-0.0449859	0.0678152	-0.0133274	0.0350261	0.0831807	0.0227019	0.0621644	0.0405942	ARFGAP1
ENSG00000101216	grey	-0.139654	-0.0773047	-0.0114744	0.0294311	0.00245548	0.0316328	0.196063	0.0699365	-0.017309	0.210512	0.0816251	0.0391216	0.0936981	-0.0125689	0.094511	0.0856615	-0.0714583	-0.043511	0.0277086	0.115311	GMEB2
ENSG00000101224	grey	-0.124562	-0.185317	-0.00786104	0.0353578	0.0661991	0.0370252	-0.0257135	0.0202643	-0.0516482	0.0702002	-0.0497206	0.00848839	-0.112891	-0.0698246	-0.116485	0.080789	-0.0492426	-0.140068	-0.0240357	0.00598168	CDC25B
ENSG00000101236	grey	-0.0550529	-0.0153609	0.0157556	-0.0185884	0.131261	0.0586205	0.00962413	-0.0592232	-0.0117506	0.000606616	0.0753924	-0.0477442	0.0429733	-0.109861	0.0102624	0.0559501	-0.0282124	-0.0132742	-0.00124538	0.0470389	RNF24
ENSG00000101246	CD8T15	-0.121026	-0.079654	0.0919007	-0.00651935	-0.0369973	-0.0208825	0.0666691	0.0788628	0.0768661	0.0316104	0.0025755	0.128432	-0.019099	0.00804962	0.00444292	0.156792	0.063027	0.0222007	-0.00959296	0.115358	ARFRP1
ENSG00000101247	CD8T16	0.069145	-0.0463634	0.077886	-0.0922016	-0.104334	0.113387	0.0725562	0.0330716	0.144037	0.0188947	0.0862349	0.114735	-0.0384656	0.0541656	0.0636814	0.0528687	0.19476	0.0694715	-0.053641	0.0736855	NDUFAF5
ENSG00000101265	grey	0.152325	0.12426	-0.129375	-0.106247	0.0166783	0.0123268	0.0101821	-0.0977448	-0.0327492	-0.046293	0.0692114	-3.28025e-05	0.0764508	-0.0315747	0.0306479	-0.0850686	0.00682705	-0.00370035	-0.0328788	-0.111414	RASSF2
ENSG00000101266	grey	-0.0109444	0.0665221	0.0843557	0.0953704	-0.0153453	0.0527487	0.0850988	0.0117595	0.0104834	0.0254311	-0.0656829	0.158543	-0.0257925	0.0868521	0.0391905	0.108352	0.0118887	-0.0376878	0.0735267	0.102843	CSNK2A1
ENSG00000101290	CD8T12	-0.0576113	-0.0329099	-0.0248982	0.0327027	-0.0295001	0.00217292	0.0123412	0.0643318	0.0795523	-0.0026238	0.0174986	0.0537109	0.142879	-0.0668249	0.028319	-0.00566026	-0.0119662	-0.0298195	0.0417467	0.103377	CDS2
ENSG00000101294	grey	0.0406186	0.0331755	0.154242	0.0806655	-0.00947644	0.0953355	0.0738801	0.104662	0.0737116	-0.00323495	-0.0263165	0.0936066	0.0216142	0.0476774	0.05049	0.14212	0.0701607	-0.102725	0.0557479	0.183376	HM13
ENSG00000101310	grey	0.0922593	0.116517	-0.0653912	0.0236919	-0.00928011	0.00425198	-0.00580223	-0.00357528	-0.0369555	-0.0505033	-0.0694241	0.0579744	0.019576	0.00973772	-0.0122299	-0.0869004	0.0679851	-0.0221973	0.0516911	-0.00648141	SEC23B
ENSG00000101333	grey	0.0015513	-0.013726	0.0206088	0.0391963	-0.0071831	-0.0803887	0.0175062	0.0593646	-0.0132408	0.0228793	0.0195888	0.0409444	-0.0116218	0.0461148	0.0270471	0.0394734	0.0167453	0.0507985	-0.00898476	-0.0564792	PLCB4
ENSG00000101336	grey	-0.0405584	0.0176115	-0.0509727	0.0312068	-0.00800246	-0.00947194	0.257901	0.0265789	0.0416196	0.149334	0.0394537	0.00956388	0.00546724	0.0562105	-0.0115704	-0.017838	0.0123659	0.129794	-0.0480038	0.0477948	HCK
ENSG00000101337	grey	0.0368897	0.0942211	0.0336472	0.00187599	-0.0519736	-0.0225095	0.130252	0.0715117	0.0178162	-0.0320649	0.0570998	-0.00313072	0.0213126	0.0846162	0.0548576	0.0231295	0.0822572	0.0912226	0.0192035	0.0485684	TM9SF4
ENSG00000101343	CD8T13	0.00321726	0.0945012	0.0305424	0.161845	0.0506104	0.0299402	-0.00267262	0.00204449	0.0871144	0.0721899	-0.0945295	0.166943	0.00833172	0.14247	0.0954661	0.00255727	0.0549963	0.0967398	-0.0303674	0.0561099	CRNKL1
ENSG00000101346	grey	0.0596487	0.0957611	0.0386771	0.0567276	-0.0267293	0.0763194	0.0660766	0.0442839	0.00571468	-0.0232238	-0.0523535	0.0414898	0.036442	0.0081967	0.027037	0.0723554	0.0177852	-0.0406162	-0.0217074	0.0785067	POFUT1
ENSG00000101347	grey	0.138588	0.120861	0.0476577	-0.0943209	0.0523266	0.116296	0.0507737	-0.0688186	0.0292299	0.12168	0.19351	0.207536	0.24354	0.124038	0.170438	-0.0127357	0.0606943	0.230512	-0.0950658	-0.0511604	SAMHD1
ENSG00000101349	grey	-0.0386713	-0.102765	-0.0731002	-0.0100385	-0.023916	-0.00992004	0.104812	0.0372678	0.0272435	-0.00984381	0.132128	-0.197073	0.0308919	0.0309955	-0.0689512	0.0888798	-0.0260145	-0.0678588	0.0224197	0.00170464	PAK5
ENSG00000101350	grey	0.0954617	-0.026383	0.0384394	0.0289681	-0.0756818	-0.00652626	0.0551402	0.111296	0.00670203	-0.027818	0.0141598	0.0551185	0.0229696	0.0150806	0.0165285	0.125461	0.0952904	0.0736777	0.12388	0.0607315	KIF3B
ENSG00000101361	grey	0.13304	0.117965	0.0138005	-0.127302	0.0251246	0.0717757	0.0528579	-0.105939	-0.106983	-0.00279529	0.0809762	0.0290823	0.148968	-0.0639621	-0.0853917	-0.022683	0.0246683	-0.0948196	0.0778629	-0.0714733	NOP56
ENSG00000101363	grey	-0.0344722	-0.113574	-0.0491662	-3.34767e-06	-0.00647884	0.0830768	0.154993	0.132659	0.106861	0.0310937	0.0627633	0.0654594	-0.0189367	0.0743785	0.0223614	0.12924	0.133551	-0.0186015	-0.0369675	0.0909616	MANBAL
ENSG00000101365	grey	0.095377	0.138132	-0.0411404	-0.072335	0.0979486	0.00462998	-0.035894	-0.0942601	-0.138751	-0.0299824	0.0580265	-0.0225575	0.10478	-0.0665435	0.00976172	-0.0547265	-0.0959072	0.0382809	0.0242586	-0.0561486	IDH3B
ENSG00000101367	CD8T3	-0.0124327	-0.00600852	0.0799562	0.0219339	0.00190328	0.0583396	0.00884311	0.0116843	0.0269144	0.063259	0.00215382	0.0926897	-0.0281244	0.0120704	0.0106275	0.0282288	0.0270807	-0.0682476	0.000281228	0.0212755	MAPRE1
ENSG00000101391	CD8T19	-0.0779242	-0.0391573	-0.00818395	0.241004	-0.112385	-0.0342146	-0.0131469	0.088745	0.151641	0.0483968	-0.174183	0.00859924	-0.0979253	0.0689497	-0.0521769	0.0288195	-0.0745005	0.0053818	0.114507	0.150208	CDK5RAP1
ENSG00000101400	grey	-0.0294434	0.0937627	0.0745358	0.11132	-0.108211	-0.037767	0.0129421	0.0114797	-0.0443795	0.0512747	-0.10614	0.0296469	-0.053739	-0.0401129	0.0456907	0.00233366	-0.0854359	-0.052809	0.00598797	0.0727045	SNTA1
ENSG00000101407	CD8T3	-0.111247	-0.0130837	0.298047	0.0334088	-0.0325008	0.137616	0.00558318	0.018149	0.0355709	0.0791249	0.0477748	0.109162	-0.0468835	0.049477	-0.00441084	0.0339928	0.0830919	-0.0910353	0.061997	0.0507163	TTI1
ENSG00000101413	CD8T5	-0.0488762	-0.170859	0.131713	0.0261676	0.0566109	0.136681	0.0753988	0.101614	-0.0212503	0.0234645	0.0711549	0.0216067	0.077439	0.0908876	0.0309186	0.071069	0.083477	-0.0615734	0.0651312	0.0540328	RPRD1B
ENSG00000101421	grey	-0.0703992	-0.00123002	0.0943887	0.0842671	-0.136844	-0.0452466	-0.00494235	-0.0240146	-0.0402207	0.0921371	0.00433559	0.0529627	-0.00376994	0.0401337	-0.024045	-0.00486701	-0.0222754	-0.0297662	-0.0422695	0.0526849	CHMP4B
ENSG00000101439	grey	-0.0435693	-0.0439706	0.000620892	-0.0562124	0.0787739	-0.0472481	0.151686	-0.0526351	0.0513306	0.09147	0.0593599	-0.0884838	0.0479978	-0.0281537	-0.000293742	-0.0314029	-0.0706191	0.0490213	-0.0121795	-0.0978231	CST3
ENSG00000101442	grey	-0.0045719	0.0323338	0.031706	-0.0227963	-0.0494005	0.0270246	-8.03351e-05	0.00444872	0.0365385	0.0473952	0.00612989	0.0833764	0.0736312	-0.0382523	0.0785036	-0.011326	-0.0484788	0.0521074	-0.00405044	0.0679077	ACTR5
ENSG00000101445	CD8T5	0.156095	0.0679039	-0.255078	-0.0120019	0.467278	-0.0384364	-0.0496278	-0.0764798	-0.121676	-0.0658564	-0.0223009	-0.161943	0.186578	-0.0852362	-0.0715688	-0.151642	-0.114787	0.0585302	0.148925	-0.169534	PPP1R16B
ENSG00000101452	CD8T8	-0.0691469	-0.0890867	0.0801625	0.00617219	-0.128097	0.0487837	0.0292704	0.0242632	0.0987673	0.022176	0.0393065	0.0445581	0.0472229	0.0891208	0.0483651	0.0648463	0.0783014	-0.0620905	-0.00251479	0.0651544	DHX35
ENSG00000101457	grey	0.0531693	0.133807	0.00467274	0.00423615	-0.0504489	0.0831241	-0.0601281	-0.0104461	0.0170811	-0.00139268	-0.04405	0.0179971	-0.0165191	-0.0360599	0.0819506	-0.0391212	0.0279825	0.00166722	0.0143131	-0.0241822	DNTTIP1
ENSG00000101463	grey	-0.1464	-0.106734	0.196329	0.0308884	-0.11091	0.00290134	0.357873	0.0884116	0.128683	0.237755	0.116566	0.0827379	0.0214863	0.0409947	0.111061	0.172428	0.0366535	-0.0244294	0.077362	0.192776	SYNDIG1
ENSG00000101464	CD8T10	-0.0589668	-0.0779453	-0.0503672	-0.0324269	0.0602136	0.167525	0.203608	-0.0169341	0.125047	0.134171	0.131118	-0.0174527	0.144302	0.00150582	0.106524	0.0396017	0.118351	-0.0744029	-0.090937	-0.015617	PIGU
ENSG00000101473	CD8T17	0.141591	0.0557183	-0.0614349	0.0162606	0.0927412	-0.091897	-0.0161916	0.000574667	0.0680765	-0.0855983	0.0761583	-0.0344575	0.115741	0.0253651	-0.050412	-0.0804476	0.02364	0.229169	0.0686221	-0.0735826	ACOT8
ENSG00000101474	CD8T10	0.10249	0.0621607	-0.153767	-0.168285	0.180466	0.0417321	-0.0727938	-0.0289219	-0.0981298	-0.143991	0.162285	-0.11086	0.0859645	-0.140991	0.0365473	0.00449779	-0.0665922	0.0278096	0.0659722	-0.132487	APMAP
ENSG00000101489	grey	0.052488	0.023638	0.127998	-0.104535	0.0965903	0.0465121	0.154803	-0.058672	0.134694	0.152883	0.120496	0.0368225	0.135189	0.0314985	0.127407	0.0119583	0.0199115	0.151442	-0.00117862	0.133156	CELF4
ENSG00000256235	CD8T4	0.0370855	0.176947	0.115109	0.231448	-0.032326	-0.0333057	0.0500994	-0.033857	0.00517711	0.168981	-0.138038	0.217469	-0.0454379	0.203823	0.00684125	-0.0910429	0.0412077	0.0706778	-0.0607403	0.00253646	SMIM3
ENSG00000101542	grey	-0.035796	-0.080071	0.0722238	0.00466783	-0.129269	0.0123303	0.21216	0.128354	0.124326	0.21788	-0.0148256	0.075319	-0.144098	0.110344	0.065919	0.0761112	0.138772	0.0241446	-0.0787143	0.178722	CDH20
ENSG00000101544	grey	-0.0175216	-0.0084773	0.0190523	0.0854835	-0.0382842	0.0438652	0.0282994	-0.0178091	0.0694916	-0.0146189	-0.0949897	0.117814	-0.0743664	-0.0409167	-0.0483687	0.0779416	0.0567636	0.0230366	-0.0234843	0.0432965	ADNP2
ENSG00000180479	CD8T4	0.00341623	0.0429612	-0.0257586	0.231201	0.0353743	-0.0351191	0.0710611	0.0828246	0.0595806	0.124511	-0.0763305	0.0518799	-0.0289467	0.0847582	-0.0632164	0.0419523	0.0626775	0.133226	0.0827844	0.0695966	ZNF571
ENSG00000101558	grey	0.0243645	-0.156167	-0.1047	-0.0485045	0.193256	-0.0544663	-0.141645	0.00695312	0.063034	-0.164243	0.0956631	-0.142648	0.0610822	-0.0443783	0.0848265	-0.0140905	0.0426539	0.0206584	-0.0878586	-0.081912	VAPA
ENSG00000101574	grey	0.0837142	0.107125	-0.00672998	0.111039	0.196125	-0.0170503	-0.0521989	-0.0675719	-0.0441669	-0.0752498	-0.0968232	0.114558	-0.0561531	0.0237282	-0.142172	-0.0672366	-0.0192477	-0.0710753	0.152497	0.0570672	METTL4
ENSG00000101577	grey	0.0388703	-0.00783029	-0.0416916	0.11152	0.15196	0.0753916	0.0693617	-0.0102777	-0.0165184	0.0473626	-0.0444374	0.0148274	0.0455604	0.0480152	-0.0645124	-0.0616716	-0.0763803	0.0405096	0.0551683	0.0571155	LPIN2
ENSG00000101596	CD8T5	0.159004	0.0700471	-0.117481	0.0207521	0.365693	0.00413297	-0.0659268	-0.0713418	-0.04358	-0.0816211	0.0755045	-0.0939323	0.162348	-0.100439	-0.132951	-0.0828941	-0.138324	0.0893417	0.156378	-0.135782	SMCHD1
ENSG00000101605	grey	-0.0721748	-0.0549909	0.0719728	0.0819378	-0.0159198	-0.0235861	-0.0482517	0.134622	0.0230916	-0.0189543	-0.0592353	0.0328553	-0.100339	0.0332699	0.0112854	0.0817118	-0.00177592	-0.0450089	0.126903	0.0737884	MYOM1
ENSG00000140264	CD8T2	0.240512	0.454036	0.0647194	-0.0811595	0.0268713	0.19562	0.108485	-0.120099	0.103998	0.139307	0.104529	0.154199	0.178678	0.0349154	0.116834	-0.00597922	0.129866	0.173189	-0.0255166	-0.0237937	SERF2
ENSG00000101624	grey	-0.0212507	-0.0114095	0.0375124	0.0863775	0.134525	0.0148462	-0.0897313	-0.0629767	-0.0943109	-0.0285005	-0.0437249	-0.0526874	0.124287	-0.0347769	-0.0952872	-0.0405711	-0.0271727	-0.0459355	0.0474161	-0.11304	CEP76
ENSG00000101638	CD8T9	-0.0579198	0.0386165	0.0152925	0.0717184	-0.0263538	0.005868	0.0742662	0.101037	0.0928065	0.107278	-0.0245818	-0.103703	0.0618757	0.0541136	0.0375634	-0.0100155	0.00236283	0.0670846	-0.0303402	0.0428488	ST8SIA5
ENSG00000101639	grey	0.0350717	-0.162967	-0.0173308	-0.0487496	0.0708388	0.117765	0.123802	0.113994	0.0216636	0.000890857	0.185655	0.0757766	0.0993553	0.0729764	0.198843	0.212493	0.118626	-0.0304884	0.0720056	0.0924425	CEP192
ENSG00000101654	CD8T9	0.0330613	0.0839033	0.0893136	-0.0304409	-0.0169158	0.0696141	0.150863	-0.0420582	0.117584	0.281881	0.0771666	0.137332	0.0691528	0.125463	0.0983198	0.0353849	0.0458686	0.123898	-0.00158126	0.0739742	RNMT
ENSG00000101665	grey	0.0264333	0.0591148	-0.0604619	-0.00939903	0.0248003	0.0222969	-0.0412701	0.0175108	-0.107985	-0.0109262	0.0418292	0.0678163	0.070642	-0.0560168	0.141212	0.011927	0.0183223	-0.068021	0.0118718	-0.0597628	SMAD7
ENSG00000101695	CD8T18	0.00299819	-0.00528242	0.0111116	0.0953394	0.111776	0.0699785	0.00480307	0.0780632	-0.0194269	-0.0897224	0.0232407	0.0599747	-0.036366	0.00726611	-0.0686984	0.0455858	0.0699835	0.0332266	0.17456	0.00815388	RNF125
ENSG00000101745	CD8T16	0.0531702	-0.0884495	0.0175358	-0.0659387	0.0182512	0.0464631	0.0490091	-0.0144637	0.0513856	-0.000271121	0.123983	0.0608426	0.0242402	0.18193	0.0471936	0.108189	0.183557	0.0334997	-0.0988706	-0.0210238	ANKRD12
ENSG00000101746	grey	-0.0454378	-0.0582713	0.0390179	-0.034784	-0.0671724	0.0102417	-0.0235285	-0.100007	-0.0985529	0.0760016	-0.0618468	0.0195349	-0.0822819	-0.0850473	-0.0845508	-0.0279171	-0.0255172	-0.0416404	0.024704	0.0708784	NOL4
ENSG00000101751	grey	0.0051967	-0.0919896	0.145685	-0.000232326	0.0149912	0.159571	0.119057	-0.0491299	-0.0395343	0.0592266	0.0645909	0.119841	0.00549404	0.063435	0.125968	0.0664856	0.18554	0.0104606	0.0628833	0.0216092	POLI
ENSG00000101752	grey	0.0310489	0.0137056	0.0247961	-0.118736	-0.0473803	0.0478805	0.00741646	0.101187	0.0574915	-0.0486288	0.0671669	-0.00541333	0.00265076	-0.037336	0.111915	0.164984	0.103376	0.0967202	0.029315	-0.0913474	MIB1
ENSG00000101773	CD8T1	0.101452	0.0325071	-0.0532275	0.0322944	-0.0764868	0.000782407	4.02897e-05	-0.0694289	-0.000627789	0.0304011	-0.0209554	0.073841	0.0611751	-0.0110425	-0.0521225	-0.04177	-0.00720156	0.0617908	-0.0241702	-0.0839701	RBBP8
ENSG00000101782	grey	0.0262157	0.0178309	0.0443421	-0.0758619	0.051724	-0.0481443	-0.0570937	-0.0697987	-0.0532004	-0.0042575	0.0166914	-0.0163654	-0.053377	-0.00247936	-0.00297808	0.00308853	-0.0419716	-0.00457694	0.00808218	-0.0980618	RIOK3
ENSG00000101844	CD8T17	0.130984	-0.0826434	-0.00644874	-0.0300372	0.0138932	0.0180279	0.00195632	0.0140949	0.0521486	0.0225405	0.133377	-0.0261637	0.102363	0.0922369	0.0756934	0.0746113	0.10334	0.109296	-0.0449366	-0.079337	ATG4A
ENSG00000101846	CD8T9	-0.045995	-0.0346176	0.0458094	-0.0337425	0.0798272	0.0769882	0.0427673	0.0805573	0.0686576	0.130621	0.0738436	0.0432034	-0.0409575	0.0721396	0.172157	0.0670436	0.0815036	-0.00131834	0.0202708	-0.0319943	STS
ENSG00000101849	CD8T15	-0.0148821	-0.0266008	-0.0115338	0.00748372	0.170327	-0.0335844	-0.0733024	0.00349919	0.0138091	-0.0991521	-0.0330899	-0.0673244	-0.0667677	-0.0630987	-0.0917832	0.079957	-0.0553059	0.00929182	0.103231	-0.0505984	TBL1X
ENSG00000101856	grey	-0.044352	-0.0752145	0.0433757	0.00316447	-0.0563687	-0.00427145	0.00540169	0.0979989	0.0162643	0.0594905	0.00846157	0.0254905	0.0158967	0.00733482	0.00227299	0.051221	0.0295832	0.0356635	-0.0157884	0.105873	PGRMC1
ENSG00000101868	CD8T16	0.00453925	0.0198973	0.009749	-0.0608111	0.00670672	0.0282888	0.0767182	0.00254242	-0.0531794	0.0748562	0.102642	-0.0100104	0.0186726	0.0117797	0.0970824	0.106729	0.0663841	0.0194109	0.00545931	0.0303385	POLA1
ENSG00000047849	CD8T4	-0.200849	-0.00873299	0.145918	0.230143	-0.0993715	-0.0677715	-0.00925293	0.140995	0.154435	-0.00190736	-0.169157	0.0599859	-0.183446	0.0062698	-0.0235711	0.0919503	-0.134617	-0.0226874	0.0782815	0.135967	MAP4
ENSG00000101901	grey	-0.0363124	-0.0905993	-0.0365853	0.0487756	0.0399645	-0.0310664	0.0582971	0.0119841	0.0512626	-0.0331474	0.0557742	-0.0369491	-0.0654391	0.0543954	-0.0279114	0.0711262	0.00808915	0.0129332	0.0371427	0.059539	ALG13
ENSG00000101911	grey	-0.0913646	-0.0946702	0.00420779	0.00809963	0.000216885	0.00148348	-0.095328	-0.0216971	-0.104561	-0.02041	0.031379	-0.102159	-0.0700595	-0.0987988	-0.131663	-0.0205211	-0.126415	-0.125488	0.0232716	-0.0483526	PRPS2
ENSG00000101928	CD8T16	0.0942444	-0.00908396	0.0295704	-0.133081	-0.0134753	-0.0259039	-0.0415094	-0.0434547	0.0808827	-0.0443719	0.0871285	-0.0789202	0.0532137	0.0130905	0.0212597	-0.0555518	0.0177984	0.0997877	-0.0660441	-0.0547407	MOSPD1
ENSG00000101935	CD8T12	0.00994947	-0.0298237	-0.0410525	-0.0151164	0.113828	0.056717	0.0785235	0.0700801	0.0366505	-0.0287095	0.0332214	-0.0510741	0.0280661	0.0378557	0.0170499	0.0703275	0.0863858	0.0801862	0.052238	0.0240058	AMMECR1
ENSG00000089159	CD8T4	-0.0455412	0.0609934	0.137909	0.228922	-0.109931	-0.081865	0.00583552	0.135988	0.253751	0.0205501	-0.161584	0.114071	-0.0700156	0.0421555	-0.0952405	0.060917	0.0448388	0.0425777	0.113248	0.197647	PXN
ENSG00000101966	grey	-0.07595	-0.0813051	0.0513977	-0.0113585	-0.0434802	-0.0337555	0.0256706	0.021724	0.00998148	-0.00206962	0.0139034	0.0395891	0.0348805	0.0526252	-0.0144724	-0.000645692	-0.0320133	-0.0470297	-0.0454548	0.110186	XIAP
ENSG00000101972	grey	0.0131446	-0.00452521	-0.00486873	0.063756	0.174531	0.0258981	0.0605564	0.0682735	-0.0229645	-0.095344	-0.00410006	0.05526	0.0526093	-0.0828338	0.0211026	0.0345545	0.0119245	-0.026856	0.0543475	-0.012572	STAG2
ENSG00000101974	CD8T17	0.074086	0.0397217	-0.0775222	0.0657997	0.0301191	-0.0905086	0.0261864	0.0914499	0.0267368	-0.0735603	0.0487121	0.0608597	0.0268484	0.123374	0.0876531	-0.0321415	0.056678	0.180944	-0.0293637	-0.0687608	ATP11C
ENSG00000101977	CD8T10	0.109649	0.00868761	0.0383831	-0.0568378	0.0216858	0.111623	0.121031	-0.00599593	0.00842881	0.145997	0.227919	0.0389618	0.122238	0.0807208	0.0903312	-0.0236787	0.133993	0.0547077	-0.056826	-0.0206609	MCF2
ENSG00000102003	grey	-0.0852322	-0.0811601	0.1113	-0.0419602	-0.0335929	0.0309018	0.07024	-0.0594906	0.0276009	0.174543	-0.00653708	0.0950132	0.0101487	-0.00189782	0.0459843	0.0338313	-0.0300342	-0.0550832	0.0304025	0.129301	SYP
ENSG00000121966	CD8T2	0.323004	0.45181	0.0209483	0.0640809	0.106456	0.12161	-0.0624237	-0.162803	-0.0388548	-0.0241765	-0.11776	0.146492	0.166119	0.00908853	-0.103784	-0.133108	-0.0167585	0.0749838	0.157498	-0.00361995	CXCR4
ENSG00000102030	grey	0.0104832	0.0825928	-0.0220587	0.0431579	0.0908045	0.016263	-0.0581278	-0.0179915	-0.0686665	0.0140302	-0.0331226	-0.0613622	-0.0119269	-0.140438	-0.110781	0.00275475	0.0126147	-0.0233779	0.0242646	-0.0958575	NAA10
ENSG00000102034	CD8T13	-0.0254006	-0.0944868	0.00500221	0.0296113	-0.0243518	0.0134236	-0.00234412	0.00154358	-0.0444496	0.0198849	-0.0735266	-0.0264383	-0.133988	0.0748652	-0.124273	-0.0157097	0.0376464	-0.0169518	-0.00381279	0.0630393	ELF4
ENSG00000123908	CD8T4	-0.0487999	0.0295651	0.0401052	0.228372	0.102626	-0.00229125	-0.0463407	0.0859833	0.0820282	-0.0397913	-0.0879199	0.0397699	-0.0951117	0.0319357	-0.0721294	0.116941	0.0510453	-0.0302161	0.112092	0.1109	AGO2
ENSG00000102053	CD8T13	-0.0225274	0.0696623	0.0599392	0.136691	-0.0798532	-0.0432428	0.179888	0.0924102	0.119705	0.215547	-0.0698319	0.0957325	0.0710553	0.243705	0.0417357	-0.0389061	-0.0230046	0.105513	-0.0978754	-0.0264742	ZC3H12B
ENSG00000102054	grey	0.0415394	0.0107574	-0.0680734	0.0370336	0.0359183	-0.102879	0.0192966	0.00736012	-0.0643964	-0.02366	-0.0418171	0.0296225	0.062971	0.0150348	-0.0886403	-0.0161106	0.0597227	0.0995561	0.0446055	-0.00263901	RBBP7
ENSG00000213741	CD8T2	0.274579	0.445902	0.0484226	0.000790052	-0.101338	0.139895	-0.0479123	-0.0673838	-0.00845066	0.116404	-0.0266866	0.272621	-0.0127524	0.139236	0.113165	-0.101179	0.153017	0.0291019	-0.0703523	-0.0238612	RPS29
ENSG00000102096	grey	-0.0429052	0.0263771	0.0139349	0.0798228	-0.0563528	-0.0345569	-0.0151749	0.0125237	0.0545651	0.00174262	-0.0777625	0.0728466	-0.0269684	0.00431755	-0.0204556	-0.0294928	-0.0281765	-0.022624	-0.0428075	0.149223	PIM2
ENSG00000102109	grey	-0.0534205	-0.00896018	-0.0391141	-0.013717	0.00360695	0.0128181	0.0164382	-0.081508	0.00322797	0.039988	-0.0731956	0.0806573	-0.121351	0.0209619	-0.0540969	-0.0338668	0.076047	-0.0342873	0.0426018	0.0734477	PCSK1N
ENSG00000102125	CD8T12	0.0131452	0.00445317	0.0588116	-0.0836605	0.0311479	0.0117108	-0.075963	-0.146826	0.0164893	-0.103894	0.0259904	-0.00829972	0.0596775	-0.127597	-0.00777277	-0.0639941	-0.119956	0.0706081	-0.000857808	-0.0691833	TAFAZZIN
ENSG00000102401	CD8T4	-0.0554369	0.0821195	-0.0228762	0.22792	0.00532355	-0.16944	0.11188	0.166162	0.0781135	0.0210894	-0.126295	-0.0693866	0.0129607	-0.00123308	-0.13385	0.0439142	-0.156691	0.130255	0.213269	0.130379	ARMCX3
ENSG00000102158	grey	-0.11067	0.0619259	0.100862	0.0357693	-0.174169	0.0649314	-0.0415214	-0.0537514	0.119612	0.0955451	-0.0392478	0.104121	-0.111039	-0.0338908	0.07981	0.0357995	0.0525546	0.0109787	-0.0537505	0.0928584	MAGT1
ENSG00000102172	CD8T8	-0.0628769	-0.0833902	-0.0103368	-0.0217202	-0.025106	-0.0109045	-0.00250552	0.0854939	0.150563	0.0518885	-0.0257482	0.0235559	-0.124344	0.119495	-0.0126118	0.115555	0.0393015	0.0220975	-0.0252784	0.0631542	SMS
ENSG00000102181	grey	0.0117378	-0.0323663	0.0552992	0.0451445	-0.138641	-0.0760741	0.0301806	-0.0421276	-0.0458776	0.0118388	-0.0212279	0.0393843	0.00827572	0.11674	-0.0822813	0.00583919	0.0542132	-0.0906212	-0.0460392	0.0707715	CD99L2
ENSG00000102189	grey	0.0721989	0.122278	0.0733748	-0.0104189	0.0104684	0.0178211	0.110073	-0.0424147	0.0561121	0.0400554	0.0606996	0.117757	0.113912	0.126842	0.0583628	0.00255554	0.0792435	0.0512743	-0.0335995	0.0120746	EEA1
ENSG00000102218	CD8T13	0.0363099	0.0596636	0.112402	0.0914503	0.00940295	-0.0513258	-0.0351408	0.0269734	-0.00340499	0.0113714	-0.0121709	0.065965	0.0464097	0.0809221	-0.0659392	-0.0441271	-0.0493313	0.0375093	0.0634468	-0.0111731	RP2
ENSG00000102225	grey	-0.0373109	-0.0555775	0.0384326	-0.0300157	0.00785102	0.0185021	0.0386242	0.00646622	-0.0149022	-0.0418519	0.0394139	0.0455337	0.00396853	-0.106492	0.118914	0.0493998	0.076888	0.00563825	-0.0102875	0.0305378	CDK16
ENSG00000102226	CD8T1	0.174059	0.0677741	-0.0217346	-0.09174	0.0428742	0.105499	-0.0708323	-0.115403	-0.0690447	-0.00246802	0.0820534	-0.00954775	0.109092	0.0919187	-0.0827004	-0.119503	0.162161	0.0320331	-0.0924488	-0.161938	USP11
ENSG00000177200	CD8T4	0.01532	0.0441877	0.114826	0.227714	-0.0386464	0.0038175	0.0835944	-0.0363085	-0.0554536	0.0429504	-0.157582	0.15273	-0.00166643	0.0910722	-0.0752298	-0.0221698	-0.0069265	-0.0857801	0.109326	0.0462044	CHD9
ENSG00000102245	CD8T5	0.0446326	-0.0313099	0.0585982	-0.00666031	0.228102	0.209964	0.0627547	-0.00707926	-0.0700044	-0.0552291	0.0944789	-0.0484065	0.0585417	-0.105743	0.0243582	0.094299	0.0131515	-0.149615	0.171582	-0.0180662	CD40LG
ENSG00000102271	grey	-0.0322535	-0.129294	-0.0594647	-0.133837	0.0303528	-0.0219505	0.051562	0.0516703	0.0356353	0.0585697	0.140482	-0.0881593	0.0379327	-0.0506814	0.0579873	0.0348585	0.088739	0.0257002	-0.0746382	-0.0526293	KLHL4
ENSG00000102290	grey	0.00966337	-0.0462994	0.0143469	-0.0336684	0.0474839	0.0272657	0.0352229	0.137755	0.111441	0.0372295	0.0752786	0.0618116	0.0151019	0.146572	0.139413	0.0955704	0.0522235	0.124612	-0.0335867	-0.0104444	PCDH11X
ENSG00000102309	grey	-0.00376549	0.0163328	0.115002	0.0674652	0.00587713	0.10154	0.0733755	0.0222482	-0.0555126	0.128068	0.00615891	0.106416	0.0551798	0.161661	0.0224351	-0.0484641	0.0728501	0.0267996	-0.0167284	0.155624	PIN4
ENSG00000102316	grey	0.172085	0.235495	0.0700855	0.0340958	0.207426	0.0865843	-0.038673	-0.0296344	0.0836571	-0.00380825	0.086948	0.13238	0.120929	-0.00286741	0.0635823	-0.0162116	0.100321	0.0984708	0.0327707	-0.00527465	MAGED2
ENSG00000102317	grey	-0.0562159	-0.0226483	0.122071	0.0682722	-0.0661617	0.0334623	0.092794	0.0379409	0.0810191	0.0133218	-0.0484056	0.0527052	-0.0416225	0.0639784	-0.101545	0.154226	0.114072	0.0295174	-0.00517696	0.152915	RBM3
ENSG00000166979	CD8T4	-0.152993	-0.0770863	0.11471	0.226881	-0.151358	-0.0695928	0.00482721	0.0800272	0.0400103	-0.0199201	-0.106926	0.0243519	-0.171687	0.0151103	-0.143716	0.0841709	-0.0296164	-0.0720745	0.0470867	0.177242	EVA1C
ENSG00000102409	CD8T15	-0.0794608	-0.0297385	0.0944787	-0.00512364	0.0797749	-0.0402557	0.0635891	0.0267392	-0.0239875	0.124243	0.00481699	-0.0044589	-0.0358374	-0.0896172	-0.0635427	0.179882	-0.0814821	-0.0375837	0.161828	0.0683185	BEX4
ENSG00000102452	grey	-0.0211316	-0.0288077	0.113178	-0.0586599	0.0541007	0.0759233	0.128922	0.102269	0.207601	0.208258	0.114451	0.021922	-0.030737	0.12433	0.0451375	0.150266	0.11907	0.104079	0.0462768	0.0288099	NALCN
[truncated: 8,348 more rows]

## Sheet: Supplementary Table S5
mod	db	Term	P.value	Adjusted.P.value	Old.P.value	Old.Adjusted.P.value	Odds.Ratio	Combined.Score	Genes
[truncated: 254 more rows]

[truncated: 5 more sheets: Supplementary Table S6, Supplementary Table S7, Supplementary Table S8, Supplementary Table S9, Supplementary Table S10]
