# Supplementary figures and images for: Cell States and Interactions of CD8 T Cells and Disease-Enriched Microglia in Human Brains with Alzheimer’s Disease
Source: MDPI journal article supplement (doi:10.3390/biomedicines12020308), 2024-01-25

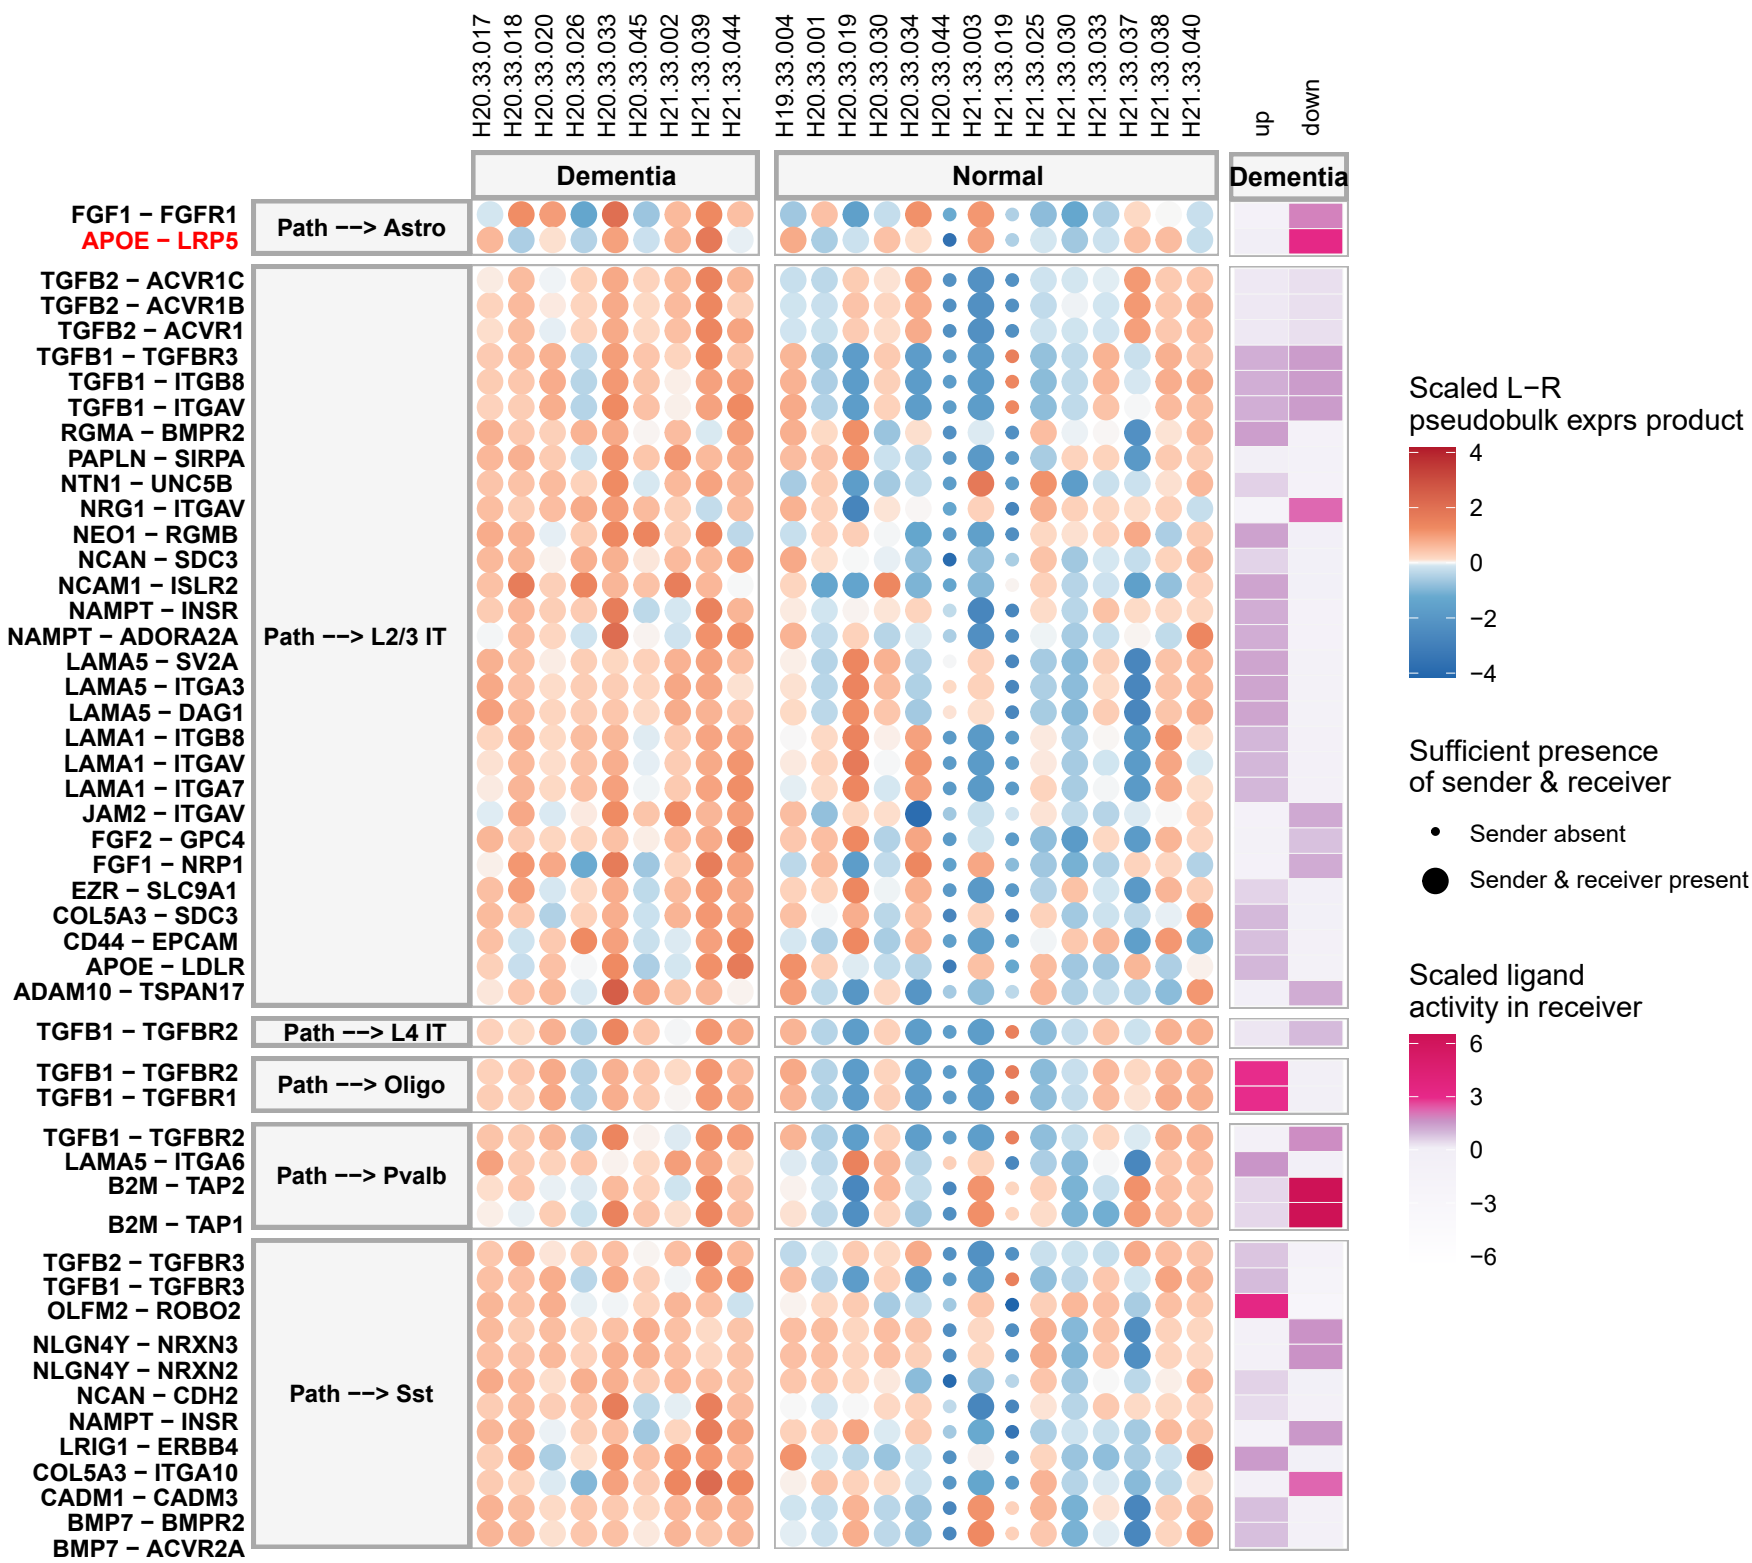

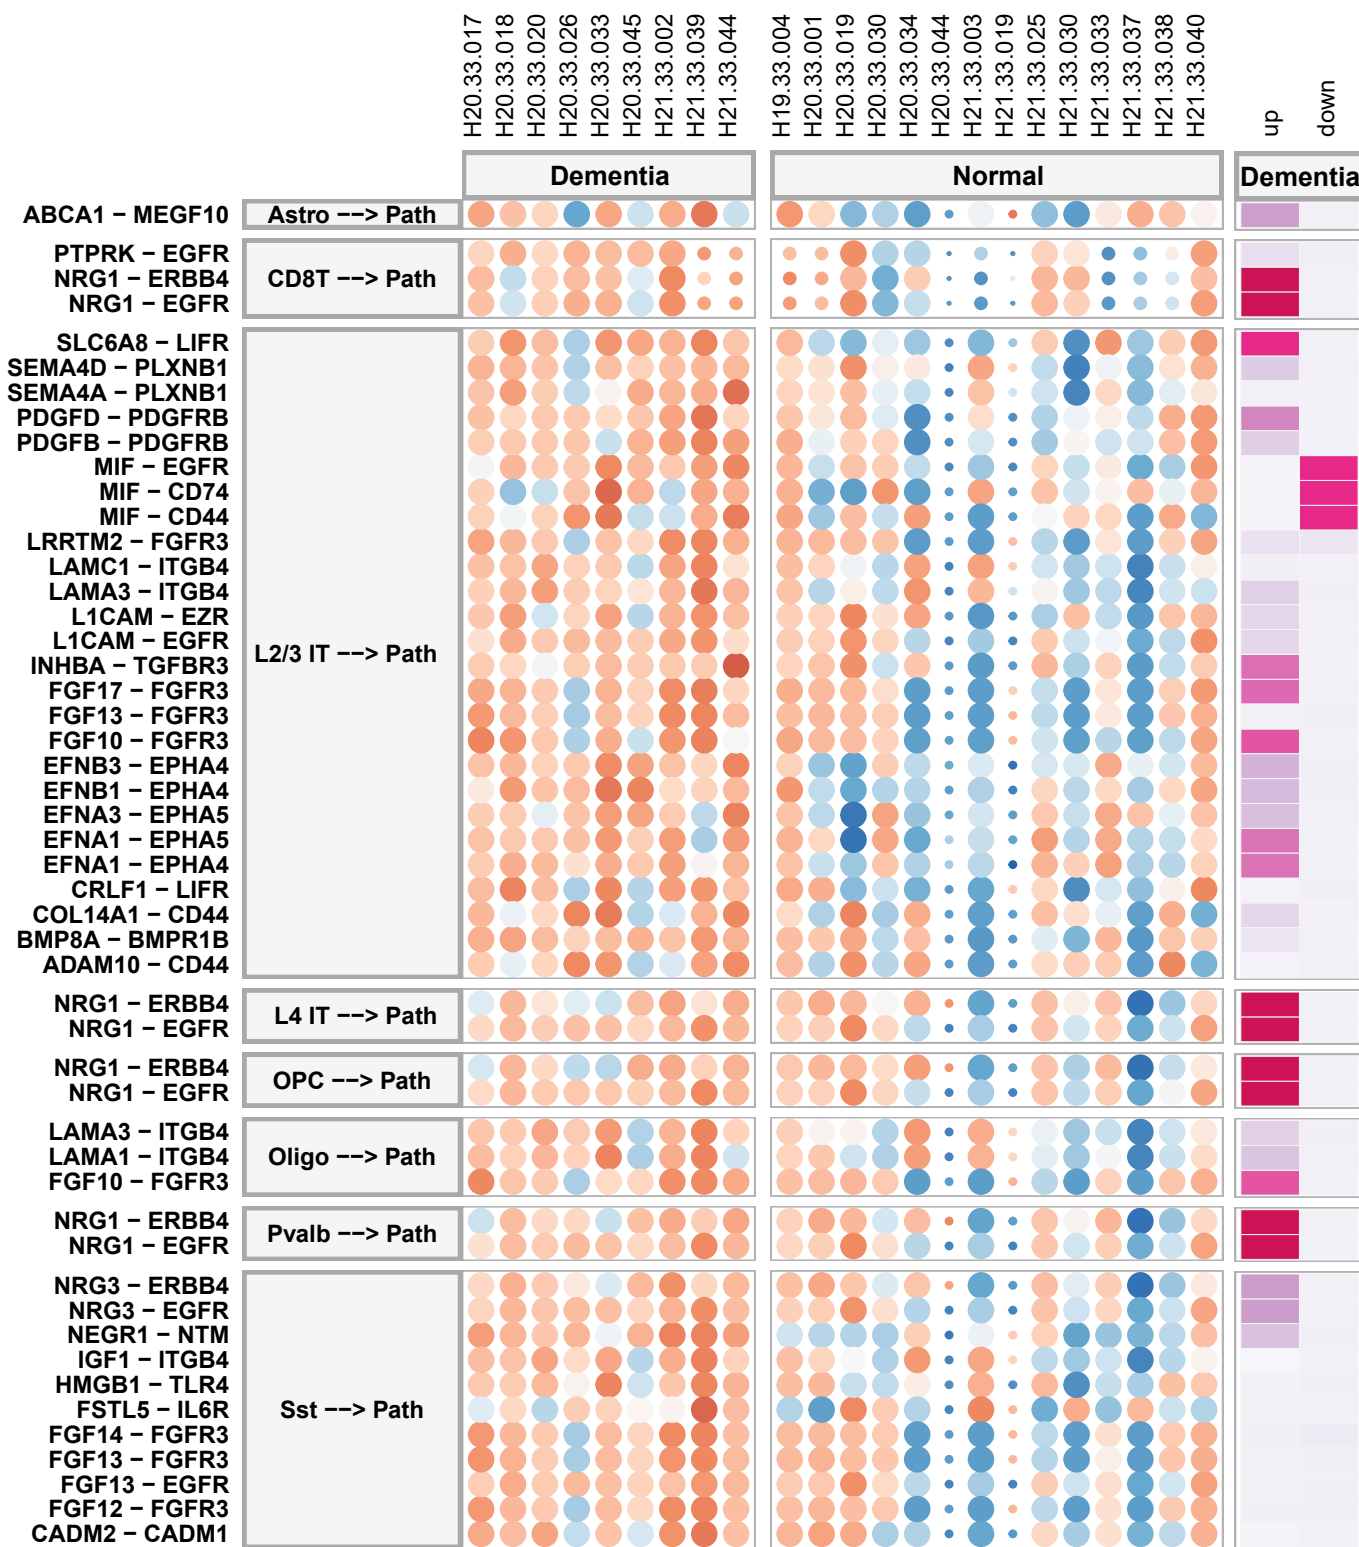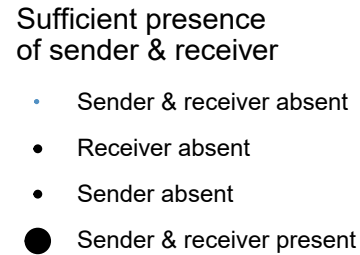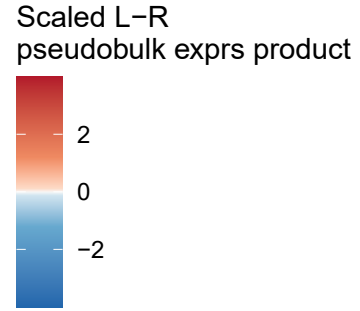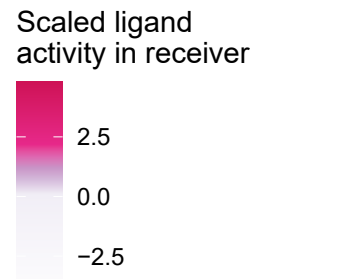

Supplement: s1 [file s1]

**A**

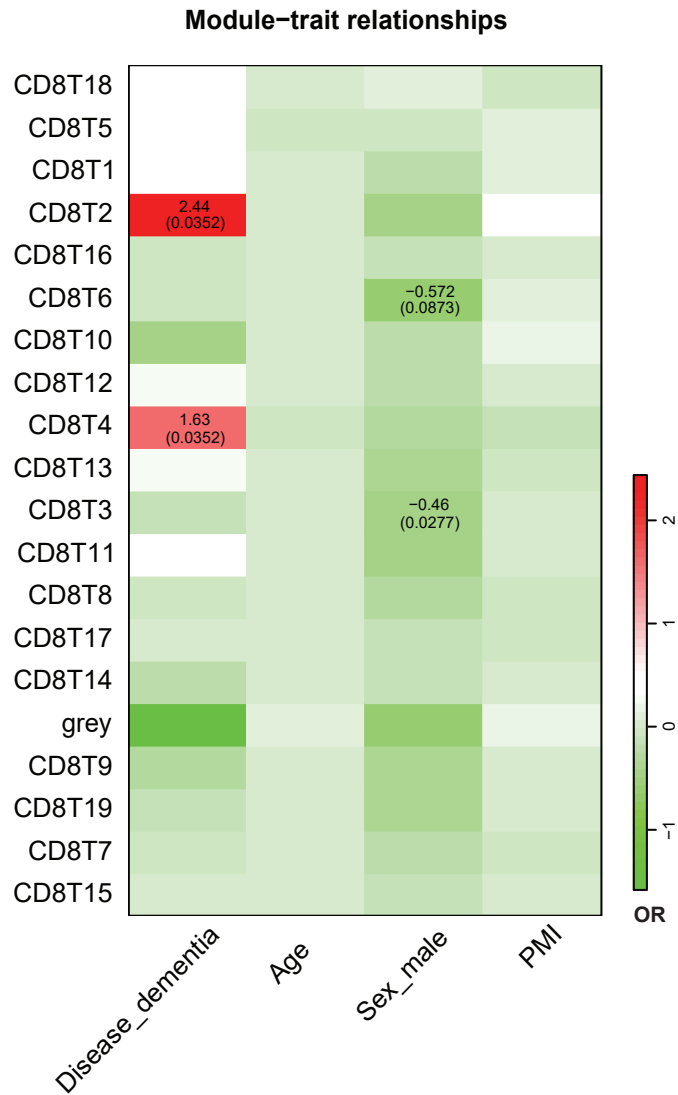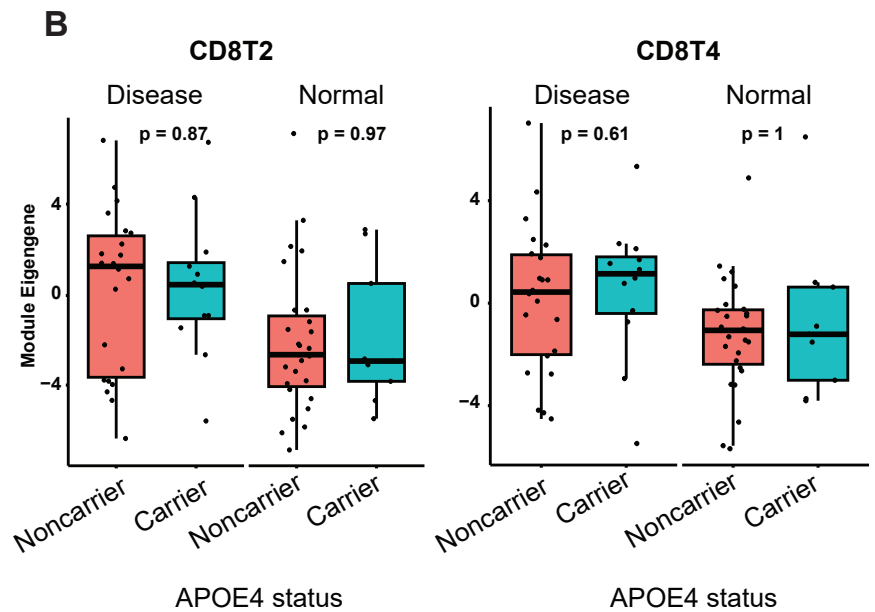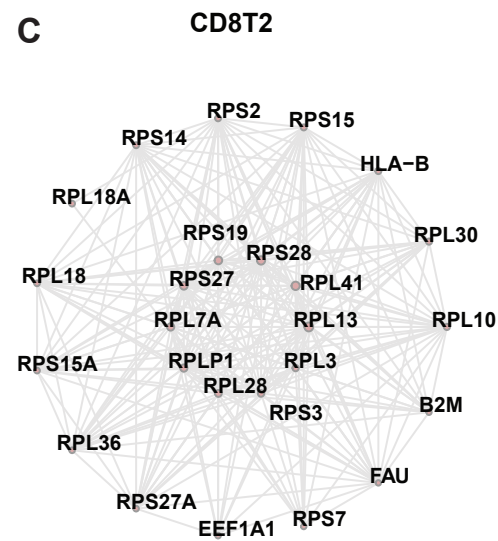

Supplement: s1 [file s1]

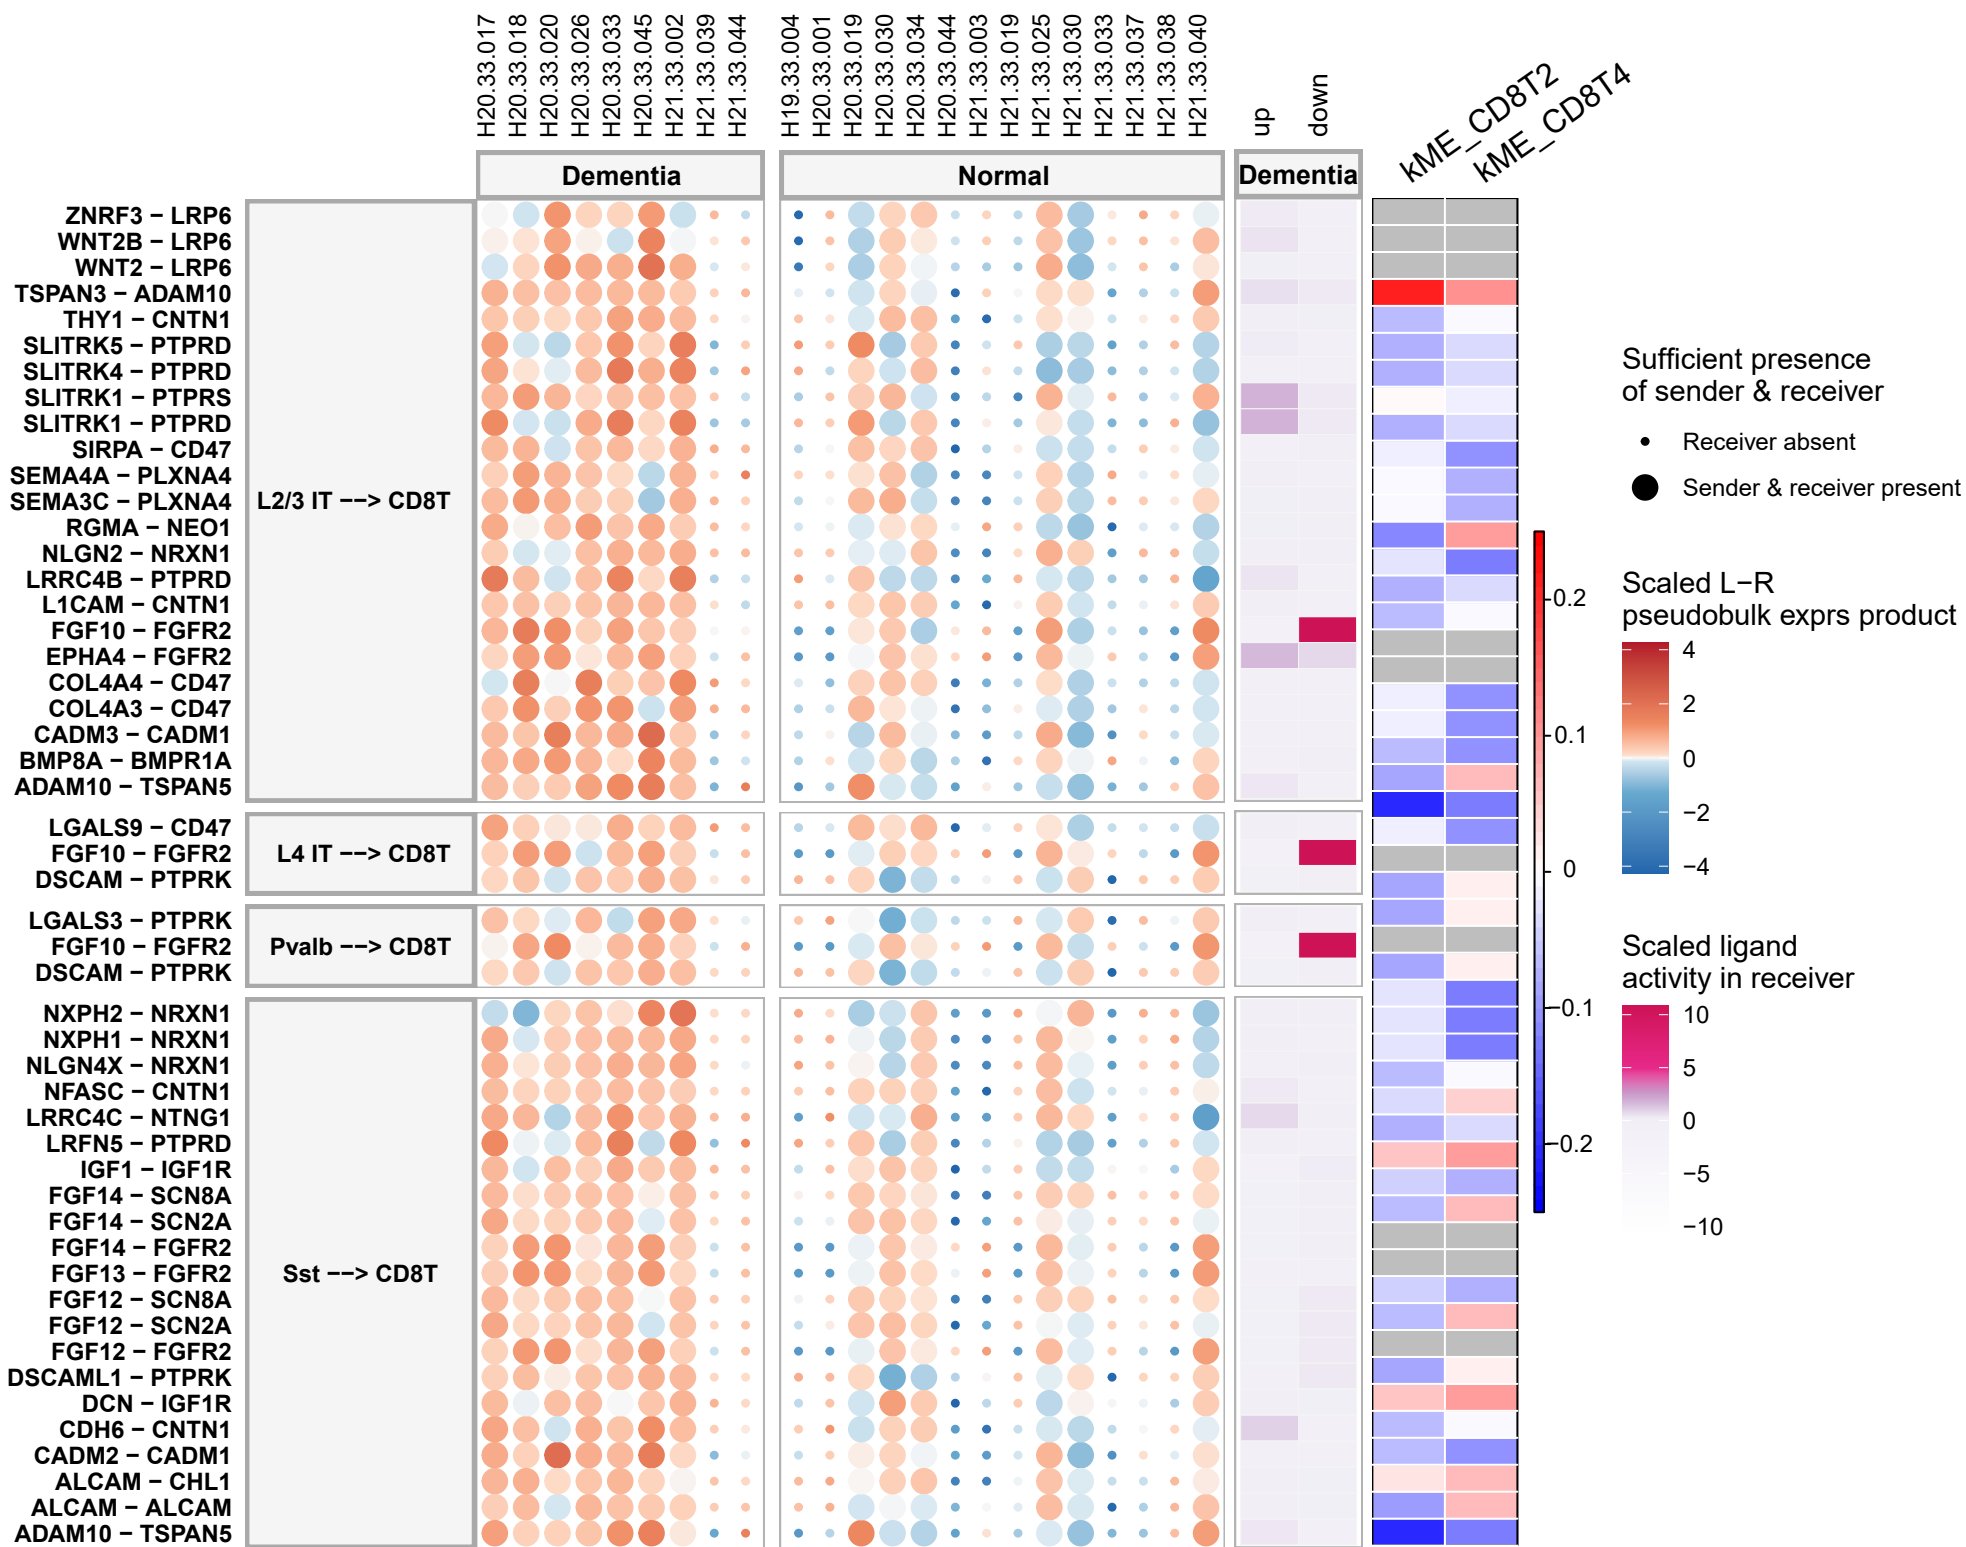

Supplement: s1 [file s1]

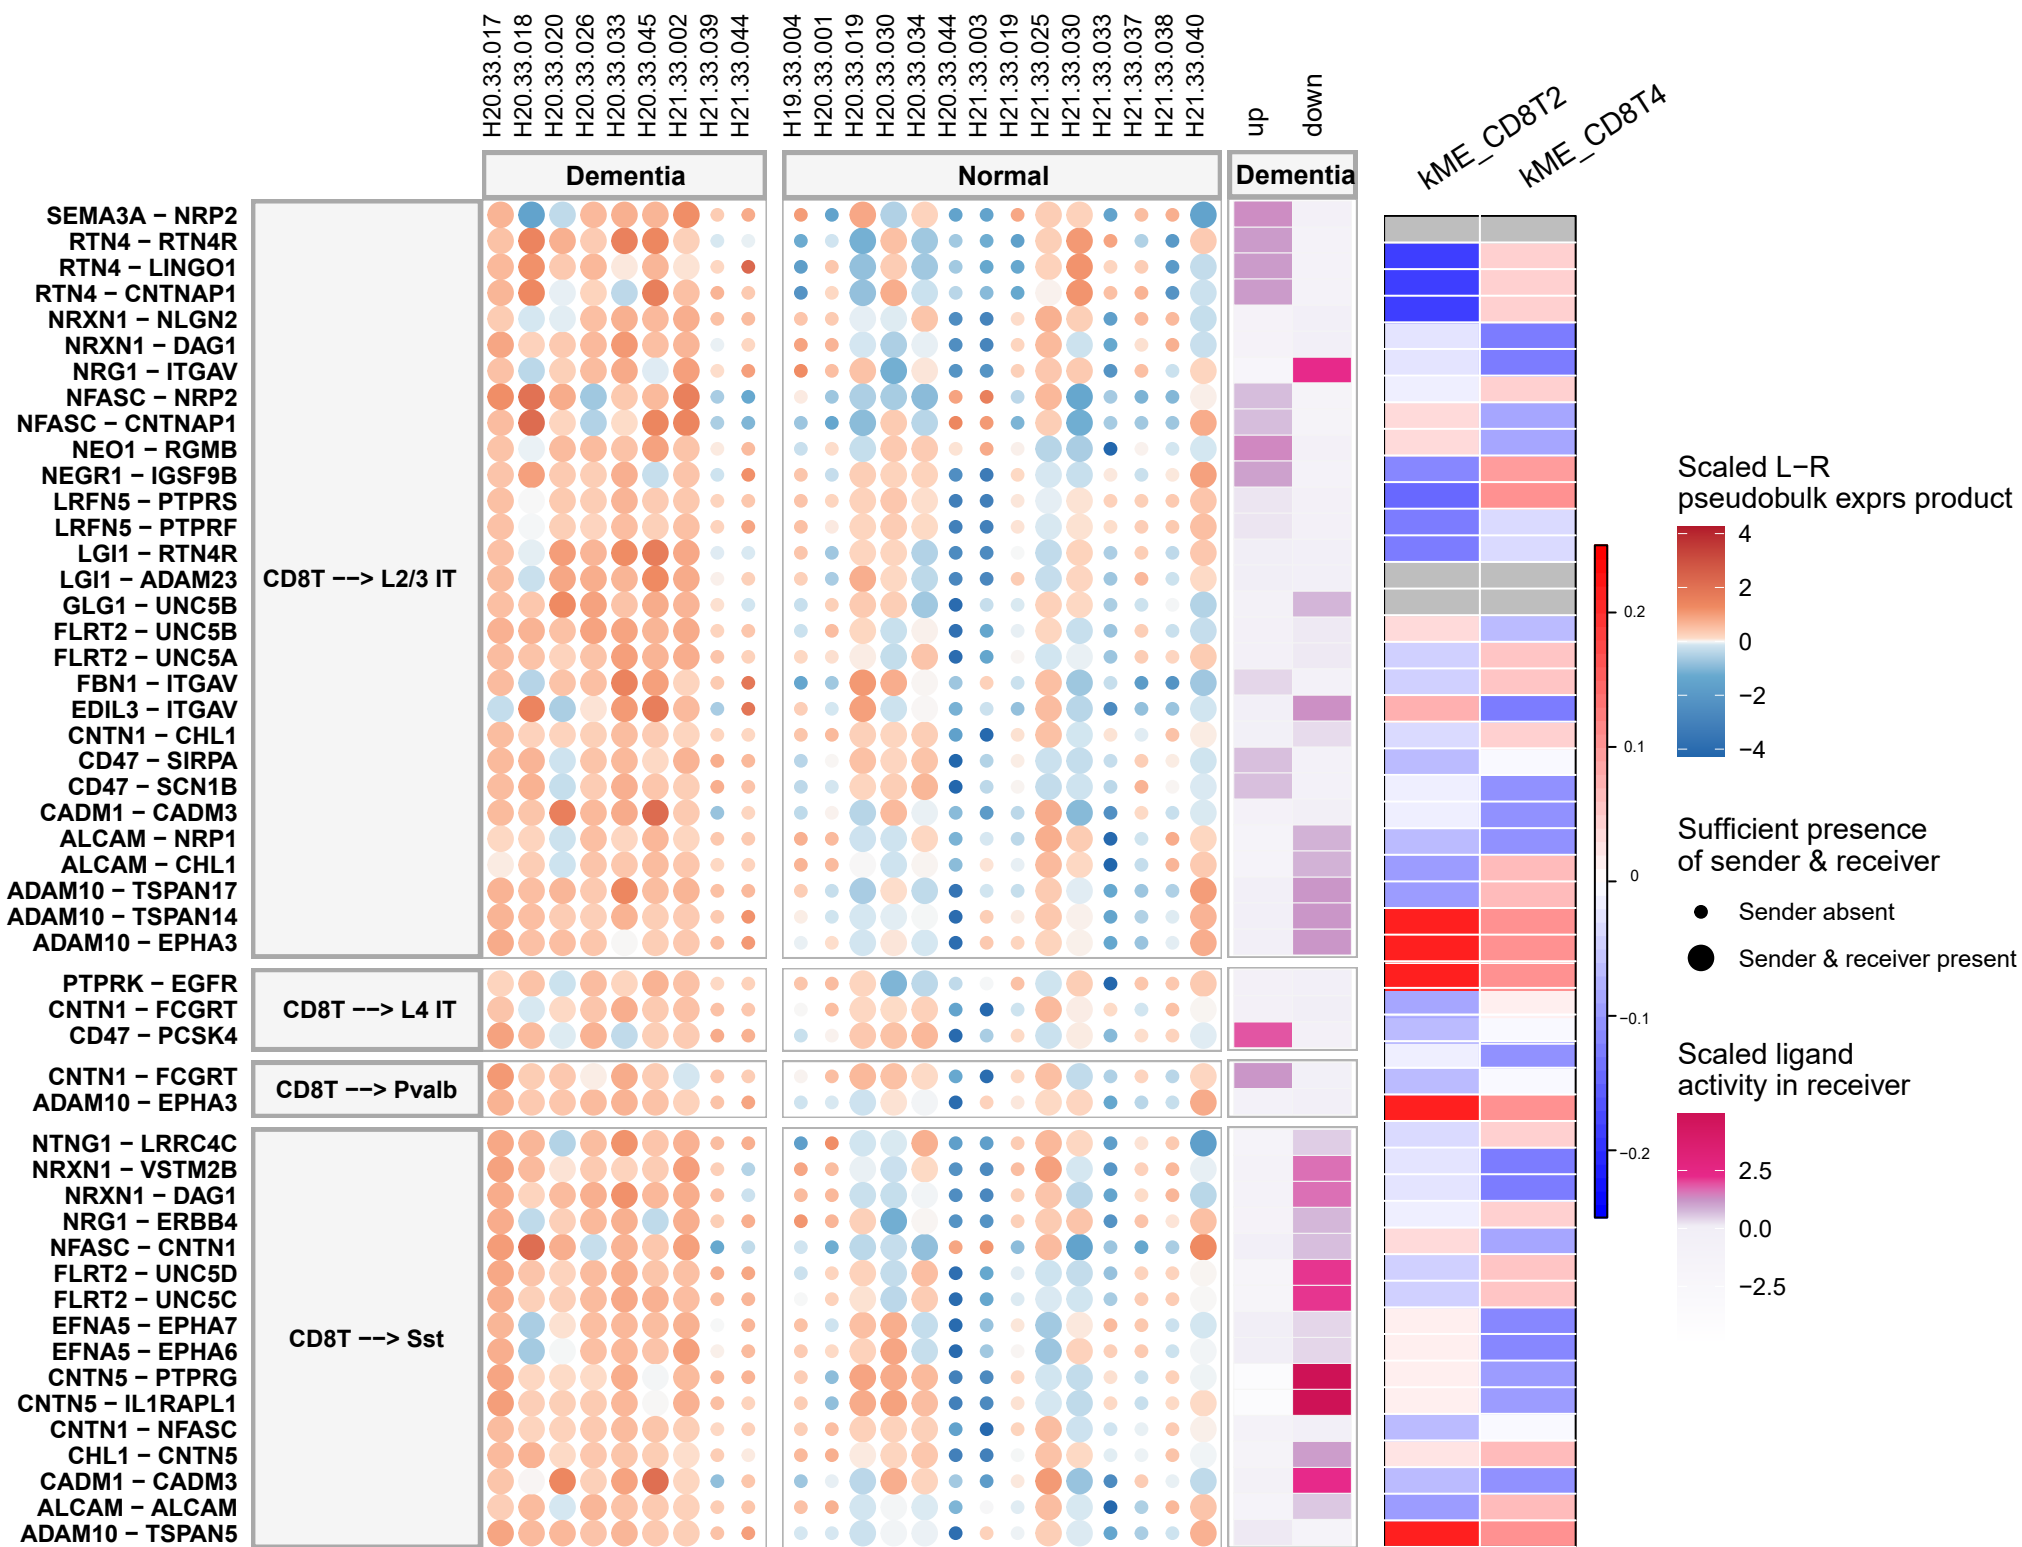

Supplement: s1 [file s1]

**A**

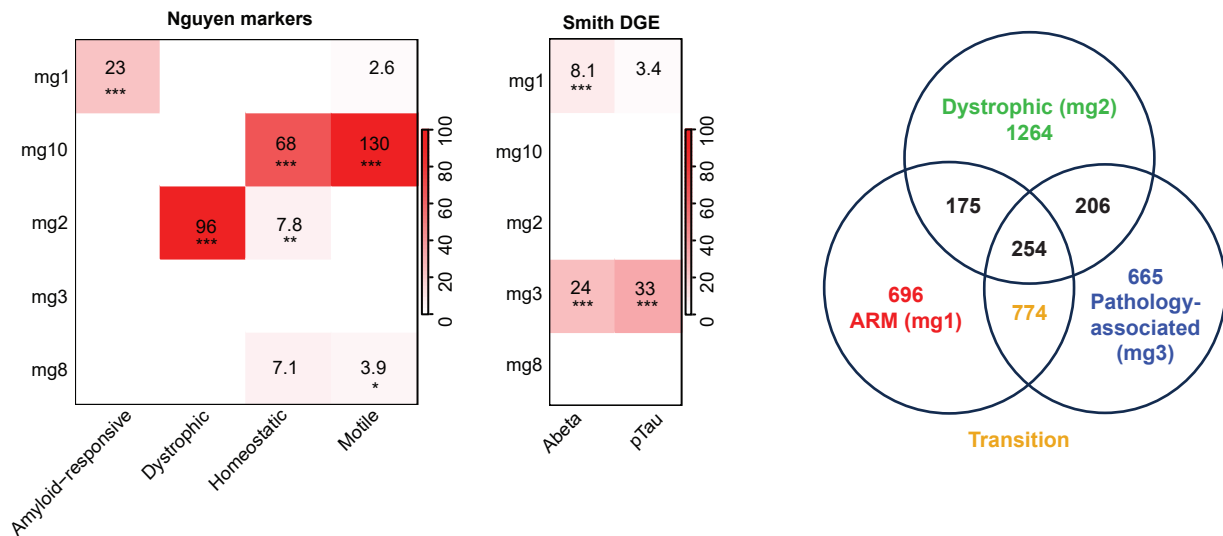

**B**

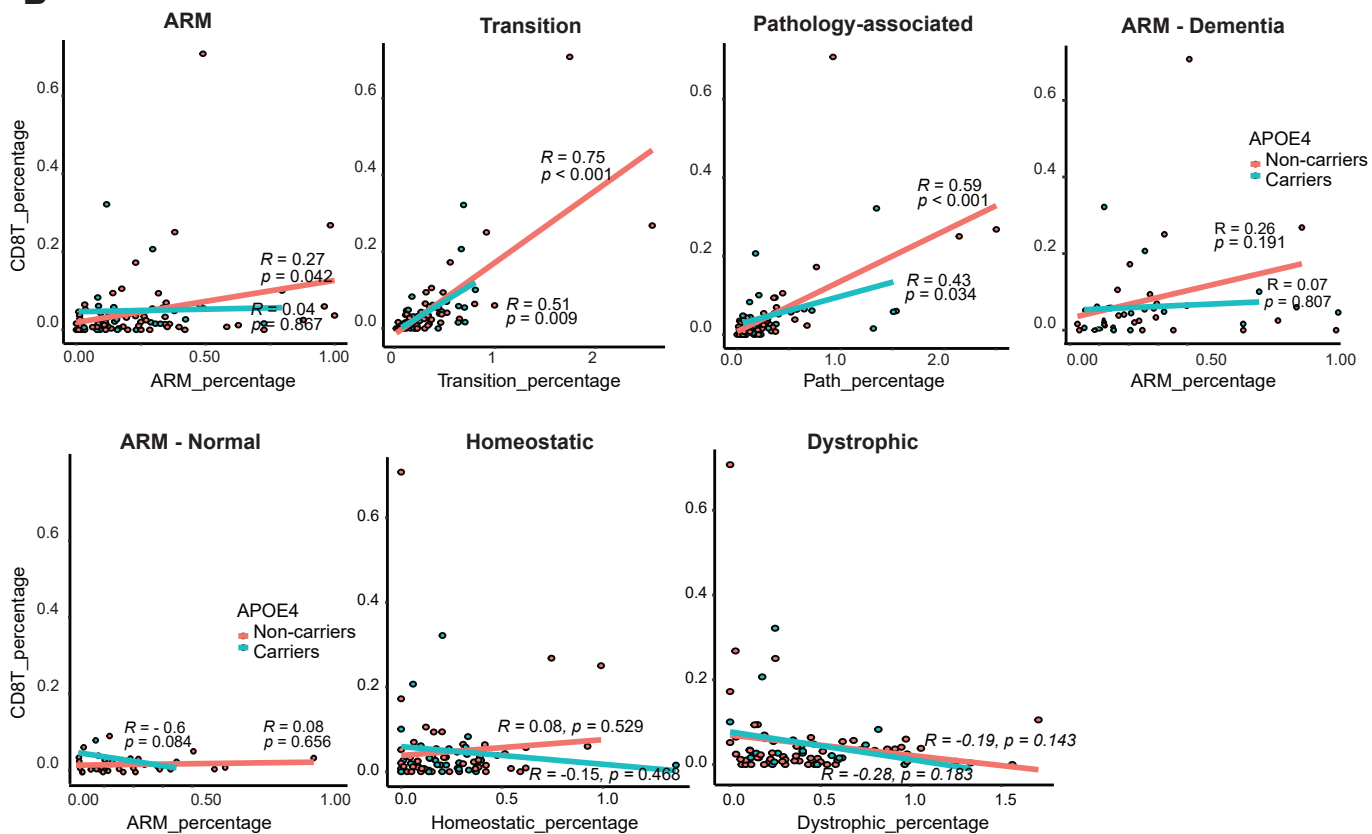

Supplement: s1 [file s1]

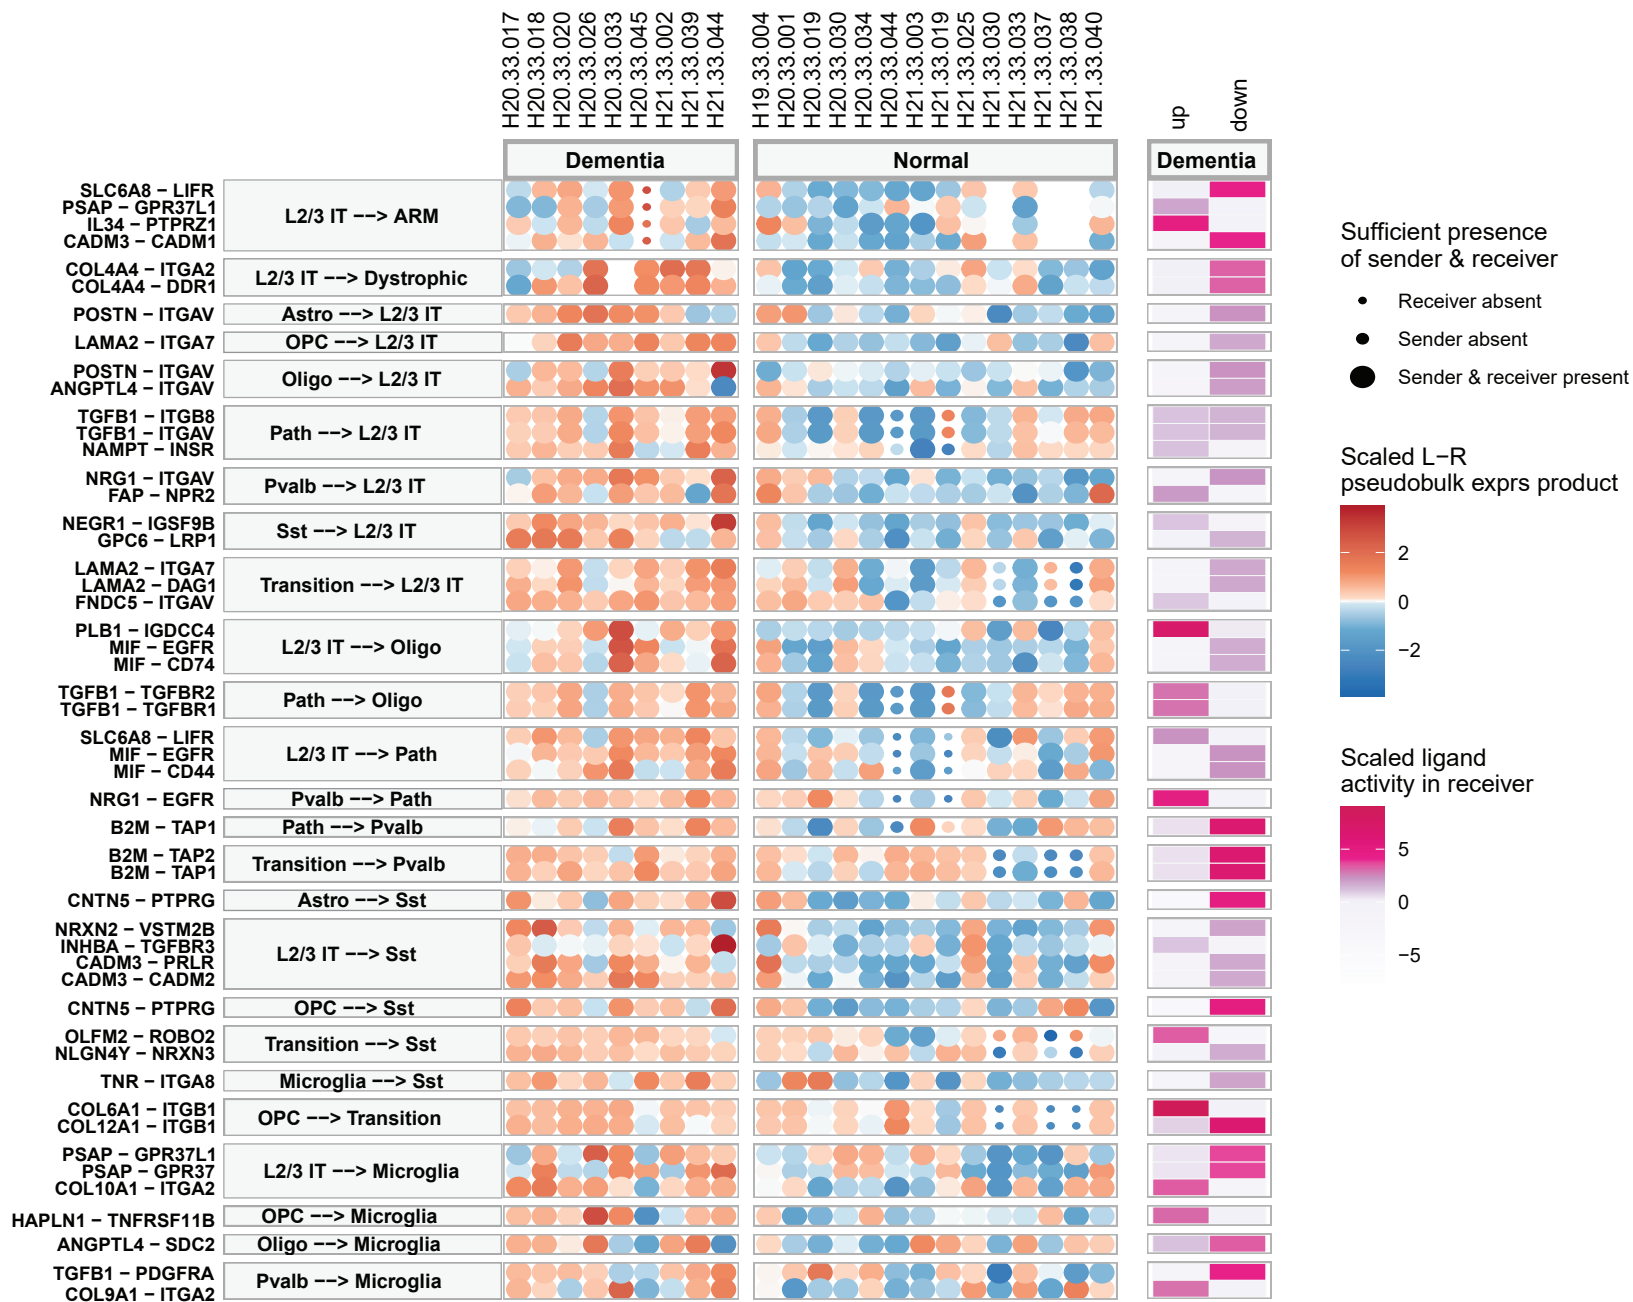

Supplement: s1 [file s1]

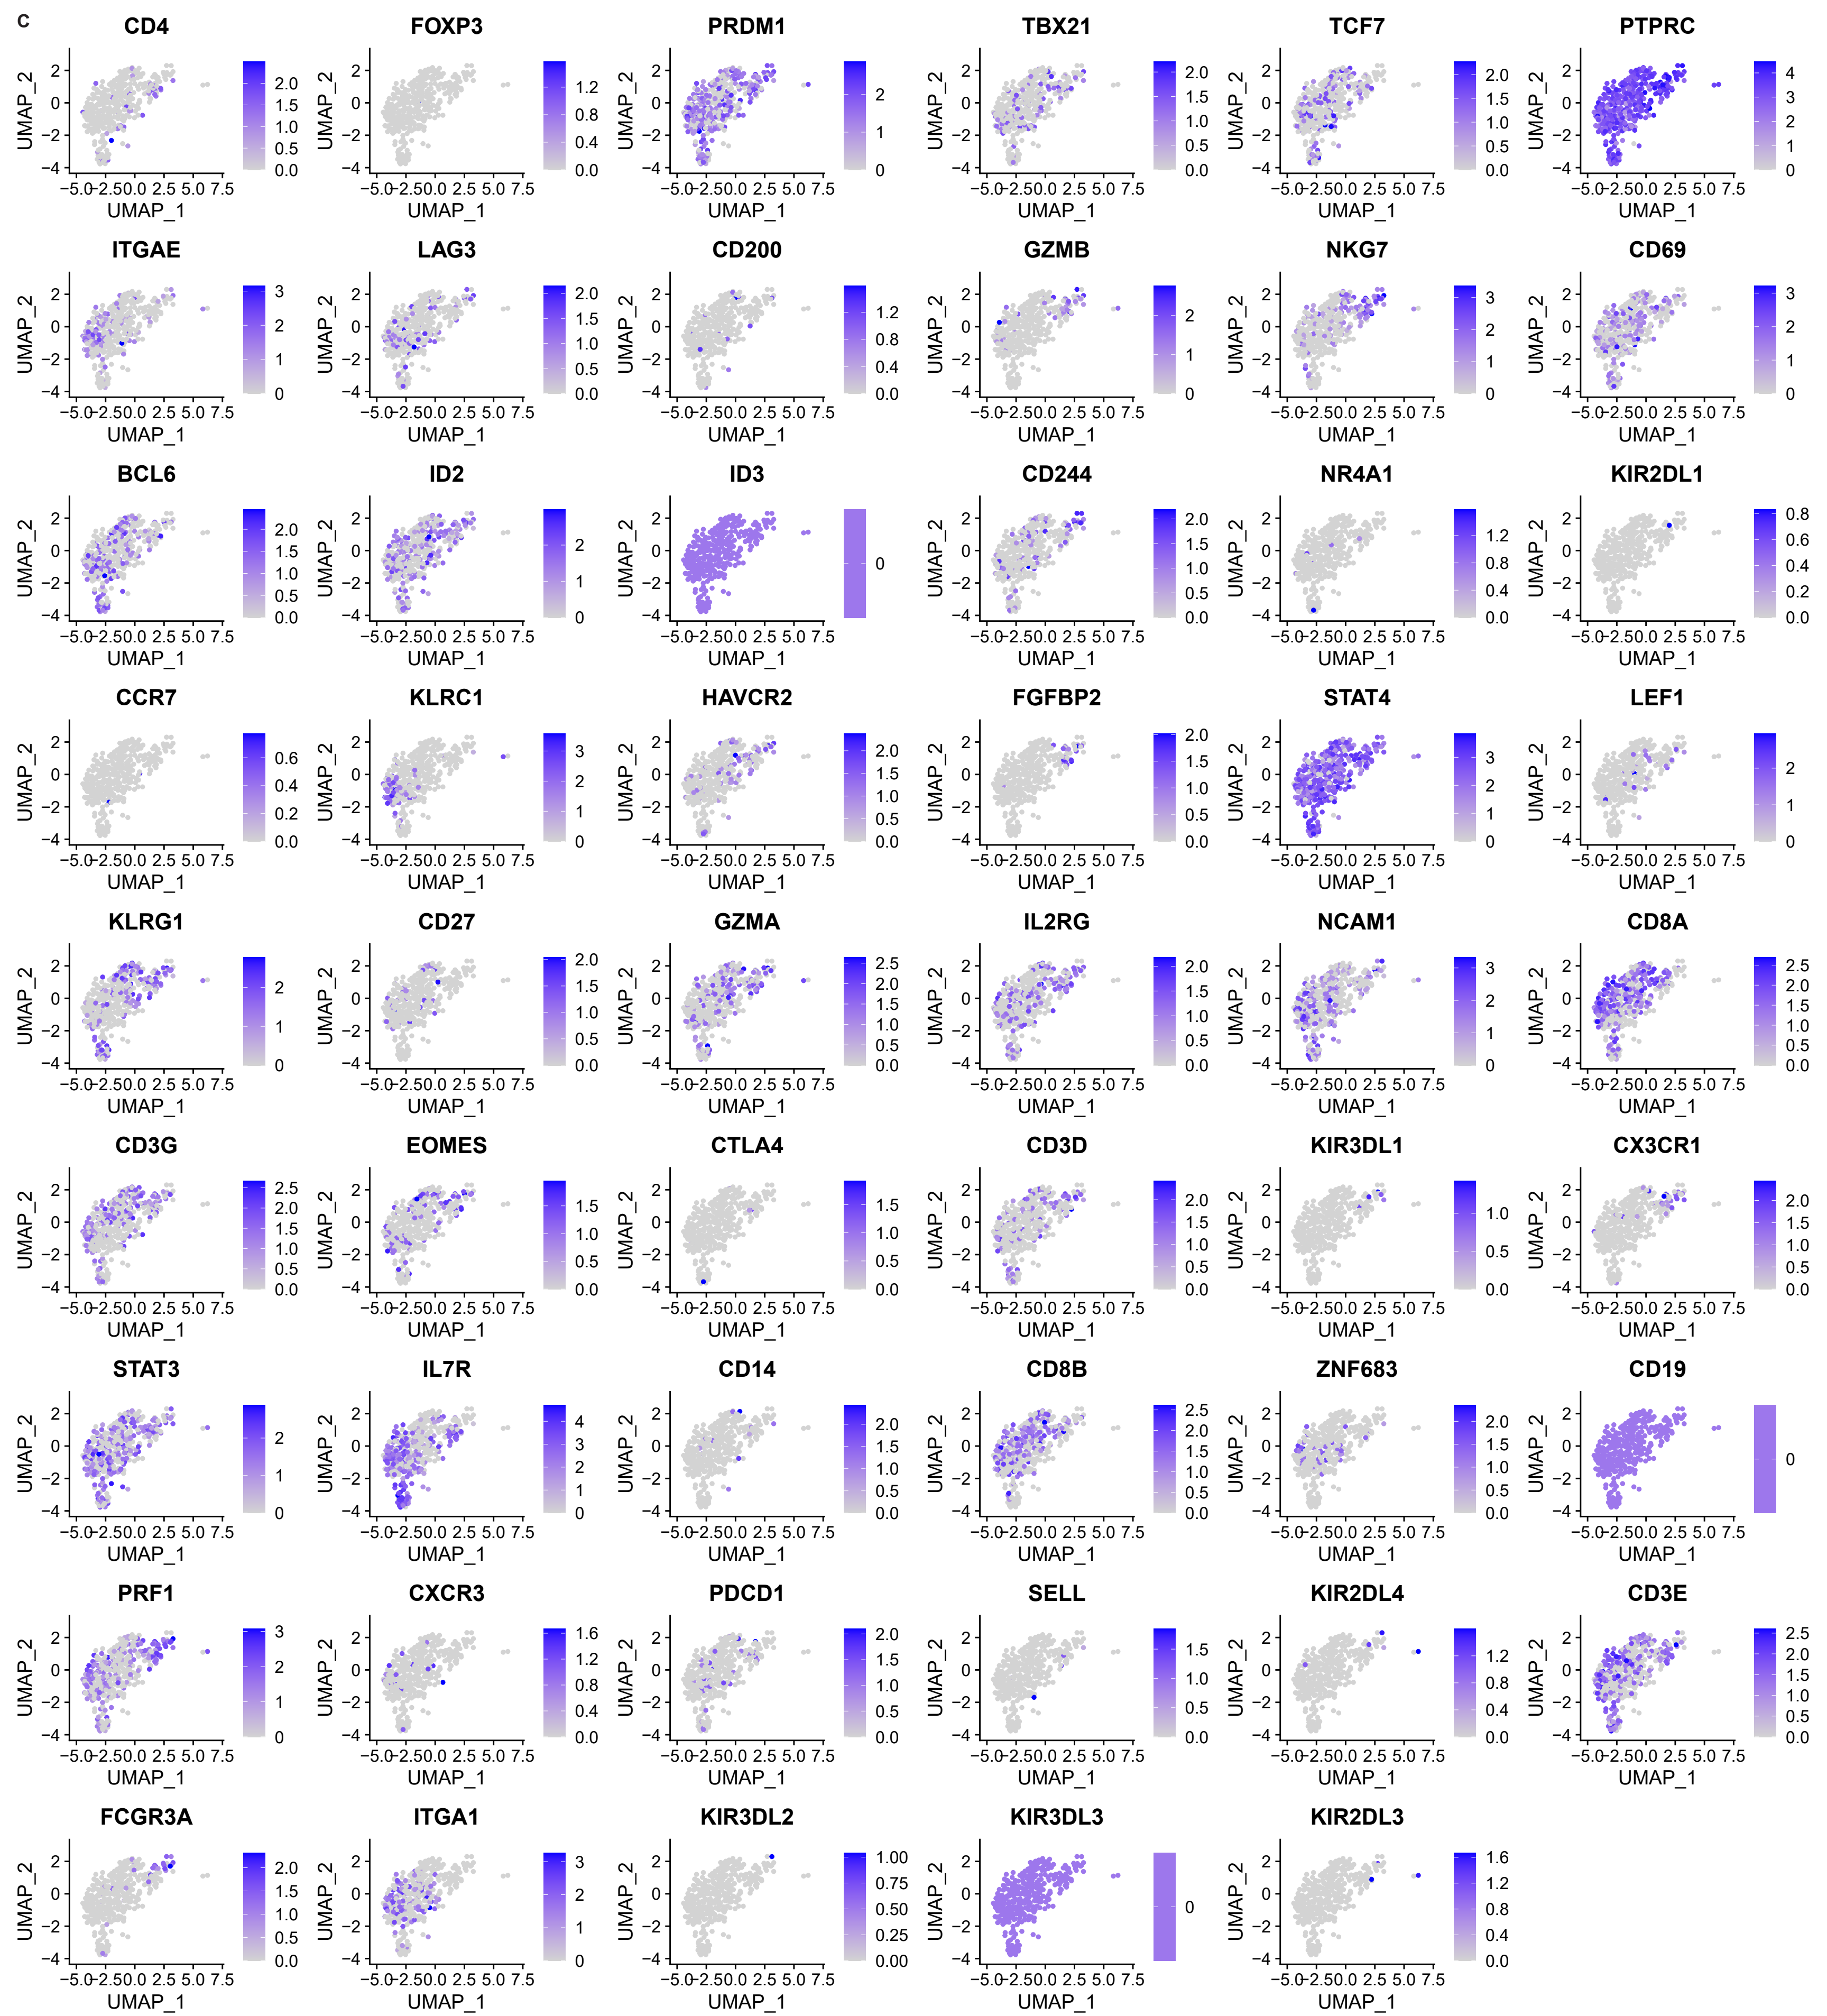

Supplement: s1 [file s1]

**Seurat clusters**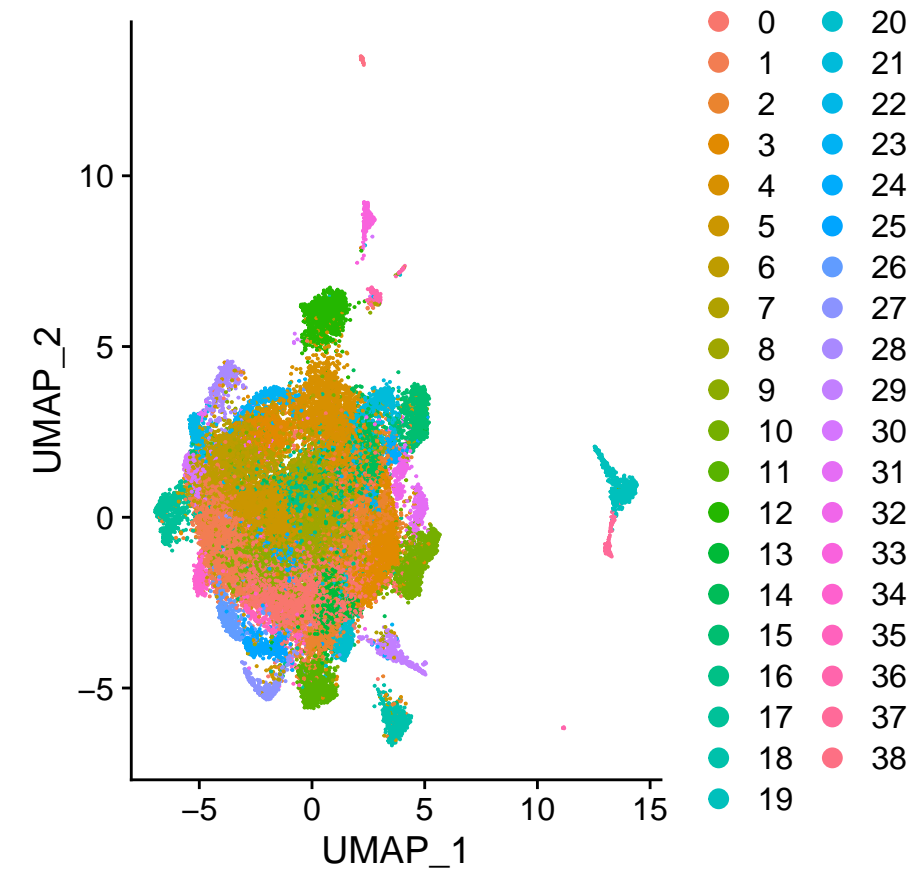**Age at death**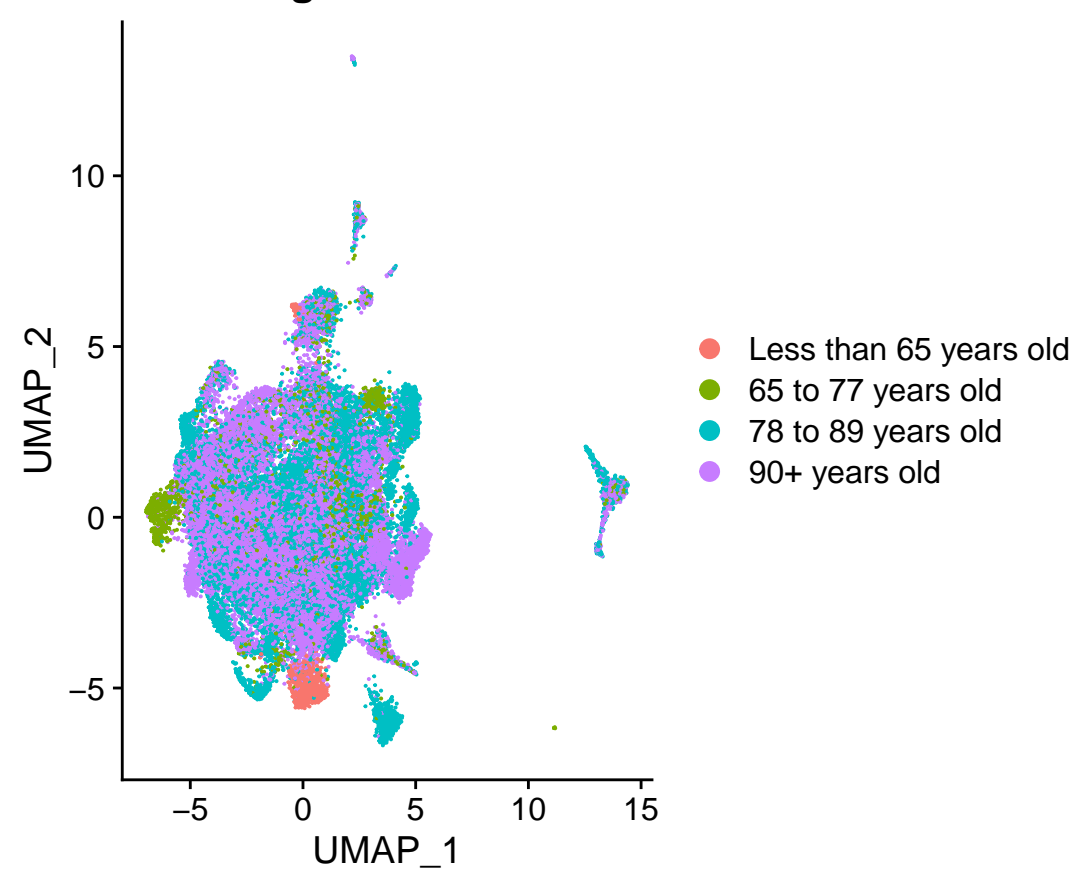**Donor ID**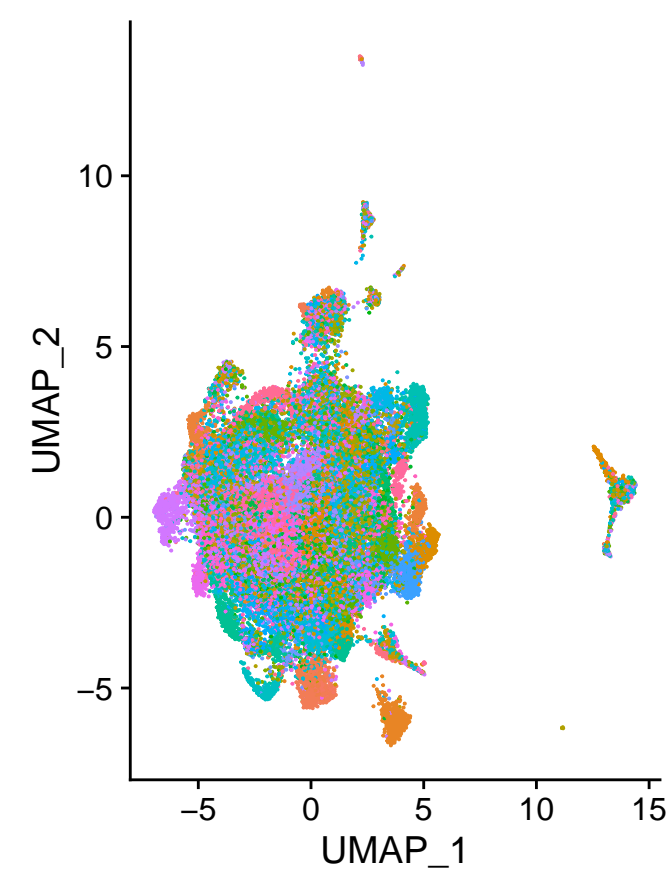**Specimen ID**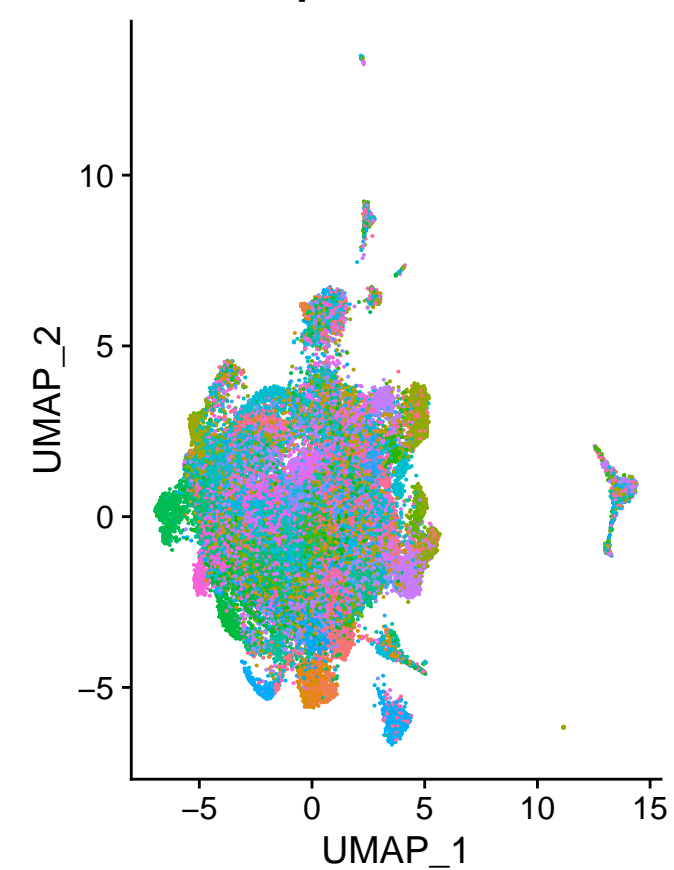**PMI**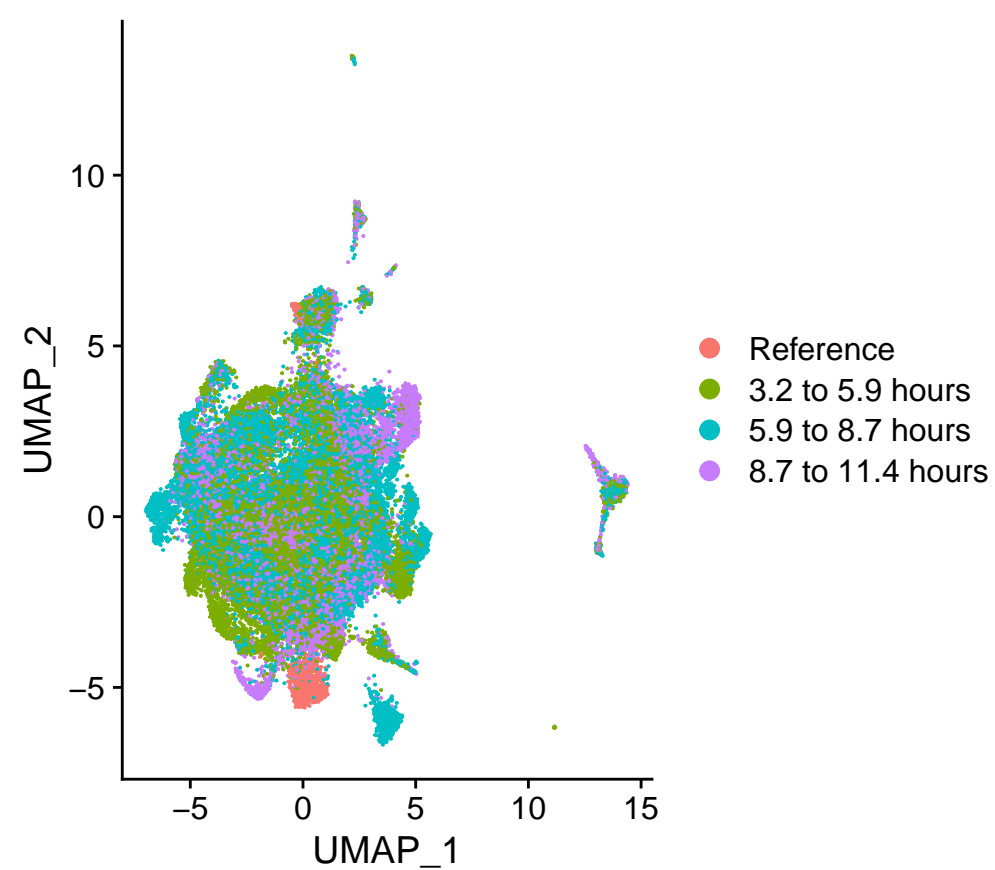**Sex**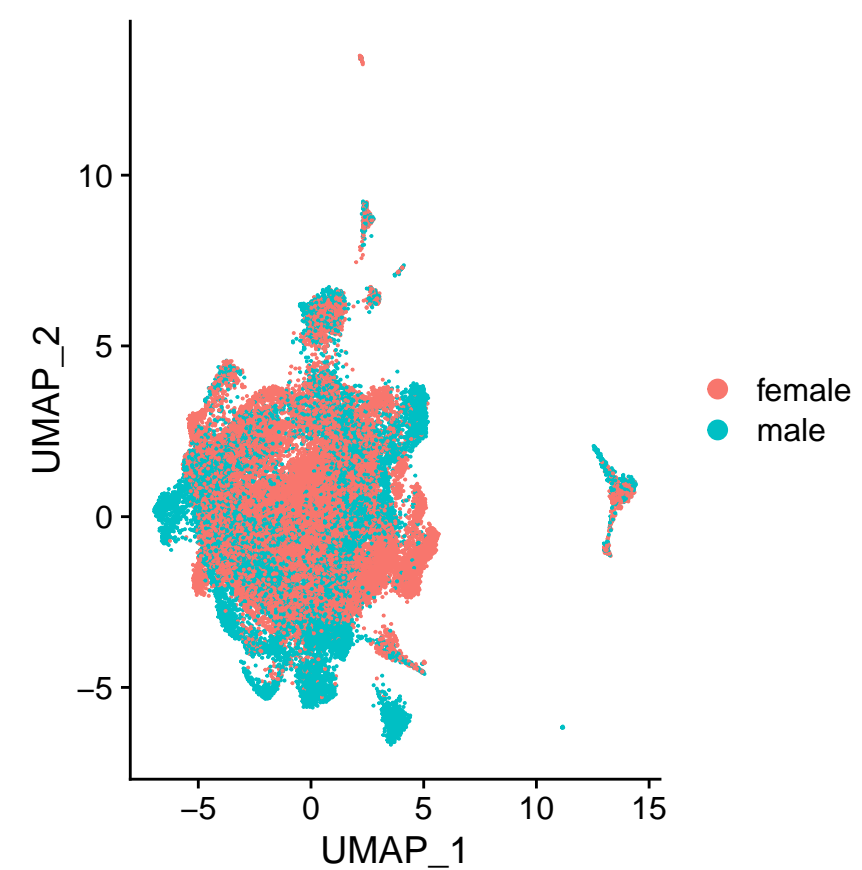

Supplement: s1 [file s1]

**A**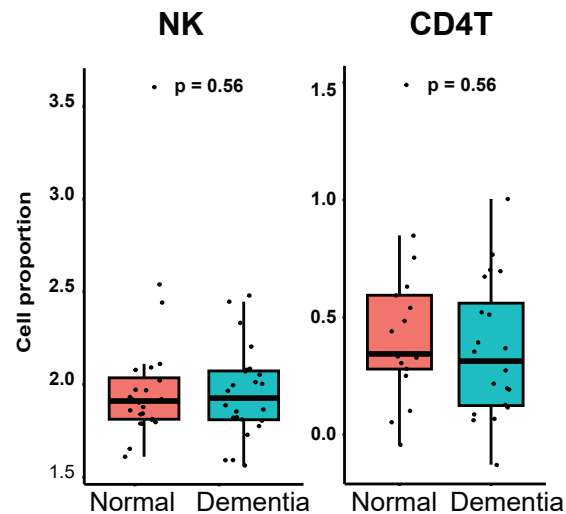**B**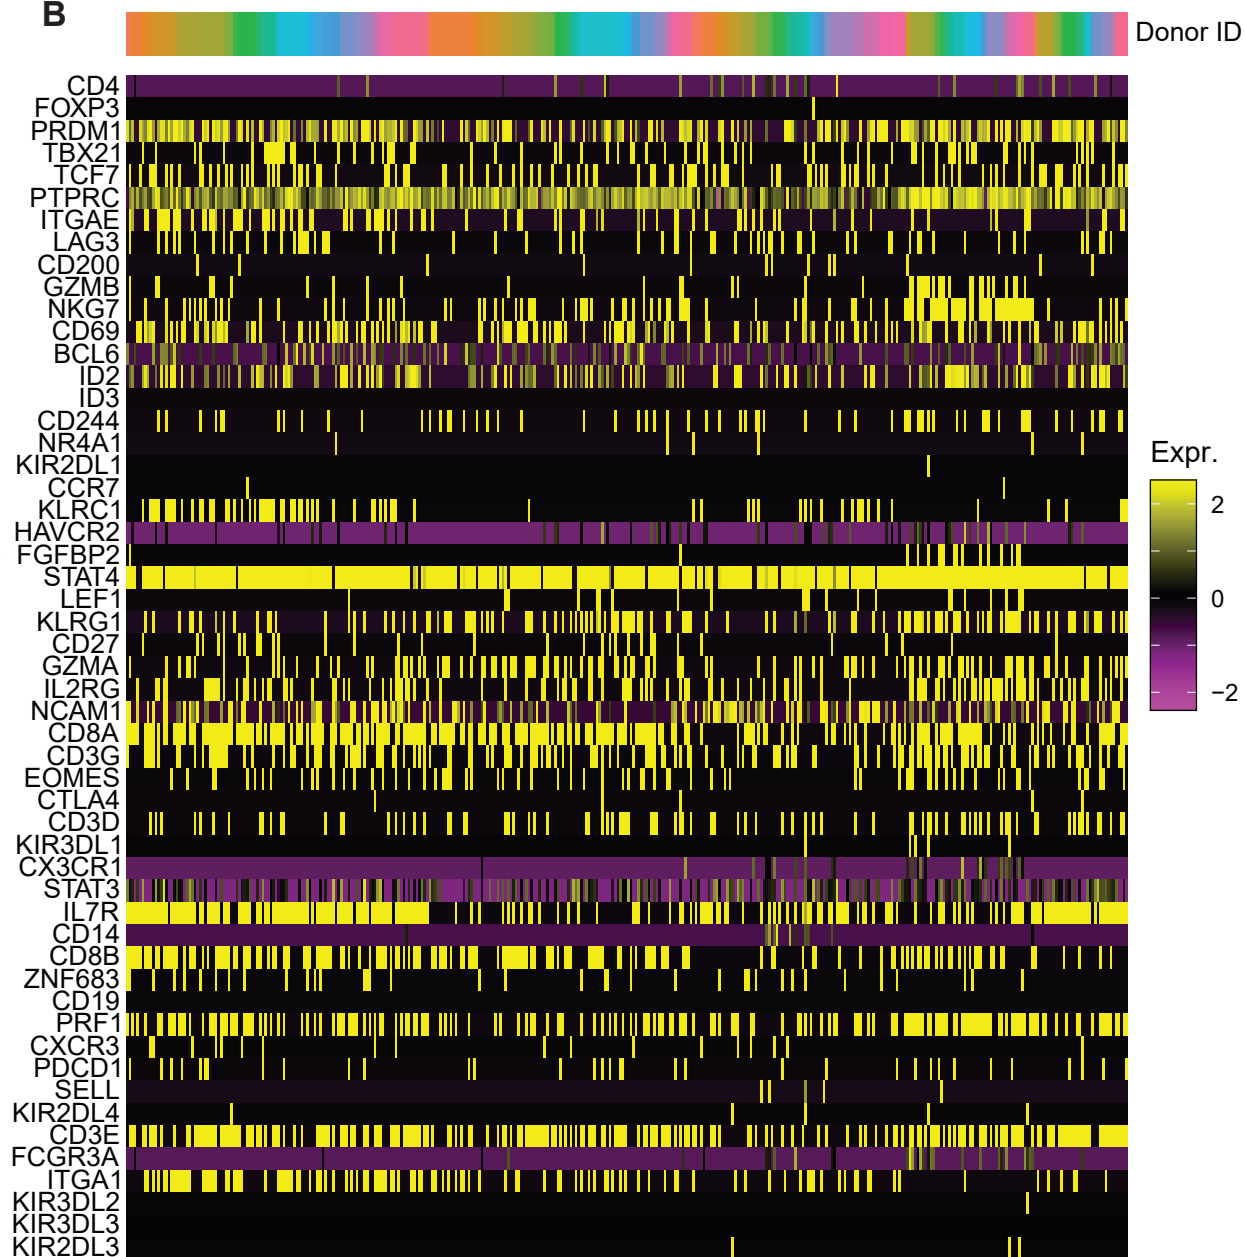

Supplement: s1 [file s1]

# Cell type a bundances per sample

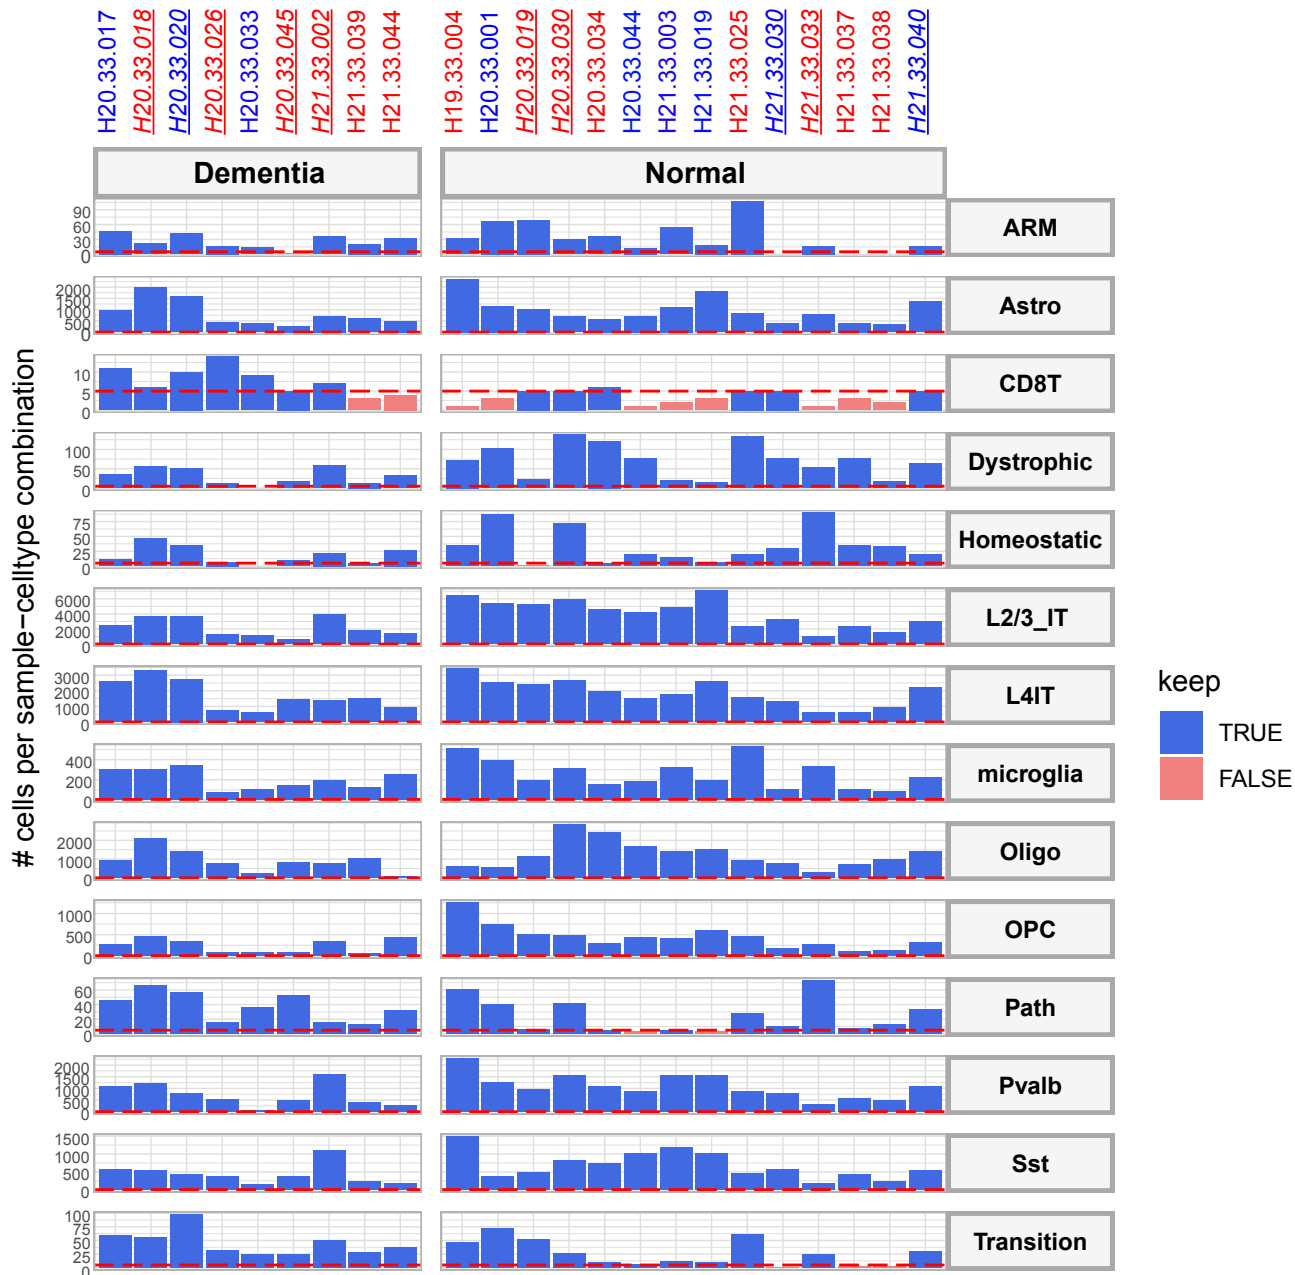

Supplement: s1 [file s1]

**A** Module-trait relationships

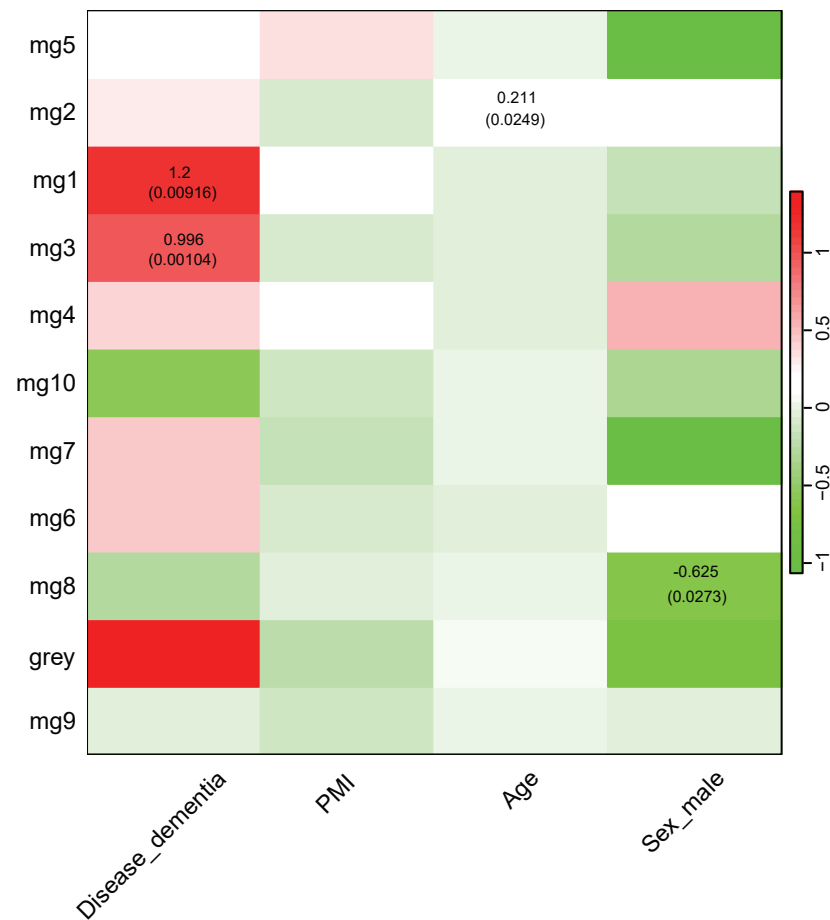

**B**

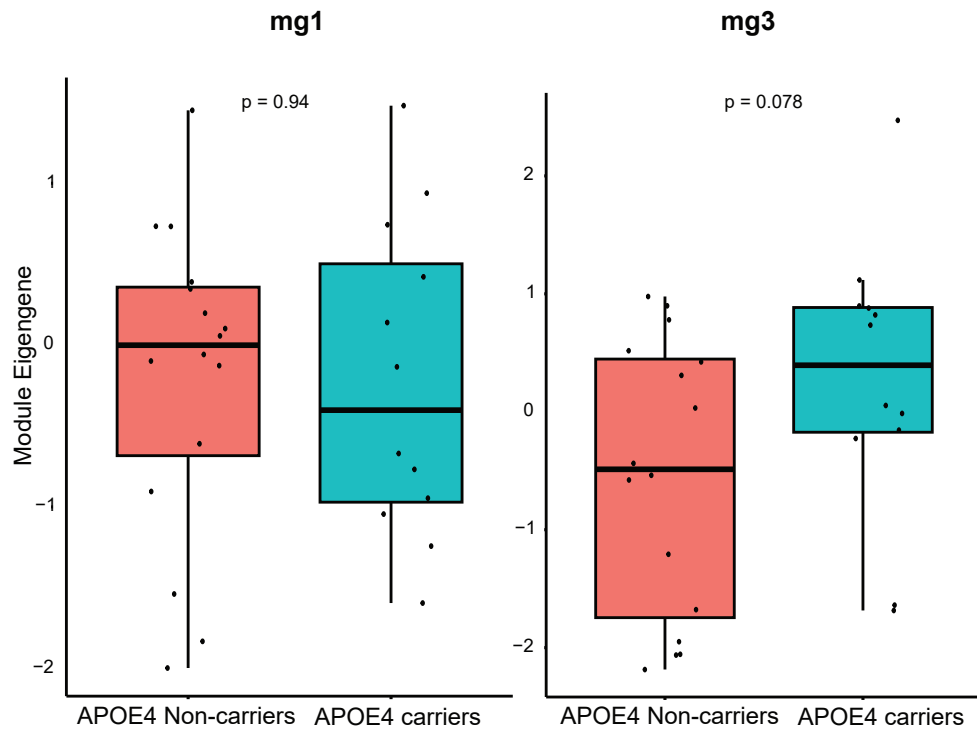

Supplement: s1 [file s1]

Dementia

Cognitively Normal

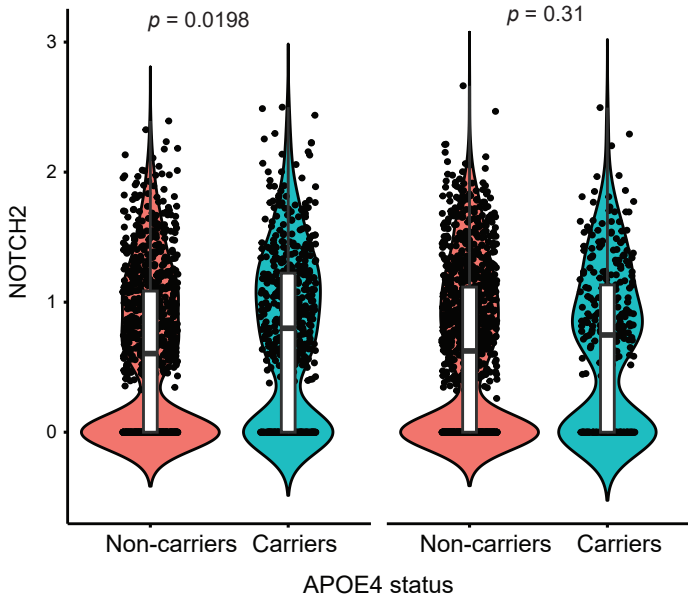

Supplement: s1 [file s1]
